# Supplementary material for: Discovery and molecular basis of subtype-selective cyclophilin inhibitors
Source: PubMed Central journal article supplement (PMC9596378; doi:10.1038/s41589-022-01116-1), 2022-09-26
Supplement: 41589_2022_1116_MOESM1_ESM.pdf [file 41589_2022_1116_MOESM1_ESM.pdf]

**Supplementary information**

---

**Discovery and molecular basis of subtype-selective cyclophilin inhibitors**

---

In the format provided by the authors and unedited

## Supplementary Information

### **Discovery and molecular basis of subtype-selective cyclophilin inhibitors**

Alexander A. Peterson, Aziz M. Rangwala, Manish K. Thakur, Patrick S. Ward, Christie Hung, Ian R. Outhwaite, Alix I. Chan, Dmitry L. Usanov, Vamsi K. Mootha, Markus A. Seeliger\*, David R. Liu\*

\* Correspondence: [drliu@fas.harvard.edu](mailto:drliu@fas.harvard.edu), [markus.seeliger@stonybrook.edu](mailto:markus.seeliger@stonybrook.edu)

Supplementary Table 1 | Calculated abundance of each human cyclophilin family member from paxdb<sup>4,1</sup>

Supplementary Table 2 | Overview of all cyclophilin-selective inhibitors reported in this work

Supplementary Table 3 | Plasmids and primers used for USER cloning of CypD mutant expression constructs

Supplementary Table 4 | Plasmids and primers used for cloning of CypA, CypB, and CypE mutant expression constructs

Supplementary Table 5 | Plasmids used for recombinant expression of cyclophilin proteins

Supplementary Table 6 | Concentrations of cyclophilins used in competition anisotropy binding assay with A26-FI

Supplementary Table 7 | High-resolution mass spectroscopy results for intermediates reported in this work

Supplementary Table 8 | High-resolution mass spectroscopy results for macrocycles reported in this work

Supplementary Table 9 | Crystal diffraction statistics for all CypD-inhibitor co-crystal structures reported in this work

Supplementary Figure 1 | Cyclosporine A interactions with active site residues of CypD

Supplementary Figure 2 | Surface plasmon resonance measurement of JOMBt and JOBBt binding to immobilized CypD

Supplementary Figure 3 | Prolyl isomerase activity of cyclophilins on Suc-AAPF-AMC

Supplementary Figure 4 | Functionalization of piperidine  $\alpha$ -carbon improves CypD potency, while replacing the second building block improves CypD selectivity

Supplementary Figure 5 | Large S2 binding groups improve selectivity for CypD

Supplementary Figure 6 | Large hydrophobic S2 binding groups impart selectivity for CypD over CypG, CypH, NKTR, and PPWD1

Supplementary Figure 7 | Biphenyl and bi-aromatic derivatives of B2 showing no improvement in selectivity for CypD

Supplementary Figure 8 | Para-carbonyl-containing biphenyl moieties show partial selectivity over CypC

Supplementary Figure 9 | Para-carboxy-containing biphenyl groups provide enhanced selectivity and potency for CypD

Supplementary Figure 10 | Masking or moving the carboxylate of B23 results in loss in potency and selectivity for CypD

Supplementary Figure 11 | Inverting ligand charge abrogates CypD potency and shifts the cyclophilin selectivity profile

Supplementary Figure 12 | Nitrile-containing biphenyl groups show similar CypD inhibition potencies and linker dependencies as carboxylates

Supplementary Figure 13 | Residue K118 is necessary for potent CypD inhibition with carboxylate-containing inhibitors

Supplementary Figure 14 | S123 gatekeeper position dictates inhibitor potency

Supplementary Figure 15 | Prolyl isomerase inhibition activity on CypD gatekeeper mutants

Supplementary Figure 16 | Derivatives of B23 that show similar selectivity and potency profiles for CypD

Supplementary Figure 17 | Derivatives of B23 that show reduced potency and selectivity for CypD

Supplementary Figure 18 | B23 derivatives that can simultaneously interact with CypD residues K118 and S119 and present a carboxylate near gatekeeper residues

Supplementary Figure 19 | The CypB E121S gatekeeper mutant is inhibited more potently compared to wild-type CypB by carboxylate-containing inhibitors

Supplementary Figure 20 | The CypA E81S/K82R gatekeeper mutant is inhibited more potently compared to wild-type CypA with carboxylate-containing inhibitors

Supplementary Figure 22 | Prolyl isomerase inhibition by CypD-selective inhibitors used in mitochondrial models of mPTP

Supplementary Figure 23 | Additional independent replicates of calcium retention assays in mitochondria

Supplementary Figure 24 | Representative images of Cy5-conjugated CypD inhibitor localization in HeLa cells

Supplementary Figure 25 | CypD inhibition of Cy5-conjugated CypD inhibitors

Supplementary Figure 26 | Fluorescence polarization competition with A26-FI against lysine-containing cyclophilins

Supplementary Figure 27 | Fluorescence polarization competition with A26-FI against CypE with control compounds C5A and C6A

Supplementary Figure 28 | Prolyl isomerase inhibition by C1A, C3A, C5A, and C6A

Supplementary Figure 29 | Mass spectroscopy analysis of C3A covalent modification on 13 cyclophilins

Supplementary Figure 30 | CypE mutant FP analysis

Supplementary Figure 31 | Prolyl isomerase inhibition screening of CypE lysine mutants reveals K217 residue as site of C3A covalent modification

Supplementary Figure 32 | Ligand-dependent conformation of primary gatekeeper residues S123 and R124 in the S2 pocket

Supplementary Figure 33 | Molecular footprinting analysis demonstrates that key binding interactions of B52 are unique to CypD

Supplementary Figure 34 | Electron densities of ligands from CypD-inhibitor co-crystal structures

Supplementary Figure 35 | SDS-PAGE of recombinantly expressed cyclophilin proteins

Supplementary Note 1:

Python Scripts

Analysis of CypD selection high-throughput sequencing data

Calculating enrichment values of library members

Supplementary Note 2:

Synthetic Methods

Generalized procedures

Synthesis of intermediates

Synthesis of final macrocycles

<sup>1</sup>H-NMR Spectra

HPLC Chromatograms

Supplementary References

**Supplementary Table 1 | Calculated abundance of each human cyclophilin family member from paxdb<sup>4.1</sup>.** CypD is the third most abundant cyclophilin, while CypB and CypA are the second and first, respectively (see Wang, M., Herrmann, C. J., Simonovic, M., Szklarczyk, D. & von Mering, C. Version 4.0 of PaxDb: Protein abundance data, integrated across model organisms, tissues, and cell-lines. *Proteomics* **15**, 3163–3168 (2015)). CypA is one of the most abundantly expressed proteins in human cells. Therefore, selectivity over CypA is the most important for CypD selective inhibition in biological models. Compounds **B52/B53**, **B32**, and **C3A** *in vitro* show >100-fold selectivity for CypD, CypD K118E/R124A, and CypE, respectively, over CypA.

| Cyclophilin | Gene   | Protein abundance:<br>H.Sapiens whole<br>integrated (ppm) | Normalized CypD<br>abundance |
|-------------|--------|-----------------------------------------------------------|------------------------------|
| CypD        | PPIF   | 187                                                       | 1                            |
| CypA        | PPIA   | 4317                                                      | 23.1                         |
| CypB        | PPIB   | 248                                                       | 1.33                         |
| CypC        | PPIC   | 0.226                                                     | 0.00121                      |
| Cyp40       | PPID   | 13.5                                                      | 0.0722                       |
| CypE        | PPIE   | 61.7                                                      | 0.330                        |
| CypG        | PPIG   | 24.2                                                      | 0.129                        |
| CypH        | PPIH   | 11.9                                                      | 0.0636                       |
| PPIL1       | PPIL1  | 17.8                                                      | 0.0952                       |
| PPIL2       | PPIL2  | 3.14                                                      | 0.0168                       |
| CypJ/PPIL3  | PPIL3  | 4.62                                                      | 0.0247                       |
| PPIL4       | PPIL4  | 2.14                                                      | 0.0114                       |
| PPIL6       | PPIL6  | 0.167                                                     | 0.000893                     |
| PPWD1       | PPWD1  | 29.2                                                      | 0.156                        |
| RanBP2      | RanBP2 | 35.5                                                      | 0.190                        |
| SDCCAG      | CWC27  | 1.82                                                      | 0.00973                      |
| NKTR        | NKTR   | 0.108                                                     | 0.000577                     |

**Supplementary Table 2 | Overview of all cyclophilin-selective inhibitors reported in this work.** Inhibitor IC<sub>50</sub> values from prolyl-isomerase inhibition on the targeted cyclophilin are highlighted in dashed boxes. The inhibition potencies against all other cyclophilins are normalized to this IC<sub>50</sub> value and are shown as a fold-difference. Boxes are shaded according to the fold-difference value. Each cyclophilin is inhibited selectively due to the identity of its unique S2 pocket residues and the S2 pocket binding moiety of the inhibitor.

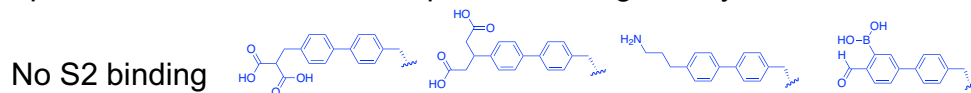

| Non-selective                                                              | CypD selective                                                      |                                                                     | CypD K118E/R124A selective                                                                                                   | CypE selective |                                       |
|----------------------------------------------------------------------------|---------------------------------------------------------------------|---------------------------------------------------------------------|------------------------------------------------------------------------------------------------------------------------------|----------------|---------------------------------------|
| CsA                                                                        | B52                                                                 | B53                                                                 | B32                                                                                                                          | C3A            | Residues proximal to biphenyl         |
| 13 nM (1x)                                                                 | 10 nM (1x)                                                          | 57 nM (1x)                                                          | 100x                                                                                                                         | 46x            | CypD (Lys, Ser, Arg)                  |
| 2x                                                                         | 31x                                                                 | 14x                                                                 | 120x                                                                                                                         | 13 nM (1x)     | CypE (Lys, Lys, Lys)                  |
| 1x                                                                         | 21x                                                                 | 19x                                                                 | 50x                                                                                                                          | 310x           | CypB (Lys, Glu, Arg)                  |
| 1x                                                                         | 110x                                                                | 60x                                                                 | 130x                                                                                                                         | 230x           | CypA (Lys, Glu, Lys)                  |
| 2x                                                                         | 600x                                                                | 750x                                                                | 33x                                                                                                                          | 31x            | PPIL1 (Ala, Lys, Gln)                 |
| 11x                                                                        | 2200x                                                               | >900x                                                               | 67x                                                                                                                          | 140x           | Cyp40 (Glu, Glu, Lys)                 |
| 1x                                                                         | >10000x                                                             | >900x                                                               | 20x                                                                                                                          | 1300x          | CypC (Val, Glu, Thr)                  |
| 2x                                                                         | >10000x                                                             | >900x                                                               | 180x                                                                                                                         | 3100x          | CypG (Glu, Gly, Phe)                  |
| 15x                                                                        | >10000x                                                             | >900x                                                               | 13x                                                                                                                          | 620x           | PPWD1 (Glu, Gly, Glu)                 |
| 6x                                                                         | >10000x                                                             | >900x                                                               | >830x                                                                                                                        | >3800x         | CypH (Ala, Gly, Pro)                  |
| 38x                                                                        | >10000x                                                             | >900x                                                               | >830x                                                                                                                        | 2500x          | NKTR (Glu, Gly, Tyr)                  |
|                                                                            |                                                                     |                                                                     | 60 nM (1x)                                                                                                                   |                | CypD K118E/R124A (Glu, Ser, Ala)      |
| Reported non-binder for PPIL2, PPIL6, SDCCAG-10. Unknown for PPIL3, PPIL4. | No active site binding by fluorescence polarization <b>B52-FI</b> . | No active site binding by fluorescence polarization <b>B53-FI</b> . | Predicted weak binding due to weak potency of <b>A26-FI</b> by fluorescence polarization, which has poor S2-pocket occupancy |                | PPIL2, PPIL3, PPIL4, PPIL6, SDCCAG-10 |

Color Gradient: 100.00 90.00 80.00 70.00 60.00 50.00 40.00 30.00 20.00 10.00 9.00 8.00 7.00 6.00 5.00 4.00 3.00 2.00 1.00  
 Formatting Rules: Red ≥100x Gray=10x Green ≤1x

**Supplementary Table 3 | Plasmids and primers used for USER cloning of CypD mutant expression constructs.**

| <b>Mutation (plasmid name)</b>                   | <b>Starting plasmid</b> | <b>Primer (forward, reverse)</b>                                                 |
|--------------------------------------------------|-------------------------|----------------------------------------------------------------------------------|
| CypD K118A (2BT-CypD (45-207) K118A)             | 2BT-CypD (45-207)       | AGGCGGGGCG/ideoxyU/CCATCTACGGAAGCCGCTTTC<br>ACGCCCGCC/ideoxyU/GTGCCATTGTGGTTGGTG |
| CypD K118E (2BT-CypD (45-207) K118E)             | 2BT-CypD (45-207)       | AGGCGGGGAA/ideoxyU/CCATCTACGGAAGCCGCTTTC<br>ATTCCCGCC/ideoxyU/GTGCCATTGTGGTTGGTG |
| CypD S123E (2BT-CypD (45-207) S123E)             | 2BT-CypD (45-207)       | ACGGAGAACGC/ideoxyU/TTCCTGACGAGAACTTAC<br>AGCGTTCTCCG/ideoxyU/AGATGGACTTCCCG     |
| CypD R124A (2BT-CypD (45-207) R124A)             | 2BT-CypD (45-207)       | AGCGCGTTTCC/ideoxyU/GACGAGAACTTTACTGAAG<br>AGGAAACGCGC/ideoxyU/TCCGTAGATGGACTTCC |
| CypD R124K (2BT-CypD (45-207) R124K)             | 2BT-CypD (45-207)       | AGCAAATTTCC/ideoxyU/GACGAGAACTTTACTGAAG<br>AGGAAATTTGC/ideoxyU/TCCGTAGATGGACTTCC |
| CypD K118E/R124A (2BT-CypD (45-207) K118E/R124A) | 2BT-CypD-R124A (45-207) | AGCGCGTTTCC/ideoxyU/GACGAGAACTTTACTGAAG<br>AGGAAACGCGC/ideoxyU/TCCGTAGATGGATTCCC |

**Supplementary Table 4 | Plasmids and primers used for cloning of CypA, CypB, and CypE mutant expression constructs.**

| Mutation (plasmid name)                      | Starting plasmid          | Primer (forward, reverse)                                                                                 |
|----------------------------------------------|---------------------------|-----------------------------------------------------------------------------------------------------------|
| CypD K175I (2BT-CypD (45-207) K175I)         | 2BT-CypD (45-207)         | 5'-GTTCCGGTCACGTCATAGAGGGCATGGAC-3'<br>5'-GTCCATGCCCTCTATGACGTGACCGAAC-3'                                 |
| CypB E121S (2BT-CypB (34-216) E121S)         | 2BT-CypB (34-216)         | 5'-GGAAAGAGCATCTACGGTAGCCGCTTCCCCGATGAG-3'<br>5'-CTCATCGGGGAAGCGGCTACCGTAGATGCTCTTTCC-3'                  |
| CypA K82R (2BT-CypA (1-165) K82R)            | 2BT-CypA (1-165)          | 5'-GCAAGTCCATCTATGGGGAGCGCTTTGAAGATGAGAACTTCATCC-3'<br>5'-GGATGAAGTTCTCATCTTCAAAGCGCTCCCATAGATGGACTTGC-3' |
| CypA E81S/K82R (2BT-CypA (1-165) E81S/K82R)  | 2BT-CypA K82R (1-165)     | 5'-GCAAGTCCATCTATGGGGAGCGCTTTGAAGATGAGAACTTCATCC-3'<br>5'-GGATGAAGTTCTCATCTTCAAAGCGCTCCCATAGATGGACTTGC-3' |
| CypE K212A (pET28α LIC-CypE (131-301) K212A) | pET28α LIC-CypE (131-301) | 5'-CCACAATGGCACTGGGGGCGCGTCCATCTATGGGAAG-3'<br>5'-CGAACTTCTCCCATAGATGGACGCGCCCCAGTGCCATTG-3'              |
| CypE K217A (pET28α LIC-CypE (131-301) K217A) | pET28α LIC-CypE (131-301) | 5'-GGGCAAGTCCATCTATGGGGCGAAGTTTCGATGATG-3'<br>5'-GTTTTTCATCATCGAACTTCGCCCCATAGATGGAC-3'                   |
| CypE K218A (pET28α LIC-CypE (131-301) K218A) | pET28α LIC-CypE (131-301) | 5'-GCAAGTCCATCTATGGGAAGCGTTTCGATGATGAAAAC-3'<br>5'-GGATAAAGTTTTTCATCATCGAACGCTTCCCATAGATGG-3'             |



**Supplementary Table 5 | Plasmids used for recombinant expression of cyclophilin proteins.**

| <b>Expression plasmid</b>               | <b>Cyclophilin protein</b> |
|-----------------------------------------|----------------------------|
| 2BT-CypD (45-207)                       | CypD                       |
| 2BT-CypD (45-207) K118A                 | CypD K118A                 |
| 2BT-CypD (45-207) K118E                 | CypD K118E                 |
| 2BT-CypD (45-207) S123E                 | CypD S123E                 |
| 2BT-CypD (45-207) R124A                 | CypD R124A                 |
| 2BT-CypD (45-207) R124K                 | CypD R124K                 |
| 2BT-CypD (45-207) K118E/R124A           | CypD K118E/R124A           |
| 2BT-CypD (45-207) K175I                 | CypD K175I                 |
| 2BT-CypA (1-165)                        | CypA                       |
| 2BT-CypA (1-165) K82R                   | CypA K82R                  |
| 2BT-CypA (1-165) E81S/K82R              | CypA E81S/K82R             |
| 2BT-CypB (34-216)                       | CypB                       |
| 2BT-CypB (34-216) E121S                 | CypB E121S                 |
| pET28 $\alpha$ LIC-CypC (24-212)        | CypC                       |
| pET28 $\alpha$ LIC-CypE (131-301)       | CypE                       |
| pET28 $\alpha$ LIC-CypE (131-301) K212A | CypE K212A                 |
| pET28 $\alpha$ LIC-CypE (131-301) K217A | CypE K217A                 |
| pET28 $\alpha$ LIC-CypE (131-301) K218A | CypE K218A                 |
| pET28 $\alpha$ LIC-CypG (1-179)         | CypG                       |
| 2BT-CypH (1-177)                        | CypH                       |
| 2BT-Cyp40 (1-183)                       | Cyp40                      |
| pET28 $\alpha$ LIC-NKTR (7-179)         | NKTR                       |
| 2BT-PPIL1 (1-166)                       | PPIL1                      |
| pET28 $\alpha$ LIC-PPIL2 (280-457)      | PPIL2                      |
| 2BT-PPIL3 (1-161)                       | PPIL3                      |
| pET28 $\alpha$ LIC-PPWD1 (473-646)      | PPWD1                      |

**Supplementary Table 6 | Concentrations of cyclophilins used in competition anisotropy binding assay with A26-FI.**

| <b>Cyclophilin</b> | <b>Concentration (nM)</b> |
|--------------------|---------------------------|
| CypD               | 40                        |
| CypA               | 80                        |
| CypB               | 100                       |
| CypE               | 150                       |
| CypE K212A         | 150                       |
| CypE K217A         | 150                       |
| CypE K218A         | 150                       |
| Cyp40              | 300                       |
| PPIL1              | 600                       |
| PPIL3              | 2000                      |

**Supplementary Table 7 | High-resolution mass spectroscopy results for intermediates reported in this work.** Experiments and formula confirmation were performed by Harvard University's Center for Mass Spectroscopy.

| Compound ID | Molecular Formula                                               | Calculated [M+H] <sup>+</sup> | Found [M+H] <sup>+</sup> | Calculated Δ ppm |            |                                                                 |                                      |           |      |
|-------------|-----------------------------------------------------------------|-------------------------------|--------------------------|------------------|------------|-----------------------------------------------------------------|--------------------------------------|-----------|------|
| 4F          | C <sub>23</sub> H <sub>24</sub> N <sub>2</sub> O <sub>6</sub>   | 425.171                       | 425.1707                 | -0.7             | I19d       | C <sub>12</sub> H <sub>13</sub> BO <sub>5</sub>                 | 247.0783                             | 247.0782  | -0.4 |
| I1          | C <sub>21</sub> H <sub>19</sub> NO <sub>4</sub>                 | 348.1241                      | 348.1245                 | 1.1              | I19e       | C <sub>10</sub> H <sub>9</sub> BO <sub>5</sub>                  | 219.047                              | 219.0469  | -0.5 |
| I2          | C <sub>21</sub> H <sub>19</sub> NO <sub>4</sub>                 | 348.1241                      | 348.1245                 | 1.1              | I20a       | C <sub>12</sub> H <sub>11</sub> F <sub>3</sub> O <sub>6</sub> S | 341.0301                             | 341.0309  | 2.3  |
| I3          | C <sub>20</sub> H <sub>19</sub> NO <sub>4</sub>                 | 336.1241                      | 336.1246                 | 1.5              | I20b       | C <sub>17</sub> H <sub>23</sub> BO <sub>5</sub>                 | 341.1531                             | 341.1526  | -1.5 |
| I4          | C <sub>22</sub> H <sub>23</sub> NO <sub>4</sub>                 | 366.17                        | 366.1701                 | 0.3              | I20c       | C <sub>11</sub> H <sub>13</sub> BO <sub>5</sub>                 | 235.0783                             | 235.0783  | 0    |
| I5          | C <sub>29</sub> H <sub>24</sub> N <sub>2</sub> O <sub>4</sub>   | 465.1809                      | 465.1811                 | 0.4              | I20d       | C <sub>10</sub> H <sub>11</sub> BO <sub>5</sub>                 | 221.0627                             | 221.0626  | -0.5 |
| I6a         | C <sub>19</sub> H <sub>25</sub> BO <sub>4</sub>                 | 329.1919                      | 329.1921                 | 0.6              | I21a       | C <sub>16</sub> H <sub>21</sub> BO <sub>4</sub>                 | 287.146                              | 287.1463  | 1    |
| I6b         | C <sub>13</sub> H <sub>15</sub> BO <sub>4</sub>                 | 245.0991                      | 245.099                  | -0.4             | I21b       | C <sub>10</sub> H <sub>11</sub> BO <sub>4</sub>                 | 205.0678                             | 205.0676  | -1   |
| I7a         | C <sub>16</sub> H <sub>21</sub> BO <sub>5</sub>                 | 303.1409                      | 303.1411                 | 0.7              | I22a       | C <sub>16</sub> H <sub>20</sub> NO <sub>4</sub>                 | 324.1378                             | 324.138   | 0.6  |
| I7b         | C <sub>10</sub> H <sub>11</sub> BO <sub>5</sub>                 | 221.0627                      | 221.0625                 | -0.9             | I22b       | C <sub>10</sub> H <sub>10</sub> NO <sub>4</sub>                 | 218.063                              | 218.0628  | -0.9 |
| I8a         | C <sub>10</sub> H <sub>9</sub> BO <sub>5</sub>                  | 219.047                       | 219.0469                 | -0.5             | I22c       | C <sub>9</sub> H <sub>8</sub> NO <sub>4</sub>                   | 204.0474                             | 204.047   | -2   |
| I8b         | C <sub>9</sub> H <sub>7</sub> BO <sub>5</sub>                   | 205.0314                      | 205.031                  | -2               | I23        | C <sub>18</sub> H <sub>27</sub> BO <sub>6</sub>                 | 373.1793                             | 373.1792  | -0.3 |
| I9a         | C <sub>12</sub> H <sub>11</sub> F <sub>3</sub> O <sub>6</sub> S | 341.0301                      | 341.0304                 | 0.9              | I24a       | C <sub>19</sub> H <sub>27</sub> BrO <sub>4</sub>                | 421.0985                             | 421.0986  | 0.2  |
| I9b         | C <sub>17</sub> H <sub>23</sub> BO <sub>5</sub>                 | 341.1531                      | 341.1526                 | -1.5             | I24b       | C <sub>25</sub> H <sub>39</sub> BO <sub>6</sub>                 | 469.2732                             | 469.2732  | 0    |
| I9c         | C <sub>11</sub> H <sub>13</sub> BO <sub>5</sub>                 | 235.0783                      | 235.0783                 | 0                | I24c       | C <sub>19</sub> H <sub>29</sub> BO <sub>6</sub>                 | 387.1949                             | 387.1949  | 0    |
| I9d         | C <sub>10</sub> H <sub>11</sub> BO <sub>5</sub>                 | 221.0627                      | 221.0626                 | -0.5             | I25a       | C <sub>23</sub> H <sub>26</sub> BrNO <sub>5</sub>               | 476.1067                             | 476.1067  | 0    |
| I10         | C <sub>9</sub> H <sub>8</sub> NO <sub>4</sub>                   | 204.0474                      | 204.047                  | -2               | I25b       | C <sub>32</sub> H <sub>26</sub> BrNO <sub>5</sub>               | 606.0887                             | 606.088   | -1.2 |
| I11         | C <sub>14</sub> H <sub>17</sub> BO <sub>5</sub>                 | 275.1096                      | 275.1098                 | 0.7              | I25c       | C <sub>47</sub> H <sub>49</sub> BrNeO <sub>7</sub>              | 911.2738<br>(Na <sup>+</sup> adduct) | 911.2718  | -2.2 |
| I12a        | C <sub>16</sub> H <sub>23</sub> BO <sub>4</sub>                 | 289.1617                      | 289.1619                 | 0.7              | I26a       | C <sub>23</sub> H <sub>26</sub> BrNO <sub>5</sub>               | 476.1067                             | 476.1061  | -1.3 |
| I12b        | C <sub>10</sub> H <sub>13</sub> BO <sub>4</sub>                 | 207.0834                      | 207.0832                 | -1               | I26b       | C <sub>32</sub> H <sub>26</sub> BrNO <sub>5</sub>               | 606.0887                             | 606.0877  | -1.6 |
| I13a        | C <sub>16</sub> H <sub>21</sub> BO <sub>4</sub>                 | 287.146                       | 287.1461                 | 0.3              | I26c       | C <sub>47</sub> H <sub>49</sub> BrNeO <sub>7</sub>              | 911.2738<br>(Na <sup>+</sup> adduct) | 911.2715  | -2.5 |
| I13b        | C <sub>16</sub> H <sub>21</sub> BO <sub>4</sub>                 | 205.0678                      | 205.0675                 | -1.5             | I27a       | C <sub>22</sub> H <sub>24</sub> BrNO <sub>5</sub>               | 484.073                              | 484.0728  | -0.4 |
| I14a        | C <sub>12</sub> H <sub>15</sub> BrO <sub>4</sub> S              | 356.9767                      | 356.9769                 | 0.6              | I27b       | C <sub>31</sub> H <sub>24</sub> BrNO <sub>5</sub>               | 592.073                              | 592.0724  | -1   |
| I14b        | C <sub>18</sub> H <sub>27</sub> BO <sub>6</sub> S               | 405.1514                      | 405.1512                 | -0.5             | I27c       | C <sub>46</sub> H <sub>47</sub> BrNeO <sub>7</sub>              | 875.2762                             | 875.2757  | -0.6 |
| I14c        | C <sub>12</sub> H <sub>17</sub> BO <sub>6</sub> S               | 323.0731                      | 323.0734                 | 0.9              | I28a       | C <sub>22</sub> H <sub>24</sub> BrNO <sub>5</sub>               | 484.073                              | 484.0725  | -1   |
| I15a        | C <sub>11</sub> H <sub>11</sub> F <sub>3</sub> O <sub>6</sub> S | 351.0121                      | 351.0124                 | 0.9              | I28b       | C <sub>31</sub> H <sub>24</sub> BrNO <sub>5</sub>               | 592.073                              | 592.0727  | -0.5 |
| I15b        | C <sub>16</sub> H <sub>23</sub> BO <sub>5</sub>                 | 329.1531                      | 329.1531                 | 0                | I28c       | C <sub>46</sub> H <sub>47</sub> BrNeO <sub>7</sub>              | 875.2762                             | 875.2753  | -1   |
| I15c        | C <sub>10</sub> H <sub>13</sub> BO <sub>5</sub>                 | 223.0783                      | 223.0782                 | -0.4             | I29a       | C <sub>20</sub> H <sub>29</sub> BO <sub>6</sub>                 | 399.1949                             | 399.1951  | 0.5  |
| I15d        | C <sub>9</sub> H <sub>11</sub> BO <sub>5</sub>                  | 209.0627                      | 209.0624                 | -1.4             | I29b       | C <sub>14</sub> H <sub>19</sub> BO <sub>6</sub>                 | 317.1167                             | 317.117   | 0.9  |
| I16a        | C <sub>15</sub> H <sub>21</sub> BO <sub>5</sub>                 | 291.1409                      | 291.1413                 | 1.4              | I30a       | C <sub>15</sub> H <sub>19</sub> BrO <sub>4</sub>                | 365.0359                             | 365.0359  | 0.0  |
| I16b        | C <sub>9</sub> H <sub>11</sub> BO <sub>5</sub>                  | 209.0627                      | 209.0624                 | -1.4             | I30b       | C <sub>21</sub> H <sub>31</sub> BO <sub>6</sub>                 | 413.2106                             | 413.2106  | 0.0  |
| I17a        | C <sub>11</sub> H <sub>9</sub> BrO <sub>3</sub>                 | 268.9808                      | 268.9809                 | 0.4              | I30c       | C <sub>16</sub> H <sub>21</sub> BO <sub>6</sub>                 | 331.1323                             | 331.1327  | 1.2  |
| I17b        | C <sub>17</sub> H <sub>21</sub> BO <sub>5</sub>                 | 317.1555                      | 317.1558                 | 0.9              | (4Br)B6    | C <sub>43</sub> H <sub>52</sub> BrN <sub>7</sub> O <sub>7</sub> | 858.3184                             | 858.3193  | 1    |
| I17c        | C <sub>11</sub> H <sub>11</sub> BO <sub>5</sub>                 | 235.0772                      | 235.0768                 | -1.7             | (4Br)B6-A  | C <sub>39</sub> H <sub>43</sub> BrNeO <sub>6</sub>              | 771.25                               | 771.25    | 0    |
| I17d        | C <sub>9</sub> H <sub>7</sub> BO <sub>5</sub>                   | 205.0314                      | 205.0311                 | -1.5             | (4Br)B6-B  | C <sub>41</sub> H <sub>48</sub> BrN <sub>7</sub> O <sub>6</sub> | 814.2922                             | 814.2908  | -1.7 |
| I18a        | C <sub>17</sub> H <sub>21</sub> BO <sub>5</sub>                 | 317.1555                      | 317.1557                 | 0.6              | (4Br)B6-FI | C <sub>39</sub> H <sub>43</sub> BrNeO <sub>6</sub>              | 1332.4499                            | 1332.4489 | -0.8 |
| I18b        | C <sub>11</sub> H <sub>11</sub> BO <sub>5</sub>                 | 235.0772                      | 235.0766                 | -2.6             | *(4Br)B6-A | C <sub>39</sub> H <sub>43</sub> BrNeO <sub>6</sub>              | 771.25                               | 771.25    | 0    |
| I18c        | C <sub>9</sub> H <sub>7</sub> BO <sub>5</sub>                   | 205.0314                      | 205.0311                 | -1.5             | *(4Br)B6-B | C <sub>41</sub> H <sub>48</sub> BrN <sub>7</sub> O <sub>6</sub> | 814.2922                             | 814.291   | -1.5 |
| I19a        | C <sub>12</sub> H <sub>12</sub> O <sub>4</sub>                  | 221.0808                      | 221.081                  | 0.9              |            |                                                                 |                                      |           |      |
| I19b        | C <sub>13</sub> H <sub>11</sub> F <sub>3</sub> O <sub>6</sub> S | 375.0121                      | 375.0123                 | 0.5              |            |                                                                 |                                      |           |      |
| I19c        | C <sub>18</sub> H <sub>23</sub> BO <sub>5</sub>                 | 353.1531                      | 353.1532                 | 0.3              |            |                                                                 |                                      |           |      |

**Supplementary Table 8 | High-resolution mass spectroscopy results for macrocycles reported in this work.** Experiments and formula confirmation were performed by Harvard University's Center for Mass Spectroscopy.

| Compound ID | Molecular Formula | Calculated [M+H] <sup>+</sup> | Found [M+H] <sup>+</sup> | Calculated Δ ppm |             |               |           |           |      |
|-------------|-------------------|-------------------------------|--------------------------|------------------|-------------|---------------|-----------|-----------|------|
| JOMbT       | C34H45N7O8        | 680.3402                      | 680.3398                 | -0.6             | B14         | C51H57N7O8    | 896.4341  | 896.4343  | 0.2  |
| JOMbC       | C34H45N7O8        | 680.3402                      | 680.3404                 | 0.3              | B15         | C51H59N7O8    | 898.4498  | 898.4497  | -0.1 |
| JOMbT-A     | C30H36N6O7        | 593.2718                      | 593.2721                 | 0.5              | B16         | C49H56N8O9    | 901.4243  | 901.4237  | -0.7 |
| JOMbT-D     | C40H57N7O10       | 796.424                       | 796.4238                 | -0.3             | B17         | C51H59N7O9    | 914.4447  | 914.4448  | 0.1  |
| JOBBt       | C35H47N7O8        | 694.3559                      | 694.3556                 | -0.4             | B18         | C50H58N8O8    | 899.445   | 899.4453  | 0.3  |
| JOBBc-A     | C31H38N6O7        | 607.2875                      | 607.2874                 | -0.2             | B19         | C50H59N7O9S   | 934.4168  | 934.4166  | -0.2 |
| JOGAt       | C34H45N7O8        | 680.3402                      | 680.3403                 | 0.1              | B20         | C50H57N7O9    | 900.4291  | 900.4289  | -0.2 |
| JOGAc       | C34H45N7O8        | 680.3402                      | 680.3405                 | 0.4              | B21         | C51H59N7O9    | 914.4447  | 914.4443  | -0.4 |
| JOGbT-A     | C31H38N6O7        | 607.2875                      | 607.2875                 | 0                | B22         | C51H59N7O9    | 914.4447  | 914.4448  | 0.1  |
| JOGbC-A     | C31H38N6O7        | 607.2875                      | 607.2876                 | 0.2              | B23         | C52H61N7O9    | 928.4604  | 928.4604  | 0    |
| JOCbT       | C34H45N7O8        | 680.3402                      | 680.3402                 | 0                | B24         | C52H59N7O9    | 926.4447  | 926.445   | 0.3  |
| JOCbC       | C34H45N7O8        | 680.3402                      | 680.3403                 | 0.1              | B25         | C52H57N7O9    | 924.4291  | 924.4295  | 0.4  |
| JOMAt       | C33H43N7O8        | 666.3246                      | 666.324                  | -0.9             | B26         | C52H61N7O9    | 928.4604  | 928.4607  | 0.3  |
| JOMAc       | C33H43N7O8        | 666.3246                      | 666.3246                 | 0                | B27         | C53H63N7O9    | 942.476   | 942.4762  | 0.2  |
| JOMCt       | C35H47N7O         | 694.3559                      | 694.3559                 | 0                | B28         | C53H63N7O9    | 942.476   | 942.4754  | -0.6 |
| JOMCc       | C35H47N7O         | 694.3559                      | 694.356                  | 0.1              | B29         | C54H65N7O9    | 956.4917  | 956.4918  | 0.1  |
| JOMFt       | C34H45N7O8        | 680.3402                      | 680.3403                 | 0.1              | B30         | C51H60N8O9    | 929.4556  | 929.4558  | 0.2  |
| JOMFc       | C34H45N7O8        | 680.3402                      | 680.3399                 | -0.4             | B31         | C51H62N8O7    | 899.4814  | 899.4813  | -0.1 |
| HOJjT       | C37H51N7O8        | 722.3872                      | 722.387                  | -0.3             | B32         | C52H64N8O7    | 913.4971  | 913.4974  | 0.3  |
| HOJjC       | C37H51N7O8        | 722.3872                      | 722.3867                 | -0.7             | B33         | C50H56N8O7    | 881.4345  | 881.4344  | -0.1 |
| HJJjT       | C39H59N7O7        | 738.4549                      | 738.4544                 | -0.7             | B34         | C51H58N8O7    | 895.4501  | 895.4499  | -0.2 |
| HJJjC       | C39H59N7O7        | 738.4549                      | 738.4543                 | -0.8             | B35         | C53H61N7O10   | 956.4553  | 956.4552  | -0.1 |
| A1          | C33H43N7O8        | 666.3246                      | 666.3246                 | 0.0              | B36         | C52H57N7O10   | 940.424   | 940.4244  | 0.4  |
| A2          | C33H43N7O8        | 666.3246                      | 666.3244                 | -0.3             | B37         | C53H61N7O10   | 956.4553  | 956.4553  | 0    |
| A3          | C30H45N7O8        | 632.3402                      | 632.3404                 | 0.3              | B38         | C51H59N7O10   | 930.4396  | 930.4401  | 0.5  |
| A4          | C31H43N7O8        | 642.3246                      | 642.3245                 | -0.2             | B39         | C52H58N8O9    | 939.44    | 939.4404  | 0.4  |
| A5          | C31H43N7O8        | 642.3246                      | 642.3245                 | -0.2             | B40         | C51H57N7O10   | 928.424   | 928.4243  | 0.3  |
| A6          | C32H41N7O8        | 652.3089                      | 652.3088                 | -0.2             | B41         | C53H63N7O9    | 942.476   | 942.476   | 0    |
| A7          | C34H45N7O8        | 680.3402                      | 680.3401                 | -0.1             | B42         | C53H61N7O9    | 940.4604  | 940.4605  | 0.1  |
| A8          | C30H43N7O7        | 614.3297                      | 614.3295                 | -0.3             | B43         | C51H59N7O11S  | 978.4066  | 978.4062  | -0.4 |
| A9          | C36H47N7O7        | 690.361                       | 690.3608                 | -0.3             | B44         | C52H61N7O10   | 944.4553  | 944.4553  | 0    |
| A10         | C33H49N7O7        | 656.3766                      | 656.3765                 | -0.2             | B45         | C52H61N7O10   | 944.4553  | 944.456   | 0.7  |
| A11         | C38H49N7O7        | 716.3766                      | 716.3763                 | -0.4             | B46         | C52H57N7O10   | 940.424   | 940.424   | 0    |
| A12         | C36H53N7O7        | 696.4079                      | 696.4075                 | -0.6             | B47         | C52H57N7O10   | 940.424   | 940.4243  | 0.3  |
| A13         | C40H49N7O7        | 740.3766                      | 740.3767                 | 0.1              | B48         | C53H59N7O10   | 954.4396  | 954.4397  | 0.1  |
| A14         | C43H51N7O8        | 794.3872                      | 794.3872                 | 0.0              | B49         | C53H61N7O10   | 956.4553  | 956.455   | -0.3 |
| A15         | C42H51N7O7        | 766.3923                      | 766.3921                 | -0.3             | B50         | C53H61N7O9    | 940.4604  | 940.4606  | 0.2  |
| A16         | C37H49N7O7        | 704.3766                      | 704.3762                 | -0.6             | B51         | C52H58N8O9    | 939.44    | 939.4401  | 0.1  |
| A17         | C34H45N7O7S       | 696.3174                      | 696.3174                 | 0.0              | B52         | C53H61N7O11   | 972.4502  | 972.4488  | -1.4 |
| A18         | C37H49N7O7        | 704.3766                      | 704.3764                 | -0.3             | B53         | C54H63N7O11   | 986.4658  | 986.4653  | -0.5 |
| A19         | C37H49N7O7        | 704.3766                      | 704.3763                 | -0.4             | A26-FI      | C68H73N7O16   | 1244.5187 | 1244.5199 | 1    |
| A20         | C40H55N7O7        | 746.4236                      | 746.4234                 | -0.3             | B52-FI      | C80H83N7O19   | 1446.5816 | 1446.5822 | 0.4  |
| A21         | C34H45N7O8        | 680.3402                      | 680.3402                 | 0.0              | B53-FI      | C81H85N7O19   | 1460.5973 | 1460.5986 | 0.9  |
| A22         | C35H47N7O8        | 694.3559                      | 694.3556                 | -0.4             | B52-A       | C49H52N6O10   | 885.3818  | 885.3819  | 0.1  |
| A23         | C34H45N7O8        | 680.3402                      | 680.3404                 | 0.3              | B53-A       | C50H54N6O10   | 899.3974  | 899.3976  | 0.2  |
| A24         | C33H43N7O8        | 666.3246                      | 666.3244                 | -0.3             | *B52-A      | C49H52N6O10   | 885.3818  | 885.3822  | 0.5  |
| A25         | C35H47N7O8        | 694.3559                      | 694.3557                 | -0.3             | *B53-A      | C50H54N6O10   | 899.3974  | 899.3978  | 0.4  |
| A26         | C41H51N7O8        | 770.3872                      | 770.3866                 | -0.8             | C1A         | C47H51BN6O9   | 855.3883  | 855.3872  | -1.7 |
| A27         | C35H47N7O8        | 694.3559                      | 694.3554                 | -0.7             | C2A         | C47H51BN6O9   | 855.3883  | 855.3878  | -1.5 |
| A28         | C35H47N7O8        | 694.3559                      | 694.3557                 | -0.3             | C3A         | C46H49BN6O9   | 841.3727  | 841.3725  | -0.2 |
| A29         | C35H47N7O8        | 694.3559                      | 694.3551                 | -1.2             | C4A         | C46H49BN6O9   | 841.3727  | 841.3726  | -0.1 |
| A30         | C34H47N7O8        | 682.3559                      | 682.3559                 | 0.0              | C5A         | C46H48N6O7    | 797.3657  | 797.3643  | -1.8 |
| B1          | C50H57N7O8        | 884.4341                      | 884.4338                 | -0.3             | C6A         | C45H49BN6O8   | 813.37789 | 813.3779  | 0    |
| B2          | C49H57N7O7        | 856.4392                      | 856.4383                 | -1.1             | B52-Cy5     | C83H94N9O11+  | 1392.7067 | 1392.7074 | 0.5  |
| B3          | C44H55N7O         | 794.4236                      | 794.423                  | -0.8             | B53-Cy5     | C84H96N9O11+  | 1406.7224 | 1406.72   | -1.7 |
| B4          | C45H55N7O7        | 806.4236                      | 806.4234                 | -0.2             | *B52-Cy5    | C83H94N9O11+  | 1392.7067 | 1392.7048 | -1.4 |
| B5          | C47H61N7O7        | 836.4705                      | 836.4704                 | -0.1             | *B53-Cy5    | C84H96N9O11+  | 1406.7224 | 1406.72   | -1.7 |
| B6          | C43H53N7O7        | 780.4079                      | 780.4075                 | -0.5             | B52-Et-Cy5  | C87H102N9O11+ | 1448.7693 | 1448.7652 | -2.8 |
| B7          | C43H53N7O8        | 796.4028                      | 796.4021                 | -0.9             | B53-Et-Cy5  | C88H104N9O11+ | 1462.785  | 1462.7824 | -1.8 |
| B8          | C50H59N7O7        | 870.4549                      | 870.4546                 | -0.3             | *B52-Et-Cy5 | C87H102N9O11+ | 1448.7693 | 1448.7672 | -1.4 |
| B9          | C50H59N7O7        | 870.4549                      | 870.4546                 | -0.3             | *B53-Et-Cy5 | C88H104N9O11+ | 1462.785  | 1462.7844 | -0.4 |
| B10         | C50H59N7O8        | 886.4498                      | 886.45                   | 0.2              | Cy5-enAc    | C36H47N4O2+   | 567.3694  | 567.3687  | -1.2 |
| B11         | C51H59N7O8        | 898.4498                      | 898.4495                 | -0.3             |             |               |           |           |      |
| B12         | C49H57N7O8        | 872.4341                      | 872.4341                 | 0                |             |               |           |           |      |
| B13         | C48H56N6O7        | 857.4345                      | 857.4343                 | -0.2             |             |               |           |           |      |

**Supplementary Table 9 | Crystal diffraction statistics for all CypD-inhibitor co-crystal structures reported in this work. Statistics for the highest-resolution shell are shown in parentheses.**

|                                       | CypD + JOMBt                                   | CypD + A26                               | CypD + B1                                      | CypD + B2                               | CypD + B3                                      | CypD + B21                        | CypD + B23                                     | CypD + B25                                     | CypD + B52                                     | CypD + B53                                     |
|---------------------------------------|------------------------------------------------|------------------------------------------|------------------------------------------------|-----------------------------------------|------------------------------------------------|-----------------------------------|------------------------------------------------|------------------------------------------------|------------------------------------------------|------------------------------------------------|
| <b>Wavelength</b>                     | 0.97933 Å                                      | 0.97933 Å                                | 0.97933 Å                                      | 0.97933 Å                               | 0.97933 Å                                      | 0.92016 Å                         | 0.97931 Å                                      | 0.92011 Å                                      | 0.92011 Å                                      | 0.92011 Å                                      |
| <b>Resolution range</b>               | 46.482 - 1.746<br>(1.776 - 1.746)              | 37.923 - 1.055<br>(1.073 - 1.055)        | 44.534 - 1.211<br>(1.232 - 1.211)              | 37.700 - 1.461<br>(1.486 - 1.461)       | 44.684 - 1.522<br>(1.549 - 1.522)              | 30.96 - 0.97<br>(1.000 - 0.97)    | 25.72 - 1.18<br>(1.21 - 1.18)*                 | 25.83 - 1.572<br>(1.61 - 1.572)                | 25.73 - 1.16<br>(1.19 - 1.16)                  | 25.68 - 1.104<br>(1.143 - 1.104)               |
| <b>Space group</b>                    | P 2 <sub>1</sub> 2 <sub>1</sub> 2 <sub>1</sub> | P 1 2 <sub>1</sub> 1                     | P 2 <sub>1</sub> 2 <sub>1</sub> 2 <sub>1</sub> | P 1 2 <sub>1</sub> 1                    | P 2 <sub>1</sub> 2 <sub>1</sub> 2 <sub>1</sub> | P 4 <sub>3</sub>                  | P 2 <sub>1</sub> 2 <sub>1</sub> 2 <sub>1</sub> | P 2 <sub>1</sub> 2 <sub>1</sub> 2 <sub>1</sub> | P 2 <sub>1</sub> 2 <sub>1</sub> 2 <sub>1</sub> | P 2 <sub>1</sub> 2 <sub>1</sub> 2 <sub>1</sub> |
| <b>Unit cell</b>                      | 38.505 57.879<br>78.01 90.90 90                | 36.061 67.087<br>38.662 90<br>101.218 90 | 40.195 60.141<br>66.264 90 90<br>90            | 35.838 67.41<br>38.455 90<br>101.371 90 | 40.279 60.265<br>66.592 90 90 90               | 38.632 38.632<br>103.509 90 90 90 | 38.542 67.177<br>69.071 90 90 90               | 38.564 67.19<br>69.58 90 90 90                 | 38.408 67.032<br>69.324 90 90<br>90            | 38.492 66.885<br>68.968 90 90<br>90            |
| <b>Total reflections</b>              | 219423 (11765)                                 | 495647 (7380)                            | 470396 (2064)                                  | 138577 (7413)                           | 302677 (16985)                                 | 1028544 (9410)                    | 528630 (783)                                   | 196553 (168)                                   | 804168<br>(37928)                              | 934857<br>(53061)                              |
| <b>Unique reflections</b>             | 17266 (869)                                    | 78970 (2430)                             | 43493 (799)                                    | 31004 (1557)                            | 25507 (1301)                                   | 82203 (2612)                      | 46222 (393)                                    | 18407 (161)                                    | 62319 (4063)                                   | 71217 (4690)                                   |
| <b>Multiplicity</b>                   | 12.7 (13.5)                                    | 6.3 (3.0)                                | 10.8 (2.6)                                     | 4.5 (4.8)                               | 11.9 (13.1)                                    | 12.5 (3.6)                        | 11.4 (2.0)                                     | 10.7 (1.0)                                     | 12.9 (9.3)                                     | 13.1 (11.3)                                    |
| <b>Completeness (%)</b>               | 94.2 (99.9)                                    | 95.5 (59.6)                              | 87.8 (33.4)                                    | 99.70 (99.8)                            | 99.9 (100.0)                                   | 92.15 (61.6)                      | 76.6 (9.1)                                     | 71.1 (8.7)                                     | 99.0 (88.5)                                    | 98.6 (89.1)                                    |
| <b>Mean I/sigma(I)</b>                | 12.5 (2.3)                                     | 15.03 (2.3)                              | 23.0 (2.1)                                     | 9.9 (3.8)                               | 9.1 (3.2)                                      | 13.1 (0.9)                        | 19.00 (1.80)                                   | 33.70 (5.30)                                   | 13.50 (2.90)                                   | 9.60 (3.00)                                    |
| <b>Wilson B-factor</b>                |                                                | 19.17                                    | 9.05                                           | 11.42                                   | 9.55                                           | 13.97                             | 7.71                                           | 9.38                                           | 9.58                                           | 9.65                                           |
| <b>R-merge</b>                        | 0.136 (1.195)                                  | 0.057 (0.461)                            | 0.051 (0.428)                                  | 0.116 (1.046)                           | 0.165 (1.607)                                  | 0.107 (1.364)                     | 0.078 (0.508)                                  | 0.056 (0.035)                                  | 0.112 (0.595)                                  | 0.180 (0.596)                                  |
| <b>R-meas</b>                         | 0.142 (1.241)                                  | 0.062 (0.558)                            | 0.053 (0.538)                                  | 0.131 (1.167)                           | 0.173 (1.671)                                  | 0.112 (1.615)                     | 0.02682<br>(0.1685)                            | 0.01992<br>(0.06542)                           | 0.03362<br>(0.2297)                            | 0.0529<br>(0.2299)                             |
| <b>R-pim</b>                          | 0.040 (0.333)                                  | 0.024 (0.307)                            | 0.015 (0.317)                                  | 0.060 (0.507)                           | 0.050 (0.456)                                  | 0.029 (0.828)                     | 0.01896<br>(0.1192)                            | 0.01409<br>(0.04626)                           | 0.02377<br>(0.1625)                            | 0.0374<br>(0.1625)                             |
| <b>CC1/2</b>                          | 0.996 (0.772)                                  | 0.999 (0.798)                            | 1 (0.766)                                      | 0.994 (0.574)                           | 0.996 (0.911)                                  | 0.997 (0.241)                     | 0.998 (0.803)                                  | 0.998 (0.963)                                  | 0.995 (0.921)                                  | 0.994 (0.888)                                  |
| <b>CC*</b>                            | 0.999 (0.954)                                  | 1 (0.961)                                | 1 (0.951)                                      | 0.998 (0.91)                            | 0.999 (0.98)                                   | 0.999 (0.635)                     | 1 (0.987)                                      | 1 (0.997)                                      | 1 (0.987)                                      | 0.999 (0.98)                                   |
| <b>Reflections used in refinement</b> | 17146 (1755)                                   | 78345 (5507)                             | 43488 (1922)                                   | 30862 (3055)                            | 25407 (2507)                                   | 82203 (4868)                      | 42114 (2767)                                   | 18375 (288)                                    | 62243 (5800)                                   | 71160 (6445)                                   |
| <b>Reflections used for R-free</b>    | 848 (80)                                       | 3807 (270)                               | 2108 (103)                                     | 1531 (157)<br>0.1654                    | 1275 (117)                                     | 1997 (108)                        | 1831 (120)                                     | 1826 (27)<br>0.1339                            | 2011 (188)<br>0.1357                           | 1998 (186)<br>0.1369                           |
| <b>R-work</b>                         | 0.1702 (0.1894)                                | 0.1364 (0.2102)                          | 0.1513 (0.2112)                                | 0.1734<br>(0.1734)                      | 0.1690 (0.2280)                                | 0.1365 (0.3333)                   | 0.1350 (0.1812)                                | 0.1678<br>(0.1678)                             | 0.1795<br>(0.1795)                             | 0.1698<br>(0.1698)                             |
| <b>R-free</b>                         | 0.1842 (0.2096)                                | 0.1447 (0.2210)                          | 0.1604 (0.2189)                                | 0.1786<br>(0.1975)                      | 0.1886 (0.2689)                                | 0.1519 (0.3275)                   | 0.1473 (0.1933)                                | 0.1635<br>(0.2256)                             | 0.1516<br>(0.1875)                             | 0.1477<br>(0.1917)                             |
| <b>CC(work)</b>                       | 0.946 (0.932)                                  | 0.974 (0.915)                            | 0.969 (0.896)                                  | 0.962 (0.935)                           | 0.962 (0.923)                                  | 0.978 (0.650)                     | 0.972 (0.927)                                  | 0.966 (0.946)                                  | 0.969 (0.955)                                  | 0.970 (0.940)                                  |
| <b>CC(free)</b>                       | 0.946 (0.892)                                  | 0.977 (0.931)                            | 0.956 (0.909)                                  | 0.952 (0.922)                           | 0.952 (0.929)                                  | 0.983 (0.689)                     | 0.967 (0.915)                                  | 0.949 (0.821)                                  | 0.952 (0.960)                                  | 0.955 (0.940)                                  |
| <b>Number of non-hydrogen atoms</b>   |                                                | 1387                                     | 1570                                           | 1462                                    | 1454                                           | 1524                              | 1539                                           | 1557                                           | 1555                                           | 1479                                           |
| <b>macromolecules</b>                 |                                                | 1248                                     | 1258                                           | 1270                                    | 1279                                           | 1275                              | 1277                                           | 1269                                           | 1244                                           | 1244                                           |
| <b>ligands</b>                        |                                                | 49                                       | 56                                             | 65                                      | 63                                             | 58                                | 67                                             | 68                                             | 68                                             | 71                                             |
| <b>solvent</b>                        |                                                | 90                                       | 256                                            | 127                                     | 112                                            | 191                               | 195                                            | 220                                            | 243                                            | 164                                            |
| <b>Protein residues</b>               |                                                | 163                                      | 163                                            | 163                                     | 163                                            | 163                               | 163                                            | 163                                            | 163                                            | 163                                            |
| <b>RMS(bonds)</b>                     |                                                | 0.007                                    | 0.007                                          | 0.008                                   | 0.012                                          | 0.008                             | 0.012                                          | 0.009                                          | 0.007                                          | 0.011                                          |
| <b>RMS(angles)</b>                    |                                                | 0.99                                     | 1.04                                           | 1.08                                    | 1.51                                           | 1.299                             | 1.28                                           | 1.2                                            | 1.062                                          | 1.327                                          |
| <b>Ramachandran favored (%)</b>       |                                                | 96.3                                     | 95.68                                          | 95.65                                   | 95.68                                          | 96.32                             | 96.89                                          | 95.65                                          | 95.65                                          | 95.03                                          |
| <b>Ramachandran allowed (%)</b>       |                                                | 3.7                                      | 4.32                                           | 4.35                                    | 4.32                                           | 3.68                              | 3.11                                           | 4.35                                           | 4.35                                           | 4.97                                           |
| <b>Ramachandran outliers (%)</b>      |                                                | 0                                        | 0                                              | 0                                       | 0                                              | 0                                 | 0                                              | 0                                              | 0                                              | 0                                              |
| <b>Rotamer outliers (%)</b>           |                                                | 0                                        | 0                                              | 0                                       | 0.72                                           | 1.44                              | 0.71                                           | 0                                              | 0                                              | 0                                              |
| <b>Clashscore</b>                     |                                                | 1.18                                     | 0                                              | 0.77                                    | 0                                              | 2.31                              | 2.68                                           | 1.14                                           | 1.57                                           | 2.35                                           |
| <b>Average B-factor</b>               |                                                | 22.3                                     | 12.17                                          | 15.3                                    | 12.06                                          | 18.44                             | 10.72                                          | 12.77                                          | 13.25                                          | 12.43                                          |
| <b>macromolecules</b>                 |                                                | 21.31                                    | 9.54                                           | 14.69                                   | 11.39                                          | 16.8                              | 9.09                                           | 10.43                                          | 10.64                                          | 10.56                                          |
| <b>ligands</b>                        |                                                | 25.97                                    | 12.59                                          | 14.13                                   | 12.8                                           | 19.38                             | 9.61                                           | 11.32                                          | 12.01                                          | 11.04                                          |
| <b>solvent</b>                        |                                                | 33.89                                    | 24.99                                          | 21.98                                   | 19.23                                          | 29.13                             | 21.78                                          | 26.7                                           | 26.97                                          | 27.18                                          |
| <b>Number of TLS groups</b>           |                                                | 8                                        | 10                                             | 7                                       | 8                                              | 9                                 | 9                                              | 9                                              | 7                                              | 9                                              |

\*Data was collected to 1.18 Å resolution but cut off for refinement to 1.3 Å resolution to improve completeness.

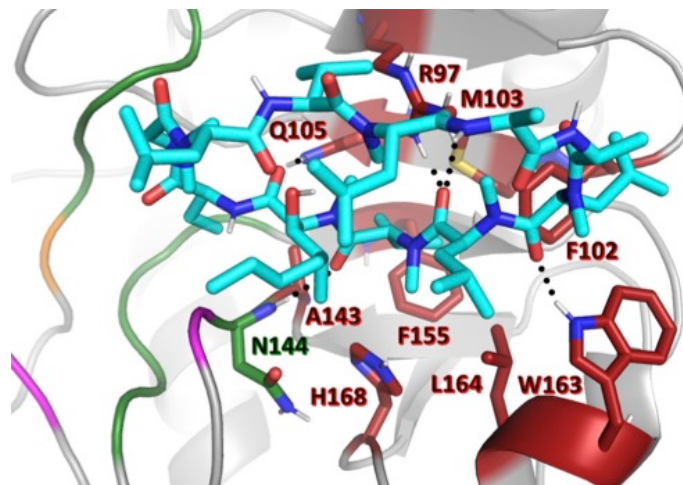

**Supplementary Figure 1 | Cyclosporine A interactions with active site residues of CypD** (PDB ID 2Z6W). CsA makes primary contacts with active site residues (red) and minimally interacts with S2 pocket residues (green, magenta, orange), with the exception of N144 which lies at the interface between the two pockets. Primary hydrophobic interactions are between Val on CsA and F155 at the base of the active site pocket, surrounded by M103, L164 and H168. Predicted hydrogen bond contacts with CypD residues (black dashes) are shown with R97, Q105, N144, and W163. These residues are highly conserved between isoforms, contributing to the promiscuous cyclophilin inhibition by CsA (Extended Data 1c).

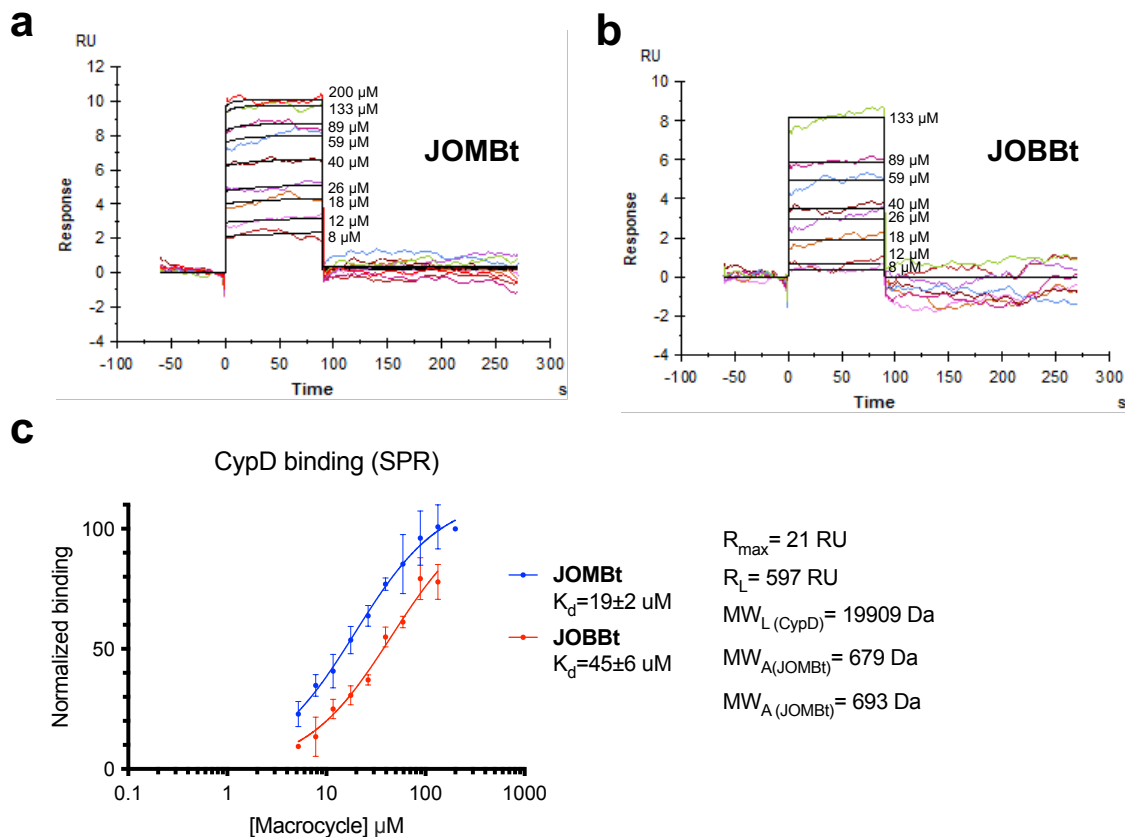

**Supplementary Figure 2 | Surface plasmon resonance measurement of JOMBt and JOBBt binding to immobilized CypD.** Representative sensorgram of **a**, JOMBt and **b**, JOBBt, flowed over amine immobilized CypD. Black lines are calculated kinetic fits for each dose. **c**, Binding dose response of JOMBt and JOBBt, where sensorgram RU values were normalized to DMSO treated baseline and 200  $\mu$ M JOMBt. Individual replicates represent fitted kinetic RU value during compound administration at each dose. Shown are SPR parameters including theoretical  $R_{max}$ , based off amount of immobilized CypD ( $R_L$ ) and molecular weights of assayed material ( $MW_{L(CypD)}$ ,  $MW_{A(JOMBt)}$ ,  $MW_{A(JOMBt)}$ ).  $K_d$  values reflect mean $\pm$ SEM of three technical replicates. Data points and error bars reflect mean $\pm$ SD of individual assays at one dose.

**a**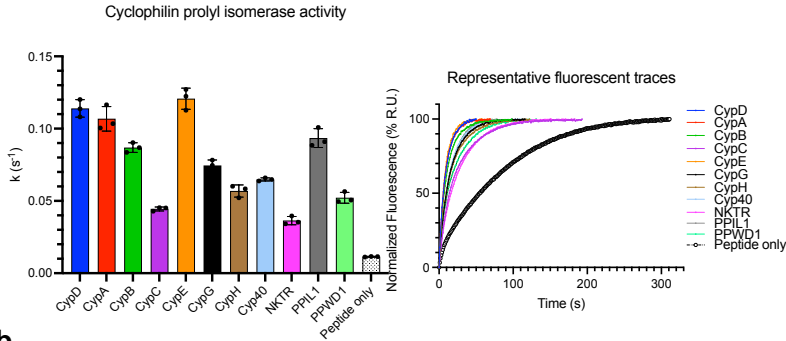

| Cyclophilin  | Prolyl-isomerization rate constant ( $k$ , $s^{-1}$ ) | Signal/Background | Z' Factor |
|--------------|-------------------------------------------------------|-------------------|-----------|
| CypD         | 0.114±0.006                                           | 10.4              | 0.82      |
| CypA         | 0.107±0.009                                           | 9.7               | 0.71      |
| CypB         | 0.087±0.003                                           | 7.9               | 0.87      |
| CypC         | 0.044±0.001                                           | 4                 | 0.89      |
| CypE         | 0.121±0.007                                           | 11                | 0.80      |
| CypG         | 0.074±0.004                                           | 6.7               | 0.80      |
| CypH         | 0.057±0.004                                           | 5.2               | 0.73      |
| CypM0        | 0.065±0.001                                           | 5.9               | 0.93      |
| NKTR         | 0.036±0.003                                           | 3.3               | 0.62      |
| PPIL1        | 0.093±0.007                                           | 8.5               | 0.74      |
| PPWD1        | 0.052±0.004                                           | 4.7               | 0.69      |
| Peptide only | 0.0110±0.0002                                         | -                 | -         |

**b**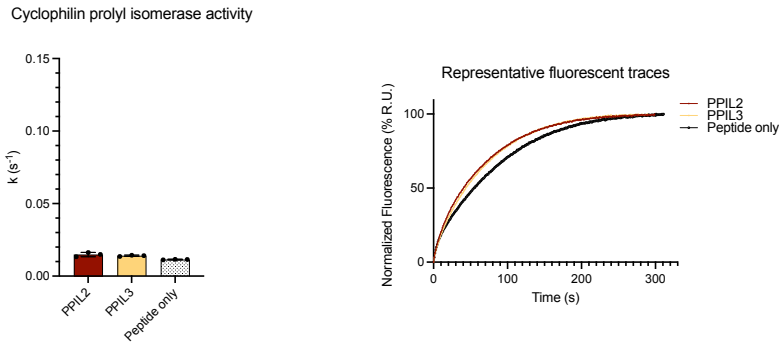

| Cyclophilin  | Prolyl-isomerization rate constant ( $k$ , $s^{-1}$ ) | Signal/Background | Z' Factor |
|--------------|-------------------------------------------------------|-------------------|-----------|
| PPIL2        | 0.015±0.002                                           | 1.4               | -0.65     |
| PPIL3        | 0.0140±0.0005                                         | 1.3               | 0.30      |
| Peptide only | 0.0110±0.0002                                         | -                 | -         |

**c**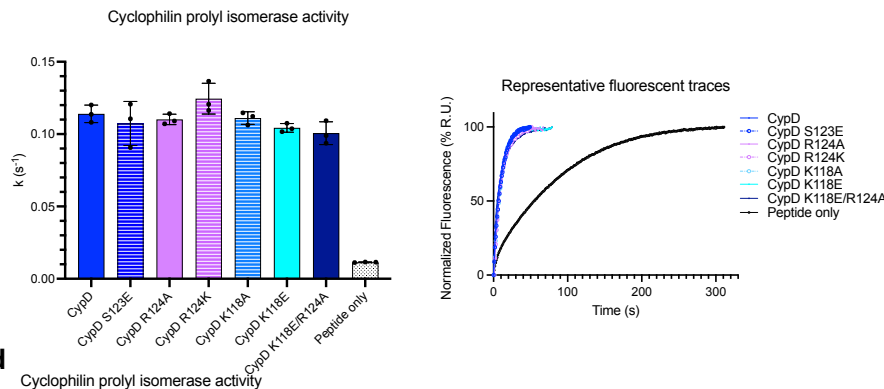

| CypD mutant  | Prolyl-isomerization rate constant ( $k$ , $s^{-1}$ ) | Signal/Background | Z' Factor |
|--------------|-------------------------------------------------------|-------------------|-----------|
| WT           | 0.114±0.006                                           | 10.4              | 0.82      |
| K118A        | 0.111±0.004                                           | 10.1              | 0.87      |
| K118E        | 0.104±0.003                                           | 9.5               | 0.90      |
| S123E        | 0.11±0.01                                             | 10                | 0.69      |
| R124A        | 0.110±0.004                                           | 10                | 0.87      |
| R124K        | 0.12±0.01                                             | 10.9              | 0.72      |
| K118E/R124K  | 0.101±0.008                                           | 9.2               | 0.73      |
| Peptide only | 0.0110±0.0002                                         | -                 | -         |

**d**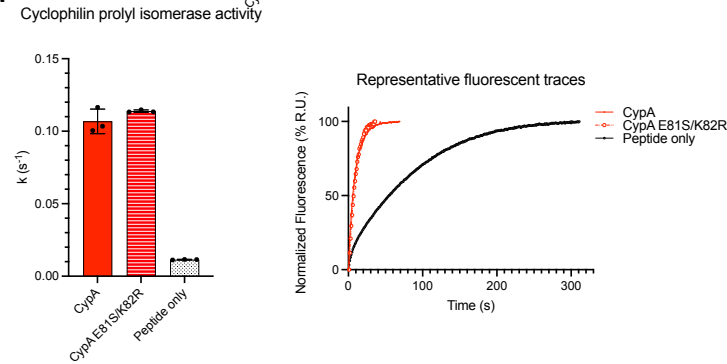

| CypA mutant  | Prolyl-isomerization rate constant ( $k$ , $s^{-1}$ ) | Signal/Background | Z' Factor |
|--------------|-------------------------------------------------------|-------------------|-----------|
| WT           | 0.107±0.009                                           | 9.7               | 0.71      |
| E81S/K82R    | 0.114±0.008                                           | 10.4              | 0.76      |
| Peptide only | 0.0110±0.0002                                         | -                 | -         |



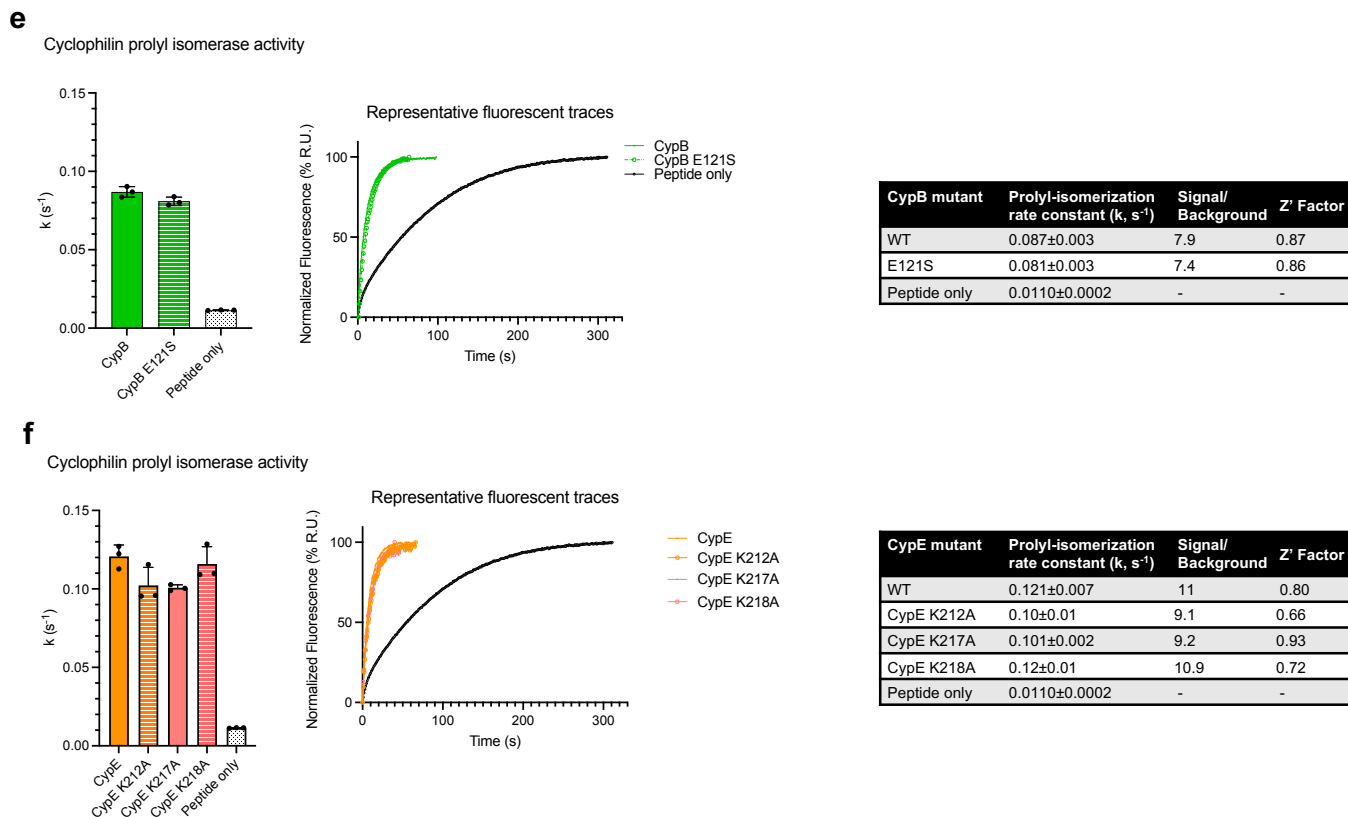

### Supplementary Figure 3 | Prolyl isomerase activity of cyclophilins on Suc-AAPF-AMC.

Rate constant, signal to background ratio (rate constant of cyclophilin divided by rate constant of peptide), and Z' values for: **a**, all wild-type cyclophilins screened; **b**, prolyl isomerase-inactive cyclophilins; **c**, CypD mutants; **d**, CypA E81S/K82R double mutant; **e**, CypB E121S mutant; **f**, CypE mutants. Also included are one representative kinetic trace of each cyclophilin during the assay timescale, normalized to fluorescence at  $t=0$  and maximum fluorescent value. Analyses were halted after calculated maximum fluorescent value due to observed fluorescent bleaching during the sustained fluorescent plateau. Values and error bars reflect mean±SD of three technical replicates.

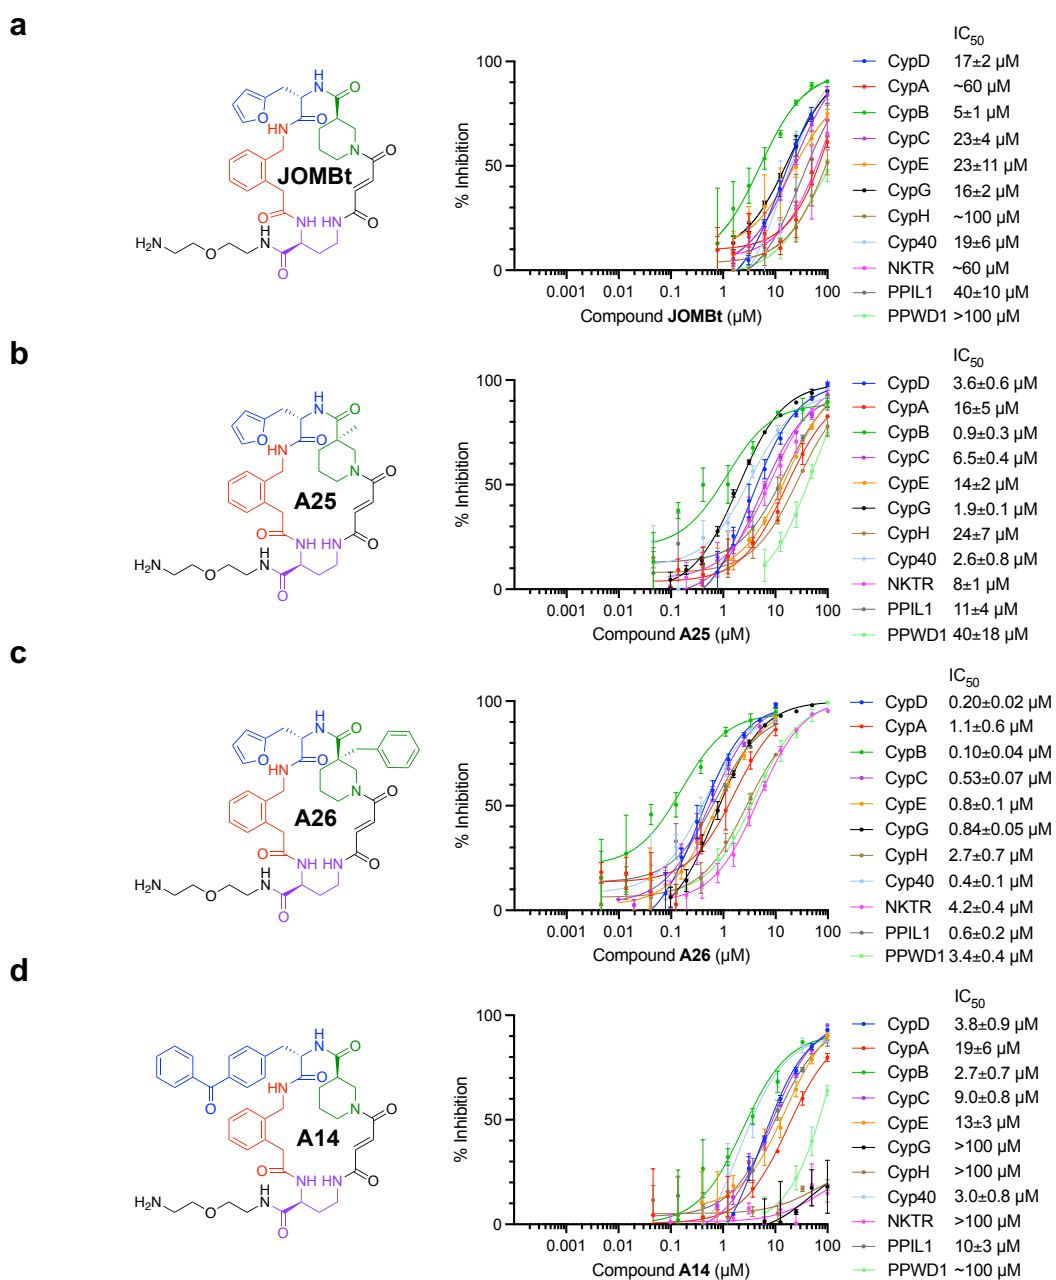

**Supplementary Figure 4 | Functionalization of piperidine  $\alpha$ -carbon improves CypD potency, while replacing the second building block improves CypD selectivity. a, Structure and cyclophilin inhibition dose response profile shown for a, JOMBt; b, A25; c, A26; and d, A14. While iterative functionalization of the  $\alpha$ -carbon with a methyl or benzyl group improves potency for CypD, these compounds are still promiscuous cyclophilin inhibitors, with no gain in selectivity compared to JOMBt. In contrast, diversifying the second building block with larger moieties such as a benzophenone only marginally improve potency, but greatly increase selectivity over CypG, CypH, NKTR, and PPWD1. Crystal structures of JOMBt and A26 corroborate these observations, as the second building block is positioned within the S2 pocket, while the  $\alpha$ -carbon on the piperidine is near a conserved Thr residue (Fig. 1f, Extended Data 3b).  $IC_{50}$  values reflect mean $\pm$ SEM of three technical replicates. Data points and error bars reflect mean $\pm$ SD of individual assays at one dose.**

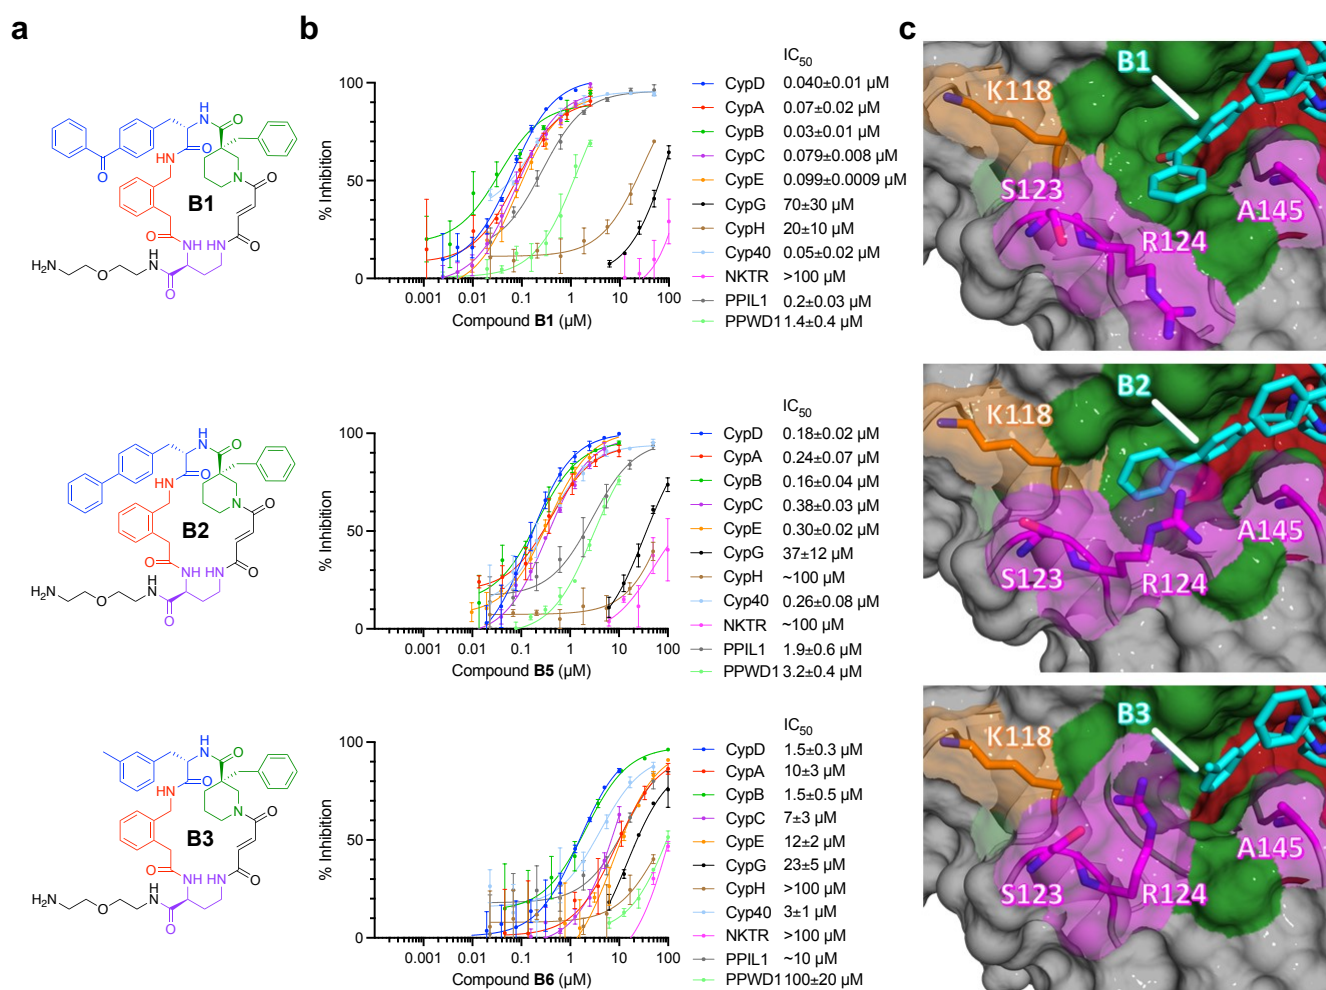

**Supplementary Figure 5 | Large S2 binding groups improve selectivity for CypD.** **a**, Structure of **B1**, **B2**, and **B3**. **b**, Prolyl-isomerase cyclophilin inhibition profile for **B1**, **B2**, and **B3**. **c**, Co-crystal structures of **B1** (PDB ID 7TGU, 1.21 Å resolution), **B2** (PDB ID 7TGV, 1.46 Å resolution), and **B3** (PDB ID 7TH1 1.52 Å resolution) bound to CypD, viewing the S2 pocket. Active site binding is identical to that of **A26** (Fig. 1e). The large benzophenone and biphenyl of **B1** and **B2**, respectively, fill the S2 pocket more completely than **B3**, which contains a *m*-methylphenyl group. This interaction imparts selectivity over CypG, CypH, NKTR, and PPWD1, which have sterically occluded or more structurally rigid S2 pocket residues. Macrocycles with larger S2-binding groups cause R124 to flip out of the S2 pocket in CypD (see Supplementary Fig. 32, Supplementary Video 1). IC<sub>50</sub> values reflect mean±SEM of three technical replicates. Data points and error bars reflect mean±SD of individual assays at one dose.

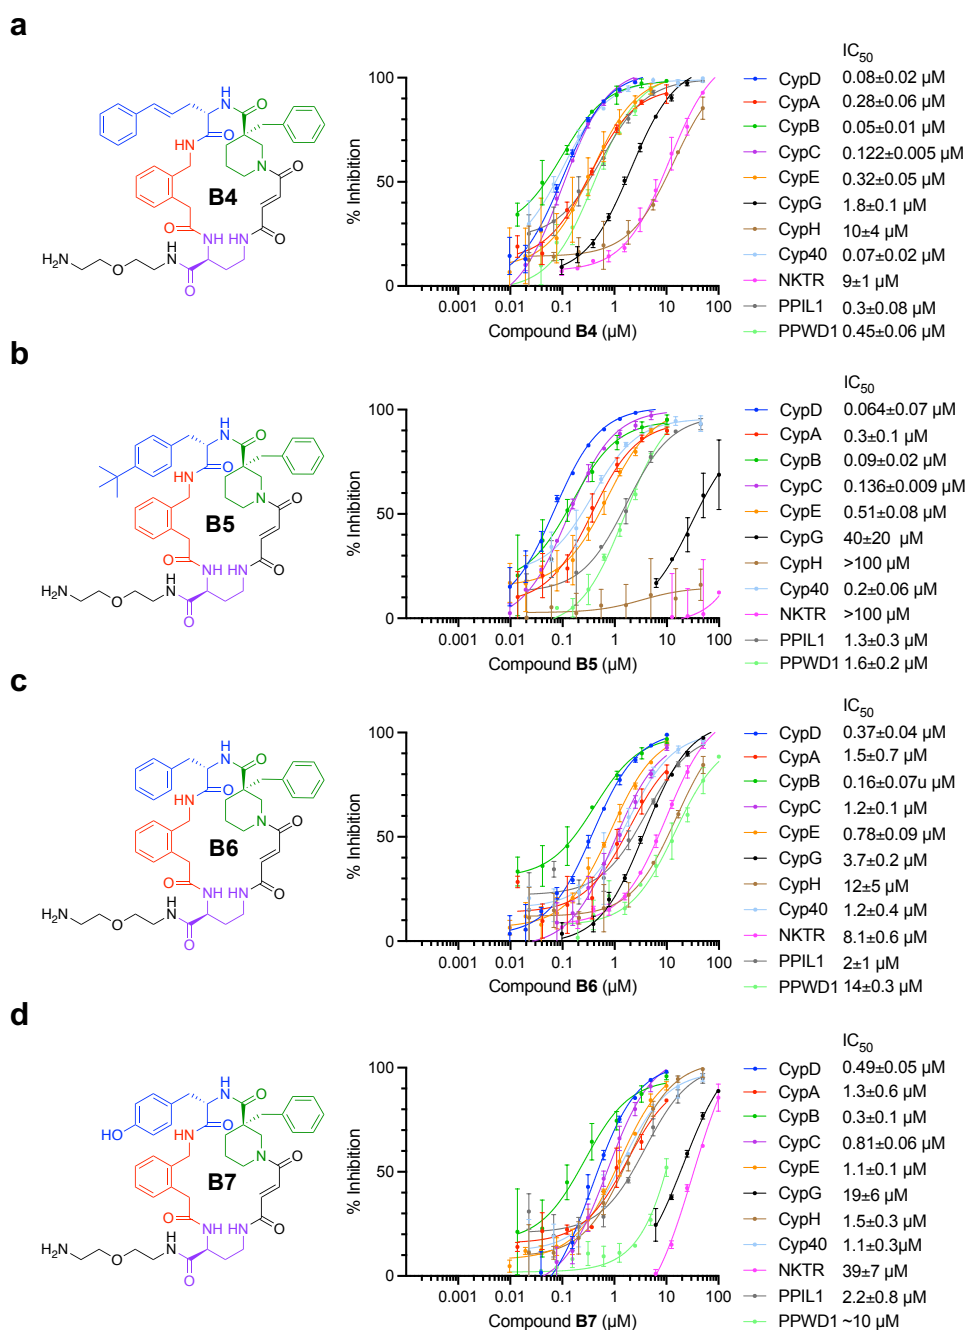

**Supplementary Figure 6 | Large hydrophobic S2 binding groups impart selectivity for CypD over CypG, CypH, NKTR, and PPWD1.** Structure and cyclophilin inhibition dose response data for **a**, **B4**; **b**, **B5**; **c**, **B6**; and **d**, **B7**. Small S2 binding moieties such as the phenylalanine in **B6** do not provide sufficient steric clash with S2 residues, even for cyclophilins with sterically occluded S2 pockets. Binding deeper into S2 pocket with *tert*-butyl phenylalanine in **B5** results in selectivity over CypG, CypH, and NKTR. An intermediate size styryl-alanine in **B4** offers moderate selectivity. **B4** and **B5** also exhibit slightly improved potency for CypD compared to **B6**. Using a tyrosine in **B7** offers little selectivity for CypH, and selectivity over NKTR and CypG, but a decrease in potency compared to **B4** and **B5**. IC<sub>50</sub> values reflect mean±SEM of three technical replicates. Data points and error bars reflect mean±SD of individual assays at one dose.

**a**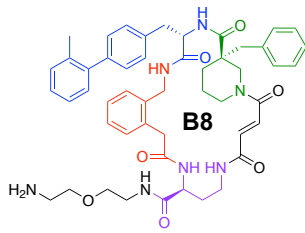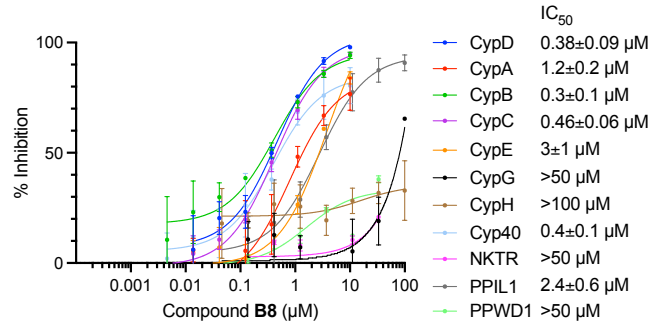**b**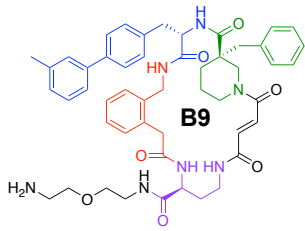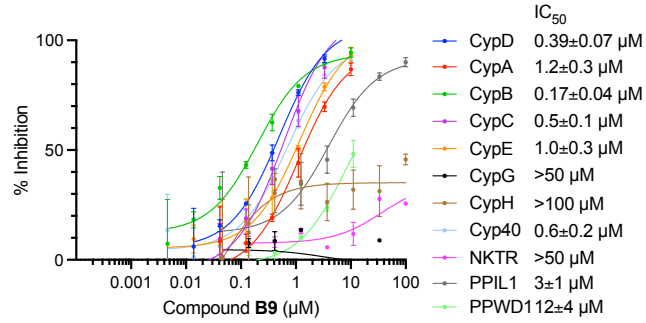**c**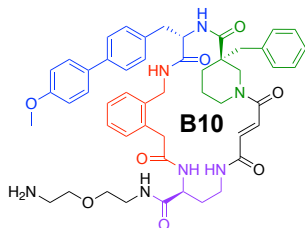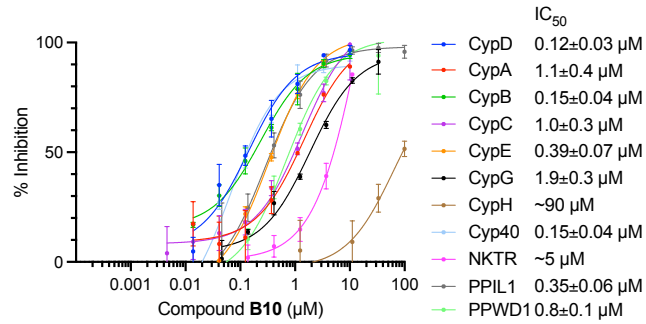**d**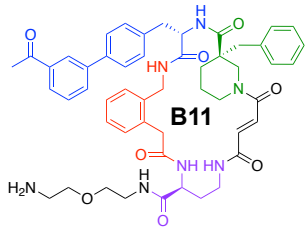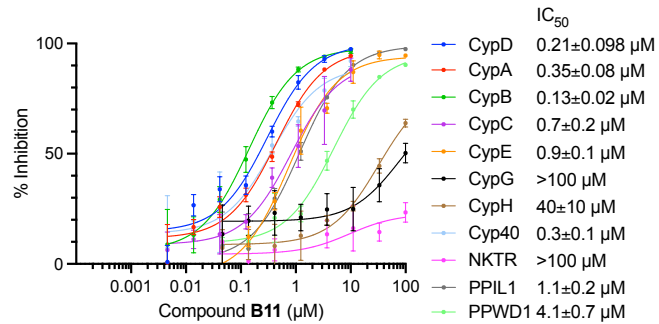**e**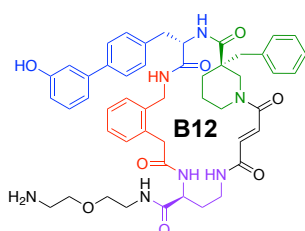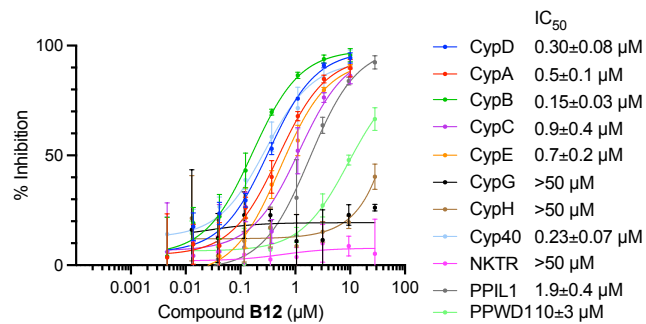

**f**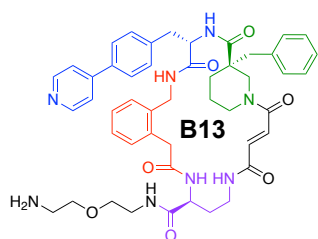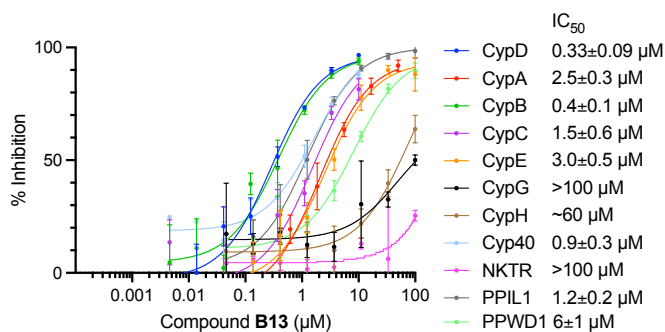**g**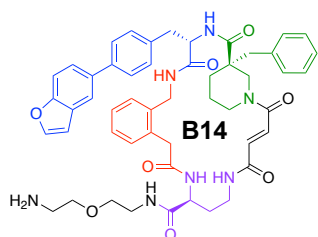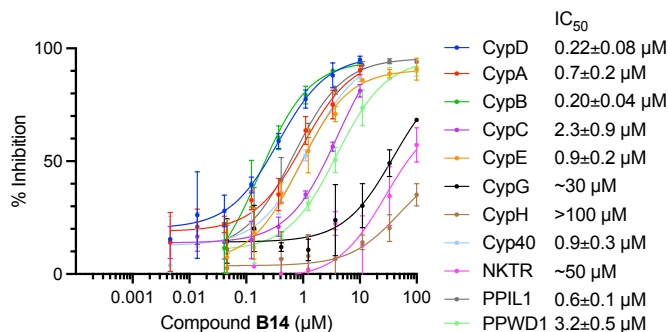

**Supplementary Figure 7 | Biphenyl and bi-aromatic derivatives of B2 showing no improvement in selectivity for CypD.** Structure and cyclophilin inhibition dose response data for **a**, B8; **b**, B9; **c**, B10; **d**, B11; **e**, B12; **f**, B13; and **g**, B14. These compounds exhibit similar gain in selectivity over CypG, CypH, NKTR, and PPWD1 as in B2, but no further selectivity for CypD. IC<sub>50</sub> values reflect mean±SEM of three technical replicates. Data points and error bars reflect mean±SD of individual assays at one dose.

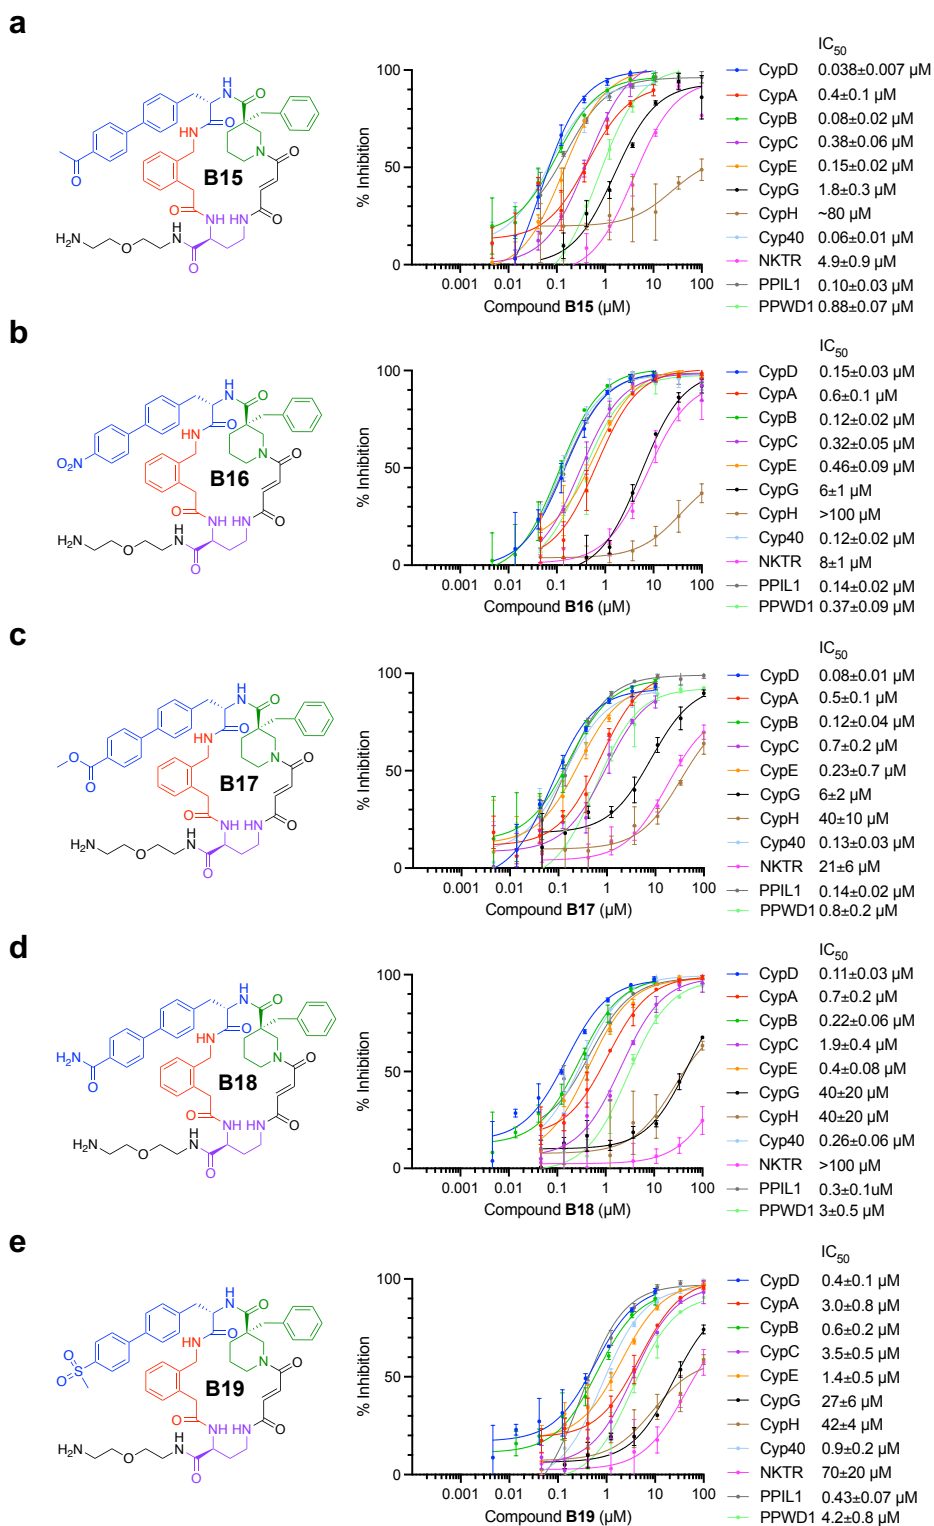

**Supplementary Figure 8 | Para-carbonyl-containing biphenyl moieties show partial selectivity over CypC.** Structure and cyclophilin inhibition dose response data for **a**, **B15**; **b**, **B16**; **c**, **B17**; **d**, **B18**; and **e**, **B19**. **B15**, **B17**, **B18**, and **B19** show reduced potency for CypC compared to CypD. These para-carbonyl biphenyl groups maintain a similar selectivity profile over CypG, CypH, and NKTR as **B2**. IC<sub>50</sub> values reflect mean±SEM of three technical replicates. Data points and error bars reflect mean±SD of individual assays at one dose.

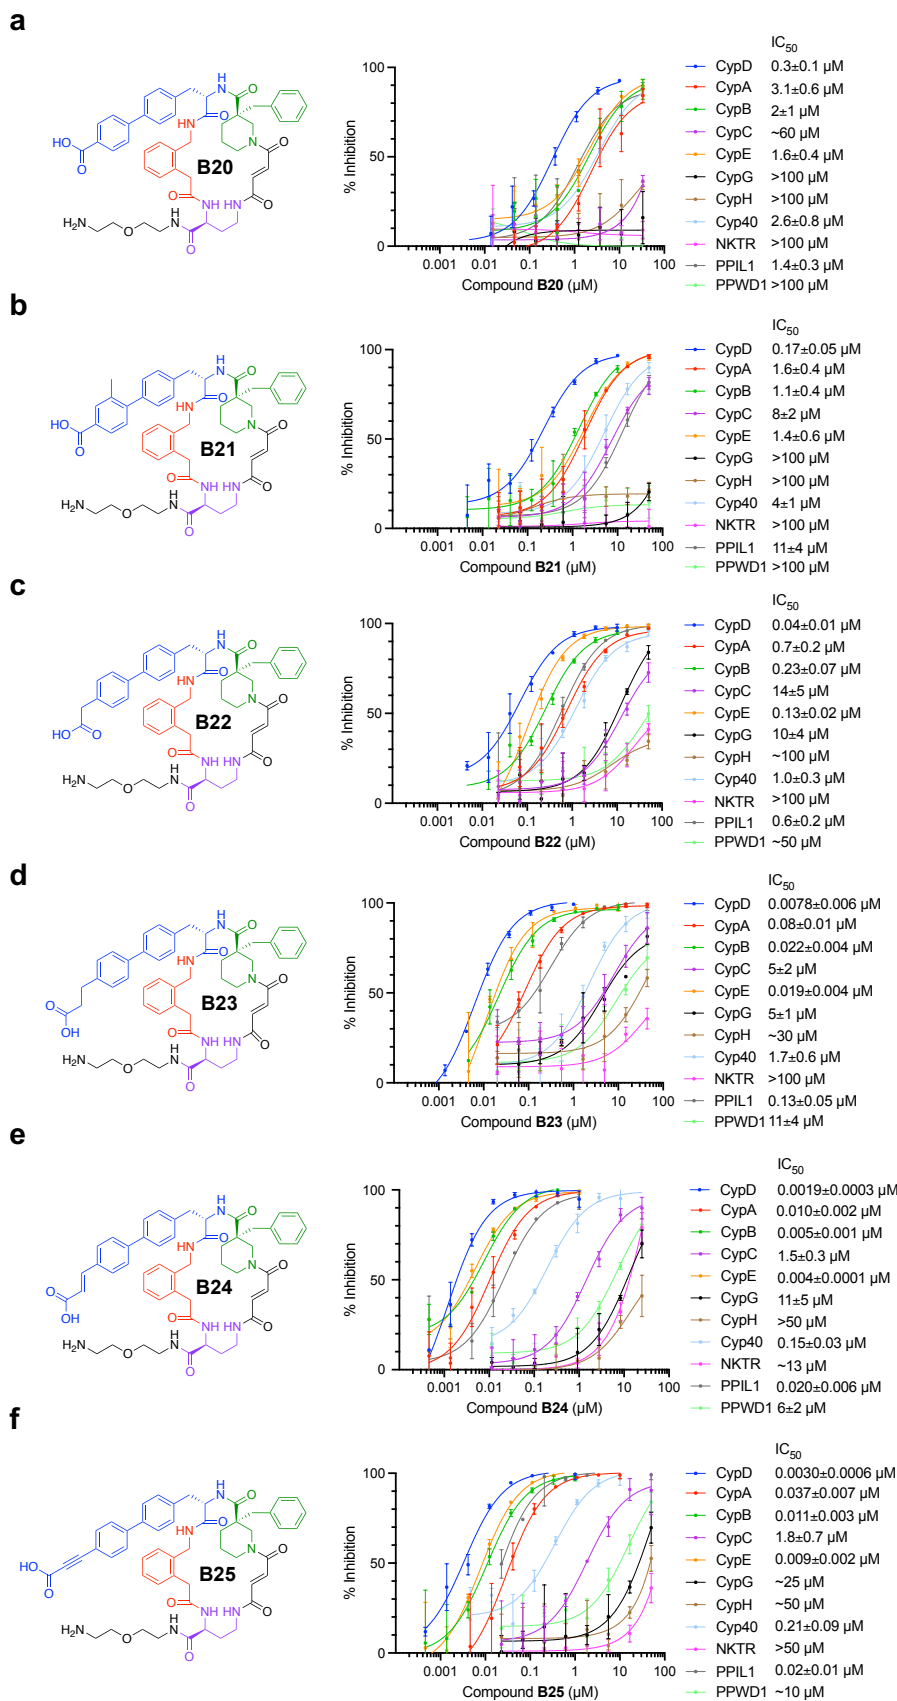

**Supplementary Figure 9 | Para-carboxy-containing biphenyl groups provide enhanced selectivity and potency for CypD. Structure and cyclophilin inhibition dose response data for**



**a, B20; b, B21; c, B22; d, B23; e, B24; and f, B25.** The carboxylate in **B20** and **B21** provides a high degree selectivity over CypC and Cyp40. Extension of the carboxylate from the biphenyl with a methylene in **B22** further improves potency for CypD and selectivity over CypC, Cyp40, PPIL1 and CypA. Extension with an ethylene in **B23** gives high potency for CypD, strong selectivity over CypC and Cyp40, and appreciable selectivity over CypA and PPIL1. Replacement of **B23**'s ethylene linker between the biphenyl and carboxylate with a vinyl or ethynyl linker in **B24** and **B25**, respectively, mimics **B23** potency and selectivity profile, but with slightly lower selectivity over PPIL1. IC<sub>50</sub> values reflect mean±SEM of three technical replicates. Data points and error bars reflect mean±SD of individual assays at one dose.

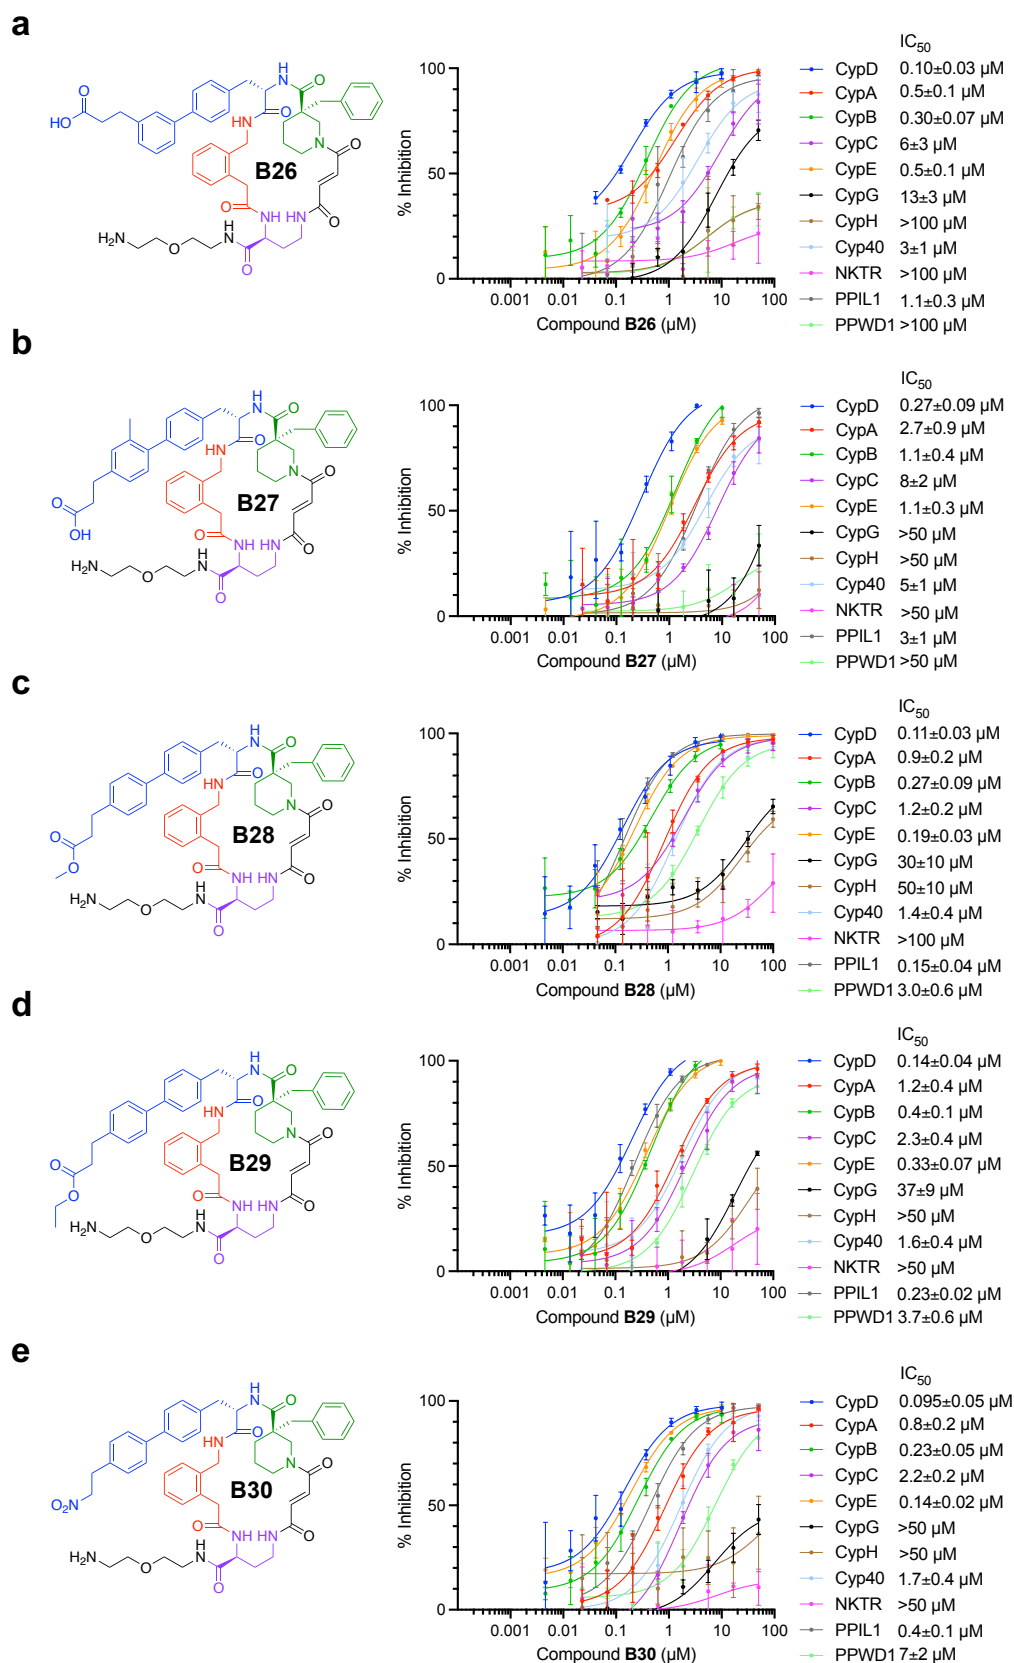

**Supplementary Figure 10 | Masking or moving the carboxylate of B23 results in loss in potency and selectivity for CypD. Structure and cyclophilin inhibition dose response data for**

**a, B26; b, B27; c, B28; d, B29; and e, B30.** Compared to **B23**, alternate placement of the carboxylate on the biphenyl results in decreased potency and selectivity, shown with *meta* placement of the carboxylate in **B26** or adjusting biphenyl substitution in **B27**. Presumably, **B27** exhibits a binding mode similar to that shown in the **B21** co-crystal structure (PDB ID 7TH6, 0.97 Å resolution), where the *ortho*-methyl migrates the biphenyl out of the S2 pocket. Masking the negative charge of the carboxylate with a methyl ester, ethyl ester, or a net-neutral nitro group in **B28**, **B29**, and **B30** respectively, results in the same loss in potency and selectivity. IC<sub>50</sub> values reflect mean±SEM of three technical replicates. Data points and error bars reflect mean±SD of individual assays at one dose.

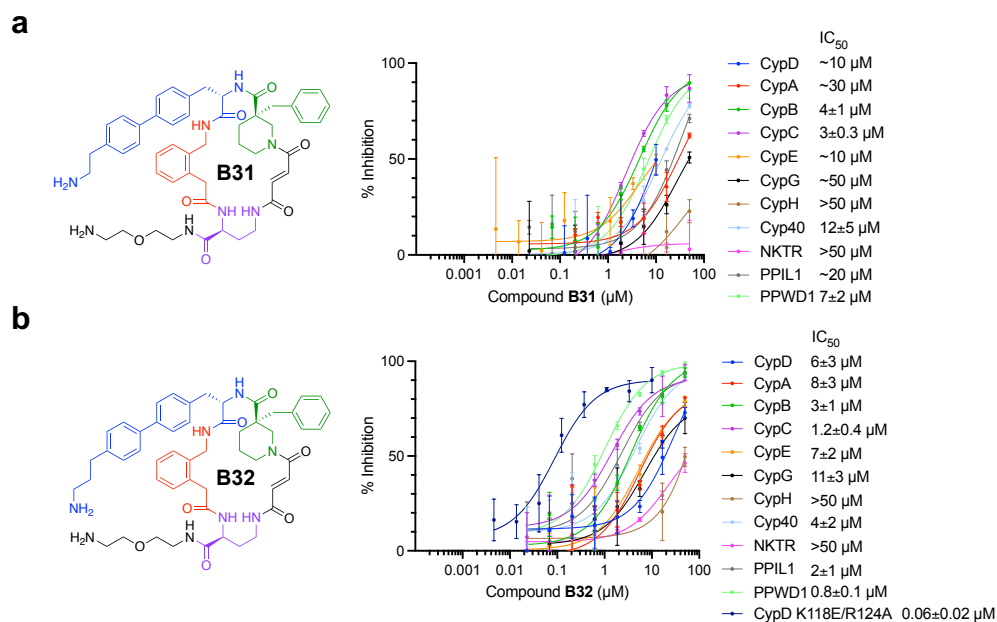

**Supplementary Figure 11 | Inverting ligand charge abrogates CypD potency and shifts the cyclophilin selectivity profile.** Structure and cyclophilin inhibition dose response data for **a**, **B31**; and **b**, **B32**. Inserting an amine with a net positive charge results in >1,000-fold reduction in CypD potency, presumably due to charge-charge repulsion at the K118 residue. **B31** and **B32** also show some selectivity preference for CypC and PPWD1, respectively. Both of these cyclophilins have a negatively charged glutamate residue replacing CypD's K118 residue. The inhibition potency of **B32** is restored against the charge-inverted mutant CypD K118E/R124A, preferentially inhibiting this mutant over any wild-type cyclophilin. IC<sub>50</sub> values reflect mean±SEM of three technical replicates. Data points and error bars reflect mean±SD of individual assays at one dose.

**a**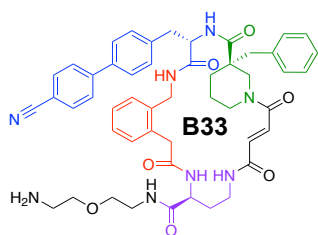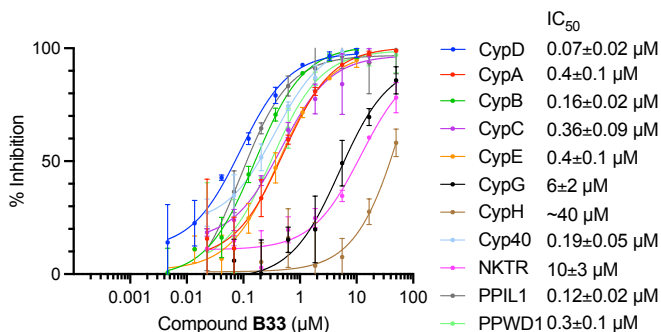**b**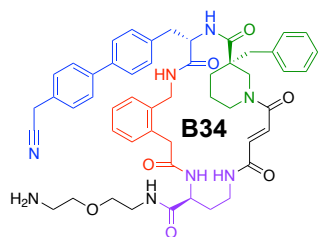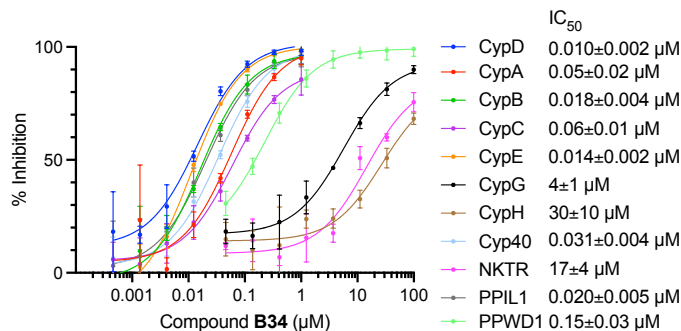

**Supplementary Figure 12 | Nitrile-containing biphenyl groups show similar CypD inhibition potencies and linker dependencies as carboxylates.** Structure and cyclophilin inhibition dose response data for **a**, **B33**; and **b**, **B34**. The increased potency of **B34** compared to **B33** is consistent with the same trend we observed for **B22** and **B23**. IC<sub>50</sub> values reflect mean±SEM of three technical replicates. Data points and error bars reflect mean±SD of individual assays at one dose.

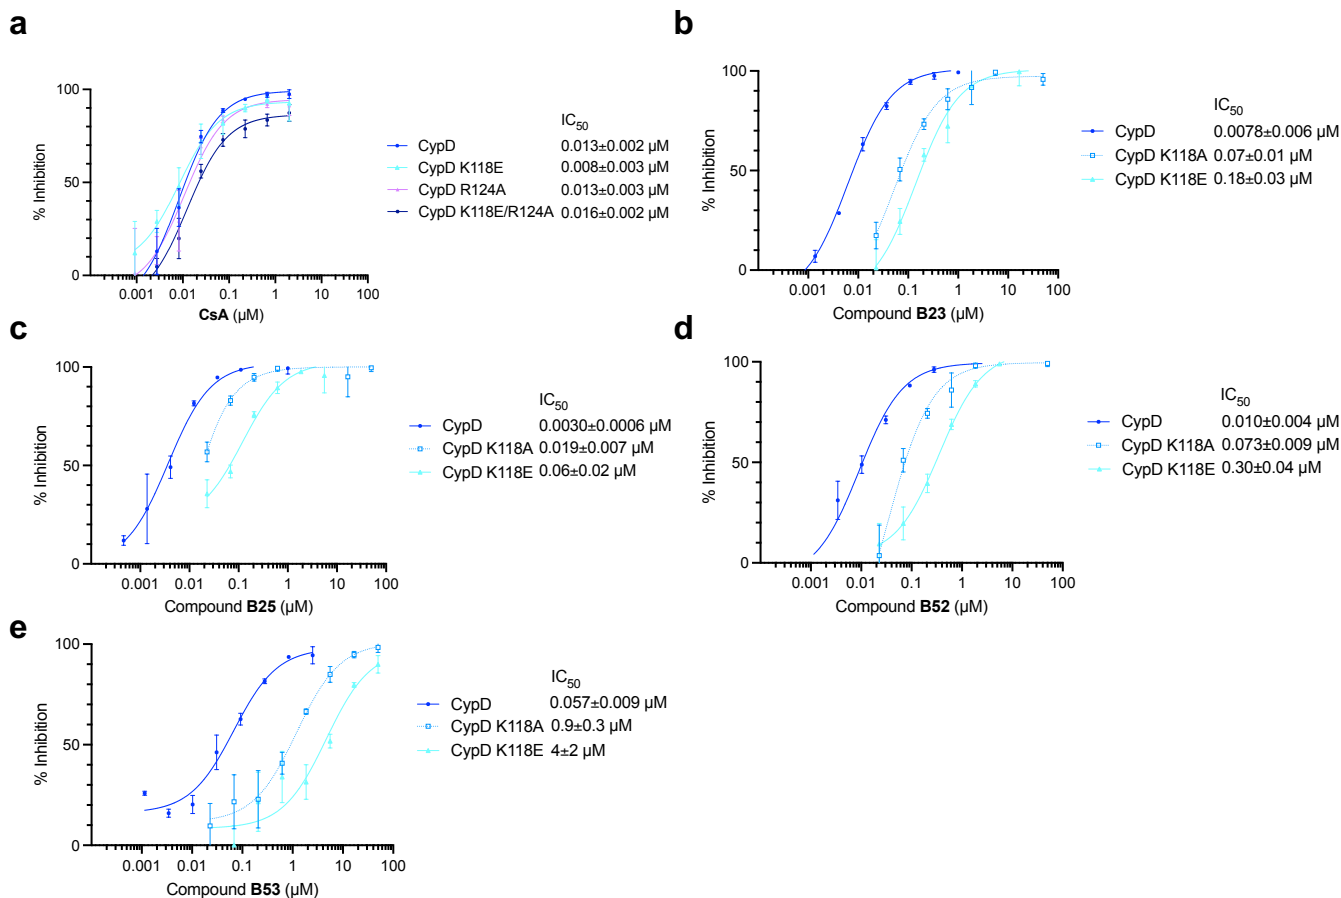

**Supplementary Figure 13 | Residue K118 is necessary for potent CypD inhibition with carboxylate-containing inhibitors.** Dose response curves of CypD, CypD K118A, and CypD K118E with **a**, CsA; **b**, B23; **c**, B25; **d**, B52; and **e**, B53. CsA as an active site ligand does not show appreciable changes in potency for CypD mutants compared to wild-type CypD. A salt bridge was observed in each crystal structure between a carboxylate on B23, B25, B52, and B53, and residue K118 (Fig. 3c, Fig. 4c). Mutation to a neutral alanine results in a 6- to 20-fold decrease in potency compared to wild-type CypD. Mutation to a negatively charged glutamate results in a 20- to 100-fold decrease in potency compared to wild-type CypD. For CypD wild-type IC<sub>50</sub> data with B52 and B53, values reflect mean±SD of four independent replicates (each comprising three technical replicates). Graphs show a representative single independent replicate (Independent replicate 1 is shown, containing three technical replicates) with data points and error bars reflecting mean±SD of individual assays at one dose. Further independent replicates are shown in Supplementary Fig. 18b-c. All other IC<sub>50</sub> values reflect mean±SEM of three technical replicates, with data points and error bars reflecting mean±SD of individual assays at one dose.

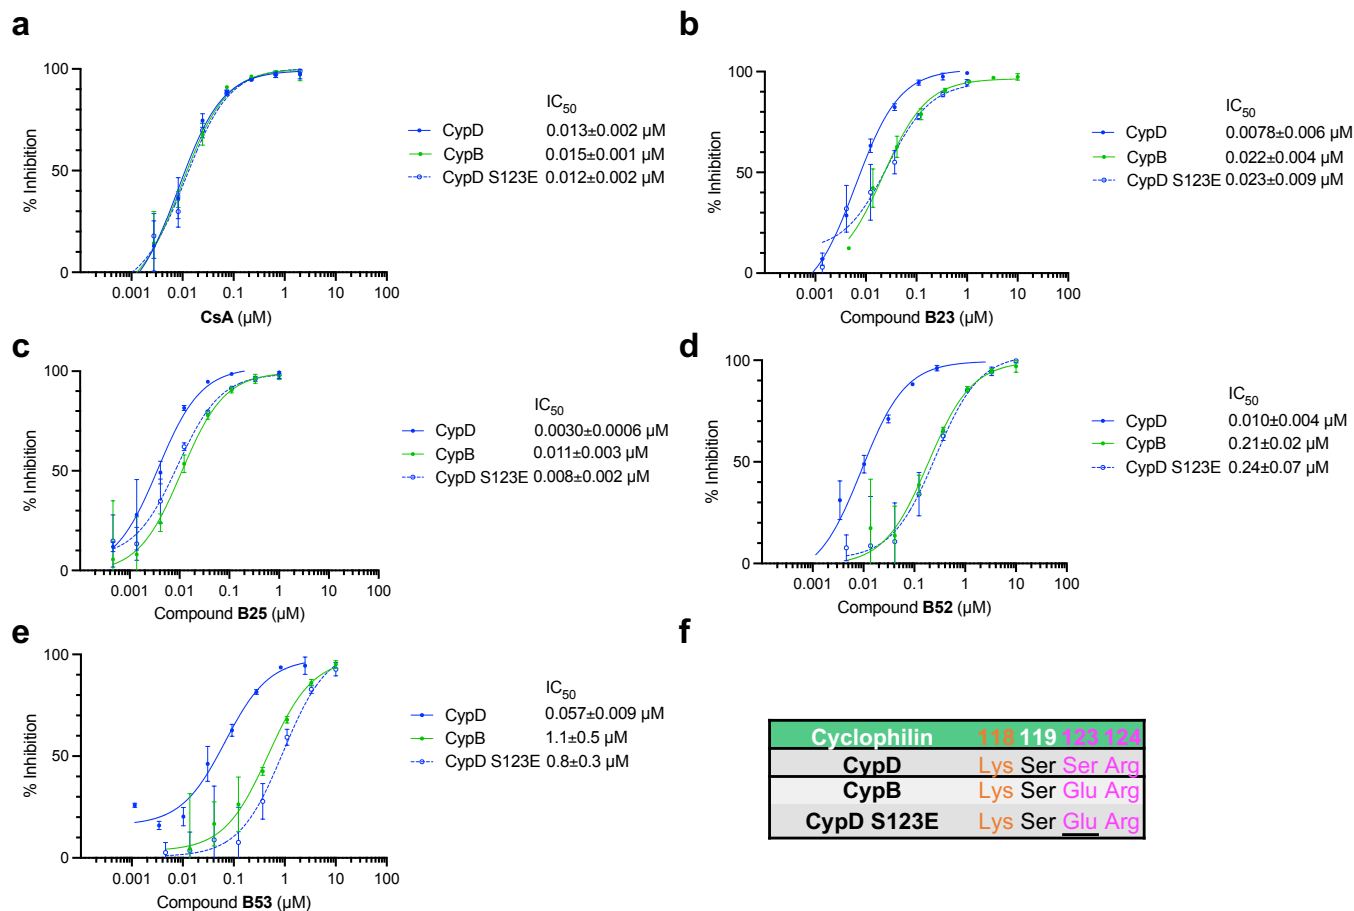

**Supplementary Figure 14 | S123 gatekeeper position dictates inhibitor potency.** Dose response curves of CypD, CypB, and CypD S123E, shown for **a**, CsA; **b**, B23; **c**, B25. **d**, B52; and **e**, B53. **f**, List of residues on the far side of the S2 pocket of cyclophilins that are proximal to the ligand carboxylates, with the CypD mutation underlined. CsA as an active site ligand does not show appreciable differences in potency between wild-type CypD, wild-type CypB, and CypD S123E. Wild-type CypB and wild-type CypD share identical S2 pockets with the exception of the analogous CypD S123 residue, which is a glutamate in CypB. CypD S123E thus provides the same S2 pocket as CypB WT, resulting in almost identical potencies for these two proteins for all inhibitors shown. For CypD and CypB wild-type IC<sub>50</sub> data with B52 and B53, values reflect mean±SD of four independent replicates (each comprising three technical replicates). Graphs show a representative single independent replicate (Independent replicate 1 is shown, containing three technical replicates) with data points and error bars reflecting mean±SD of individual assays at one dose. Further independent replicates are shown in Supplementary Fig. 18b-c. All other IC<sub>50</sub> values reflect mean±SEM of three technical replicates, with data points and error bars reflecting mean±SD of individual assays at one dose.

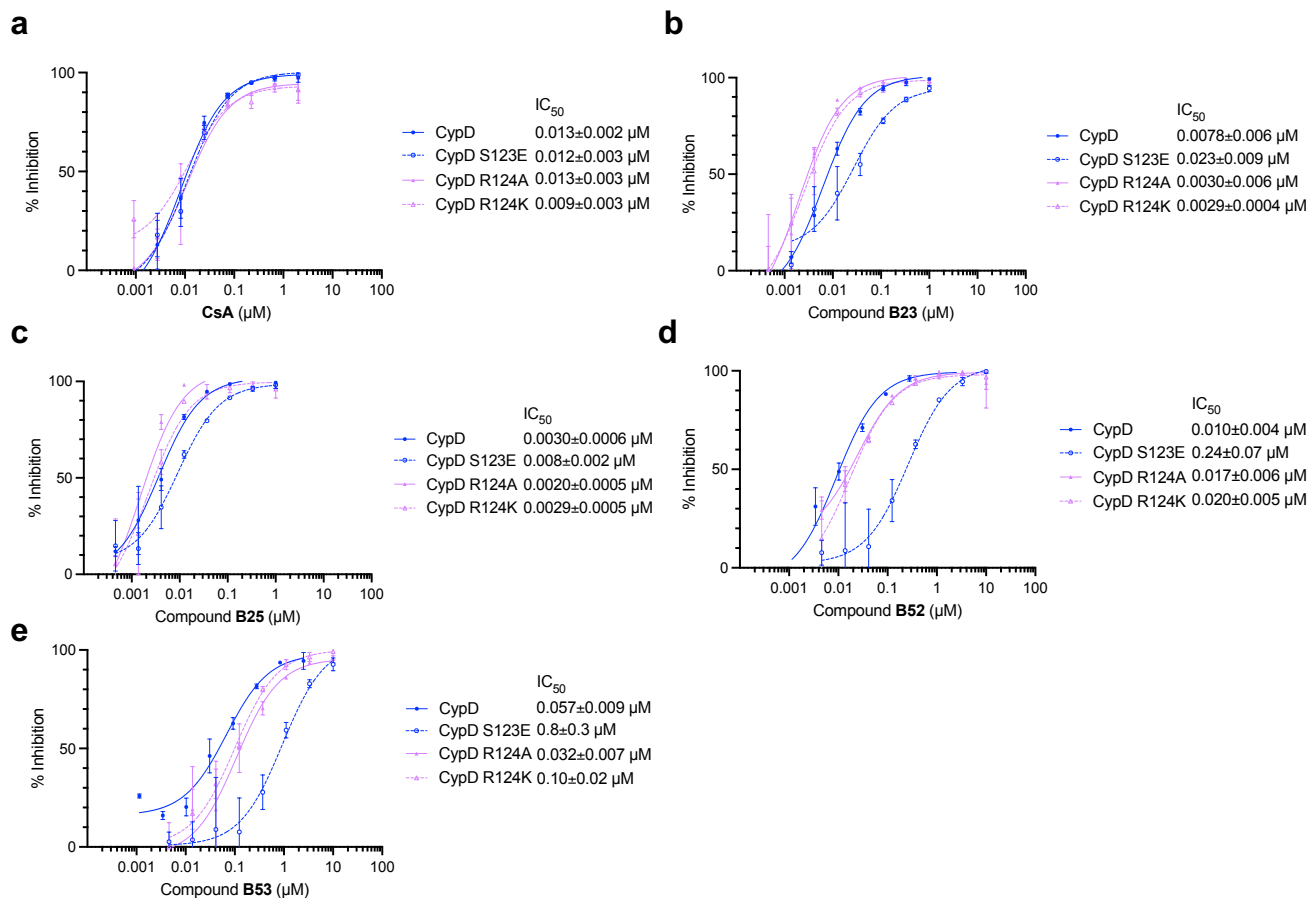

**Supplementary Figure 15 | Prolyl isomerase inhibition activity on CypD gatekeeper mutants.** Dose response curves of CypD and CypD S123E, CypD R124A, and CypD R124K mutants, shown for **a**, CsA; **b**, B23; **c**, B25; **d**, B52; and **e**, B53. CsA as an active site ligand does not show appreciable differences in potency between wild-type CypD and CypD mutants. Each carboxylate-containing ligand shows a modest drop in potency for CypD S123E compared to wild-type CypD, indicating a transient interaction with this residue. Little to no drop-in potency for R124A or R124K mutants suggest that the carboxylates for each compound do not interact with this residue directly. For CypD wild-type IC<sub>50</sub> data with B52 and B53, values reflect mean±SD of four independent replicates (each comprising three technical replicates). Graphs show a representative single independent replicate (Independent replicate 1 is shown, containing three technical replicates) with data points and error bars reflecting mean±SD of individual assays at one dose. Further independent replicates are shown in Supplementary Fig. 18b-c. All other IC<sub>50</sub> values reflect mean±SEM of three technical replicates, with data points and error bars reflecting mean±SD of individual assays at one dose.



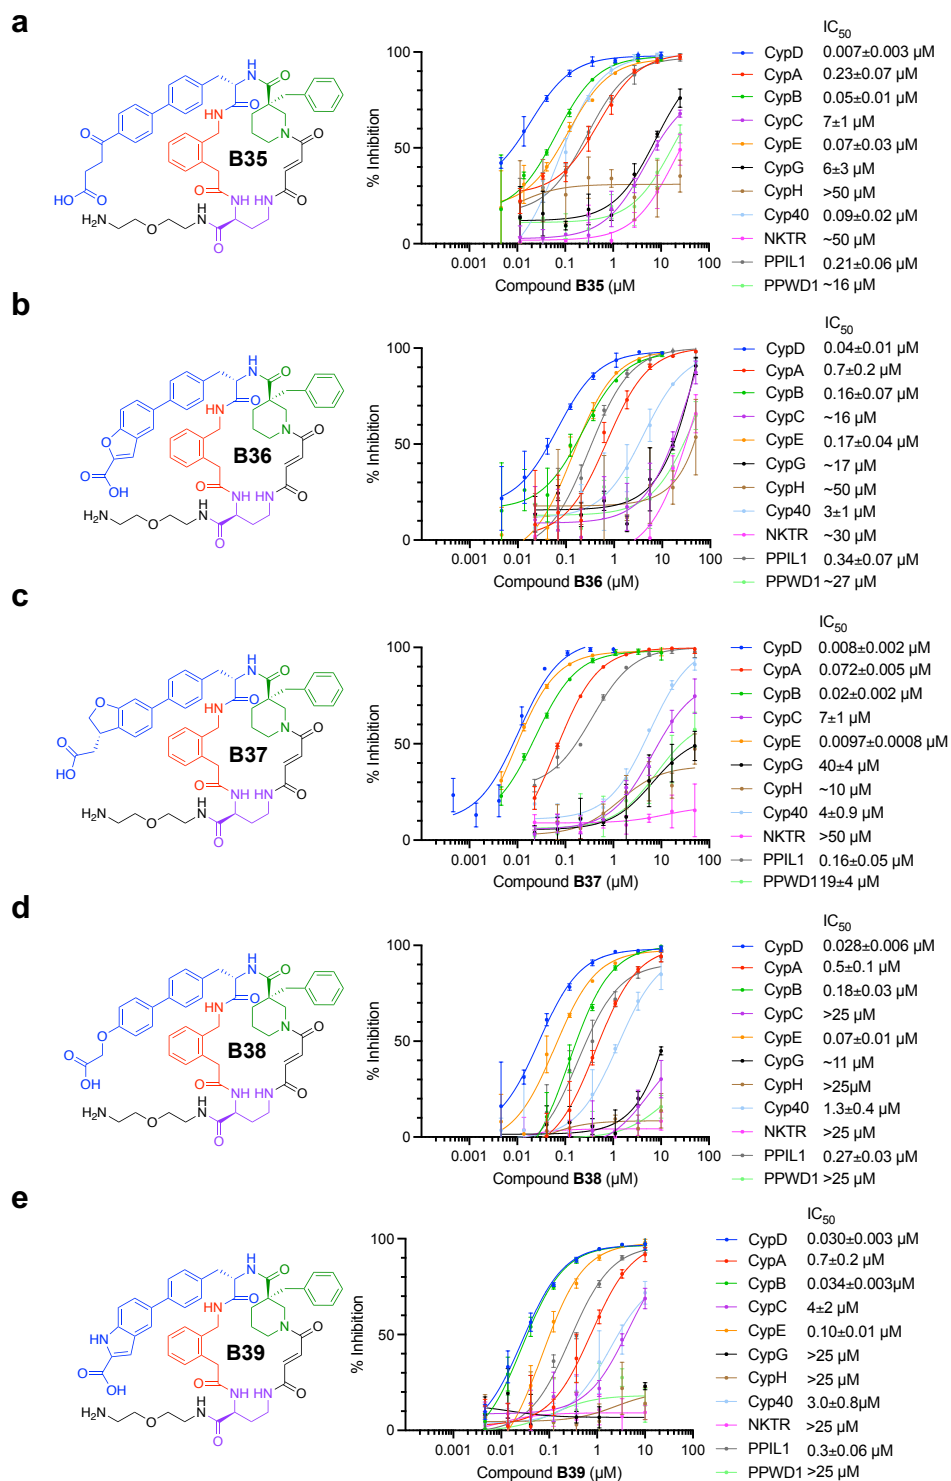

**Supplementary Figure 16 | Derivatives of B23 that show similar selectivity and potency profiles for CypD.** Structure and cyclophilin inhibition dose response data for **a**, B35; **b**, B36; **c**, B37; **d**, B38; and **e**, B39. Compared to B23, all compounds maintain the same CypD potency and selectivity profile. Presumably, these compounds retain the interactions with K118 and S119 shown in the B23 co-crystal structure (Fig. 3c).  $\text{IC}_{50}$  values reflect mean  $\pm$  SEM of three technical replicates. Data points and error bars reflect mean  $\pm$  SD of individual assays at one dose.

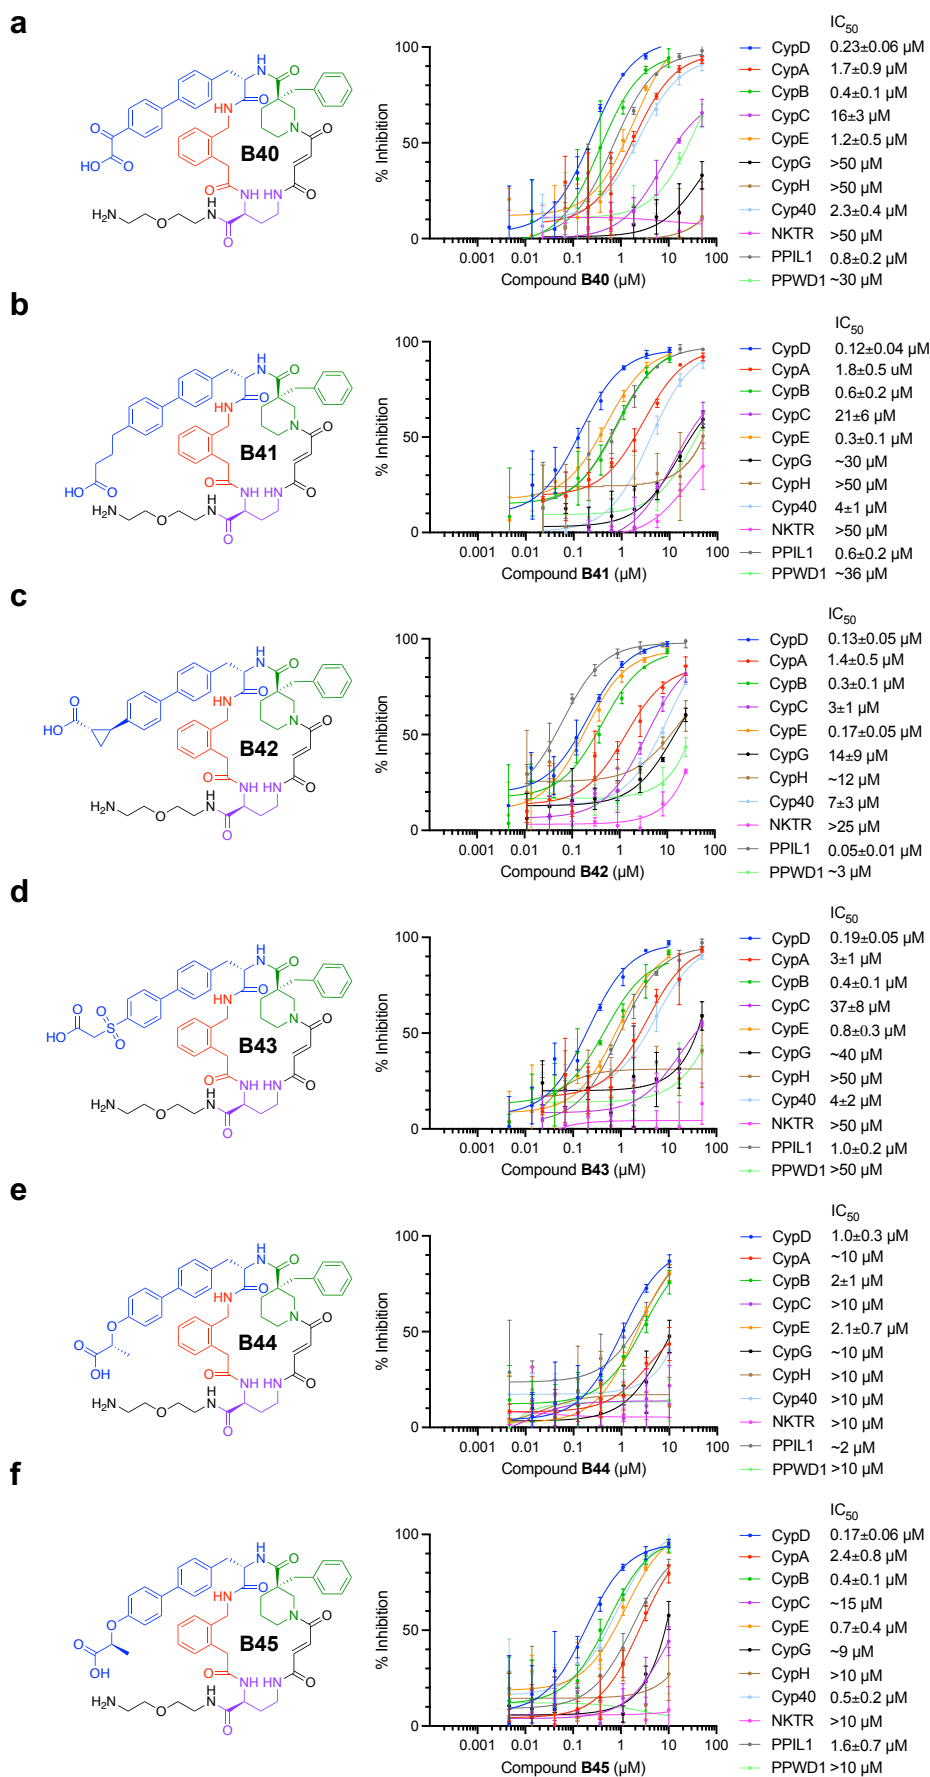

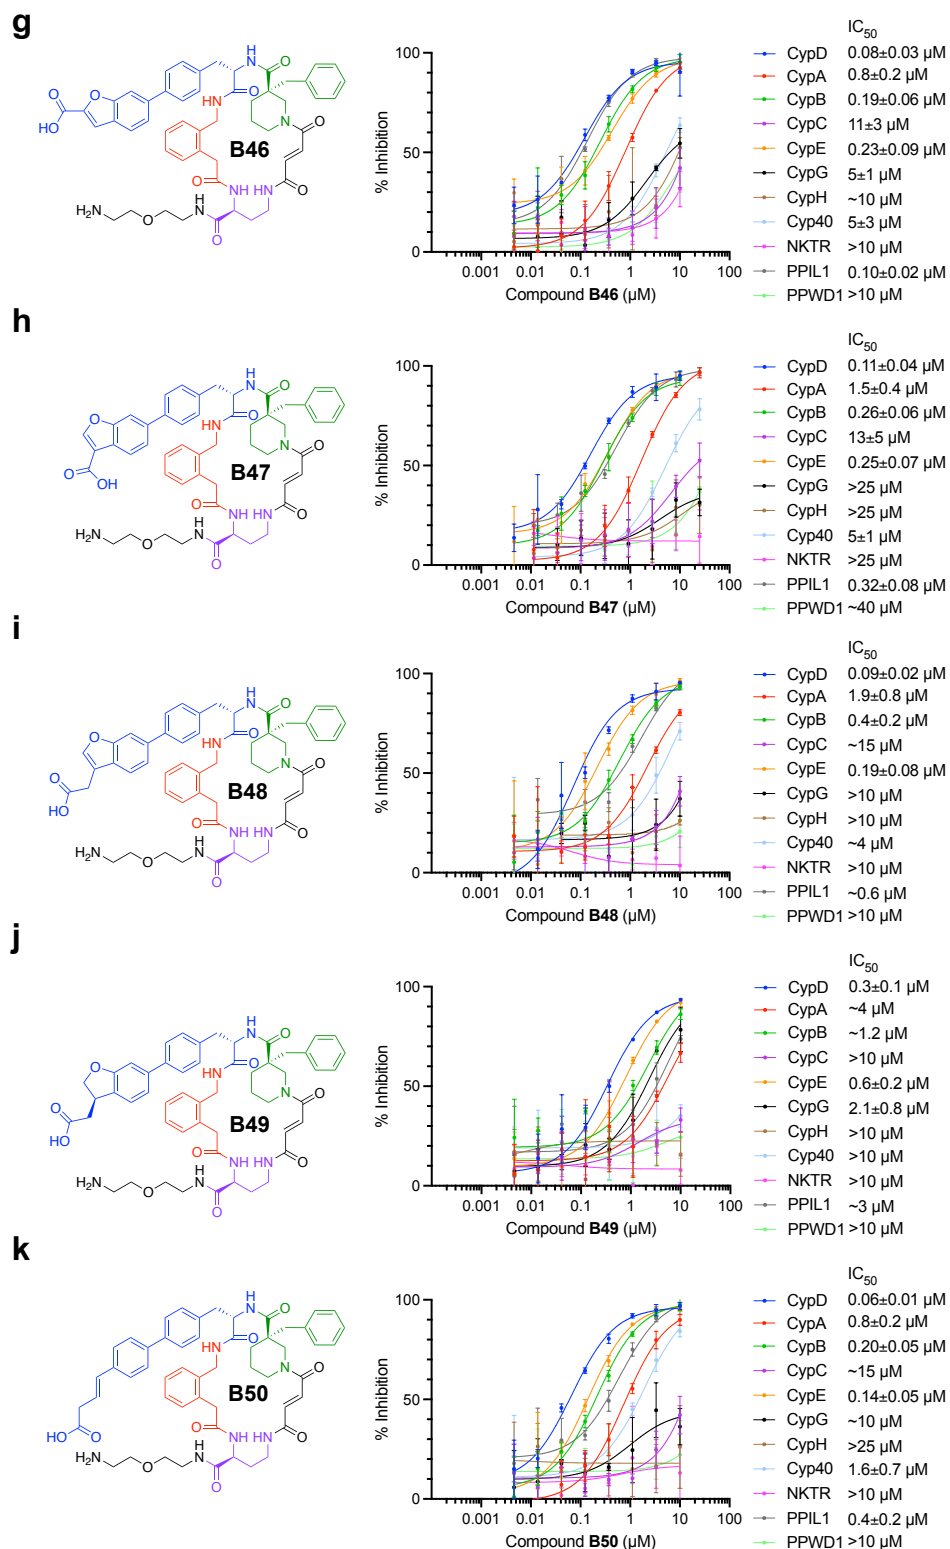

**Supplementary Figure 17 | Derivatives of B23 that show reduced potency and selectivity for CypD.** Structure and cyclophilin inhibition dose response data for **a, B40; b, B41; c, B42; d, B43; e, B44; f, B45; g, B46; h, B47; i, B48; j, B49; and k, B50**. Functionalization of the ethylene linker for **B23** commonly results in loss of potency and selectivity, shown in **B40, B42, B43, B44, and B45**, suggesting these extra functional groups interfere with the carboxylate's binding with

K118 and S119 residues. Extension of the linker further than **B23**'s ethylene (**B41** and **B50**) also reduces CypD potency. Other versions of structural rigidity introduced to the carboxylate, such as heterocycles, must be precisely placed, as **B42**, **B46**, **B47**, **B48**, and **B49** all show reduced potency compared to other heterocycle-carboxylates, such as **B37** and **B39** (Supplemental Fig. 16). IC<sub>50</sub> values reflect mean±SEM of three technical replicates. Data points and error bars reflect mean±SD of individual assays at one dose.

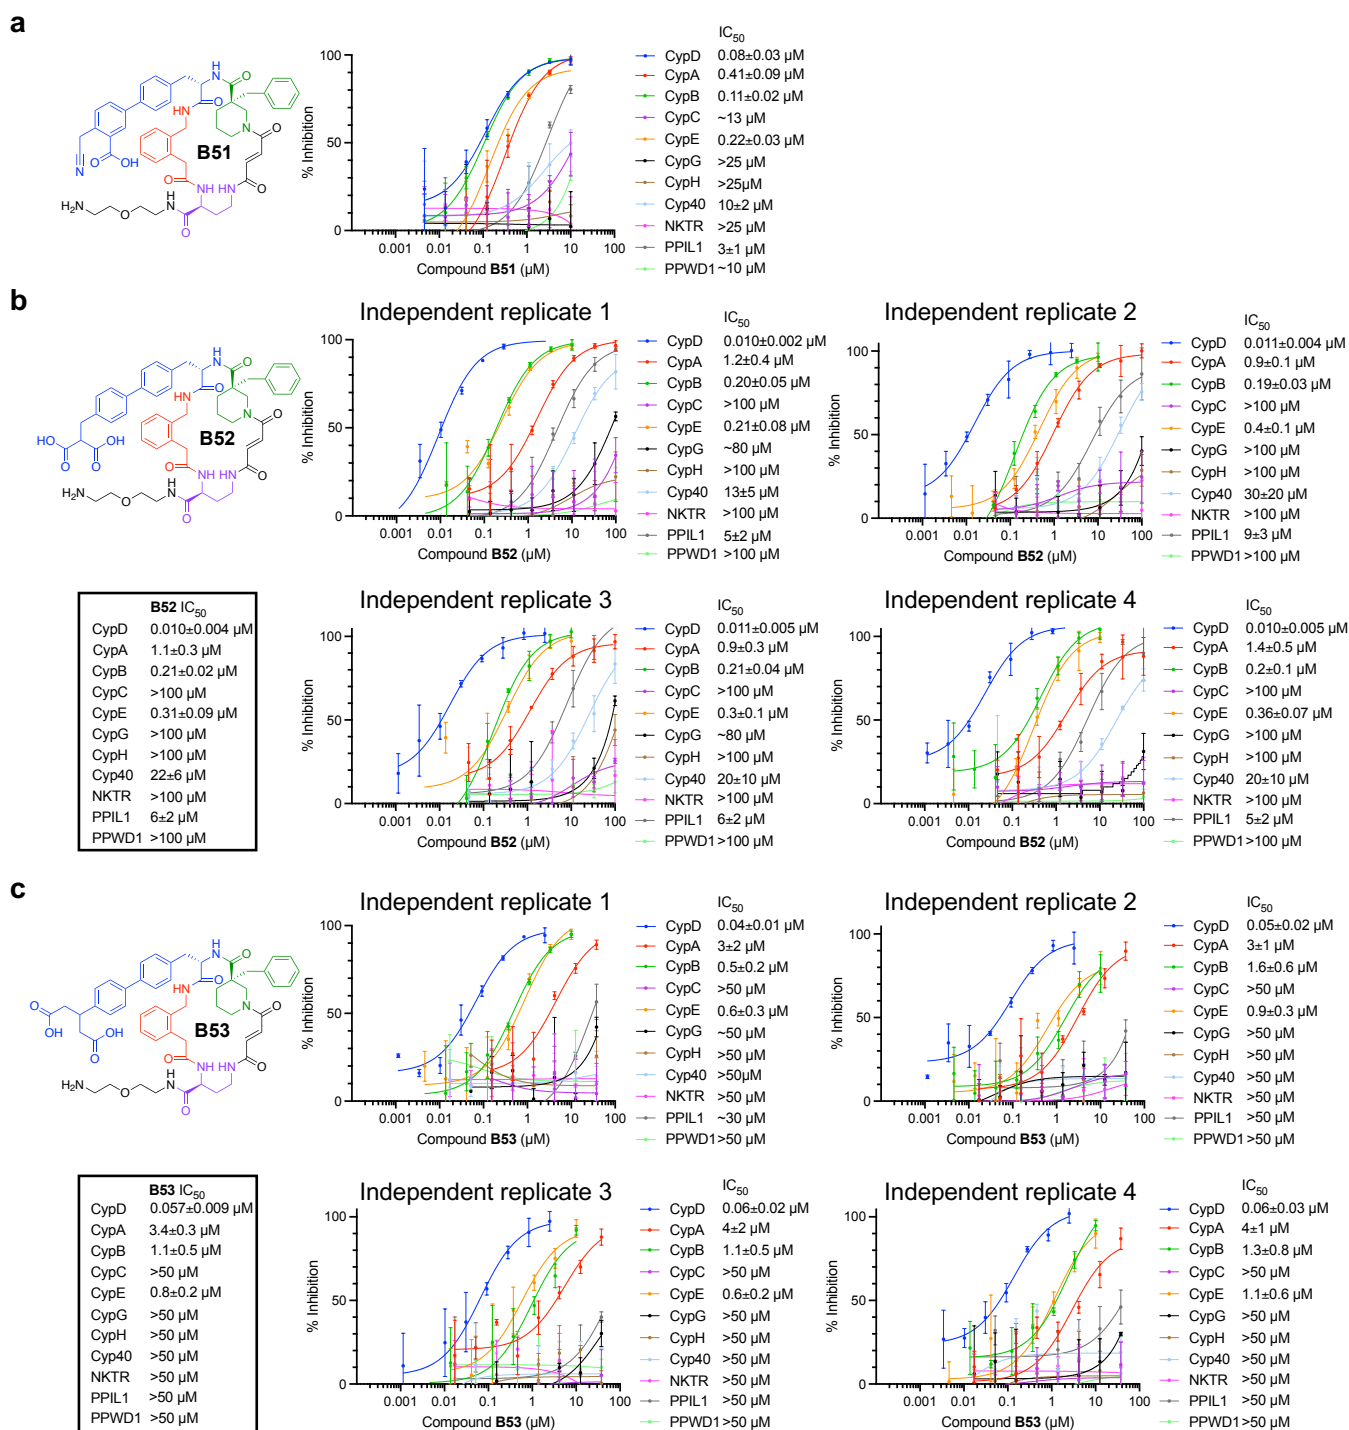

**Supplementary Figure 18 | B23 derivatives that can simultaneously interact with CypD residues K118 and S119 and present a carboxylate near gatekeeper residues. Structure and cyclophilin inhibition dose response data for a, B51; b, B52; and c, B53. Nitrile derivatives that previously showed high potency but poor selectivity for CypD (Supplemental Fig. 12) were functionalized with a carboxylate, shown in B51. This change resulted in loss of potency, but similar selectivity profiles as B23. A large improvement in selectivity was observed when dicarboxylate groups were used. For both B52 and B53, one carboxylate is oriented to interact with K118 and S119, while the second carboxylate is directed towards the gatekeeper residue**

S123 of CypD (Fig. 4c). For **B52** and **B53**, four independent replicates (each comprising three technical replicates) are shown, with their respective fitted values that reflect mean $\pm$ SEM of three technical replicates. Data points and error bars reflect mean $\pm$ SD of individual assays at one dose. Tables show final reported IC<sub>50</sub> values that reflect mean $\pm$ SD of four independent replicates, whose values are used for the entirety of this work. Independent replicate 1 was collected with a separately synthesized compound batch than independent replicates 2, 3, and 4. For **B51**, IC<sub>50</sub> values reflect mean $\pm$ SEM of three technical replicates, with data points and error bars reflecting mean $\pm$ SD of individual assays at one dose.

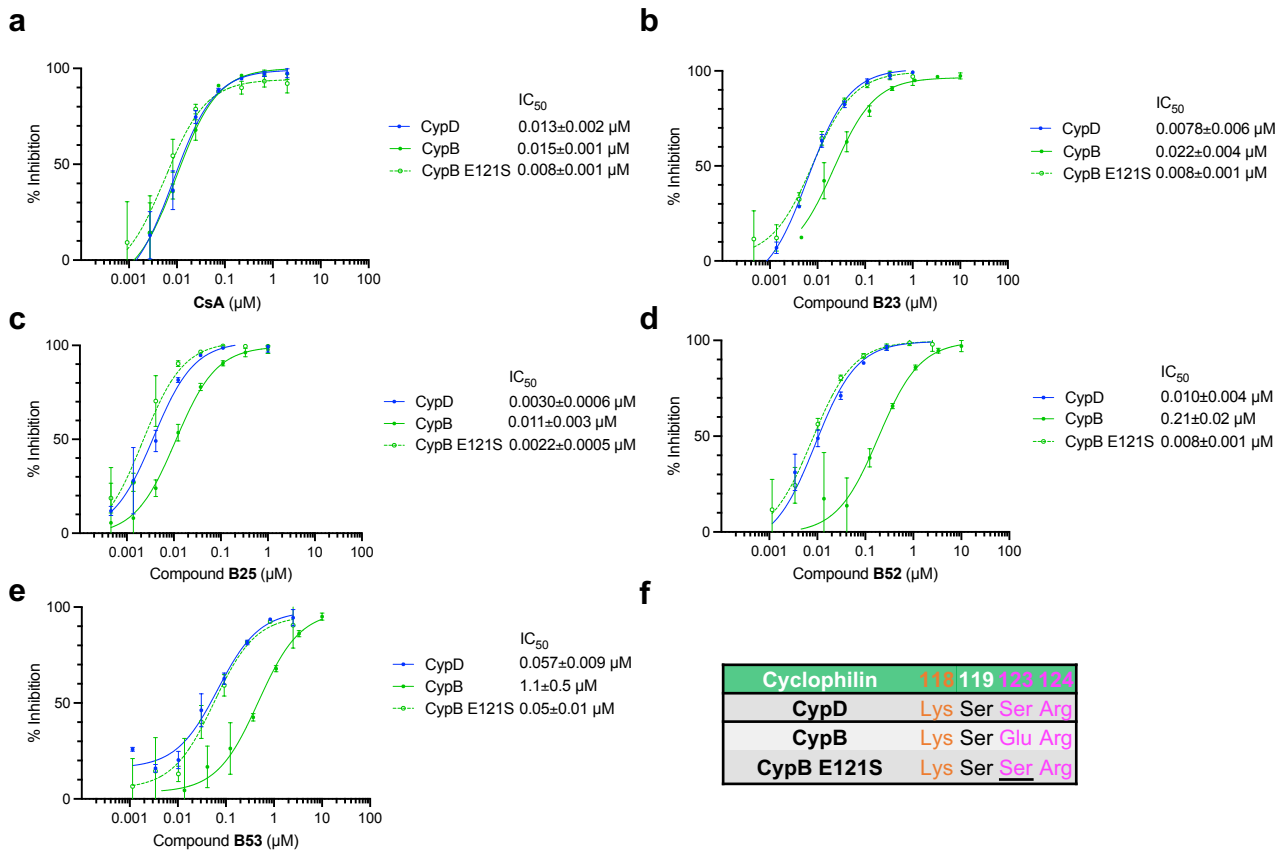

**Supplementary Figure 19 | The CypB E121S gatekeeper mutant is inhibited more potently compared to wild-type CypB by carboxylate-containing inhibitors.** Dose response curves of CypD, CypB, and CypB E121S, shown for **a**, **CsA**; **b**, **B23**; **c**, **B25**; **d**, **B52**; and **e**, **B53**. **f**, List of residues on the far side of the S2 pocket of cyclophilins that are proximal to ligand carboxylates, with the CypB mutation underlined. **CsA** as an active site ligand does not show appreciable differences in potency between wild-type cyclophilins and the tested cyclophilin mutants. For carboxylate-containing inhibitors, wild-type CypB shows attenuated potency compared to wild-type CypD. Carboxylate-containing compounds inhibit wild-type CypD and CypB E121S equipotently, as this CypB mutant contains S2 pocket residues that mimic those in CypD's S2 pocket. For wild-type CypD and CypB IC<sub>50</sub> data with **B52** and **B53**, values reflect mean±SD of four independent replicates (each comprising three technical replicates). Graphs show a representative single independent replicate (Independent replicate 1 is shown, containing three technical replicates) with data points and error bars reflecting mean±SD of individual assays at one dose. Further independent replicates are shown in Supplementary Fig. 18b-c. All other IC<sub>50</sub> values reflect mean±SEM of three technical replicates, with data points and error bars reflecting mean±SD of individual assays at one dose.

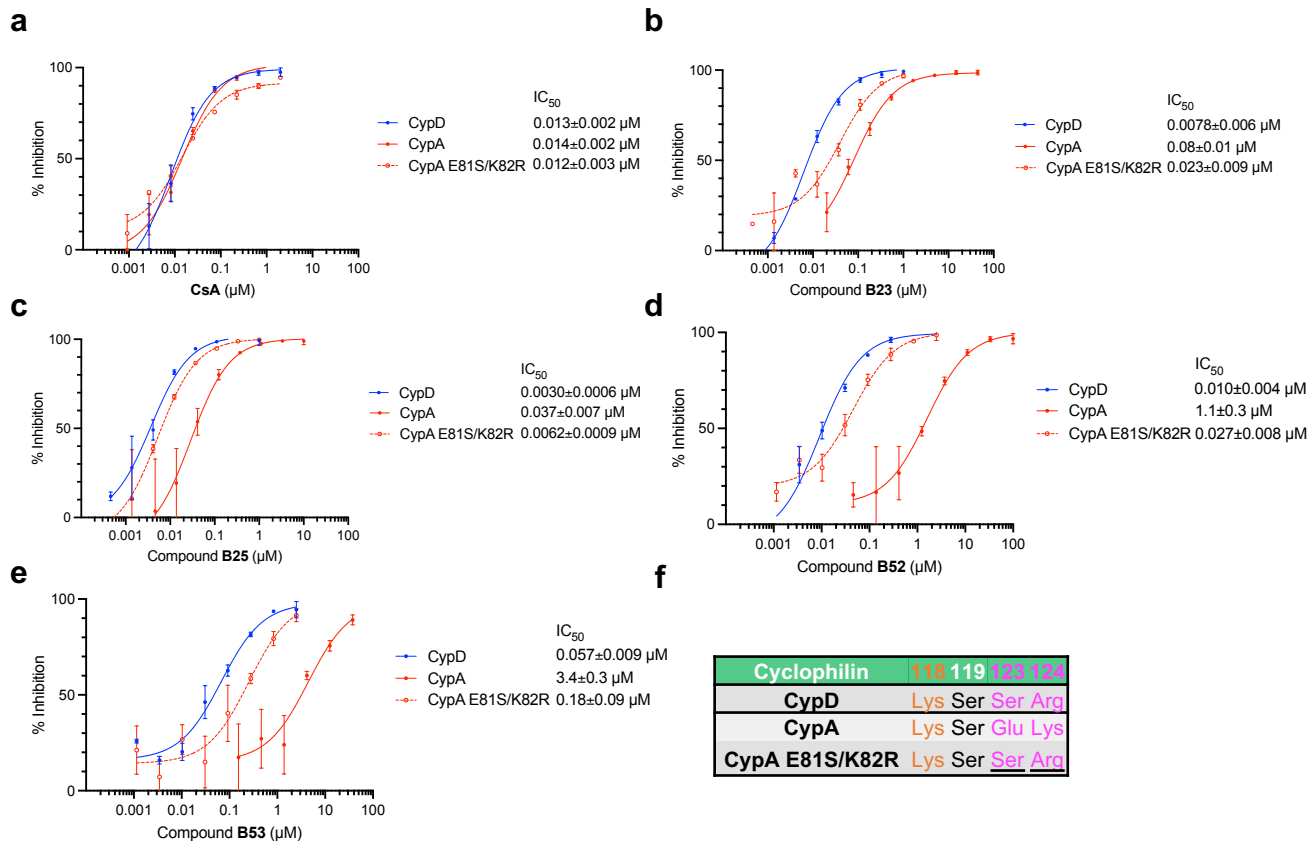

**Supplementary Figure 20 | The CypA E81S/K82R gatekeeper mutant is inhibited more potently compared to wild-type CypA with carboxylate-containing inhibitors. Dose response curves of CypD, CypA, and CypA E81S/K82R, shown for a, CsA; b, B23; c, B25; d, B52; e, B53. f, List of residues on the far side of the S2 pocket of cyclophilins that are proximal to the ligand carboxylates, with CypA mutations underlined. CsA as an active site ligand does not show appreciable changes in potency between the wild-type cyclophilins and mutants. For carboxylate-containing inhibitors, wild-type CypA shows attenuated potency compared to wild-type CypD. Carboxylate-containing compounds inhibit wild-type CypD and CypA E81S/K82R equipotently, as this CypA mutant contains S2 pocket residues that mimic those in CypD's S2 pocket. For CypD and CypA wild-type IC<sub>50</sub> data with B52 and B53, values reflect mean±SD of four independent replicates (each comprising three technical replicates). Graphs show a representative single independent replicate (Independent replicate 1 shown, containing three technical replicates) with data points and error bars reflecting mean±SD of individual assays at one dose. Further independent replicates are shown in Supplementary Fig. 18b-c. All other IC<sub>50</sub> values reflect mean±SEM of three technical replicates, with data points and error bars reflecting mean±SD of individual assays at one dose.**



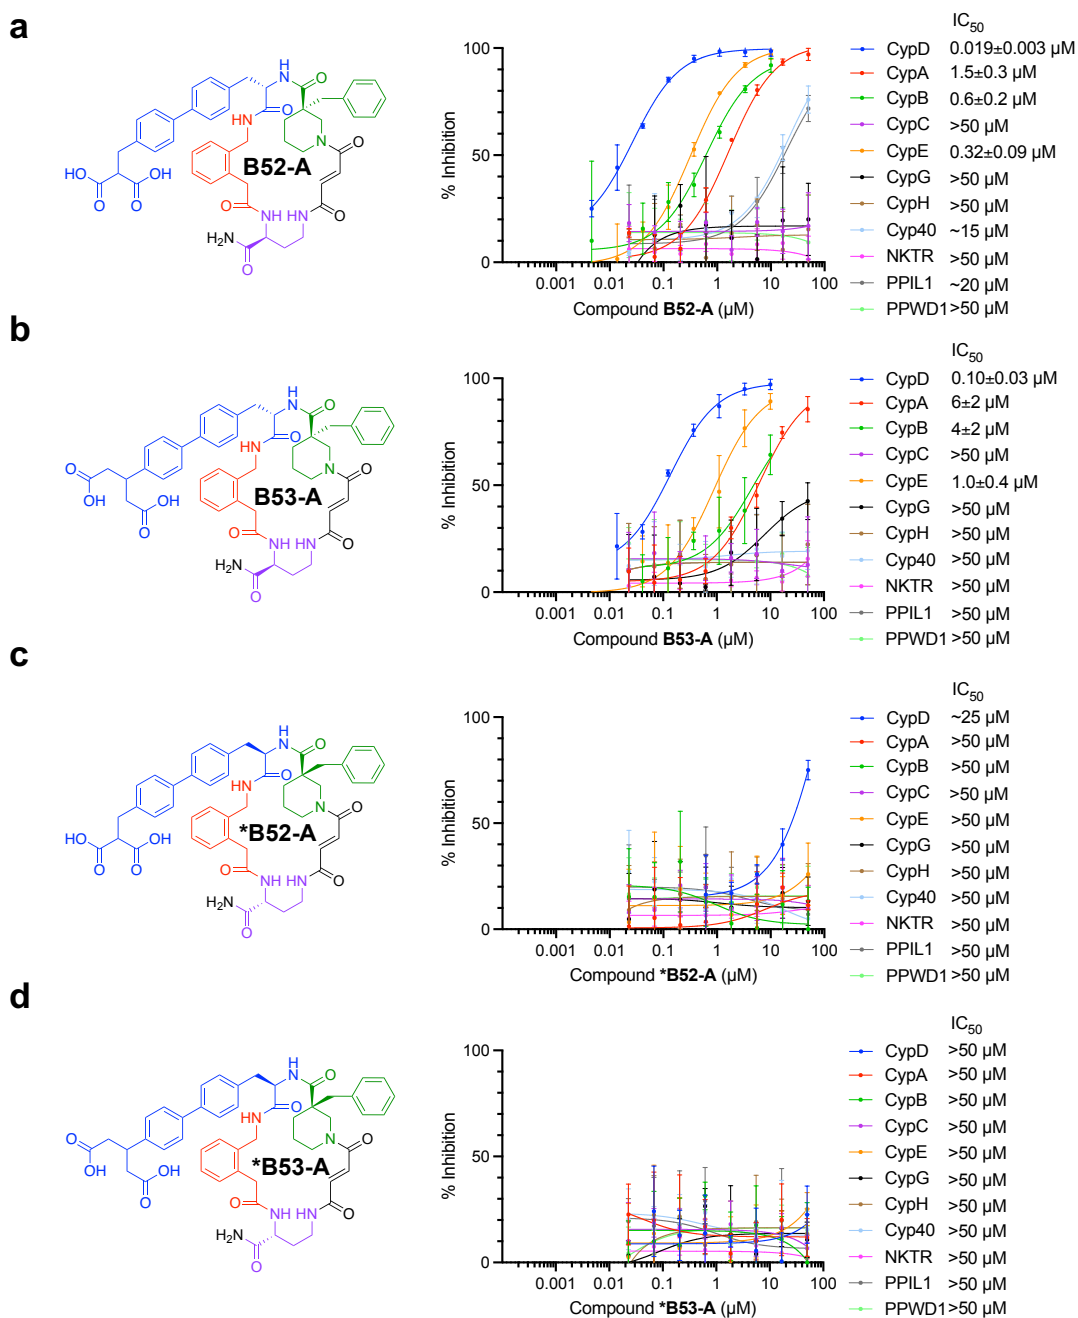

**Supplementary Figure 21 | Prolyl isomerase inhibition of additional CypD-selective inhibitors.** Structure and cyclophilin inhibition dose response data for **a**, **B52-A**; **b**, **B53-A**; **c**, **\*B52-A**; and **d**, **\*B53-A**. **B52-A** and **B53-A** retain the same selectivity profile as their associated analogs **B52** and **B53**, respectively, with a 2- to 3-fold decrease in potency. Enantiomers **\*B52-A** and **\*B53-A** show no substantial inhibition activity on any cyclophilins tested. IC<sub>50</sub> values reflect mean±SEM of three technical replicates. Data points and error bars reflect mean±SD of individual assays at one dose.

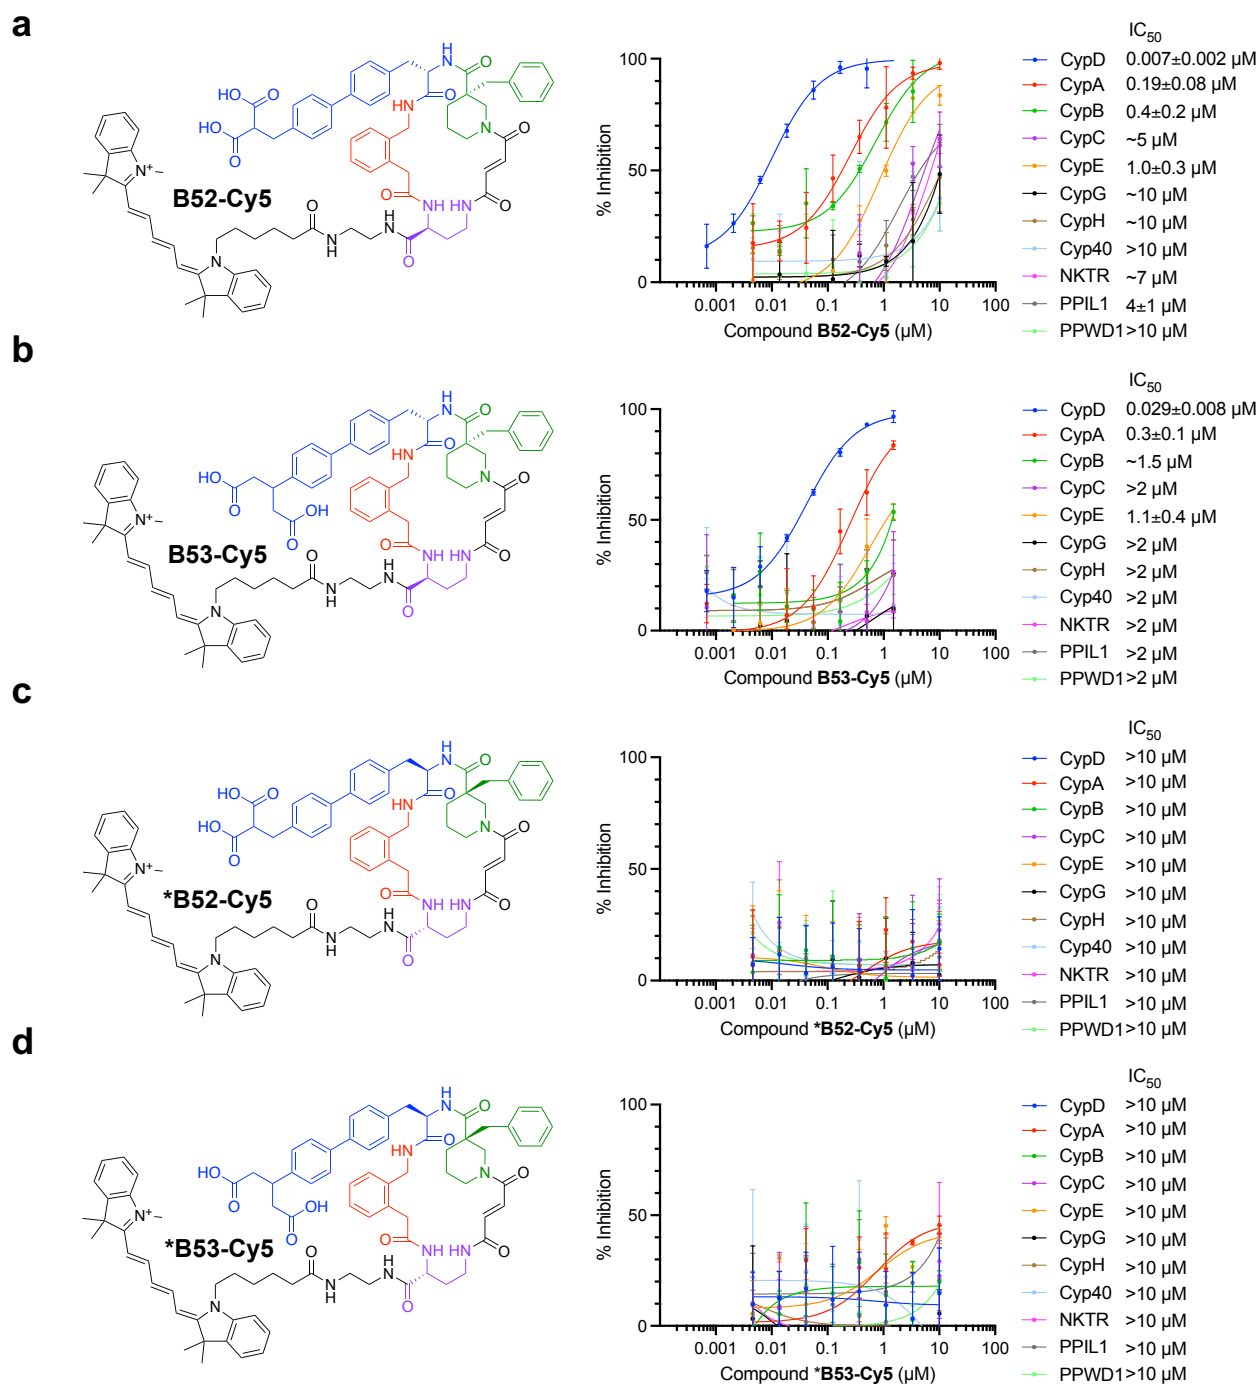

**Supplementary Figure 22 | Prolyl isomerase inhibition by CypD-selective inhibitors used in mitochondrial models of mPTP.** Structure and cyclophilin inhibition dose response data for **a**, B52-Cy5; **b**, B53-Cy5; **c**, \*B52-Cy5; and **d**, \*B53-Cy5. B52-Cy5 and B53-Cy5 retain the same selectivity profile as their associated analogs, B52 and B53, respectively. Enantiomers \*B52-Cy5 and \*B53-Cy5 show no substantial inhibition profile on any cyclophilins tested. IC<sub>50</sub> values reflect mean±SEM of three technical replicates. Data points and error bars reflect mean±SD of individual assays at one dose.

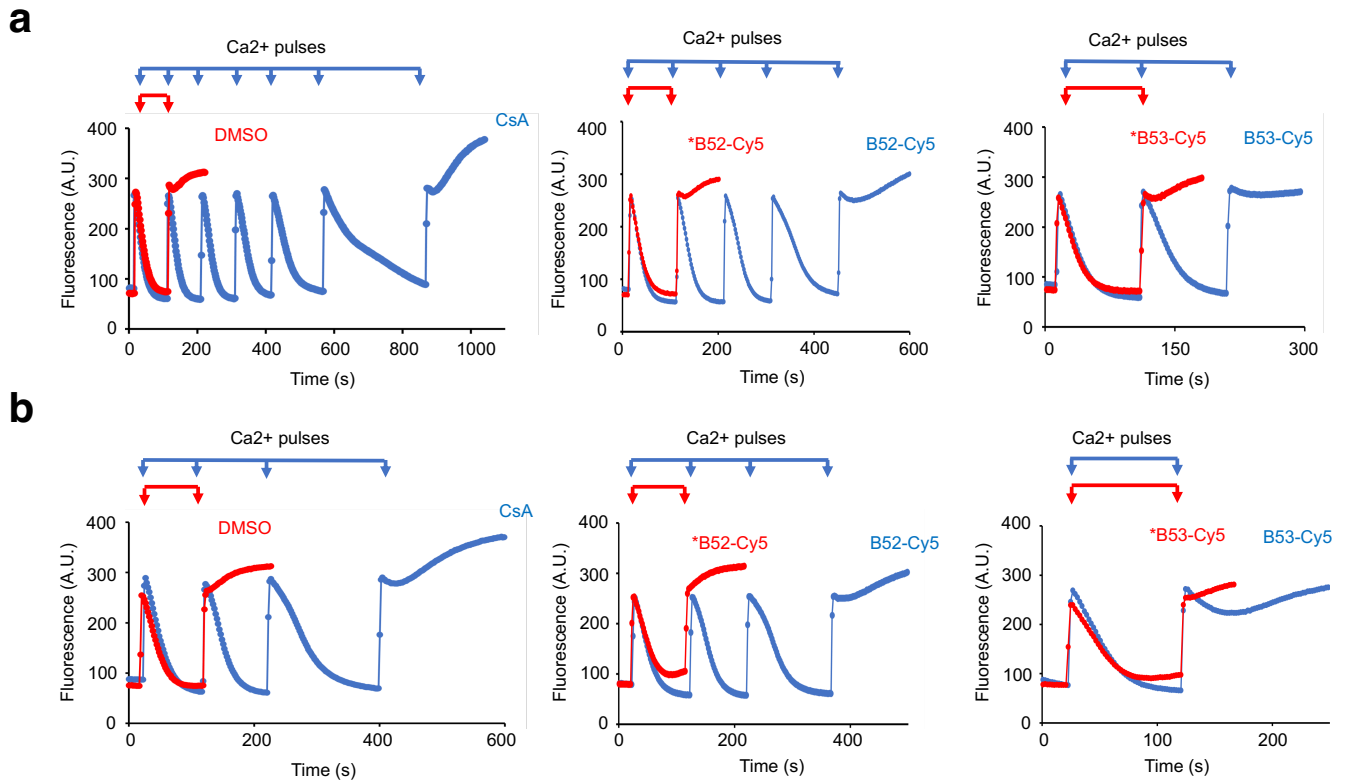

**Supplementary Figure 23 | Additional independent replicates of calcium retention assays in mitochondria.** The calcium retention capacity was determined in additional preparations of isolated mouse liver mitochondria (0.5  $\mu\text{g}/\text{mL}$ ) in response to pulses of 60  $\mu\text{M}$   $\text{CaCl}_2$  in the presence of the indicated CypD inhibitors (or inactive enantiomers). Concentrations used were 2  $\mu\text{M}$  **CsA**, 10  $\mu\text{M}$  **B52-Cy5**, 10  $\mu\text{M}$  **\*B52-Cy5**, 20  $\mu\text{M}$  **B53-Cy5**, and 20  $\mu\text{M}$  **\*B53-Cy5**. Mitochondrial uptake of extra-mitochondrial  $\text{Ca}^{2+}$  was assessed by monitoring the fluorescence of Calcium-green 5n, depicted in arbitrary units (A.U.). The rapid increase in fluorescence after several pulses of  $\text{Ca}^{2+}$  are taken up corresponds to mitochondrial  $\text{Ca}^{2+}$  release via mPTP. **a** All assays performed on the same mitochondrial preparation and day. **b**, All assays performed on a different mitochondrial preparation and day.

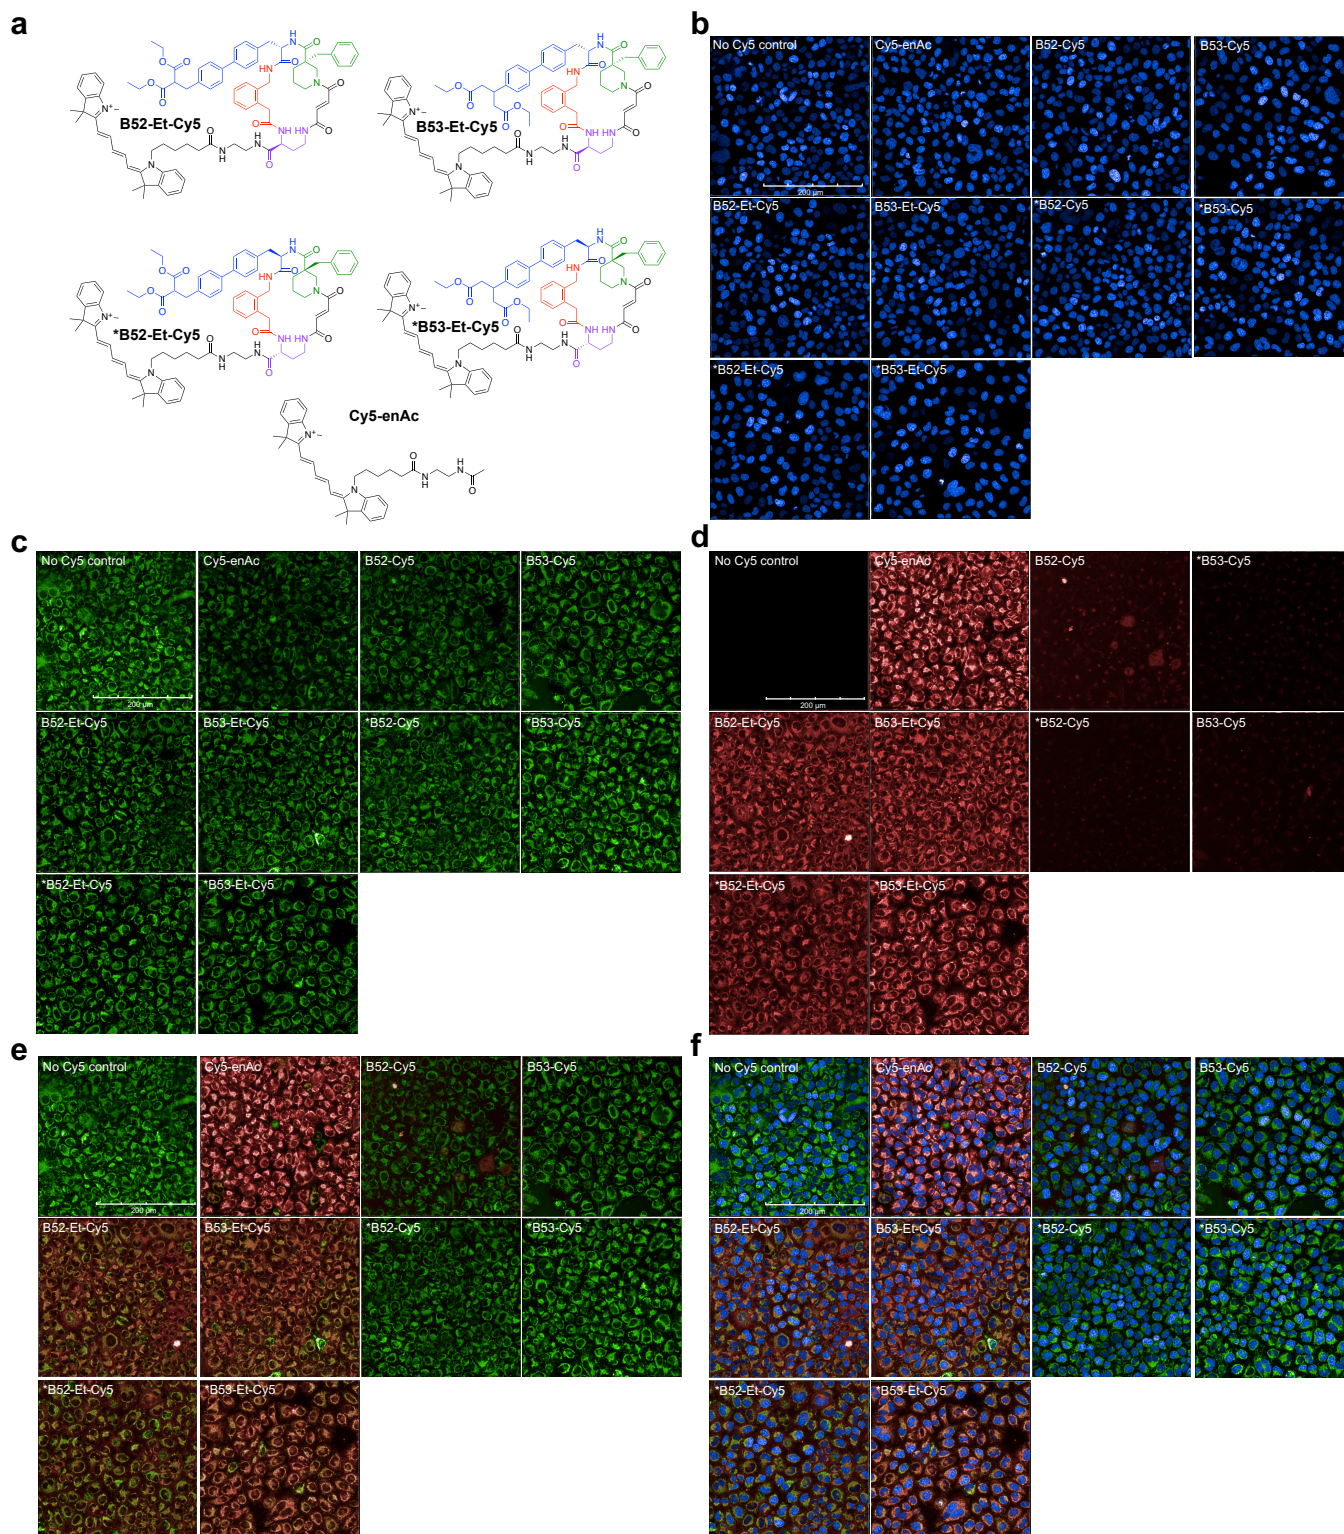

**Supplementary Figure 24 | Representative images of Cy5-conjugated CypD inhibitor localization in HeLa cells.** HeLa cells were co-treated with Cy5 conjugated compounds shown in (a) and Supplemental Fig. 22, and co-stained with Mitotracker Green, Hoechst 33342 and imaged by fluorescence microscopy. Images include the following channels; **b**, Hoechst 33342 nuclear stain; **c**, Mitotracker Green mitochondrial stain; **d**, Deep red channel showing Cy5-

conjugated compound; **e**, overlay of Mitotracker Green and Cy5 channels; **f**, overlay of Hoechst 33342, Mitotracker Green, and Cy5 channels. **Cy5-enAc** (and ester derivatives **B52-Et-Cy5**, **B53-Et-Cy5**, **\*B52-Et-Cy5**, and **\*B53-Et-Cy5** show both good mitochondrial localization via overlap with Mitotracker Green and sufficient mitochondrial fluorescence. In contrast, dicarboxylate derivatives **B52-Cy5**, **B53-Cy5**, **\*B52-Cy5**, and **\*B53-Cy5** show poor mitochondrial localization and fluorescence. Microscopy images shown are a representative image of three technical replicates. Scale bars, 200  $\mu\text{m}$ .

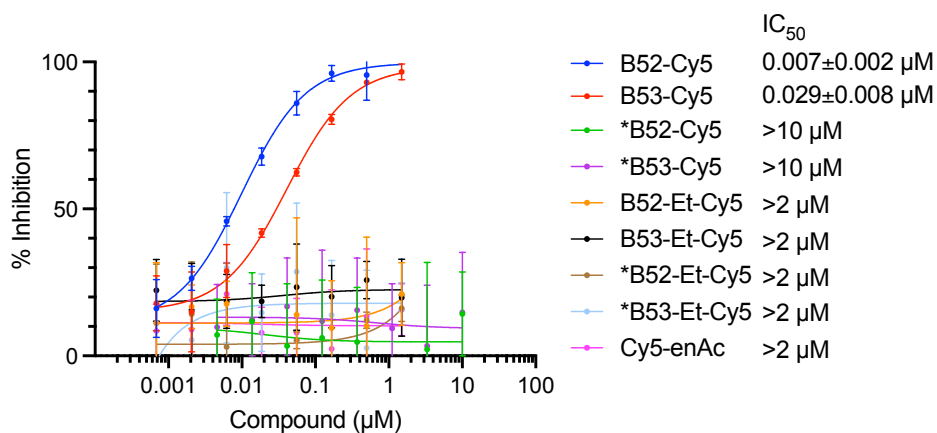

**Supplementary Figure 25 | CypD inhibition of Cy5-conjugated CypD inhibitors.** CypD prolyl-isomerase inhibition of Cy5-conjugated compounds is shown. Only compounds with correct stereochemistry and exposed dicarboxylate moieties are potent CypD inhibitors. **Cy5-enAc** alone does not inhibit CypD. IC<sub>50</sub> values reflect mean ± SEM of three technical replicates. Data points and error bars reflect mean ± SD of individual assays at one dose.

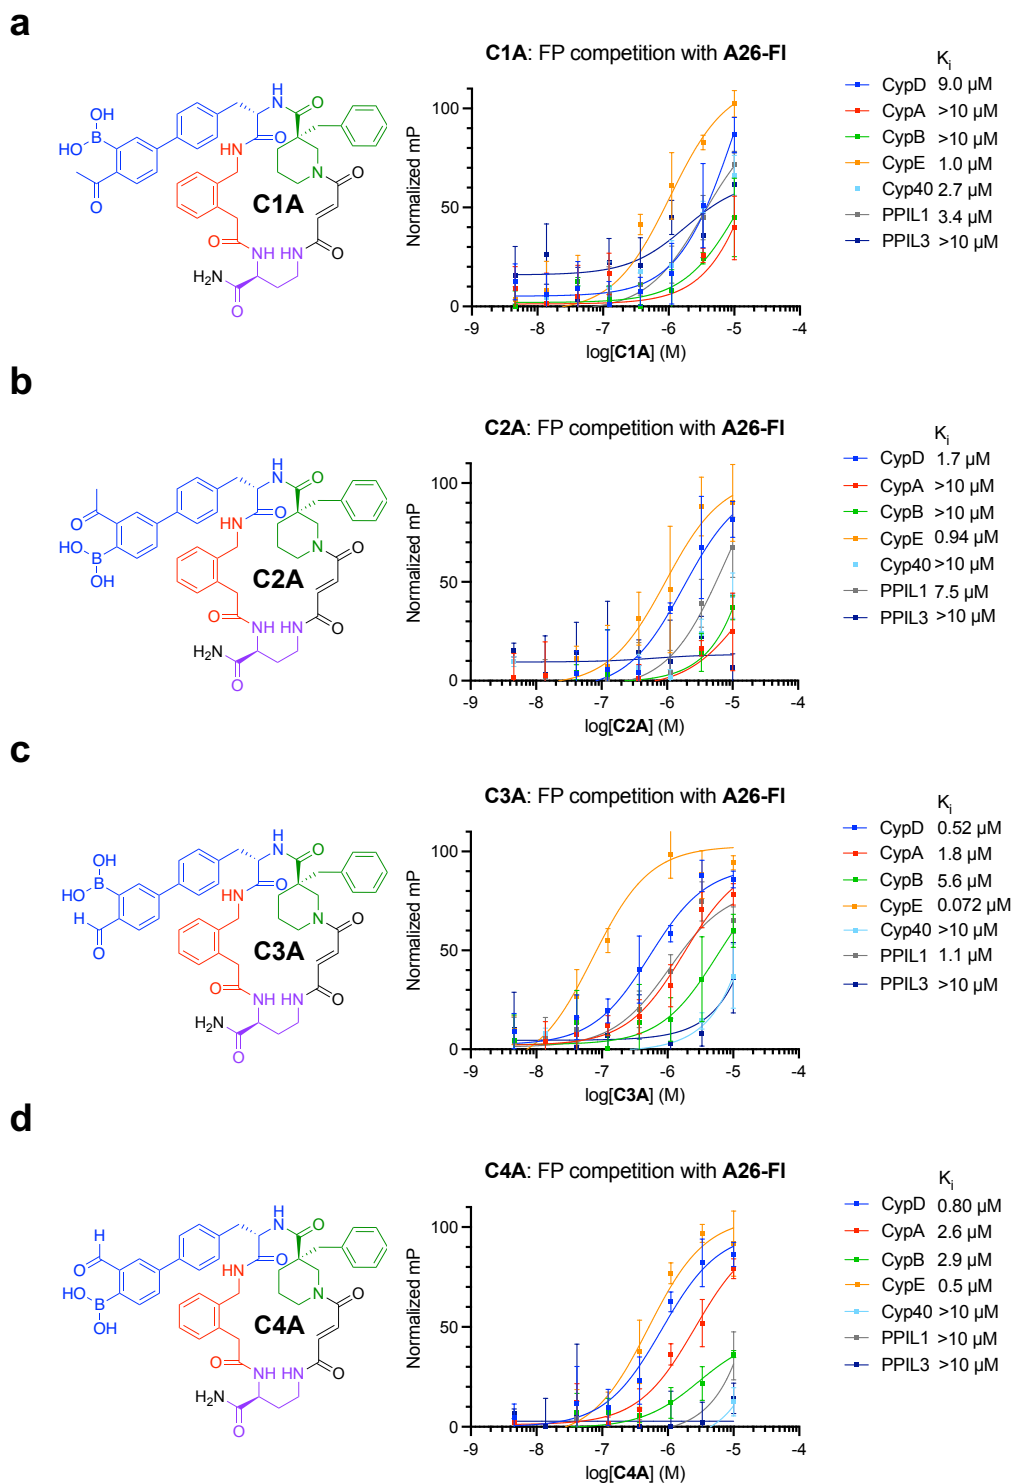

**Supplementary Figure 26 | Fluorescence polarization competition with A26-FI against lysine-containing cyclophilins.** Structure and FP competition with 0.5 nM A26-FI dose response data for **a**, C1A; **b**, C2A; **c**, C3A; and **d**, C4A. C3A shows selectivity for CypE, while regioisomer C4A and acetyl derivatives C1A and C2A show attenuated binding to CypE. Y-axes are normalized to internal control wells containing A26-FI only (100%) and A26-FI with cyclophilin (0%). Data points and error bars reflect mean $\pm$ SD of three technical replicates.  $K_i$  values reflect the mean of three technical replicates.

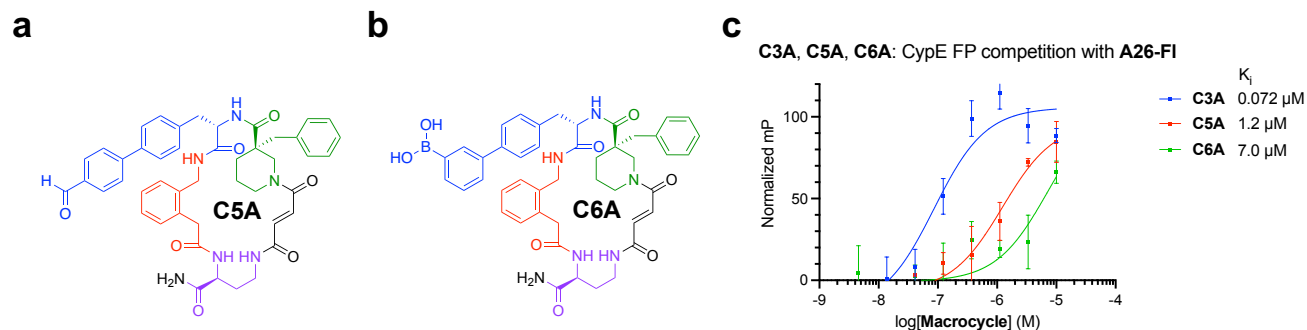

**Supplementary Figure 27 | Fluorescence polarization competition with A26-FI against CypE with control compounds C5A and C6A.** Structures of compounds **a**, **C5A**; and **b**, **C6A**. **c**, Dose response of **C3A**, **C5A**, and **C6A** against CypE. Removal of either the aldehyde or boronic acid from **C3A** results in attenuated inhibition of CypE. Y-axes are normalized to internal control wells containing **A26-FI** only (100%) and **A26-FI** with cyclophilin (0%). Data points and error bars reflect mean $\pm$ SD of three technical replicates.  $K_i$  values reflect mean of three technical replicates.



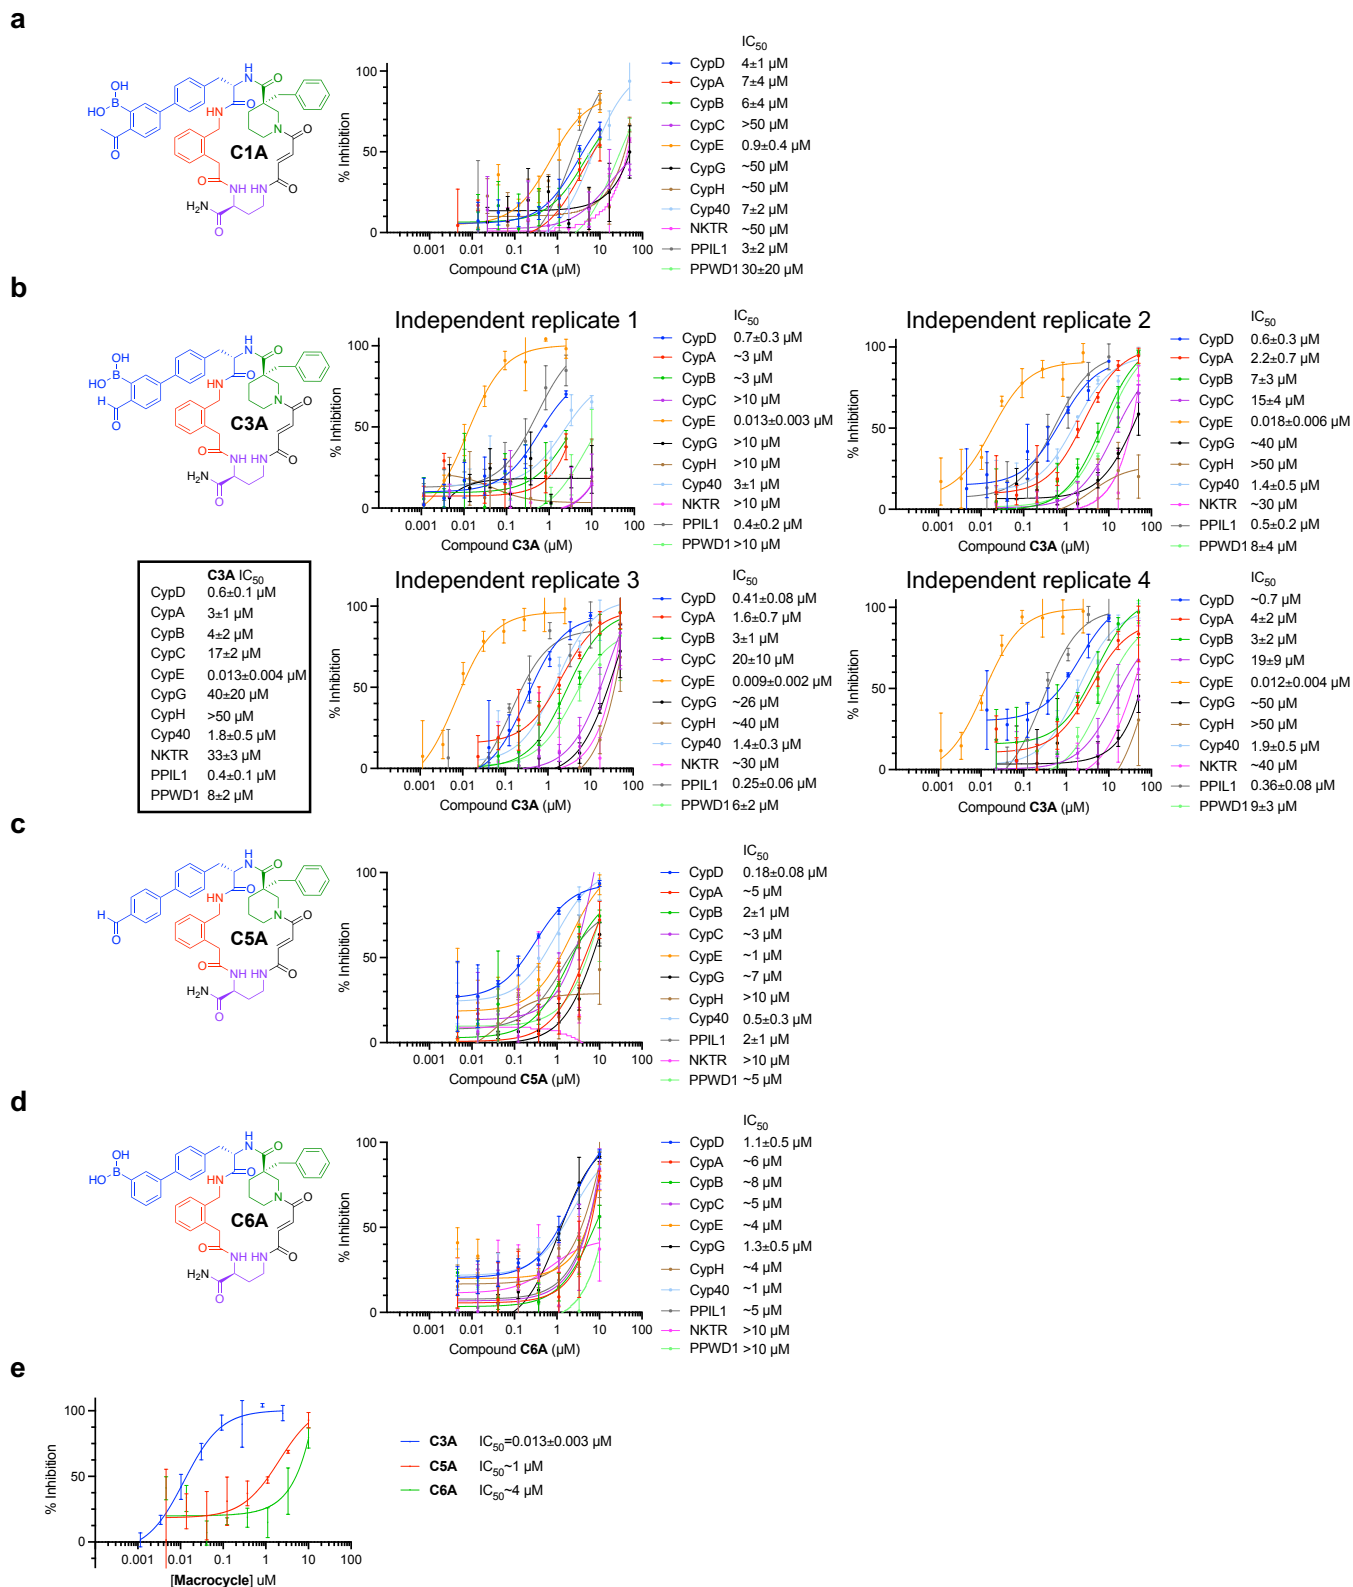

### Supplementary Figure 28 | Prolyl isomerase inhibition by C1A, C3A, C5A, and C6A.

Structure and cyclophilin inhibition dose response data for **a**, C1A; **b**, C3A; **c**, C5A; and **d**, C6A.

C3A shows good selectivity and potency for CypE, while retaining only the aldehyde in C4A or the boronic acid in C5A results in loss in CypE potency and promiscuous cyclophilin inhibition.

Replacing the aldehyde with an acetyl group in **C1A** also results in loss of potency and selectivity for CypE. **e**, Dose response curves of **C3A**, **C4A**, and **C5A** against CypE, showing the necessity of both parts of the covalent warhead for CypE potency. For **C3A**, four independent replicates (each comprising three technical replicates) are shown, with their respective fitted values that reflect mean $\pm$ SEM of three technical replicates. Data points and error bars reflect mean $\pm$ SD of individual assays at one dose. Table shows final reported IC<sub>50</sub> values that reflect mean $\pm$ SD of four independent replicates for CypD, CypA, CypB, CypE, Cyp40 and PPIL1, and mean $\pm$ SD of three independent replicates (Independent replicates 2-4) for CypC, CypG, CypH, NKTR, and PPWD1. Table IC<sub>50</sub> values are used for the entirety of this work. Independent replicate 1 was collected with a separately synthesized compound batch than was used in independent replicates 2, 3, and 4.

**a**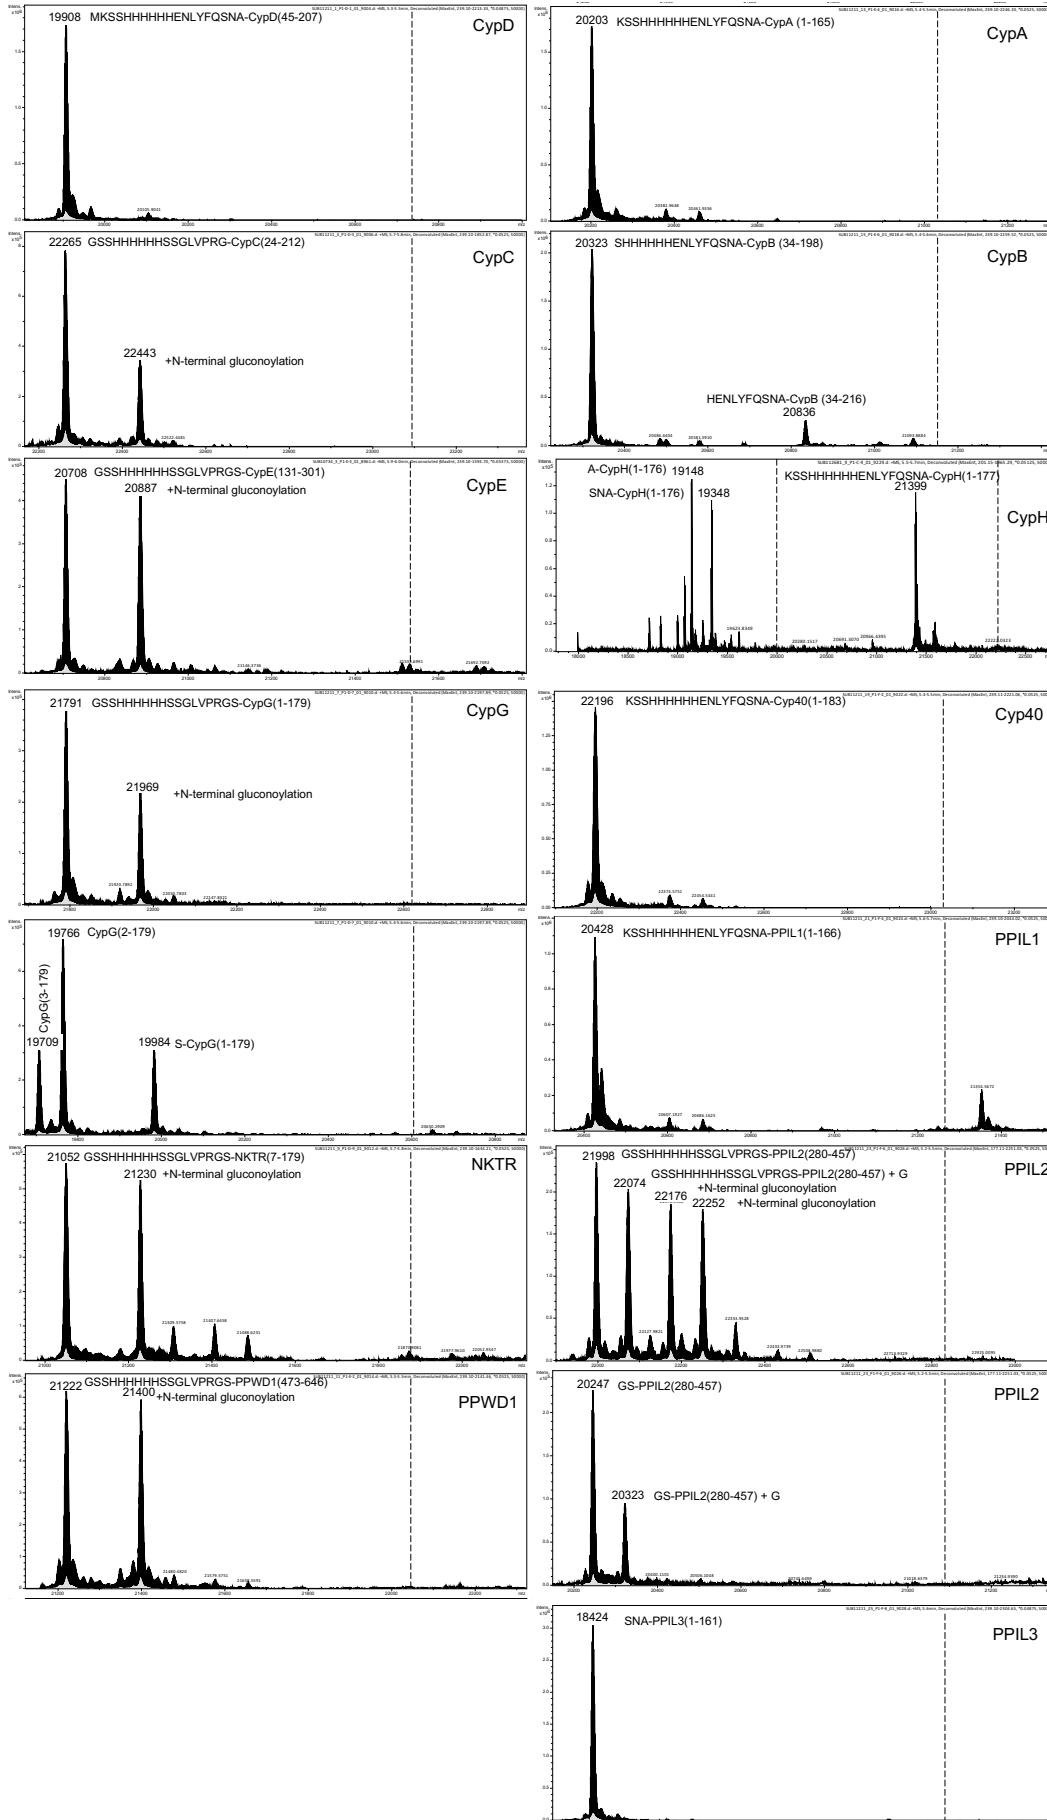

**b**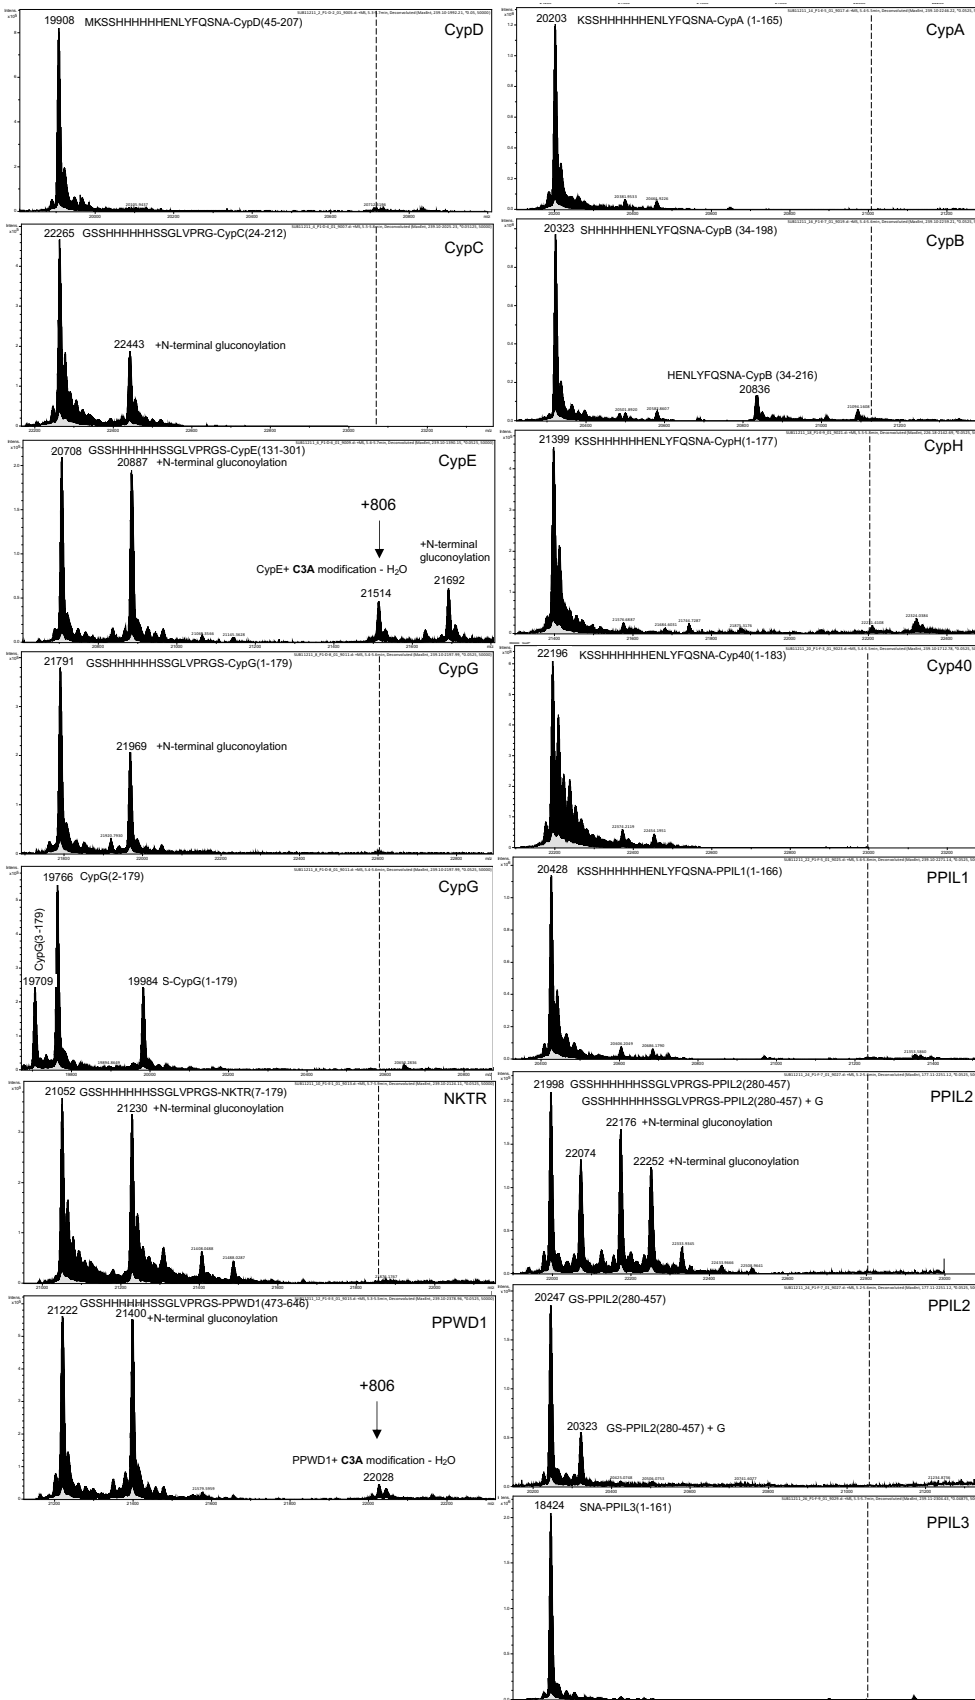

**Supplementary Figure 29 | Mass spectroscopy analysis of C3A covalent modification on 13 cyclophilins. a, Mass spectroscopy analysis of lysine covalent modification and b, after**

treatment with NaCNBH<sub>3</sub> to trap iminoboronate as lysine-modified secondary amine, highlighting relevant m/z regions. Primary protein peaks are shown along with expected region of **C3A** modification (+824: **C3A** modification non-reductive, represented as a dashed line for the most abundant ion peak(s) in panel **a**, +806: **C3A** –H<sub>2</sub>O reductive amination covalent adduct, represented as a dashed line on cyclophilins with no observed covalent modification for the most abundant ion peak in panel **b**). We observed small amounts of covalent modification for PPWD1, however with a diminished peak intensity compared to CypE's +806 covalent adduct, suggesting minimal adduct formation in solution. We observed some C-terminal truncation for CypB of residues that are not anticipated to affect active site or S2 pocket integrity, prolyl-isomerase catalytic activity, or inhibitor binding. We also observed a mixture of CypH, CypG and PPIL2 constructs that include various cleaved and non-cleaved His-tag forms, with representative mass spectra shown for each primary peak. N-terminal His-tag or cleaved cyclophilin constructs are not anticipated to affect active site or S2 pocket integrity, prolyl-isomerase catalytic activity, or inhibitor binding. Various recombinantly expressed constructs show N-terminal gluconoylation. Some proteins when co-treated with NaCNBH<sub>3</sub> showed +14 mass off the primary peak not present in non-reductive conditions (see CypC, CypH, NKTR, Cyp40, and PPIL1) suggesting various methylation events via reductive amination.

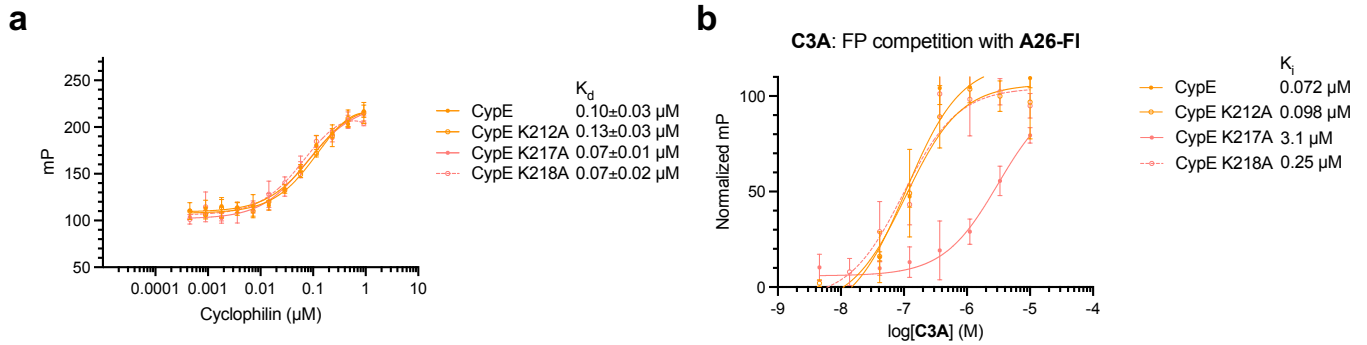

**Supplementary Figure 30 | CypE mutant FP analysis. a**, Protein titration against 0.5 nM **A26-FI**.  $K_d$  values and error bars reflect mean $\pm$ SEM of three technical replicates. Data points and error bars reflect SD of individual assays at one dose. **b**, FP competition with 0.5 nM **A26-FI** dose response data **C3A** CypE proteins. **C3A** has significantly attenuated binding for only the K217A mutant compared to wild-type. Y-axes are normalized to internal control wells containing **A26-FI** only (100%) and **A26-FI** with cyclophilin (0%). Data points and error bars reflect mean $\pm$ SD of three technical replicates.  $K_i$  values reflect the mean of three technical replicates.

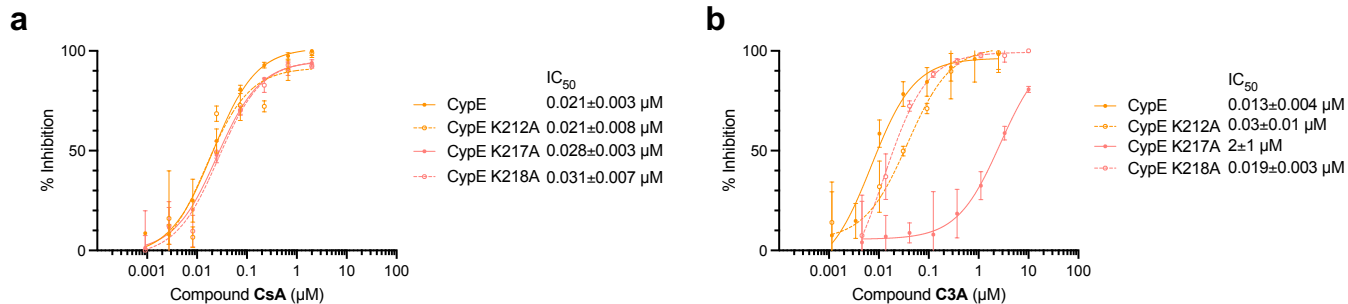

**Supplementary Figure 31 | Prolyl isomerase inhibition screening of CypE lysine mutants reveals K217 residue as site of C3A covalent modification.** Dose response curves of CypD, CypE K212A, CypE K217A, and CypE K218A shown for **a**, **CsA** and **b**, **C3A**. **CsA** as an active site ligand does not show appreciable differences in potency between wild-type CypE and the tested CypE mutants. Loss of **C3A** inhibition potency for only the K217A mutant compared to wild-type or K212A and K218A mutants verifies that K217 is the being covalently modified by **C3A**. For wild-type CypE IC<sub>50</sub> data with **C3A**, values reflect mean±SD of four independent replicates (each comprising three technical replicates). Graphs show a representative single independent replicate (Independent replicate 3 is shown, containing three technical replicates) with data points and error bars reflecting mean±SD of individual assays at one dose. Further independent replicates are shown in Supplementary Fig. 28b. All other IC<sub>50</sub> values reflect mean±SEM of three technical replicates, with data points and error bars reflecting mean±SD of individual assays at one dose.

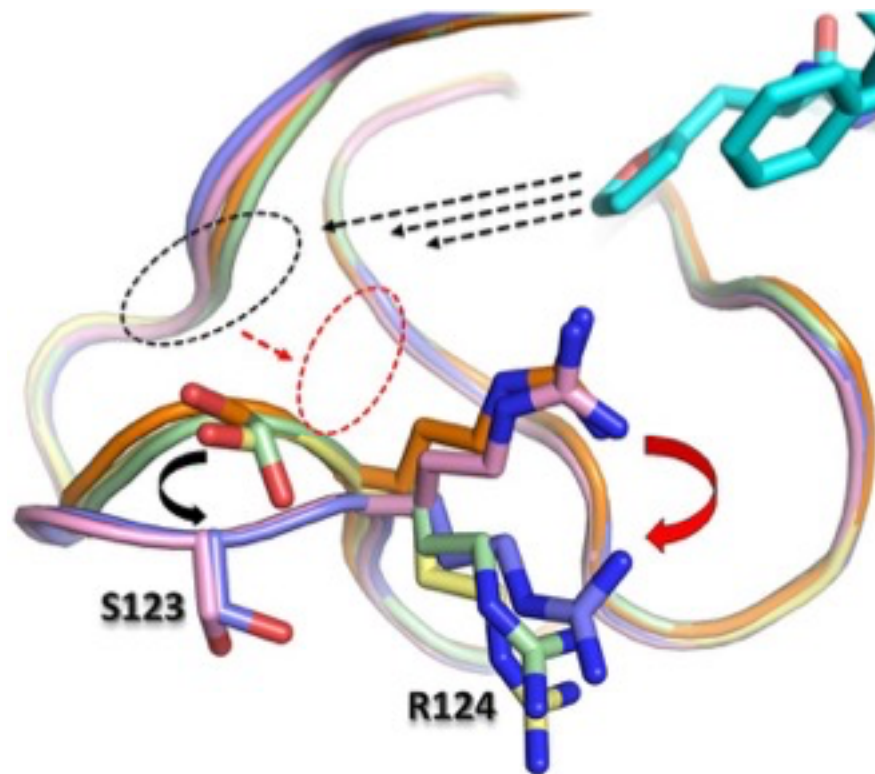

**Supplementary Figure 32 | Ligand-dependent conformation of primary gatekeeper residues S123 and R124 in the S2 pocket.** Superposition of co-crystal structures containing various inhibitors bound to CypD. **A26** co-crystal structure (orange) shown along with **A26** (cyan) as a reference for gatekeeper positions, shows little influence of ligand on residue conformation. Binding deeper into the S2 pocket (black arrows and circle) with larger carboxylate-containing ligands such as **B25** (pink) causes the S123 containing loop region to flip outwards of the pocket. Binding deeper and out of the pocket (red circles and arrows) causes the R124 residue to flip out of the pocket, shown by **B1** (green) and **B21** (yellow). Dicarboxylate-containing ligands such as **B53** (purple) exhibit conformational change of both the S123 loop as well as the side-chain of R124.



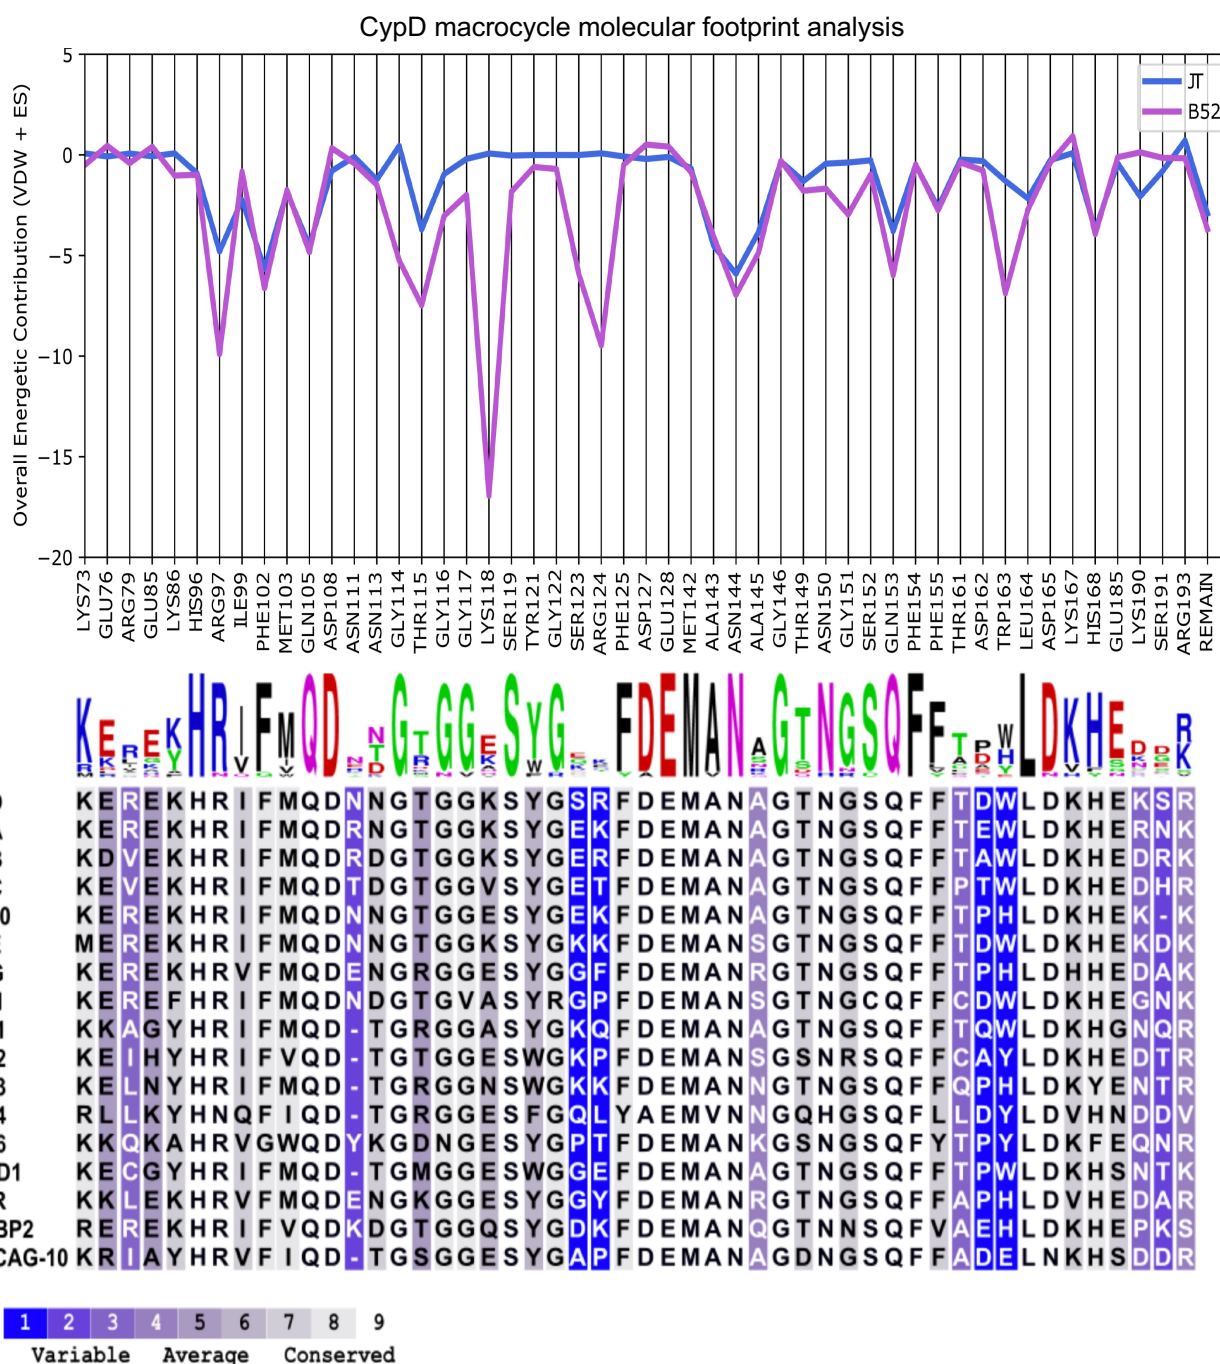

**Supplementary Figure 33 | Molecular footprinting analysis demonstrates that key binding interactions of B52 are unique to CypD.** Graph of the predicted overall energetic contribution (sum of Van der Waals and electrostatic energy) of the top fifty contributing residues in CypD to compounds **JOMBt** and **B52** aligned with a sequence alignment and web logo of all 17 human cyclophilins. Energetic contributions calculated using footprinting function in DOCK6.9. Coloring scheme of sequence alignment corresponds to sequence conservation score as calculated by the ConSurf webserver (<https://consurf.tau.ac.il/>). Note, this analysis shows R124 as a contributing residue for **B52** binding, in contrast to CypD mutant data, which suggested that this residue does not interact with **B52**. But we attribute this discrepancy to **B52**'s observed hydrogen bond with backbone atoms between S123 and R124, instead of side-chain moieties.

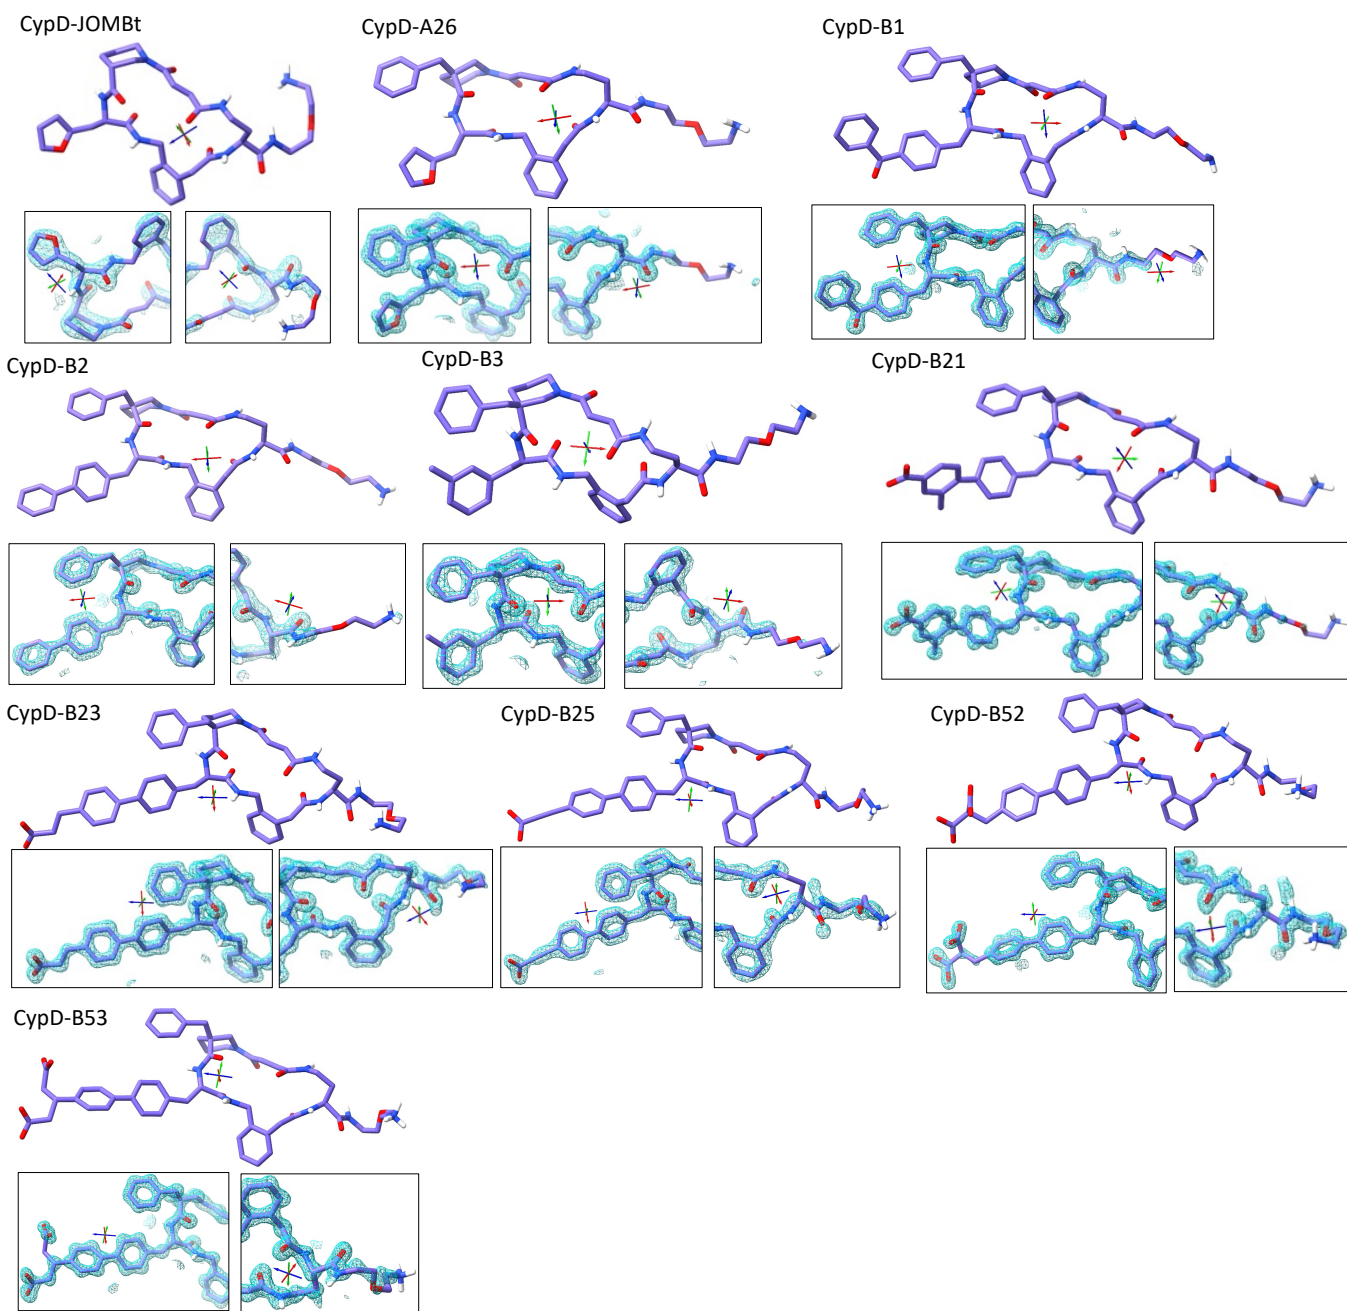

**Supplementary Figure 34 | Electron densities of ligands from CypD-inhibitor co-crystal structures**

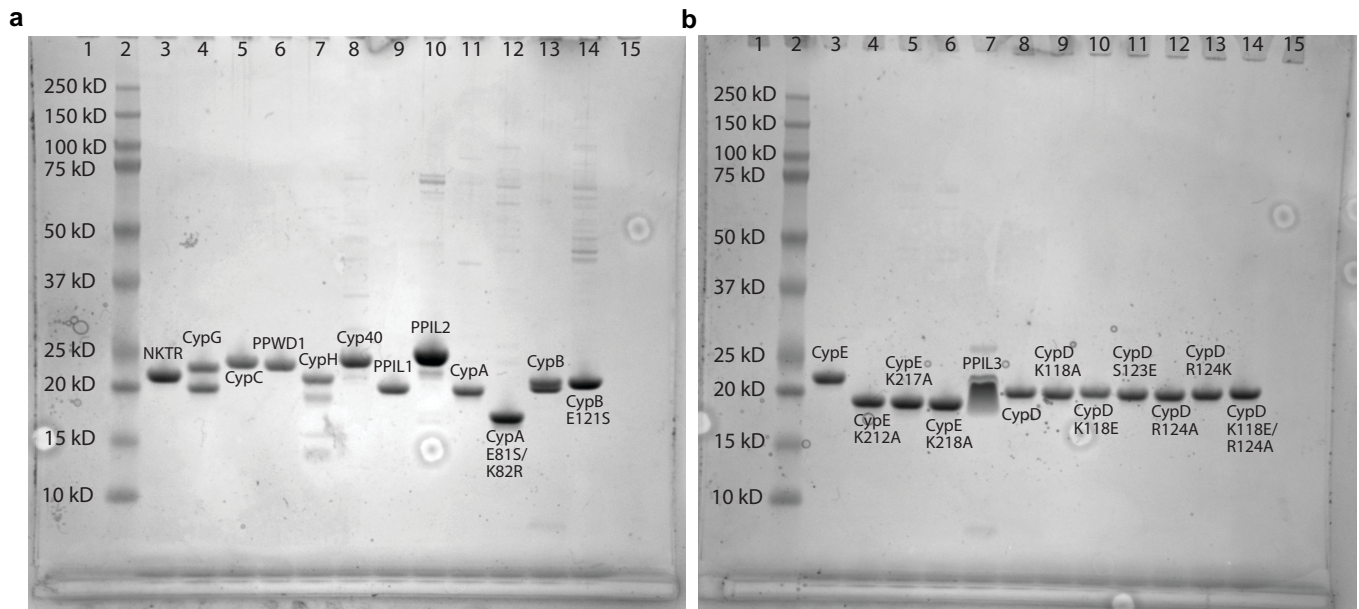

**Supplementary Figure 35 | SDS-PAGE of recombinantly expressed cyclophilin proteins.**

**a**, The gel shows representative samples of the following:

Lane 1-Blank;

Lane-2: Protein Ladder;

Lane 3- GSSHHHHHHSSGLVPRGS-NKTR(7-179);

Lane 4-Mixture of GSSHHHHHHSSGLVPRGS-CypG(1-179), S-CypG(1-179), CypG(2-179), CypG(3-179), see Supplementary Figure 29 for confirmation of mixture;

Lane 5- GSSHHHHHHSSGLVPRG-CypC(24-212);

Lane 6- GSSHHHHHHSSGLVPRGS-PPWD1(473-646);

Lane 7- Mixture of KSSHHHHHHENLYFQSNA-CypH(1-177), A-CypH(1-176), and SNA-CypH(1-176), Supplementary Figure 29 for confirmation of mixture;

Lane 8-KSSHHHHHHENLYFQSNA-Cyp40(1-183);

Lane 9- KSSHHHHHHENLYFQSNA-PPIL1(1-166);

Lane 10- Mixture of GS-PPIL2(280-457), GSSHHHHHHSSGLVPRGS-PPIL2(280-457), GS-PPIL2(280-457) + G, and GSSHHHHHHSSGLVPRGS-PPIL2(280-457) + G, see Supplementary Figure 29 for confirmation of mixture

Lane 11- KSSHHHHHHENLYFQSNA-CypA (1-165);

Lane 12- SNA-CypA E81S/K82R (1-165);

Lane 13- Mixture of SHHHHHHHENLYFQSNA-CypB (34-198) and HENLYFQSNA-CypB (34-216); see Supplementary Figure 29 for confirmation of mixture

Lane 14- SNA-CypB E121S (34-216);

Lane 15-blank

**b**, The gel shows representative samples of the following:

Lane 1-Blank;

Lane-2: Protein Ladder;

Lane 3- GSSHHHHHHSSGLVPRGS-CypE(131-301);

Lane 4- GS-CypE K212A (131-301);

Lane 5- GS-CypE K217A (131-301);

Lane 6- GS-CypE K218A (131-301);

Lane 7- SNA-PPIL3(1-161);

Lane 8- MKSSHHHHHHENLYFQSNA-CypD(45-207);

Lane 9- MKSSHHHHHHENLYFQSNA-CypD K118A (45-207);  
Lane 10- MKSSHHHHHHENLYFQSNA-CypD K118E (45-207);  
Lane 11- MKSSHHHHHHENLYFQSNA-CypD S123E (45-207);  
Lane 12- MKSSHHHHHHENLYFQSNA-CypD R124A (45-207);  
Lane 13- MKSSHHHHHHENLYFQSNA-CypD R124K (45-207);  
Lane 14- MKSSHHHHHHENLYFQSNA-CypD K118E/R124A (45-207);  
Lane 15-blank.

All wild-type recombinant proteins were also verified by LC-MS through experiments conducted in Supplemental Figure 29.

## Supplementary Note 1

### Python Scripts

#### *Analysis of CypD selection high-throughput sequencing data*

a few notes about this code:

- \* assumes your files fastq files are all unzipped (not fastq.gz's) and in the same folder
- \* set your filepath and directory of this folder below
- \* assumes filenames follow the form 'proteinName\_L001\_R1\_001.fastq' (MiSeq output format).
- \* the 'S#' indices (e.g. S1) should be mapped to whatever variable bases are in the primer in a separate .csv (barcode keys.csv), saved in the same file as your fastq data (in the form ['S1' , 'TCACT']). these should be the first bases in each line of the sequence.
- \* don't put underscores in the sample filename, it messes up the regex to do the offset mapping (e.g. use input-library instead of input\_library)

```
""

import collections #for Counter
#import itertools
import glob #useful for getting all files in a directory
import os # for filepaths http://stackoverflow.com/questions/3964681/find-all-files-in-directory-with-extension-
txt-with-python
import re # for regex
import csv # for converting to/from csv
#import pandas # for dealing with arrays (calculating enrichments)

""

****CHANGE THE FILEPATH****

#first, find the sequence files, place filepath below
filepath = '---'
os.chdir(filepath) # sets the directory to look in

#dictionaries of anticodons
scaffolds={"TGGA": "A", "CAAC": "B", "TTAA": "C", "ACAA": "D",
"TGAG": "E", "TTCC": "F", "TATA": "G", "AAAT": "H",
"CTAC": "I", "TCTA": "J", "AAAC": "K", "AAAA": "L",
"CAAA": "M", "ACCT": "N", "TCCT": "O", "TTAC": "P",
"TAAT": "Q", "TAAC": "R", "AATC": "S", "CTAT": "T",
"TGAT": "U", "TTTT": "V", "CTTT": "W", "AATT": "X",
"TATC": "Y", "AACC": "Z", "TCAC": "UU", "CACA": "VV",
"CATT": "WW", "ACTT": "XX", "TATT": "YY", "TCTT": "ZZ"}

codons_1 = {"AAAGCC": "A", "AAGCCT": "B", "TTTGCC": "C", "GTTTCCT": "D",
"CATACG": "E", "CTCATG": "F", "TGTCTC": "G", "CTACAG": "H",
"CAGCTA": "I", "CTGAGA": "J", "AGCTCT": "K", "TGTTCCG": "L",
"AAGAGC": "M", "AGCAGA": "N", "GATCGA": "O", "TCAGTC": "P",
"TACTGC": "Q", "ATACGC": "R", "GATTCC": "S", "TGAAGC": "T"}
codons_2 = {"TTCAGC": "A", "ATCGAC": "B", "GCAATC": "C", "AAGTCC": "D",
"ATCCGT": "E", "ACTCGA": "F", "TCTTGC": "G", "CACAAG": "H",
"TTAGCC": "I", "AGTCCT": "J", "GCATGA": "K", "CAGACT": "L",
"TTCCAG": "M", "GGCAAT": "N", "TCGAGA": "O", "CTAAGG": "P",
"AGGCTA": "Q", "TCACTG": "R", "TTGCTC": "S", "AGCTTC": "T"}
codons_3 = {"TCCGAT": "A", "TGCACA": "B", "GAGTCT": "C", "CTGAAG": "D",
"TCGACT": "E", "CGTCAT": "F", "AGGTTG": "G", "TACGGA": "H",
"GTAAGC": "I", "CGTAGA": "J", "TGACAC": "K", "GTAGTG": "L",
"GTTTCAG": "M", "GACTAG": "N", "AAACCG": "O", "AATGGG": "P",
"AGAGAG": "Q", "CGGTAA": "R", "ACAGCA": "S", "ACAAGG": "T"}
```

```

# list of all codons, making a Counter object with all codons value 1 to compare enrichments
allcodons = []
for SKey in scaffolds.iterkeys():
    for key1 in codons_1.iterkeys():
        for key2 in codons_2.iterkeys():
            for key3 in codons_3.iterkeys():
                allcodons.append(codons_1[key1] + codons_2[key2] + codons_3[key3] + scaffolds[SKey])
allCodonCount = collections.Counter()
for codon in allcodons:
    allCodonCount[codon]+=1
writer = csv.writer(open('allcodons.csv', 'wb')) # adapted from
http://stackoverflow.com/questions/8685809/python-writing-a-dictionary-to-a-csv-file-with-one-line-for-every-key-
value
for barcode, count in allCodonCount.iteritems():
    writer.writerow([barcode, count])

#open the file of the selection to be analyzed. extract out the sequences.
allFiles = glob.glob('*.*fastq') # makes a list of all the fastq files in that directory
#print allFiles
# https://docs.python.org/2/library/csv.html#module-csv
#with open(filepath + 'barcode keys.csv', 'rU') as csvfile: # rU prevents the universal newline error
http://stackoverflow.com/questions/6726953/open-the-file-in-universal-newline-mode-using-csv-module-django
# keyDict = {}
# keys = csv.reader(csvfile, delimiter = ',')
# for row in keys:
# keyDict[row[0]] = row[1] # makes a dictionary for the offsets

summarycsv = csv.writer(open('sequencing summary.csv', 'wb')) # adapted from
http://stackoverflow.com/questions/8685809/python-writing-a-dictionary-to-a-csv-file-with-one-line-for-every-key-
value
summarycsv.writerow(['Selection', 'Total Reads', 'Valid Reads'])

for filename in allFiles:
    file = filepath + filename
    fasta = open(file) # opens the fasta file
    fastaList = fasta.readlines() # converts the file to a list http://stackoverflow.com/questions/328059/create-
a-list-that-contain-each-line-of-a-file
    seqList = fastaList[1::4] # gets every 4th line, the sequences

    """CHANGE THIS IF FILENAME FORMAT HAS CHANGED"""
    findIndices = re.search('(?!<=_.)*(?!=_L)', filename) # for MiSeq: get the selection indices, which are the first
strings between the underscores. adapted from http://stackoverflow.com/questions/15033905/regex-that-extracts-
text-between-tags-but-not-the-tags
    # findIndices = re.search('(?!<=_.)*(?!=_R1.fastq)', filename) # for NextSeq: get the selection indices, which are the
first strings between the underscores. adapted from http://stackoverflow.com/questions/15033905/regex-that-
extracts-text-between-tags-but-not-the-tags
    indices = findIndices.group(0) # yields S# (whatever the sequencing index is) from the filename

    validseqs = [] # list of valid sequences
    offset = ""
    # offset = keyDict[indices] # is there an offset in the first 0-5 bases?
    for seq in seqList:
        if offset == seq[0:len(offset)]: # if the first bases match the offset
            matchedSeq = re.search('GAGTGGGATG....TAG.....ATCAT.....AACTT.....GTGTACAGGG', seq) #changed to
be 4Ns for scaffold
            # regex that finds the library sequence within the sequences nucleotides
            if matchedSeq is not None: # if a matching sequence is found, add it
                template = matchedSeq.group(0) # this should only find one result in matchedSeq.group, hence the 0
index

```

```

#match sequences to codons
if template[10:14] in scaffolds.keys():    #check if all 4 codons are valid
    if template[17:23] in codons_1.keys():
        if template[28:34] in codons_2.keys():
            if template[39:45] in codons_3.keys():
                scaff = scaffolds[template[10:14]] #all 4 are valid, so start mapping
                A = codons_1[template[17:23]]
                B = codons_2[template[28:34]]
                C = codons_3[template[39:45]]
                decoded = A + B + C + scaff
                validseqs.append(decoded + '\n') #add this sequence to the list

"""**CHANGE THIS IF FILENAME FORMAT HAS CHANGED**"""
findProtein = re.search('.*(?!=_S)', filename) #find the protein name, similar logic as for the indices. same for
MiSeq and NextSeq
protein = findProtein.group(0)

#extractedFileName = indices + '_' + protein + '_decoded.txt'
#testSeqsExtracted = open(extractedFileName, 'w') #make a new file to write extracted sequences to
(https://docs.python.org/2/tutorial/inputoutput.html)
#testSeqsExtracted.writelines(validseqs)
print 'Selection ' + indices + ' (' + protein + ') has ' + str(len(validseqs)) + ' valid sequences out of ' +
str(len(seqList)) + ' reads.'
summarycsv.writerow([protein, str(len(seqList)), str(len(validseqs))])

#now looking through these decoded sequence files and counting them
seqCounts = collections.Counter()
for seq in validseqs:
    seqCounts[seq.rstrip()] +=1 #rstrip() to get rid of the newline \n to make keys match
#print 'done with counter'
totCount = seqCounts + allCodonCount #add one to each so that we have all codons represented, and don't
divide by 0.
for count in totCount.iteritems():
    #print type(count[1])
    #print len(validseqs)
    totCount[count[0]] = float(count[1])/float(len(validseqs)) #normalize to that selection

#print len(seqCounts.keys())
#print len(allCodonCount.keys())
#print len(totCount.keys())
counterFileName = indices + '_' + protein + '_seqCounts.csv'
#export to csv
writer = csv.writer(open(counterFileName, 'wb')) # adapted from
http://stackoverflow.com/questions/8685809/python-writing-a-dictionary-to-a-csv-file-with-one-line-for-every-key-value
# writer.writerow(['Sequence', 'Scaffold', 'A Codon', 'B Codon', 'C Codon', 'Raw Count']) #header row
for barcode, count in totCount.iteritems():
# writer.writerow([barcode, barcode[0:2], barcode[2:5], barcode[5:8], barcode[8:11], count]) #barcodes, split by
individual codon, and total count
    writer.writerow([barcode, count, seqCounts[barcode]])
#print 'done writing lines'

#dictionaries of REV codons
# scaffolds = {"4A":'TCCA', "4B":'GTTG', "4C":'TTAA', "4D":'TTGT', "4E":'CTCA',
# "4F":'GGAA', "4G":'TATA', "4H":'ATTT', "4I":'GTAG', "4J":'TAGA',
# "4K":'GTTT', "4L":'TTTT', "4M":'TTTG', "4N":'AGGT', "4O":'AGGA',
# "4P":'GTAA', "4Q":'ATTA', "4R":'GTTA', "4S":'GATT', "4T":'ATAG',

```

```

# "4U":'ATCA', "4V":'AAAA', "4W":'AAAG', "4X":'AATT', "4Y":'GATA',
# "4Z":'GGTT',"4UU":'GTGA',"4VV":'TGTG',"4WW":'AATG',"4XX":'AAGT',
# "4YY":'AATA',"4ZZ":'AAGA'}
# codons_1 = {"1A":'GGCTTT', "1B":'AGGCTT', "1C":'GCCAAA', "1D":'AGGAAC',
# "1E":'CGTATG', "1F":'CATGAG', "1G":'GAGACA', "1H":'CTGTAG',
# "1I":'TAGCTG', "1J":'TCTCAG', "1K":'AGAGCT', "1L":'CGAACA',
# "1M":'GCTCTT', "1N":'TCTGCT', "1O":'TCGATC', "1P":'GACTGA',
# "1Q":'GCAGTA', "1R":'GCGTAT', "1S":'GGAATC', "1T":'GCTTCA'}
# codons_2 = {"2A": 'GCTGAA', "2B": 'GTCGAT', "2C": 'GATTGC', "2D": 'GGACTT',
# "2E": 'ACGGAT', "2F": 'TCGAGT', "2G": 'GCAAGA', "2H": 'CTTGTG',
# "2I": 'GGCTAA', "2J": 'AGGACT', "2K": 'TCATGC', "2L": 'AGTCTG',
# "2M": 'CTGGAA', "2N": 'ATTGCC', "2O": 'TCTCGA', "2P": 'CCTTAG',
# "2Q": 'TAGCCT', "2R": 'CAGTGA', "2S": 'GAGCAA', "2T": 'GAAGCT'}
# codons_3 = {"3A": 'ATCGGA', "3B": 'TGTGCA', "3C": 'AGACTC', "3D": 'CTTCAG',
# "3E": 'AGTCGA', "3F": 'ATGACG', "3G": 'CAACCT', "3H": 'TCCGTA',
# "3I": 'GCTTAC', "3J": 'TCTACG', "3K": 'GTGTCA', "3L": 'CACTAC',
# "3M": 'CTGAAC', "3N": 'CTAGTC', "3O": 'CGGTTT', "3P": 'CCCATT',
# "3Q": 'CTCTCT', "3R": 'TTACCG', "3S": 'TGCTGT', "3T": 'CCTTGT'}

```

### *Calculating enrichment values of library members*

this code will calculate enrichments. Put all of the \*seqCounts.csv files from the other code into a new folder.

Set the input lib and file path

updated 10/24/2016 for ULib notation (ABCXX)

updated regenerated library input 11/8/2017

"""

```

import glob
import csv
import os
import re

```

#first, find the sequence files

filepath = '----' #insert filepath for selection sequencing reads (from sequencing script)

os.chdir(filepath) # sets the directory to look in

inputLibFile = '---' #set the filepath for the input library

with open(filepath + inputLibFile,'rU') as csvfile:

```
inputDict = {}
```

```
keys = csv.reader(csvfile, delimiter = ',')
```

```
for row in keys:
```

```
inputDict[row[0]] = [row[1],row[2]] # makes a dictionary for the input enrichments
```

"""change input text string if not input"""

```
allFiles = [i for i in glob.glob("*.csv") if 'seqCounts' in i and 'reg_lib' not in i]
```

# makes a list of all the seq Counts files in that directory except for the input lib

#print allFiles

for file in allFiles:

```
with open(filepath + file,'rU') as csvfile:
```

```
selectDict = {}
```

```
keys = csv.reader(csvfile, delimiter = ',')
```

```
for row in keys:
```

```
selectDict[row[0]] = [row[1],row[2]] # makes a dictionary for the {barcode: selection enrichments, seq counts}
```

```
enrichCalc = {}
```

```
for key in selectDict.keys():
```



```

    enrichCalc[key] = float(selectDict[key][0])/float(inputDict[key][0])
# print file
# findIndices = re.search('.*?(?=_)',file) # get the selection indices. .*? is non-greedy
# indices = findIndices.group(0) # yields A-1, or whatever the sequencing index is, from the filename

findProtein = re.search('(?!<=[0-9]_).*?(?=_seqCounts)', file) #find the protein name, similar logic as for the indices
protein = findProtein.group(0)

counterFileName = protein + '_enrichment_vs_input.csv'
writer = csv.writer(open(counterFileName, 'wb')) # adapted from
http://stackoverflow.com/questions/8685809/python-writing-a-dictionary-to-a-csv-file-with-one-line-for-every-key-value
writer.writerow(['Sequence', 'A Codon', 'B Codon', 'C Codon', 'Scaffold', 'Raw Selection Freq', 'Raw Selection
Count', 'Pre-enrich Freq', 'Pre-enrich Count', 'Enrichment']) #header row
for barcode, enrich in enrichCalc.iteritems():
    writer.writerow([barcode, barcode[0], barcode[1], barcode[2], barcode[3:],
        selectDict[barcode][0], selectDict[barcode][1], inputDict[barcode][0], inputDict[barcode][1], enrich]) #barcodes,
split by individual codon, and total count

```



For both *cis* and *trans* isomer, final macrocyclization was afforded by treating resin with pentafluorophenyl diphenylphosphinate (5 eq), anhydrous DIPEA (10 eq) dissolved in ~10 mL anhydrous DMF for 3-16 hours. Resin was then washed three times with DMF, three times with CH<sub>2</sub>Cl<sub>2</sub> and allowed to dry in the fume hood. Macrocycle product was then cleaved off resin with two treatments of ~15 mL solution containing 95% trifluoroacetic acid (TFA), 2.5% triisopropylsilane (TIPS) and 2.5% water. Macrocycles sensitive to hydrosilane reduction were cleaved without TIPS. Resin was then washed two times with TFA. Combined supernatants were then dried to an oily residue through rotary evaporation. The peptide was precipitated out of solution with Et<sub>2</sub>O cooled to -78°C. Ether was then decanted and isolated precipitate was dissolved in a minimal amount of 3:1 DMF/water, and filtered through 0.22 μL Ultrafree-MC Centrifugal Filters (Millipore Sigma). For hydrophobic macrocycles, no ether precipitation was conducted and sample was directly dissolved in 3:1 DMF/water. Sample was then purified by reverse phase HPLC, with a gradient of 10-60% acetonitrile/water containing 0.1% TFA over 40 minutes. Fractions that contained product was then freeze dried to produce a white powder. Yields for reported macrocycles varied from 1-10% of the initial resin loading.

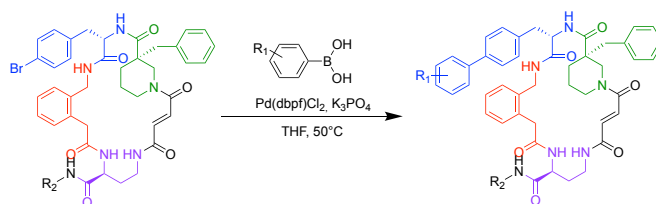

**Generalized procedure A for Suzuki-Miyaura cross-coupling of macrocycles:** Adapting conditions described previously<sup>2</sup>, into a 10 mL screw-top vial, bromo-macrocycle (0.011 mmol, 1.0 eq), boronic acid (0.11 mmol, 10 eq), [1,1'-Bis(di-*tert*-butylphosphino)ferrocene]dichloropalladium (II) (0.0002 mmol, 0.2 eq), and potassium phosphate tribasic (0.23 mmol, 20 eq) was combined and sealed with a septum. Flask was evacuated and refilled with N<sub>2</sub> three times and left under N<sub>2</sub>. Degassed THF (0.05 M), by cycling between vacuum and N<sub>2</sub> with concurrent sonication, was then added to the sealed flask and allowed to stir at 50° C for 16 hours. After cooling, the reaction was cooled and solvent was removed under high-vac. Solid residue was dissolved in a minimal amount of 3:1 DMF/water with 5% TFA and filtered through 0.22 μL Ultrafree®-MC Centrifugal Filters (Millipore-Sigma). Sample was then purified by reverse HPLC, with a 10-60% or 10-100% gradient of acetonitrile/water containing 0.1%TFA depending on hydrophobicity of compound. Fractions that contained product was then freeze dried to produce a white powder.

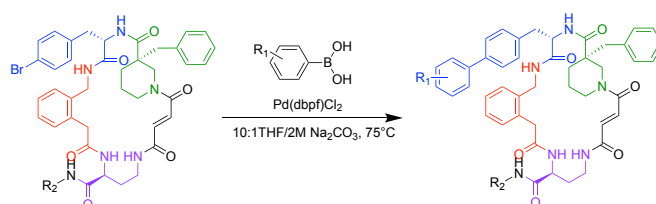

**Generalized procedure B for Suzuki-Miyaura cross-coupling of macrocycles:** Into a 10 mL screw-top vial, bromo-macrocycle (0.011 mmol, 1.0 eq), boronic acid (0.11 mmol, 10 eq), [1,1'-Bis(di-*tert*-butylphosphino)ferrocene]dichloropalladium (II) (0.0002 mmol, 0.2 eq), were combined and sealed with a septum. Flask was evacuated and refilled with N<sub>2</sub> three times and left under N<sub>2</sub>. Degassed 10:1 THF/2M Na<sub>2</sub>CO<sub>3</sub> (0.05 M) was added and reaction as heated to at 75° C for 16 hours. After cooling, the reaction was cooled and solvent was removed under high-vac. Solid residue was dissolved in a minimal amount of 3:1 DMF/water with 5% TFA and filtered through 0.22 μL Ultrafree®-MC Centrifugal Filters (Millipore-Sigma). Sample was then purified by reverse HPLC, with a 10-60% or 10-100% gradient of acetonitrile/water containing 0.1%TFA depending on hydrophobicity of compound. Fractions that contained product was then freeze dried to produce a white powder.

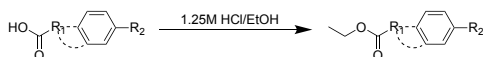

**General conditions for ethyl ester protection of carboxylic acids:** In a 50 mL roundbottom flask, ester (1 mmol, 1 eq) was suspended in 1.25M HCl/EtOH at RT for 16 hours. Reaction was then diluted slowly with 100 mL saturated NaHCO<sub>3</sub>, and aqueous layer was extracted three times with EtOAc. Combined organic layers were washed with saturated NaCl, dried over Na<sub>2</sub>SO<sub>4</sub>, and concentrated by rotary evaporation to afford ester product.

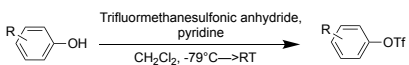

**Generalized conditions for triflation of phenols:** Into a N<sub>2</sub> flushed 100 mL roundbottom flask, phenol derivative (1.0 mmol, 1.0 eq), was dissolved in CH<sub>2</sub>Cl<sub>2</sub> and cooled to -78°C in a dry ice/acetone bath. After sequential dropwise addition of pyridine (3.0 mmol, 3.0 eq) and trifluoromethanesulfonic anhydride (1.1 mmol, 1.1 eq), reaction was allowed to stir for 16 hours, warming up to RT. Reaction was then diluted with 100 mL saturated NaHCO<sub>3</sub>, and aqueous layer was extracted three times with EtOAc. Combined organic layers were washed with saturated NaCl, dried over Na<sub>2</sub>SO<sub>4</sub>, and concentrated by rotary evaporation to afford triflate product.

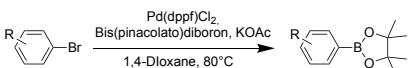

**Generalized Miyaura borylation conditions:** Into a 100 mL roundbottom flask, aryl bromide (1.0 mmol, 1.0 eq), bis(pinacolato)diboron (2.0 mmol, 2. eq), [1,1'-bis(diphenylphosphino)ferrocene]dichloropalladium (II) (0.1 mmol, 0.1 eq), and potassium acetate (3.0 mmol, 3 eq) was combined and sealed with a septum. Flask was evacuated and refilled with N<sub>2</sub> three times and left under N<sub>2</sub>. Degassed 1,4-Dioxane (0.1 M), by cycling between vacuum and N<sub>2</sub> with concurrent sonication, was then added to the sealed flask and allowed to stir at 80° C for 16 hours. After cooling, the reaction was cooled and diluted with 1M HCl and transferred to a separatory funnel. Aqueous layer was extracted three times with EtOAc and combined organic layers were washed with saturated NaCl, dried over Na<sub>2</sub>SO<sub>4</sub>, and concentrated by rotary evaporation. Residue was purified by column chromatography to afford product.

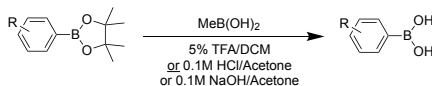

**General pinacol deprotection conditions:** Adapting conditions described previously<sup>3</sup>, In a 50 mL roundbottom flask, pinacol boronic ester (1 mmol, 1 eq) and methylboronic acid (10 mmol, 10 eq) were suspended in 5% TFA/CH<sub>2</sub>Cl<sub>2</sub>, 0.1M HCl/Acetone, or 0.1M NaOH/Acetone depending on acid sensitivity of substrate and allowed to stir at RT for 16 hours. Solvent was removed by rotary evaporation and the residue was resuspended in 0.1M HCl. HCl was removed by rotary evaporation, removing excess methylboronic acid and methylboronic acid pinacol ester. This cycle was repeated three times until no methylboronic acid was present by NMR analysis. For acid sensitive substrates, residue was resuspended in water during rotary evaporation steps. For substrates dissolved in 0.1M NaOH/Acetone, solution was neutralized to ~pH 3, filtered, and concentrated by rotary evaporation. Excess MeB(OH)<sub>2</sub> was removed as described above using water.

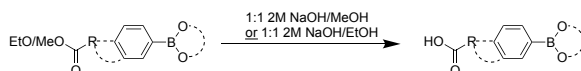

**General conditions for saponification of methyl/ethyl esters:** In a 50 mL roundbottom flask, ester (1 mmol, 1 eq) was suspended in 1:1 2M NaOH/MeOH (0.1M) for methyl esters or 1:1 2M NaOH/EtOH (0.1M) for ethyl esters and stirred at RT for 15 hours. Reaction was neutralized by diluting reaction with 50 mL 1M HCl, and aqueous layer was extracted three times with EtOAc. Combined organic layers were washed with saturated NaCl, dried over Na<sub>2</sub>SO<sub>4</sub>, and concentrated by rotary evaporation to isolated carboxylic acid.

## Synthesis of intermediates

<sup>1</sup>H-NMR spectra are provided in a separate part of the Supplementary Information. HRMS characterization for intermediates are shown in Supplementary Table 7.

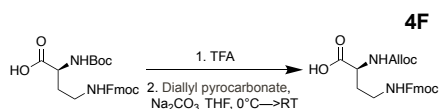

**4F (128):** In a 500 mL roundbottom flask, *N*<sup>t</sup>-Boc-*N'*-Fmoc-L-2,4-diaminobutyric acid (10 mmol) was dissolved in 20 mL TFA and stirred at RT for 1 hour. TFA was then removed by rotary evaporation, leaving an oily solution. Oil was dissolved in 1:1 tetrahydrofuran (THF)/water (0.05 M), sodium carbonate (30 mmol, 3 eq) was added to the flask, and cooled to 0°C. Diallyl pyrocarbonate (15 mmol, 1.5 eq) was then added dropwise to the flask and the reaction was capped and allowed to stir for 5 hours, warming up to RT. THF was removed by rotary evaporation and the aqueous layer was transferred to a separatory funnel and washed two times with 100 mL Et<sub>2</sub>O. Aqueous layer was then acidified to pH 1 with 12N HCl, resulting in white precipitate. Aqueous layer was then extracted three times with 100 mL of ethyl acetate (EtOAc). Combined organic layers were washed with saturated NaCl, dried over Na<sub>2</sub>SO<sub>4</sub>, and concentrated by rotary evaporation to afford **4F** a yellow foam. Yield: 82%

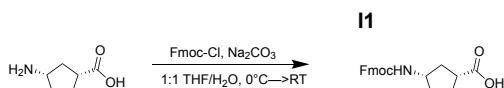

**I1 (129):** In a 250 mL roundbottom flask, (-)-(1*S*,4*R*)-4-Aminocyclopent-2-enecarboxylic acid (8 mmol), 9-Fluorenylmethoxycarbonyl chloride (8.8 mmol, 1.1 eq), and sodium carbonate (40 mmol, 6 eq) were dissolved in 1:1 THF/water (0.1 M) and stirred at RT for 16 hour. THF was removed by rotary evaporation and ether was added to the aqueous suspension. Aqueous layer was washed two times with ether, then acidified to pH2 with 12N HCl. Aqueous layer was then extracted three times with 100 mL of ethyl acetate (EtOAc). Combined organic layers were washed with saturated NaCl, dried over Na<sub>2</sub>SO<sub>4</sub>, and concentrated by rotary evaporation to afford **I1** as a white solid. Yield: 96%

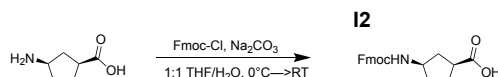

**I2 (130):** Compound was synthesized as described for compound **I1**. Synthesis afforded **I2** as a white solid. Yield: 89%

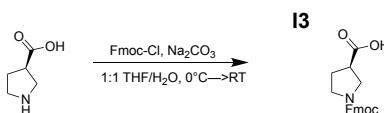

**I3 (131):** In a 250 mL roundbottom flask, (R)-(-)-Pyrrolidine-3-carboxylic acid (2 mmol), 9-Fluorenylmethoxycarbonyl chloride (2.2 mmol, 1.1 eq), and sodium carbonate (12 mmol, 6 eq) were dissolved in 1:1 THF/water (0.1 M) and stirred at RT for 16 hour. THF was removed by rotary evaporation and ether was added to the aqueous suspension. Aqueous layer was washed two times with ether, then acidified to pH2 with 12N HCl. Aqueous layer was then extracted three times with 100 mL of ethyl acetate (EtOAc). Combined organic layers were washed with saturated NaCl, dried over Na<sub>2</sub>SO<sub>4</sub>, and concentrated by rotary evaporation to afford **I3** as a white solid. Yield: 78%

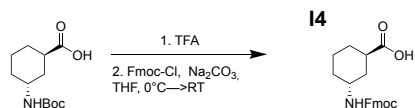

**I4 (132):** In a 250 mL roundbottom flask, (1*R*,3*R*)-3-[[*tert*-Butoxy]carbonyl]amino)cyclohexane-1-carboxylic acid (1 mmol) was dissolved in 20 mL TFA and stirred at RT for 1 hour. TFA was then removed by rotary evaporation, leaving an oily solution. Residue was dissolved in 1:1 THF/water (0.1M) at 0°C, followed by addition of 9-Fluorenylmethoxycarbonyl chloride (1.1 mmol, 1.1 eq), and sodium carbonate (6 mmol, 6 eq). The reaction was stirred 16 hours, warming to RT. THF was removed by rotary evaporation and ether was added to the aqueous suspension. Aqueous layer was washed two times with ether, then acidified to pH2 with 12N HCl. Aqueous layer was then extracted three times with 100 mL of ethyl acetate (EtOAc). Combined organic layers were washed with saturated NaCl, dried over Na<sub>2</sub>SO<sub>4</sub>, and concentrated by rotary evaporation to afford **I4** as a yellow solid with some impurities. Compound was carried onto next step without further purification. Yield: 45%

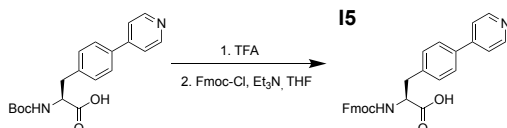

**I5 (133):** In a 250 mL roundbottom flask, *N*-Boc-4-(4-pyridinyl)-*L*-phenylalanine (0.4 mmol) was dissolved in 20 mL TFA and stirred at RT for 1 hour. TFA was then removed by rotary evaporation, leaving an oily solution. Residue was suspended in THF (0.1M), and water was added until all material dissolved. 9-Fluorenylmethoxycarbonyl chloride (0.44 mmol, 1.1 eq) dissolved in THF was then added, followed by triethylamine (2.0 mmol, 5 eq) and the reaction was stirred 16 hour at RT. THF was removed by rotary evaporation and reaction as partitioned between

EtOAc and 1M HCl. Aqueous layer was then extracted three times with 100 mL of ethyl acetate (EtOAc). Combined organic layers were washed with saturated NaCl, dried over Na<sub>2</sub>SO<sub>4</sub>, and concentrated by rotary evaporation. Crude product was purified by column chromatography (0-20% MeOH/CH<sub>2</sub>Cl<sub>2</sub>) to afford **I5** as a white solid. Yield: 88%

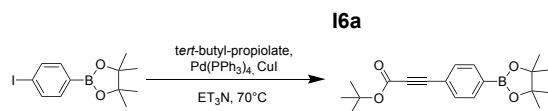

**I6a (134)**: Adapting a previously reported protocol<sup>4</sup>, in a N<sub>2</sub> flushed 100mL roundbottom flask, a solution of 4-iodophenylboronic acid pinacol ester, was dissolved in degassed triethylamine. Then, Tetrakis(triphenylphosphine)-palladium(0), Copper(I) iodide and *tert*-butyl propiolate were added successively and the reaction was heated at 70°C overnight. Reaction was then concentrated by rotary evaporation and crude material was directly purified by column chromatography (0-50% EtOAc/Hex). Product **I6a** was isolated as a yellow solid. Yield: 28%

**I6b**

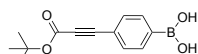

**I6b (135)**: Compound was synthesized using **general pinacol deprotection conditions** with **I6a** as starting material, substituting 0.1N HCl/Acetone as solvent. Solvent was removed by rotary evaporation and the residue was resuspended in H<sub>2</sub>O and once again removed by rotary evaporation to remove excess MeB(OH)<sub>2</sub>. This step was repeated until all MeB(OH)<sub>2</sub> was removed as seen on <sup>1</sup>H NMR. Product **I6b** was isolated as a white solid with some minor impurities. Product was carried onto next step without further purification. Yield: quantitative

**I7a**

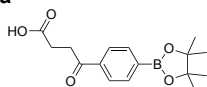

**I7a (136)**: Compound was synthesized using **generalized Miyaura borylation conditions** with 3-(4-Bromobenzoyl)propionic acid. Column chromatography conditions: 0-20% MeOH/CH<sub>2</sub>Cl<sub>2</sub>. Product **I7a** was isolated as a yellow solid with some excess bis(pinacolato)diboron and extra impurities. Product was carried onto next step without further purification. Yield: approx. quantitative.

**I7b**

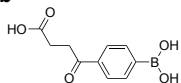

**I7b (137)**: Compound was synthesized using **general pinacol deprotection conditions** with **I7a** and 5% TFA/CH<sub>2</sub>Cl<sub>2</sub> as solvent. Product **I7b** was isolated as a yellow solid with some minor impurities. Product was carried onto next step without further purification. Yield: 88%

**I8a**

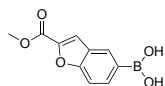

**I8a (138)**: Compound was synthesized using **general pinacol deprotection conditions** with Methyl 5-(tetramethyl-1,3,2-dioxaborolan-2-yl)-1-benzofuran-2-carboxylate and 5% TFA/CH<sub>2</sub>Cl<sub>2</sub> as solvent. Product **I8a** was isolated as a white solid. Yield: 98%

**I8b**

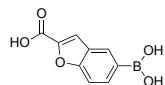

**I8b (139)**: Compound was synthesized using **general conditions for saponification of methyl/ethyl esters** with **I8a**, using 1:1 2M NaOH/MeOH as solvent. Product **I8b** was isolated as white solid with some small impurities. Product was carried onto next step without further purification. Yield: quantitative

**I9a**

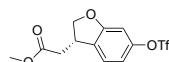

**I9a (140)**: Compound was synthesized using **generalized conditions for triflation of phenols** with (S)-Methyl 2-(6-hydroxy-2,3-dihydrobenzofuran-3-yl)acetate. Product **I9a** was isolated as a brown oil. Yield: 78%

**I9b**

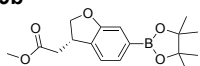

**I9b (141):** Compound was synthesized using **generalized Miyaura borylation conditions** with **I9a** and no acidic workup. Crude reaction was directly purified by column chromatography (0-50%EtOAc/Hex) to afford product **I9b** as white powder with small amounts of bis(pinacolato)diboron. Product was carried onto next step without further purification. Yield: 67%

**I9c**

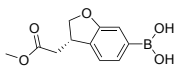

**I9c (142):** Compound was synthesized using **general pinacol deprotection conditions** with **I9b** and 5% TFA/CH<sub>2</sub>Cl<sub>2</sub> as solvent. Product **I9c** was isolated as a white solid. Yield: 90%

**I9d**

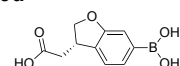

**I9d (143):** Compound was synthesized using **general conditions for saponification of methyl/ethyl esters** with **I9c**, using 1:1 2M NaOH/MeOH as solvent. Product **I9d** was isolated as white solid with small impurities. Product was carried onto next step without further purification. Yield: 90%

**I10**

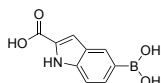

**I10 (144):** Compound was synthesized using **general pinacol deprotection conditions** with 5-(Tetramethyl-1,3,2-dioxaborolan-2-yl)-1H-indole-2-carboxylic acid and 5% TFA/CH<sub>2</sub>Cl<sub>2</sub> as solvent. Product **I10** was isolated as a white solid. Yield: quantitative

**I11**

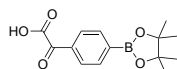

**I11 (145):** Compound was synthesized using **general conditions for saponification of methyl/ethyl esters** with methyl 2-oxo-2-[4-(tetramethyl-1,3,2-dioxaborolan-2-yl)phenyl]acetate, using 1:1 2M NaOH/MeOH as solvent. Product **I11** was isolated as white solid with small impurities. Product was carried onto next step without further purification. Yield: quantitative

**I12a**

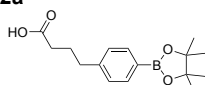

**I12a (146):** Compound was synthesized using **generalized Miyaura borylation conditions** with 4-(4-Bromophenyl)butanoic acid. Column chromatography conditions: 0-20% MeOH/CH<sub>2</sub>Cl<sub>2</sub>. Product **I12a** was isolated as a yellow solid with some excess bis(pinacolato)diboron and extra impurities. Product was carried onto next step without further purification Yield: approx. 37%

**I12b**

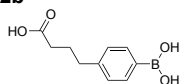

**I12b (147):** Compound was synthesized using **general pinacol deprotection conditions** with **I12a** and 5% TFA/CH<sub>2</sub>Cl<sub>2</sub> as solvent. Product **I12b** was isolated as a yellow solid. Yield: quantitative

**I13a**

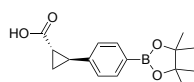

**I13a (148):** Compound was synthesized using **generalized Miyaura borylation conditions** with (1S,2S)-2-(4-Bromophenyl)cyclopropanecarboxylic acid. Column chromatography conditions: 0-20% MeOH/CH<sub>2</sub>Cl<sub>2</sub>. Product **I13a** was isolated as a yellow solid with some excess bis(pinacolato)diboron and small impurities. Product was carried onto next step without further purification Yield: approx. quantitative

**I13b**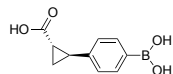

**I13b (149):** Compound was synthesized using **general pinacol deprotection conditions** with **I13a** and 5% TFA/CH<sub>2</sub>Cl<sub>2</sub> as solvent. Product **I13b** was isolated as a yellow solid with minor impurities and trace amounts of **I13a**. Product was carried on without further purification. Yield: 86%

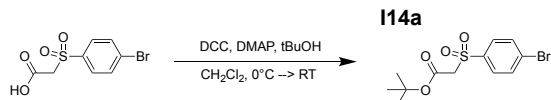

**I14a (150):** Adapting from a previously reported protocol<sup>5</sup>, into a 50mL roundbottom flask, 2-(4-bromophenyl)acetic acid (0.7 mmol, 1 eq), 4-Dimethylaminopyridine (0.11 mmol, 0.16eq), and *tert*-butanol (2.8 mmol, 4 eq) were dissolved in CH<sub>2</sub>Cl<sub>2</sub> (0.1 M) and cooled in an ice bath. N, N'-Dicyclohexylcarbodiimide dissolved in 2 mL CH<sub>2</sub>Cl<sub>2</sub> was then added and stirred for 15 minutes, observing a white precipitate. Reaction was then warmed to RT and allowed to stir for 16 hours. Precipitate was filtered through celite and reaction concentrated by rotary evaporation. Residue was dissolved in 100mL EtOAc and 100 mL saturated NaHCO<sub>3</sub>. Organic layer was isolated and aqueous layer was extracted two more times with 100 mL EtOAc. Combined organic layers were washed with saturated NaCl, dried over Na<sub>2</sub>SO<sub>4</sub>, and concentrated by rotary evaporation. Product **I14a** was isolated as a white solid. Yield: 85%

**I14b**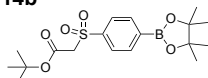

**I14b (151):** Compound was synthesized using **generalized Miyaura borylation conditions** with **I14a** and no acidic workup. Crude reaction was directly purified by column chromatography (0-50%EtOAc/Hex) to afford product **I14b** as white powder with trace amounts of bis(pinacolato)diboron. Product was carried onto next step without further purification. Yield: 88%.

**I14c**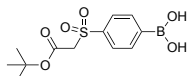

**I14c (152):** Compound was synthesized using **general pinacol deprotection conditions** with **I14b** and 0.1M NaOH/Acetone as solvent. Product **I14c** was isolated as a white solid with methylboronic acid and other impurities identified on H-NMR. Purification by column chromatography was attempted on crude **I14c** product, but full oxidation of the boronic acid to a phenol was observed. Therefore, crude **I14c** product was carried onto further reactions without further purification. Yield: approx. quantitative

**I15a**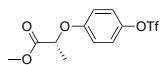

**I15a (153):** Compound was synthesized using **generalized conditions for triflation of phenols** with Methyl (r)-(+)-2-(4-hydroxyphenoxy)propanoate. Product **I15a** was isolated as a yellow oil. Yield: quantitative

**I15b**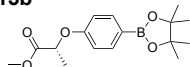

**I15b (154):** Compound was synthesized using **generalized Miyaura borylation conditions** with **I15a** and no acidic workup. Crude reaction was directly purified by column chromatography (0-50%EtOAc/Hex) to afford product **I15b** as white powder with trace amounts of bis(pinacolato)diboron. Product was carried onto next step without further purification. Yield: 67%

**I15c**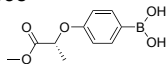

**I15c (155):** Compound was synthesized using **general pinacol deprotection conditions** with **I15b** and 5% TFA/CH<sub>2</sub>Cl<sub>2</sub> as solvent. Product **I15c** was isolated as a white solid with trace amounts of **I15b** excess MeB(OH)<sub>2</sub>. Product was carried onto next step without further purification. Yield: quantitative



**I15d**

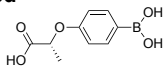

**I15d (156):** Compound was synthesized using **general conditions for saponification of methyl/ethyl esters** with **I15c**, using 1:1 2M NaOH/MeOH as solvent. Product **I15d** was isolated as brown solid with trace amounts of saponified **I15b**. Product was carried on without further purification. Yield: 61%

**I16a**

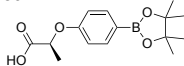

**I16a (157):** Compound was synthesized using **generalized Miyaura borylation conditions** with (2S)-2-(4-bromophenoxy)propanoic acid. Column chromatography conditions: 0-20% MeOH/CH<sub>2</sub>Cl<sub>2</sub>. Product **I16a** was isolated as a yellow solid with some excess bis(pinacolato)diboron and extra impurities. Product was carried onto next step without further purification Yield: approx. 89%

**I16b**

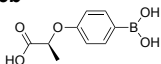

**I16b (158):** Compound was synthesized using **general pinacol deprotection conditions** with **I16a** and 5% TFA/CH<sub>2</sub>Cl<sub>2</sub> as solvent. Product **I16b** was isolated as a white solid with some impurities and excess MeB(OH)<sub>2</sub>. Product was carried on without further purification. Yield: quantitative

**I17a**

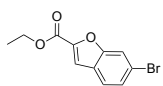

**I17a (159):** Compound was synthesized using **general conditions for ethyl ester protection of carboxylic acids** using 6-Bromobenzofuran-2-carboxylic acid. Product **I17a** was isolated as a white solid with a small amount of starting material impurities. Product was carried onto next step without further purification. Yield: quantitative

**I17b**

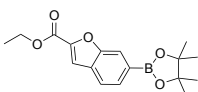

**I17b (160):** Compound was synthesized using **generalized Miyaura borylation conditions** with **I17a** and no acidic workup. Crude reaction was directly purified by column chromatography (0-50%EtOAc/Hex) to afford product **I17b** as clear solid with small amounts of bis(pinacolato)diboron. Product was carried onto next step without further purification Yield: 88%

**I17c**

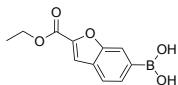

**I17c (161):** Compound was synthesized using **general pinacol deprotection conditions** with **I17b** and 5% TFA/CH<sub>2</sub>Cl<sub>2</sub> as solvent. Product **I17c** was isolated as a white solid. Yield: 83%

**I17d**

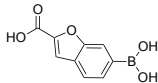

**I17d (162):** Compound was synthesized using **general conditions for saponification of methyl/ethyl esters** with **I17c**, using 1:1 2M NaOH/EtOH as solvent. Product **I17d** was isolated as brown solid. Yield: quantitative

**I18a**

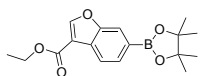

**I18a (163):** Compound was synthesized using **generalized Miyaura borylation conditions** with Ethyl 6-bromobenzofuran-3-carboxylate and no acidic workup. Crude reaction was directly purified by column chromatography (0-50%EtOAc/Hex) to afford product **I18a** as white solid with trace amounts of bis(pinacolato)diboron. Product was carried onto next step without further purification Yield: 94%

**I18b**

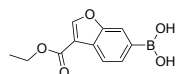

**I18b (164):** Compound was synthesized using **general pinacol deprotection conditions** with **I18a** and 5% TFA/CH<sub>2</sub>Cl<sub>2</sub> as solvent. Product **I18b** was isolated as a white solid. Yield: quantitative

**I18c**

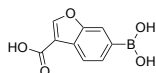

**I18c (165):** Compound was synthesized using **general conditions for saponification of methyl/ethyl esters** with **I18b**, using 1:1 2M NaOH/EtOH as solvent. Product **I18c** was isolated as white solid. Yield: 98%

**I19a**

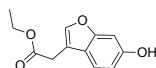

**I19a (166):** Compound was synthesized using **general conditions for ethyl ester protection of carboxylic acids** using 2-(6-Hydroxybenzofuran-3-yl)acetic acid. Product **I19a** was isolated as a brown oil. Yield: 86%

**I19b**

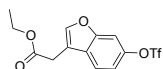

**I19b (167):** Compound was synthesized using **generalized conditions for triflation of phenols** with **I19a**. Product **I19b** was isolated as a brown oil. Yield: quantitative

**I19c**

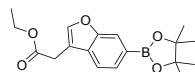

**I19c (168):** Compound was synthesized using **generalized Miyaura borylation conditions** with **I19b** and no acidic workup. Crude reaction was directly purified by column chromatography (0-50%EtOAc/Hex) to afford product **I19c** as white solid with trace amounts of bis(pinacolato)diboron. Product was carried onto next step without further purification Yield: 76%

**I19d**

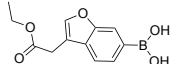

**I19d (169):** Compound was synthesized using **general pinacol deprotection conditions** with **I19c** and 5% TFA/CH<sub>2</sub>Cl<sub>2</sub> as solvent. Product **I19d** was isolated as a white solid. Yield: 82%

**I19e**

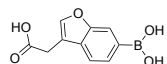

**I19e (170):** Compound was synthesized using **general conditions for saponification of methyl/ethyl esters** with **I19d**, using 1:1 2M NaOH/EtOH as solvent. Product **I19e** was isolated as white solid. Yield: 96%

**I20a**

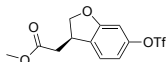

**I20a (171):** Compound was synthesized using **generalized conditions for triflation of phenols** with (R)-Methyl 2-(6-hydroxy-2,3-dihydrobenzofuran-3-yl)acetate. Product **I20a** was isolated as a clear oil. Yield: quantitative

**I20b**

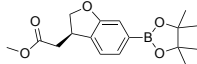

**I20b (172):** Compound was synthesized using **generalized Miyaura borylation conditions** with **I20a** and no acidic workup. Crude reaction was directly purified by column chromatography (0-50%EtOAc/Hex) to afford product **I20b**

as white powder with small amounts of bis(pinacolato)diboron. Product was carried onto next step without further purification Yield: 81%

#### I20c

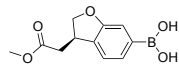

**I20c (173):** Compound was synthesized using **general pinacol deprotection conditions** with **I20b** and 5% TFA/CH<sub>2</sub>Cl<sub>2</sub> as solvent. Product **I20c** was isolated as a white solid. Yield: quantitative

#### I20d

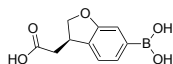

**I20d (174):** Compound was synthesized using **general conditions for saponification of methyl/ethyl esters** with **I20c**, using 1:1 2M NaOH/MeOH as solvent. Product **I20d** was isolated as white solid with minor impurities. Product was carried on without further purification. Yield: 42%

#### I21a

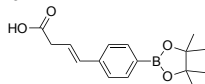

**I21a (175):** Compound was synthesized using **generalized Miyaura borylation conditions** with (3E)-4-(4-bromophenyl)but-3-enoic acid. Column chromatography conditions: 0-20% MeOH/CH<sub>2</sub>Cl<sub>2</sub>. Product **I21a** was isolated as a yellow solid with some excess bis(pinacolato)diboron and extra impurities. Product was carried onto next step without further purification Yield: approx. 93%

#### I21b

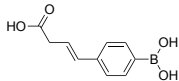

**I21b (176):** Compound was synthesized using **general pinacol deprotection conditions** with **I21a** and 5% TFA/CH<sub>2</sub>Cl<sub>2</sub> as solvent. Product **I21b** was isolated as a yellow solid. Yield: 86%

#### I22a

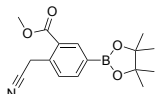

**I22a (177):** Compound was synthesized using **generalized Miyaura borylation conditions** with Methyl 5-bromo-2-(cyanomethyl)benzoate and no acidic workup. Crude reaction was directly purified by column chromatography (0-50% EtOAc/Hex) to afford product **I22a** as white powder with trace amounts of bis(pinacolato)diboron. Product was carried onto next step without further purification Yield: 97%

#### I22b

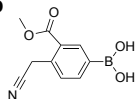

**I22b (178):** Compound was synthesized using **general pinacol deprotection conditions** with **I22a** and 5% TFA/CH<sub>2</sub>Cl<sub>2</sub> as solvent. Product **I22b** was isolated as a white solid. Yield: quantitative 80%

#### I22c

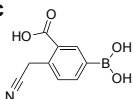

**I22c (179):** Compound was synthesized using **general conditions for saponification of methyl/ethyl esters** with **I22b**, using 1:1 2M NaOH/MeOH as solvent. Product **I20d** was isolated as white solid with some minor impurities. Product was carried on without further purification. Yield: quantitative

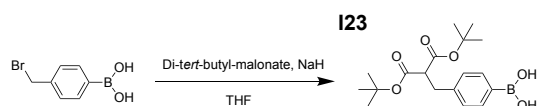

**I23 (180):** Adapting a previously reported protocol<sup>6</sup>, Into a N<sub>2</sub> flushed 50 mL roundbottom flask, sodium hydride (60% dispersion in mineral oil) (1.47 mmol, 1.05 eq) was dissolved in anhydrous THF (0.1 M) followed by dropwise addition of di-*tert*-butyl-malonate. Once gas finished forming from the solution, 4-(Bromomethyl)phenylboronic acid dissolved in 1mL THF was added to the flask, which was allowed to stir at room temperature for 16 hours. The reaction was then diluted with saturated NH<sub>4</sub>Cl and extracted three times with EtOAc. Combined organic layers were washed with saturated NaCl, dried over Na<sub>2</sub>SO<sub>4</sub>, and concentrated by rotary evaporation. Residue was purified by silica gel chromatography (0-10% MeOH/CH<sub>2</sub>Cl<sub>2</sub>) to afford product as white solid. Yield: 84%

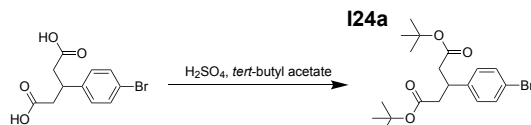

**I24a (181):** Adopting a previously reported protocol<sup>7</sup>, into a N<sub>2</sub> flushed 50 mL roundbottom flask, B-(4-Bromophenyl)glutaric acid (0.7 mmol, 1.0 eq) was suspended in *tert*-butyl-acetate (0.2M), followed by addition of concentrated H<sub>2</sub>SO<sub>4</sub> (0.7 mmol, 1 eq). Reaction was allowed to stir at room temperature for 16 hours. Reaction was diluted with sat. bicarbonate and extracted three times with EtOAc. Combined organic layers were washed with saturated NaCl, dried over Na<sub>2</sub>SO<sub>4</sub>, and concentrated by rotary evaporation. Residue was purified by column chromatography (0-50% EtOAc/Hex) to afford product as white solid. Yield: 47%

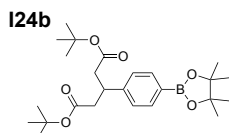

**I24b (182):** Compound was synthesized using **generalized Miyaura borylation conditions procedure** with **I24a** and no acidic workup. Crude reaction was directly purified by column chromatography (0-50%EtOAc/Hex) to afford product as white powder with trace amounts of bis(pinacolato)diboron. Yield: 97%

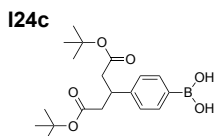

**I24c (183):** Compound was synthesized **using general pinacol deprotection conditions** with **I24b** and substituting 0.1N NaOH/Acetone as solvent. After 16 hours, reaction was neutralized to ~pH 2-3 with 1N HCl and filtered to remove salts. Solvent was removed by rotary evaporation and the residue was resuspended in H<sub>2</sub>O and once again removed by rotary evaporation to remove excess MeB(OH)<sub>2</sub>. This step was repeated until all MeB(OH)<sub>2</sub> was removed as seen on <sup>1</sup>H NMR. Product was isolated as a white solid with small impurities. Product was carried on to next step without further purification Yield: quantitative

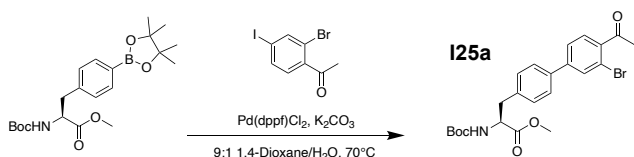

**I25a (184):** Adapting a previously reported protocol<sup>8</sup>, a mixture of Boc-4-borono pinacol ester-L phenylalanine methyl ester (1.98 mmol, 1 eq.), 1-(2-Bromo-4-iodophenyl)ethanone (2.56 mmol, 1.3 eq.), [1,1-Bis(diphenylphosphino)ferrocene]dichloropalladium(II) (0.19 mmol, 0.1 eq.), and potassium carbonate (7.90 mmol, 4 eq.) was dissolved in 18 mL of degassed 1,4-dioxane and 2 mL of degassed water (0.1 M) and stirred at 70°C in a sealed round bottom flask overnight. The reaction was then cooled down to room temperature, diluted with water, extracted three times with ethyl acetate (EtOAc), washed with brine, dried over sodium sulfate (Na<sub>2</sub>SO<sub>4</sub>), and evaporated under reduced pressure. The crude product was then dry loaded onto a 25G SNAP column, purified by flash column chromatography using 0-50% EtOAc/Hexanes, and yielded **I25a** as a yellow foam. Yield: 42% yield

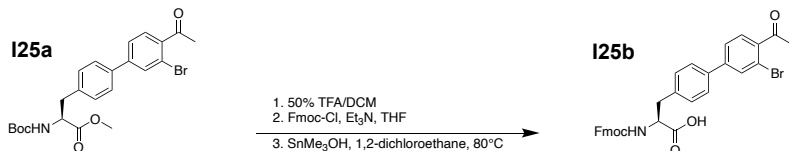

**I25b (185):** Compound **I25a** (0.84 mmol, 1 eq.) was dissolved in 4.5 mL trifluoroacetic acid and 4.5 mL dichloromethane (0.1 M solution) to remove the Boc protecting group. The reaction was stirred for one hour at room temperature and the solvent was evaporated under reduced pressure and dried on high vacuum overnight. Then, a mixture of the crude Boc deprotected product and sodium bicarbonate (4.21 mmol, 5 eq.) was dissolved in 2 mL of 1,4-dioxane and 4 mL of water and stirred. 9-Fluorenylmethoxycarbonyl chloride (1.05 mmol, 1.25 eq.) was separately dissolved in 2 mL of 1,4-dioxane and added to the reaction. The reaction was stirred overnight at room temperature, then suspended in water, extracted three times with EtOAc, dried over Na<sub>2</sub>SO<sub>4</sub>, and evaporated under reduced pressure. To deprotect the methyl ester, a mixture of the crude Fmoc protected product and trimethyltin hydroxide (1.26 mmol, 1.5 eq.) was dissolved in 8 mL of 1,2-dichloroethane (0.1 M) and stirred at 80°C under reflux for three hours. The reaction was then cooled down to room temperature, suspended in ethyl acetate, washed two times with 1 M hydrochloric acid, and dried over Na<sub>2</sub>SO<sub>4</sub>. The crude product was then dry loaded onto a 10G SNAP column, purified by flash column chromatography using 0-100% EtOAc/Hexanes, and yielded **I25b** as a yellow solid. Yield: 76%

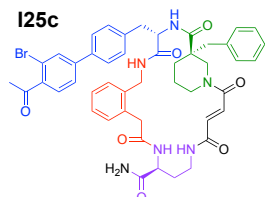

**I25c (186):** Macrocyclic peptide was synthesized using **general procedure for solid-phase peptide synthesis of macrocyclic inhibitors**. **I25c** was obtained as a white powder. Yield: 7%

Resin: Rink Amide

4<sup>th</sup> Building Block: N<sup>α</sup>-Fmoc-N<sup>γ</sup>-allyloxycarbonyl-L-2,4-diaminobutyric acid

1<sup>st</sup> Building Block: Fmoc-2-aminomethyl-phenylacetic acid

2<sup>nd</sup> Building Block: **I25b**

3<sup>rd</sup> Building Block: (S)-Fmoc-3-benzyl-piperidine-3-carboxylic acid

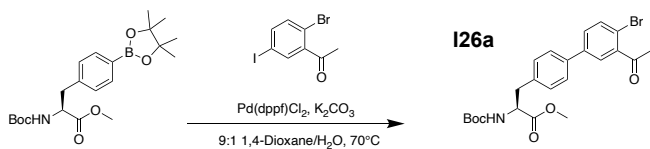

**I26a (187):** Compound was synthesized and purified as described in **I25a** with 1-(2-Bromo-5-iodophenyl)ethanone, affording **I26a** as a yellow foam. Yield: 37% yield

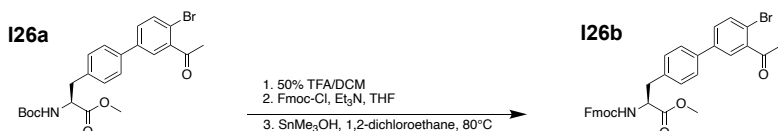

**I26b (188):** Compound was synthesized and purified as described in **I25b**, with **I26a** (0.73 mmol, 1 eq.), affording **I26b** as a yellow solid. Yield: 55%

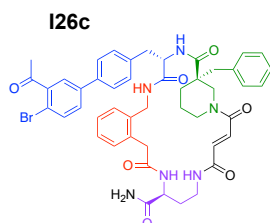

**I26c (189):** Macrocyclic peptide was assembled using **general procedure for solid-phase peptide synthesis of macrocyclic inhibitors** and was obtained as a white powder. Yield: 7%

Resin: Rink Amide

4<sup>th</sup> Building Block: N<sup>α</sup>-Fmoc-N<sup>γ</sup>-allyloxycarbonyl-L-2,4-diaminobutyric acid

1<sup>st</sup> Building Block: Fmoc-2-aminomethyl-phenylacetic acid

2<sup>nd</sup> Building Block: **I26b**

3<sup>rd</sup> Building Block: (S)-Fmoc-3-benzyl-piperidine-3-carboxylic acid

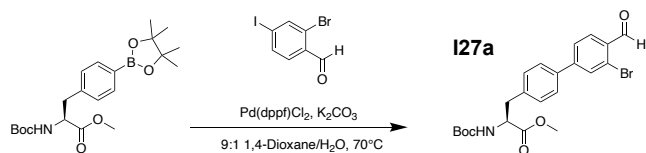

**I27a (190)**: Compound was synthesized and purified as described in **I25a** with 2-Bromo-4-iodobenzaldehyde, affording **I27a** as a yellow foam. Yield: 46%

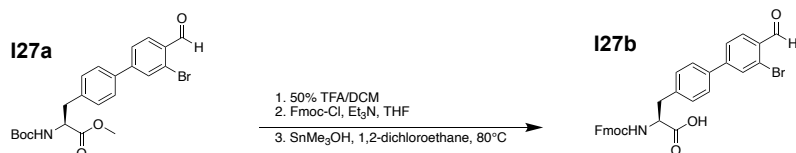

**I27b (191)**: Compound was synthesized and purified as described in **I25b**, with **I27a** (0.91 mmol, 1 eq.), affording **I27b** as a yellow solid. Yield: 63%

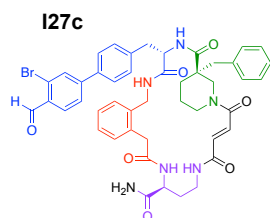

**I27c (192)**: Macrocycle was assembled using **general procedure for solid-phase peptide synthesis of macrocycle inhibitors** and was obtained as a white powder. Yield: 1%

Resin: Rink Amide

4<sup>th</sup> Building Block: N<sup>α</sup>-Fmoc-N<sup>γ</sup>-allyloxycarbonyl-L-2,4-diaminobutyric acid

1<sup>st</sup> Building Block: Fmoc-2-aminomethyl-phenylacetic acid

2<sup>nd</sup> Building Block: **I27b**

3<sup>rd</sup> Building Block: (S)-Fmoc-3-benzyl-piperidine-3-carboxylic acid

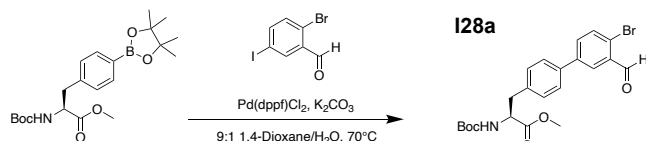

**I28a (193)**: Compound was synthesized and purified as described in **I25a** with 2-Bromo-5-iodobenzaldehyde, affording **I28a** as a yellow foam. Yield: 42%

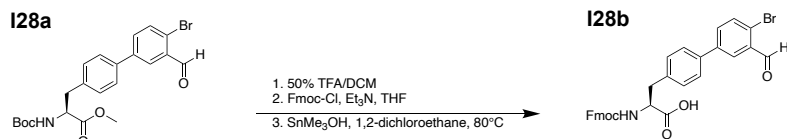

**I28b (194)**: Compound was synthesized and purified as described in **I25b**, with **I28a** (0.87 mmol, 1eq.), affording **I28b** as a yellow solid. Yield: 36%

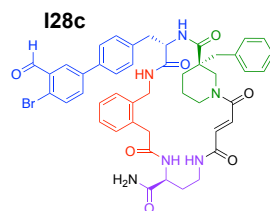

**I28c (195)**: Macrocycle was assembled using **general procedure for solid-phase peptide synthesis of macrocycles inhibitors** and was obtained as a white powder. Yield: 1%

Resin: Rink Amide

4<sup>th</sup> Building Block: N<sup>α</sup>-Fmoc-N<sup>γ</sup>-allyloxycarbonyl-L-2,4-diaminobutyric acid

1<sup>st</sup> Building Block: Fmoc-2-aminomethyl-phenylacetic acid

2<sup>nd</sup> Building Block: **I28b**

3<sup>rd</sup> Building Block: (S)-Fmoc-3-benzyl-piperidine-3-carboxylic acid

**I29a**

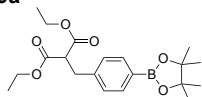

**I29a (196)**: Compound was synthesized using **generalized Miyaura borylation conditions** with Diethyl 2-(4-bromobenzyl)malonate and no acidic workup. Crude reaction was directly purified by column chromatography (0-50%EtOAc/Hex) to afford product as white powder with small amounts of bis(pinacolato)diboron. Yield: approx quantitative

**I29b**

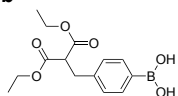

**I29b (197)**: Compound was synthesized using **general pinacol deprotection conditions** with **I29a** and 5% TFA/CH<sub>2</sub>Cl<sub>2</sub> as solvent. Product **I29b** was isolated as a white solid. Yield: quantitative

**I30a**

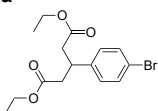

**I30a (198)**: Compound was synthesized using **general conditions for ethyl ester protection of carboxylic acids** using B-(4-bromophenyl)glutaric acid. Product **I30a** was isolated as a brown oil. Yield: 86%

**I30b**

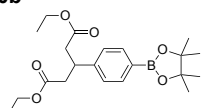

**I30b (199)**: Compound was synthesized using **generalized Miyaura borylation conditions** with **I30a** and no acidic workup. Crude reaction was directly purified by column chromatography (0-50%EtOAc/Hex) to afford product as white powder with trace amounts of bis(pinacolato)diboron. Yield: 88%

**I30c**

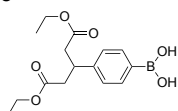

**I30c (200)**: Compound was synthesized using **general pinacol deprotection conditions** with **I30b** and 5% TFA/CH<sub>2</sub>Cl<sub>2</sub> as solvent. Product **I30c** was isolated as a white solid. Yield: quantitative

**(4Br)B6**

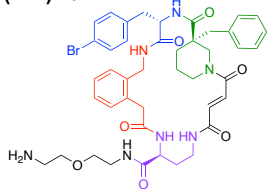

**(4Br)B6 (201)**: Macrocycle was assembled using **general procedure for solid-phase peptide synthesis of macrocycle inhibitors**.

Resin: Bis-(2-aminoethyl)-ether trityl

4<sup>th</sup> Building Block: N<sup>α</sup>-Fmoc-N<sup>γ</sup>-allyloxycarbonyl-L-2,4-diaminobutyric acid

1<sup>st</sup> Building Block: Fmoc-2-aminomethyl-phenylacetic acid

2<sup>nd</sup> Building Block: Fmoc-4-bromo-L-phenylalanine

3<sup>rd</sup> Building Block: (S)-Fmoc-3-benzyl-piperidine-3-carboxylic acid

**(4Br)B6-A**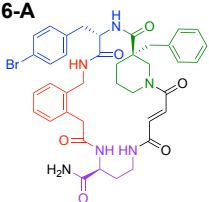

**(4Br)B6-A (202):** Macrocyclic was assembled using **general procedure for solid-phase peptide synthesis of macrocyclic inhibitors.**

Resin: NovaPEG Rink Amide

4<sup>th</sup> Building Block: N<sup>α</sup>-Fmoc-N<sup>γ</sup>-allyloxycarbonyl-L-2,4-diaminobutyric acid

1<sup>st</sup> Building Block: Fmoc-2-aminomethyl-phenylacetic acid

2<sup>nd</sup> Building Block: Fmoc-4-bromo-L-phenylalanine

3<sup>rd</sup> Building Block: (S)-Fmoc-3-benzyl-piperidine-3-carboxylic acid

**(4Br)B6-B**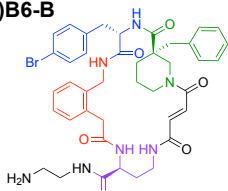

**(4Br)B6-B (203):** Macrocyclic was assembled using **general procedure for solid-phase peptide synthesis of macrocyclic inhibitors.**

Resin: Universal NovaTag

4<sup>th</sup> Building Block: N<sup>α</sup>-Fmoc-N<sup>γ</sup>-allyloxycarbonyl-L-2,4-diaminobutyric acid

1<sup>st</sup> Building Block: Fmoc-2-aminomethyl-phenylacetic acid

2<sup>nd</sup> Building Block: Fmoc-4-bromo-L-phenylalanine

3<sup>rd</sup> Building Block: (S)-Fmoc-3-benzyl-piperidine-3-carboxylic acid

**(4Br)B6-FI**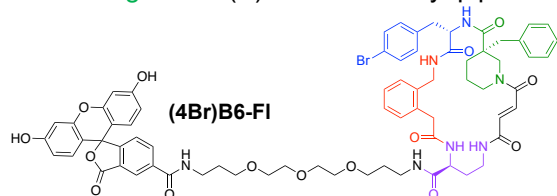

**(4Br)B6-FI (204):** Macrocyclic was assembled using **general procedure for solid-phase peptide synthesis of macrocyclic inhibitors.** Prior to acidic cleavage, resin was suspended with three 1-hour treatments of 1M

hydroxybenzotriazole monohydrate dissolved in 1:1 CH<sub>2</sub>Cl<sub>2</sub>/trifluoroethanol to remove Mmt group. 5-carboxyfluorescein (5 eq) and (HATU, 4.75 equiv.) were dissolved in a separate flask in ~10-15 mL DMF then treated with *N,N*'-diisopropylethylamine (DIPEA, 10 eq) for 5 minutes, observing a color change. This flask was then transferred to resin swollen in ~10 mL DMF and allowed to mix for 24 hours. Fluorescein labeled peptide were then cleaved from resin and purified as described in general procedure.

Resin: Universal PEG NovaTag™\_Resin

4<sup>th</sup> Building Block: N<sup>α</sup>-Fmoc-N<sup>γ</sup>-allyloxycarbonyl-L-2,4-diaminobutyric acid

1<sup>st</sup> Building Block: Fmoc-2-aminomethyl-phenylacetic acid

2<sup>nd</sup> Building Block: Fmoc-4-bromo-L-phenylalanine

3<sup>rd</sup> Building Block: (S)-Fmoc-3-benzyl-piperidine-3-carboxylic acid

**\* (4Br)B6-A**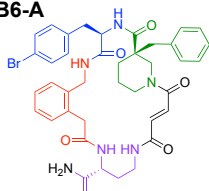

**\* (4Br)B6-A (205):** Macrocyclic was assembled using **general procedure for solid-phase peptide synthesis of macrocyclic inhibitors.**

Resin: NovaPEG Rink Amide

4<sup>th</sup> Building Block: N<sup>α</sup>-Fmoc-N<sup>γ</sup>-allyloxycarbonyl-D-2,4-diaminobutyric acid



- 1<sup>st</sup> Building Block: Fmoc-2-aminomethyl-phenylacetic acid  
 2<sup>nd</sup> Building Block: Fmoc-4-bromo-L-phenylalanine  
 3<sup>rd</sup> Building Block: (R)-Fmoc-3-benzyl-piperidine-3-carboxylic acid

**\*(4Br)B6-B**

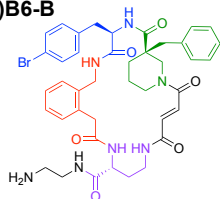

**\*(4Br)B6-B (206):** Macrocyclic was assembled using **general procedure for solid-phase peptide synthesis of macrocycle inhibitors.**

Resin: Universal NovaTag

4<sup>th</sup> Building Block: N<sup>α</sup>-Fmoc-N<sup>γ</sup>-allyloxycarbonyl-D-2,4-diaminobutyric acid

1<sup>st</sup> Building Block: Fmoc-2-aminomethyl-phenylacetic acid

2<sup>nd</sup> Building Block: Fmoc-4-bromo-L-phenylalanine

3<sup>rd</sup> Building Block: (R)-Fmoc-3-benzyl-piperidine-3-carboxylic acid

### Synthesis of final macrocycles

<sup>1</sup>H-NMR spectra are provided in a separate part of the Supplementary Information. HRMS characterization for intermediates are shown in Supplementary Table 8.

**JOMBt**

**JOMBc**

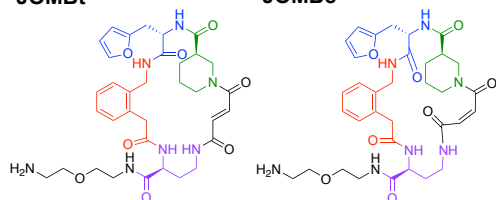

**JOMBt/c:** Macrocyclic was assembled using **general procedure for solid-phase peptide synthesis of macrocycle inhibitors.**

Resin: Bis-(2-aminoethyl)-ether trityl

4<sup>th</sup> Building Block: N<sup>α</sup>-Fmoc-N<sup>γ</sup>-allyloxycarbonyl-L-2,4-diaminobutyric acid

1<sup>st</sup> Building Block: Fmoc-2-aminomethyl-phenylacetic acid

2<sup>nd</sup> Building Block: Fmoc-β-(2-furyl)-Ala-OH

3<sup>rd</sup> Building Block: Fmoc-D-nipecotic acid

**JOMBt-A**

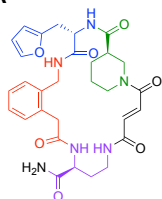

**JOMBt-A:** Macrocyclic was assembled using **general procedure for solid-phase peptide synthesis of macrocycle inhibitors.**

Resin: NovaPEG Rink Amide

4<sup>th</sup> Building Block: N<sup>α</sup>-Fmoc-N<sup>γ</sup>-allyloxycarbonyl-L-2,4-diaminobutyric acid

1<sup>st</sup> Building Block: Fmoc-2-aminomethyl-phenylacetic acid

2<sup>nd</sup> Building Block: Fmoc-β-(2-furyl)-Ala-OH

3<sup>rd</sup> Building Block: Fmoc-D-nipecotic acid

**JOMBt-D**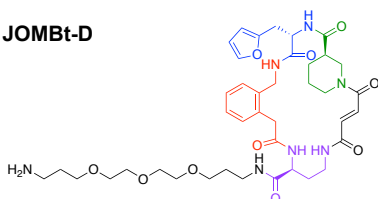

**JOMBt-D:** Macrocycle was assembled using **general procedure for solid-phase peptide synthesis of macrocycle inhibitors**.

Resin: Universal PEG NovaTag™\_Resin

4<sup>th</sup> Building Block: N<sup>α</sup>-Fmoc-N<sup>γ</sup>-allyloxycarbonyl-L-2,4-diaminobutyric acid

1<sup>st</sup> Building Block: Fmoc-2-aminomethyl-phenylacetic acid

2<sup>nd</sup> Building Block: Fmoc-β-(2-furyl)-Ala-OH

3<sup>rd</sup> Building Block: Fmoc-D-nipecotic acid

**JOBBt**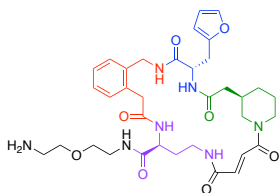

**JOBBt:** Macrocycle was assembled using **general procedure for solid-phase peptide synthesis of macrocycle inhibitors**.

Resin: Bis-(2-aminoethyl)-ether trityl

4<sup>th</sup> Building Block: N<sup>α</sup>-Fmoc-N<sup>γ</sup>-allyloxycarbonyl-L-2,4-diaminobutyric acid

1<sup>st</sup> Building Block: Fmoc-2-aminomethyl-phenylacetic acid

2<sup>nd</sup> Building Block: Fmoc-β-(2-furyl)-Ala-OH

3<sup>rd</sup> Building Block: (R)-(1-Fmoc-piperidin-3-yl)acetic acid

**JOBBc-A**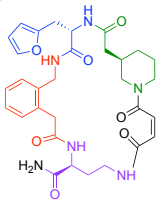

**JOBBc-A:** Macrocycle was assembled using **general procedure for solid-phase peptide synthesis of macrocycle inhibitors**.

Resin: NovaPEG Rink Amide

4<sup>th</sup> Building Block: N<sup>α</sup>-Fmoc-N<sup>γ</sup>-allyloxycarbonyl-L-2,4-diaminobutyric acid

1<sup>st</sup> Building Block: Fmoc-2-aminomethyl-phenylacetic acid

2<sup>nd</sup> Building Block: Fmoc-β-(2-furyl)-Ala-OH

3<sup>rd</sup> Building Block: (R)-(1-Fmoc-piperidin-3-yl)acetic acid

**JOCBt****JOCBc**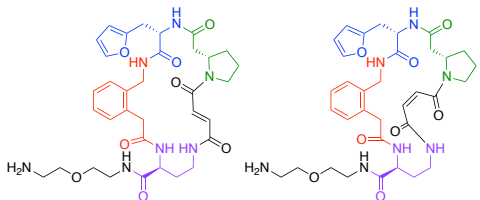

**JOCBt/c:** Macrocycle was assembled using **general procedure for solid-phase peptide synthesis of macrocycle inhibitors**.

Resin: Bis-(2-aminoethyl)-ether trityl

4<sup>th</sup> Building Block: N<sup>α</sup>-Fmoc-N<sup>γ</sup>-allyloxycarbonyl-L-2,4-diaminobutyric acid

1<sup>st</sup> Building Block: Fmoc-2-aminomethyl-phenylacetic acid

2<sup>nd</sup> Building Block: Fmoc-β-(2-furyl)-Ala-OH

3<sup>rd</sup> Building Block: Fmoc-L-β-HomoPro-OH

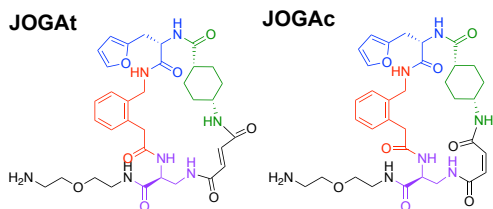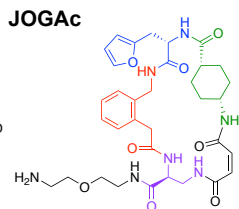

**JOGAt/c:** Macrocycle was assembled using **general procedure for solid-phase peptide synthesis of macrocycle inhibitors.**

Resin: Bis-(2-aminoethyl)-ether trityl

4<sup>th</sup> Building Block: N<sup>α</sup>-Fmoc-N<sup>β</sup>-allyloxycarbonyl-L-2,3-diamino-propionic acid

1<sup>st</sup> Building Block: Fmoc-2-aminomethyl-phenylacetic acid

2<sup>nd</sup> Building Block: Fmoc-β-(2-furyl)-Ala-OH

3<sup>rd</sup> Building Block: Fmoc-cis-4-aminocyclohexane carboxylic acid

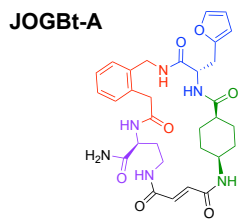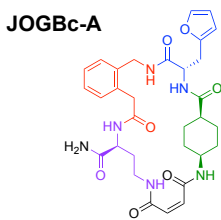

**JOGBt/c-A:** Macrocycle was assembled using **general procedure for solid-phase peptide synthesis of macrocycle inhibitors.**

Resin: NovaPEG Rink Amide

4<sup>th</sup> Building Block: N<sup>α</sup>-Fmoc-N<sup>γ</sup>-allyloxycarbonyl-L-2,4-diaminobutyric acid

1<sup>st</sup> Building Block: Fmoc-2-aminomethyl-phenylacetic acid

2<sup>nd</sup> Building Block: Fmoc-β-(2-furyl)-Ala-OH

3<sup>rd</sup> Building Block: Fmoc-cis-4-aminocyclohexane carboxylic acid

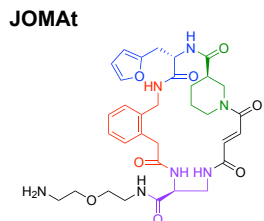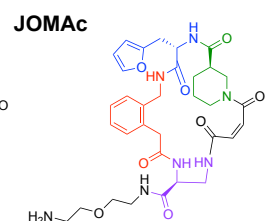

**JOMAt/c:** Macrocycle was assembled using **general procedure for solid-phase peptide synthesis of macrocycle inhibitors.**

Resin: Bis-(2-aminoethyl)-ether trityl

4<sup>th</sup> Building Block: N<sup>α</sup>-Fmoc-N<sup>β</sup>-allyloxycarbonyl-L-2,3-diamino-propionic acid

1<sup>st</sup> Building Block: Fmoc-2-aminomethyl-phenylacetic acid

2<sup>nd</sup> Building Block: Fmoc-β-(2-furyl)-Ala-OH

3<sup>rd</sup> Building Block: Fmoc-D-nipecotic acid

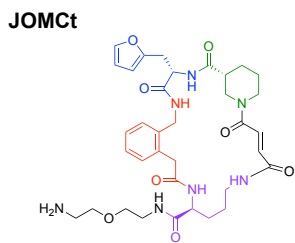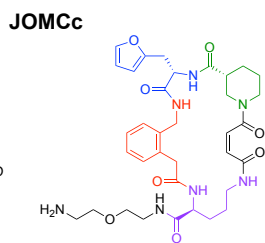

**JOMCt/c:** Macrocycle was assembled using **general procedure for solid-phase peptide synthesis of macrocycle inhibitors.**

Resin: Bis-(2-aminoethyl)-ether trityl

4<sup>th</sup> Building Block: N<sup>α</sup>-Fmoc-N<sup>δ</sup>-allyloxycarbonyl-L-ornithine

**1<sup>st</sup> Building Block:** Fmoc-2-aminomethyl-phenylacetic acid

**2<sup>nd</sup> Building Block:** Fmoc- $\beta$ -(2-furyl)-Ala-OH

**3<sup>rd</sup> Building Block:** Fmoc-D-nipecotic acid

**JOMFt**

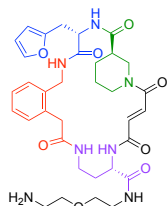

**JOMFc**

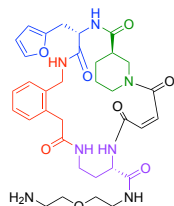

**JOMFt/c:** Macrocycle was assembled using **general procedure for solid-phase peptide synthesis of macrocycle inhibitors.**

Resin: Bis-(2-aminoethyl)-ether trityl

**4<sup>th</sup> Building Block:** 4F (N $^{\alpha}$ -allyloxycarbonyl-N $^{\beta}$ -Fmoc-L-2,4-diamino-butyric acid)

**1<sup>st</sup> Building Block:** Fmoc-2-aminomethyl-phenylacetic acid

**2<sup>nd</sup> Building Block:** Fmoc- $\beta$ -(2-furyl)-Ala-OH

**3<sup>rd</sup> Building Block:** Fmoc-D-nipecotic acid

**HOJt**

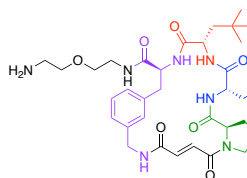

**HOJc**

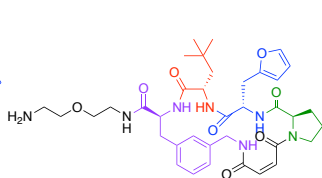

**HOJt/c:** Macrocycle was assembled using **general procedure for solid-phase peptide synthesis of macrocycle inhibitors.**

Resin: Bis-(2-aminoethyl)-ether trityl

**4<sup>th</sup> Building Block:** 4J (Fmoc-3-(allyloxycarbonyl-aminomethyl)-L-phenylalanine)

**1<sup>st</sup> Building Block:** Fmoc-neopentylglycine

**2<sup>nd</sup> Building Block:** Fmoc- $\beta$ -(2-furyl)-Ala-OH

**3<sup>rd</sup> Building Block:** Fmoc-D-Proline

**HJt**

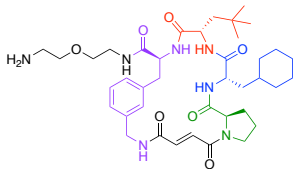

**HJc**

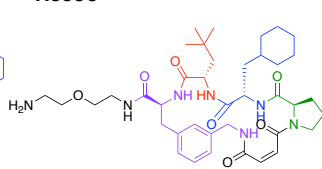

**HJt/c:** Macrocycle was assembled using **general procedure for solid-phase peptide synthesis of macrocycle inhibitors.**

Resin: Bis-(2-aminoethyl)-ether trityl

**4<sup>th</sup> Building Block:** 4J (Fmoc-3-(allyloxycarbonyl-aminomethyl)-L-phenylalanine)

**1<sup>st</sup> Building Block:** Fmoc-neopentylglycine

**2<sup>nd</sup> Building Block:** Fmoc- $\beta$ -cyclohexyl-L-alanine

**3<sup>rd</sup> Building Block:** Fmoc-D-Proline

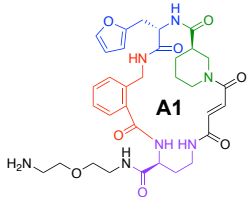

**A1:** Macrocycle was assembled using **general procedure for solid-phase peptide synthesis of macrocycle inhibitors.**

Resin: Bis-(2-aminoethyl)-ether trityl

**4<sup>th</sup> Building Block:** N $^{\alpha}$ -Fmoc-N $^{\gamma}$ -allyloxycarbonyl-L-2,4-diaminobutyric acid

**1<sup>st</sup> Building Block:** 2-(Fmoc-aminomethyl)benzoic acid

2<sup>nd</sup> Building Block: Fmoc- $\beta$ -(2-furyl)-Ala-OH

3<sup>rd</sup> Building Block: Fmoc-D-nipecotic acid

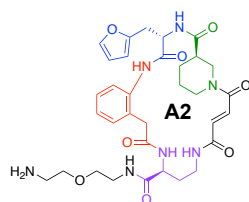

**A2:** Macrocycle was assembled using **general procedure for solid-phase peptide synthesis of macrocycle inhibitors**.

Resin: Bis-(2-aminoethyl)-ether trityl

4<sup>th</sup> Building Block: N <sup>$\alpha$</sup> -Fmoc-N <sup>$\gamma$</sup> -allyloxycarbonyl-L-2,4-diaminobutyric acid

1<sup>st</sup> Building Block: Fmoc-(2-aminophenyl)acetic acid

2<sup>nd</sup> Building Block: Fmoc- $\beta$ -(2-furyl)-Ala-OH

3<sup>rd</sup> Building Block: Fmoc-D-nipecotic acid

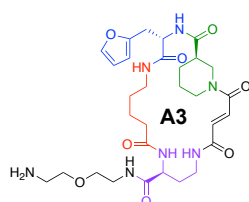

**A3:** Macrocycle was assembled using **general procedure for solid-phase peptide synthesis of macrocycle inhibitors**.

Resin: Bis-(2-aminoethyl)-ether trityl

4<sup>th</sup> Building Block: N <sup>$\alpha$</sup> -Fmoc-N <sup>$\gamma$</sup> -allyloxycarbonyl-L-2,4-diaminobutyric acid

1<sup>st</sup> Building Block: Fmoc-5-aminovaleric acid

2<sup>nd</sup> Building Block: Fmoc- $\beta$ -(2-furyl)-Ala-OH

3<sup>rd</sup> Building Block: Fmoc-D-nipecotic acid

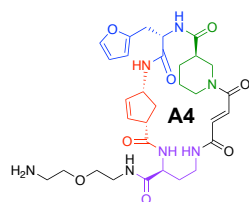

**A4:** Macrocycle was assembled using **general procedure for solid-phase peptide synthesis of macrocycle inhibitors**.

Resin: Bis-(2-aminoethyl)-ether trityl

4<sup>th</sup> Building Block: N <sup>$\alpha$</sup> -Fmoc-N <sup>$\gamma$</sup> -allyloxycarbonyl-L-2,4-diaminobutyric acid

1<sup>st</sup> Building Block: (Fmoc-(-)-(1*S*,4*R*)-4-Aminocyclopent-2-enecarboxylic acid) (AAP\_02\_046) I1

2<sup>nd</sup> Building Block: Fmoc- $\beta$ -(2-furyl)-Ala-OH

3<sup>rd</sup> Building Block: Fmoc-D-nipecotic acid

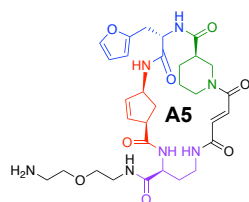

**A5:** Macrocycle was assembled using **general procedure for solid-phase peptide synthesis of macrocycle inhibitors**.

Resin: Bis-(2-aminoethyl)-ether trityl

4<sup>th</sup> Building Block: N <sup>$\alpha$</sup> -Fmoc-N <sup>$\gamma$</sup> -allyloxycarbonyl-L-2,4-diaminobutyric acid

1<sup>st</sup> Building Block: Fmoc-(+)-(1*R*,4*S*)-4-Aminocyclopent-2-enecarboxylic acid (AAP\_02\_047) I2

2<sup>nd</sup> Building Block: Fmoc- $\beta$ -(2-furyl)-Ala-OH

3<sup>rd</sup> Building Block: Fmoc-D-nipecotic acid

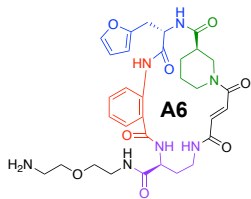

**A6:** Macrocycle was assembled using **general procedure for solid-phase peptide synthesis of macrocycle inhibitors**.

Resin: Bis-(2-aminoethyl)-ether trityl

4<sup>th</sup> Building Block: N<sup>α</sup>-Fmoc-N<sup>γ</sup>-allyloxycarbonyl-L-2,4-diaminobutyric acid

1<sup>st</sup> Building Block: N-Fmoc-anthranilic acid

2<sup>nd</sup> Building Block: Fmoc-β-(2-furyl)-Ala-OH

3<sup>rd</sup> Building Block: Fmoc-D-nipecotic acid

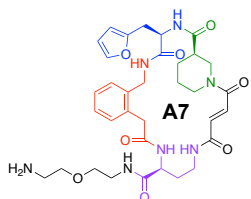

**A7:** Macrocycle was assembled using **general procedure for solid-phase peptide synthesis of macrocycle inhibitors**.

Resin: Bis-(2-aminoethyl)-ether trityl

4<sup>th</sup> Building Block: N<sup>α</sup>-Fmoc-N<sup>γ</sup>-allyloxycarbonyl-L-2,4-diaminobutyric acid

1<sup>st</sup> Building Block: Fmoc-2-aminomethyl-phenylacetic acid

2<sup>nd</sup> Building Block: Fmoc-β-(2-furyl)-D-Ala-OH

3<sup>rd</sup> Building Block: Fmoc-D-nipecotic acid

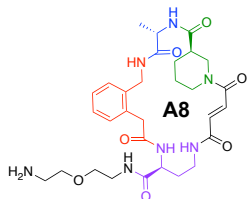

**A8:** Macrocycle was assembled using **general procedure for solid-phase peptide synthesis of macrocycle inhibitors**.

Resin: Bis-(2-aminoethyl)-ether trityl

4<sup>th</sup> Building Block: N<sup>α</sup>-Fmoc-N<sup>γ</sup>-allyloxycarbonyl-L-2,4-diaminobutyric acid

1<sup>st</sup> Building Block: Fmoc-2-aminomethyl-phenylacetic acid

2<sup>nd</sup> Building Block: Fmoc-L-alanine

3<sup>rd</sup> Building Block: Fmoc-D-nipecotic acid

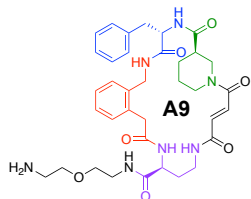

**A9:** Macrocycle was assembled using **general procedure for solid-phase peptide synthesis of macrocycle inhibitors**.

Resin: Bis-(2-aminoethyl)-ether trityl

4<sup>th</sup> Building Block: N<sup>α</sup>-Fmoc-N<sup>γ</sup>-allyloxycarbonyl-L-2,4-diaminobutyric acid

1<sup>st</sup> Building Block: Fmoc-2-aminomethyl-phenylacetic acid

2<sup>nd</sup> Building Block: Fmoc-L-phenylalanine

3<sup>rd</sup> Building Block: Fmoc-D-nipecotic acid

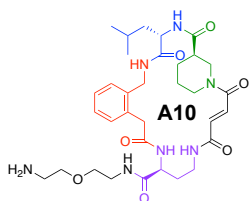

**A10:** Macrocycle was assembled using **general procedure for solid-phase peptide synthesis of macrocycle inhibitors**.

Resin: Bis-(2-aminoethyl)-ether trityl

4<sup>th</sup> Building Block: N<sup>α</sup>-Fmoc-N<sup>γ</sup>-allyloxycarbonyl-L-2,4-diaminobutyric acid

1<sup>st</sup> Building Block: Fmoc-2-aminomethyl-phenylacetic acid

2<sup>nd</sup> Building Block: Fmoc-L-Leucine

3<sup>rd</sup> Building Block: Fmoc-D-nipecotic acid

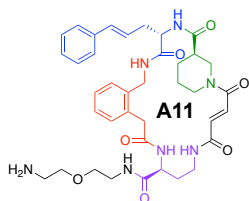

**A11:** Macrocycle was assembled using **general procedure for solid-phase peptide synthesis of macrocycle inhibitors**.

Resin: Bis-(2-aminoethyl)-ether trityl

4<sup>th</sup> Building Block: N<sup>α</sup>-Fmoc-N<sup>γ</sup>-allyloxycarbonyl-L-2,4-diaminobutyric acid

1<sup>st</sup> Building Block: Fmoc-2-aminomethyl-phenylacetic acid

2<sup>nd</sup> Building Block: Fmoc-3-styryl-L-alanine

3<sup>rd</sup> Building Block: Fmoc-D-nipecotic acid

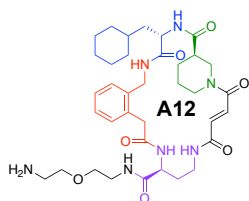

**A12:** Macrocycle was assembled using **general procedure for solid-phase peptide synthesis of macrocycle inhibitors**.

Resin: Bis-(2-aminoethyl)-ether trityl

4<sup>th</sup> Building Block: N<sup>α</sup>-Fmoc-N<sup>γ</sup>-allyloxycarbonyl-L-2,4-diaminobutyric acid

1<sup>st</sup> Building Block: Fmoc-2-aminomethyl-phenylacetic acid

2<sup>nd</sup> Building Block: Fmoc-β-cyclohexyl-L-alanine

3<sup>rd</sup> Building Block: Fmoc-D-nipecotic acid

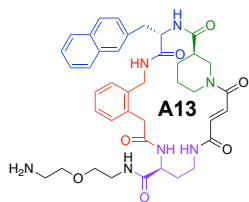

**A13:** Macrocycle was assembled using **general procedure for solid-phase peptide synthesis of macrocycle inhibitors**.

Resin: Bis-(2-aminoethyl)-ether trityl

4<sup>th</sup> Building Block: N<sup>α</sup>-Fmoc-N<sup>γ</sup>-allyloxycarbonyl-L-2,4-diaminobutyric acid

1<sup>st</sup> Building Block: Fmoc-2-aminomethyl-phenylacetic acid

2<sup>nd</sup> Building Block: Fmoc-3-(2-naphthyl)-L-alanine

3<sup>rd</sup> Building Block: Fmoc-D-nipecotic acid

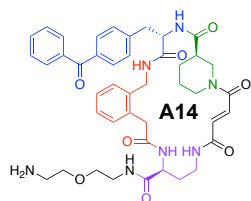

**A14:** Macrocycle was assembled using **general procedure for solid-phase peptide synthesis of macrocycle inhibitors**.

Resin: Bis-(2-aminoethyl)-ether trityl

4<sup>th</sup> Building Block: N<sup>α</sup>-Fmoc-N<sup>γ</sup>-allyloxycarbonyl-L-2,4-diaminobutyric acid

1<sup>st</sup> Building Block: Fmoc-2-aminomethyl-phenylacetic acid

2<sup>nd</sup> Building Block: Fmoc-4-benzoyl-L-phenylalanine

3<sup>rd</sup> Building Block: Fmoc-D-nipecotic acid

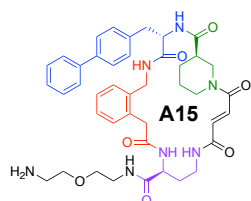

**A15:** Macrocycle was assembled using **general procedure for solid-phase peptide synthesis of macrocycle inhibitors**.

Resin: Bis-(2-aminoethyl)-ether trityl

4<sup>th</sup> Building Block: N<sup>α</sup>-Fmoc-N<sup>γ</sup>-allyloxycarbonyl-L-2,4-diaminobutyric acid

1<sup>st</sup> Building Block: Fmoc-2-aminomethyl-phenylacetic acid

2<sup>nd</sup> Building Block: Fmoc-*p*-phenyl-L-phenylalanine

3<sup>rd</sup> Building Block: Fmoc-D-nipecotic acid

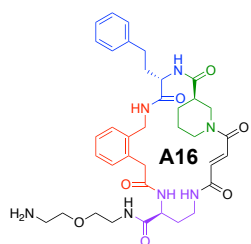

**A16:** Macrocycle was assembled using **general procedure for solid-phase peptide synthesis of macrocycle inhibitors**.

Resin: Bis-(2-aminoethyl)-ether trityl

4<sup>th</sup> Building Block: N<sup>α</sup>-Fmoc-N<sup>γ</sup>-allyloxycarbonyl-L-2,4-diaminobutyric acid

1<sup>st</sup> Building Block: Fmoc-2-aminomethyl-phenylacetic acid

2<sup>nd</sup> Building Block: Fmoc-L-Homophenylalanine

3<sup>rd</sup> Building Block: Fmoc-D-nipecotic acid

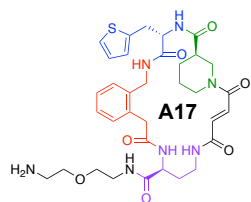

**A17:** Macrocycle was assembled using **general procedure for solid-phase peptide synthesis of macrocycle inhibitors**.

Resin: Bis-(2-aminoethyl)-ether trityl

4<sup>th</sup> Building Block: N<sup>α</sup>-Fmoc-N<sup>γ</sup>-allyloxycarbonyl-L-2,4-diaminobutyric acid

1<sup>st</sup> Building Block: Fmoc-2-aminomethyl-phenylacetic acid

2<sup>nd</sup> Building Block: Fmoc-β-(2-thienyl)-L-alanine

3<sup>rd</sup> Building Block: Fmoc-D-nipecotic acid



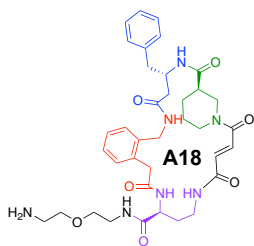

**A18:** Macrocycle was assembled using **general procedure for solid-phase peptide synthesis of macrocycle inhibitors**.

Resin: Bis-(2-aminoethyl)-ether trityl

4<sup>th</sup> Building Block: N<sup>α</sup>-Fmoc-N<sup>γ</sup>-allyloxycarbonyl-L-2,4-diaminobutyric acid

1<sup>st</sup> Building Block: Fmoc-2-aminomethyl-phenylacetic acid

2<sup>nd</sup> Building Block: Fmoc-L-β-homophenylalanine

3<sup>rd</sup> Building Block: Fmoc-D-nipecotic acid

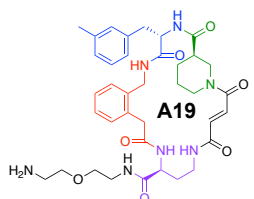

**A19:** Macrocycle was assembled using **general procedure for solid-phase peptide synthesis of macrocycle inhibitors**.

Resin: Bis-(2-aminoethyl)-ether trityl

4<sup>th</sup> Building Block: N<sup>α</sup>-Fmoc-N<sup>γ</sup>-allyloxycarbonyl-L-2,4-diaminobutyric acid

1<sup>st</sup> Building Block: Fmoc-2-aminomethyl-phenylacetic acid

2<sup>nd</sup> Building Block: Fmoc-3-methyl-L-phenylalanine

3<sup>rd</sup> Building Block: Fmoc-D-nipecotic acid

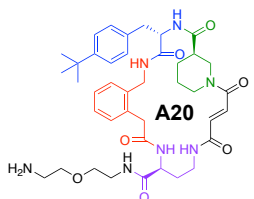

**A20:** Macrocycle was assembled using **general procedure for solid-phase peptide synthesis of macrocycle inhibitors**.

Resin: Bis-(2-aminoethyl)-ether trityl

4<sup>th</sup> Building Block: N<sup>α</sup>-Fmoc-N<sup>γ</sup>-allyloxycarbonyl-L-2,4-diaminobutyric acid

1<sup>st</sup> Building Block: Fmoc-2-aminomethyl-phenylacetic acid

2<sup>nd</sup> Building Block: Fmoc-4-*tert*-butyl-L-phenylalanine

3<sup>rd</sup> Building Block: Fmoc-D-nipecotic acid

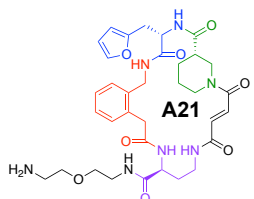

**A21:** Macrocycle was assembled using **general procedure for solid-phase peptide synthesis of macrocycle inhibitors**.

Resin: Bis-(2-aminoethyl)-ether trityl

4<sup>th</sup> Building Block: N<sup>α</sup>-Fmoc-N<sup>γ</sup>-allyloxycarbonyl-L-2,4-diaminobutyric acid

1<sup>st</sup> Building Block: Fmoc-2-aminomethyl-phenylacetic acid

2<sup>nd</sup> Building Block: Fmoc-β-(2-furyl)-Ala-OH

3<sup>rd</sup> Building Block: Fmoc-L-nipecotic acid

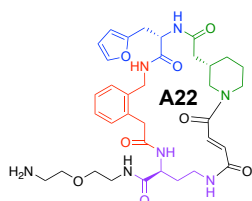

**A22:** Macrocycle was assembled using **general procedure for solid-phase peptide synthesis of macrocycle inhibitors**.

Resin: Bis-(2-aminoethyl)-ether trityl

4<sup>th</sup> Building Block: N<sup>α</sup>-Fmoc-N<sup>γ</sup>-allyloxycarbonyl-L-2,4-diaminobutyric acid

1<sup>st</sup> Building Block: Fmoc-2-aminomethyl-phenylacetic acid

2<sup>nd</sup> Building Block: Fmoc-β-(2-furyl)-Ala-OH

3<sup>rd</sup> Building Block: (S)-(1-Fmoc-piperidin-3-yl)acetic acid

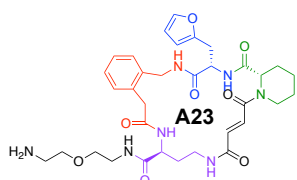

**A23:** Macrocycle was assembled using **general procedure for solid-phase peptide synthesis of macrocycle inhibitors**.

Resin: Bis-(2-aminoethyl)-ether trityl

4<sup>th</sup> Building Block: N<sup>α</sup>-Fmoc-N<sup>γ</sup>-allyloxycarbonyl-L-2,4-diaminobutyric acid

1<sup>st</sup> Building Block: Fmoc-2-aminomethyl-phenylacetic acid

2<sup>nd</sup> Building Block: Fmoc-β-(2-furyl)-Ala-OH

3<sup>rd</sup> Building Block: Fmoc-L-homoproline

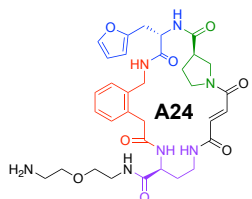

**A24:** Macrocycle was assembled using **general procedure for solid-phase peptide synthesis of macrocycle inhibitors**.

Resin: Bis-(2-aminoethyl)-ether trityl

4<sup>th</sup> Building Block: N<sup>α</sup>-Fmoc-N<sup>γ</sup>-allyloxycarbonyl-L-2,4-diaminobutyric acid

1<sup>st</sup> Building Block: Fmoc-2-aminomethyl-phenylacetic acid

2<sup>nd</sup> Building Block: Fmoc-β-(2-furyl)-Ala-OH

3<sup>rd</sup> Building Block: I3

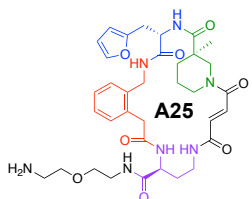

**A25:** Macrocycle was assembled using **general procedure for solid-phase peptide synthesis of macrocycle inhibitors**.

Resin: Bis-(2-aminoethyl)-ether trityl

4<sup>th</sup> Building Block: N<sup>α</sup>-Fmoc-N<sup>γ</sup>-allyloxycarbonyl-L-2,4-diaminobutyric acid

1<sup>st</sup> Building Block: Fmoc-2-aminomethyl-phenylacetic acid

2<sup>nd</sup> Building Block: Fmoc-β-(2-furyl)-Ala-OH

3<sup>rd</sup> Building Block: (R)-Fmoc-3-methyl-piperidine-3-carboxylic acid

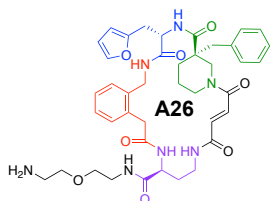

**A26:** Macrocycle was assembled using **general procedure for solid-phase peptide synthesis of macrocycle inhibitors**.

Resin: Bis-(2-aminoethyl)-ether trityl

4<sup>th</sup> Building Block: N<sup>α</sup>-Fmoc-N<sup>γ</sup>-allyloxycarbonyl-L-2,4-diaminobutyric acid

1<sup>st</sup> Building Block: Fmoc-2-aminomethyl-phenylacetic acid

2<sup>nd</sup> Building Block: Fmoc-β-(2-furyl)-Ala-OH

3<sup>rd</sup> Building Block: (S)-Fmoc-3-benzyl-piperidine-3-carboxylic acid

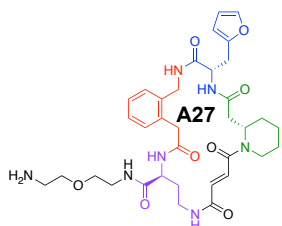

**A27:** Macrocycle was assembled using **general procedure for solid-phase peptide synthesis of macrocycle inhibitors**.

Resin: Bis-(2-aminoethyl)-ether trityl

4<sup>th</sup> Building Block: N<sup>α</sup>-Fmoc-N<sup>γ</sup>-allyloxycarbonyl-L-2,4-diaminobutyric acid

1<sup>st</sup> Building Block: Fmoc-2-aminomethyl-phenylacetic acid

2<sup>nd</sup> Building Block: Fmoc-β-(2-furyl)-Ala-OH

3<sup>rd</sup> Building Block: (S)-(1-Fmoc-piperidin-2-yl)acetic acid

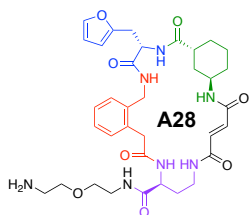

**A28:** Macrocycle was assembled using **general procedure for solid-phase peptide synthesis of macrocycle inhibitors**.

Resin: Bis-(2-aminoethyl)-ether trityl

4<sup>th</sup> Building Block: N<sup>α</sup>-Fmoc-N<sup>γ</sup>-allyloxycarbonyl-L-2,4-diaminobutyric acid

1<sup>st</sup> Building Block: Fmoc-2-aminomethyl-phenylacetic acid

2<sup>nd</sup> Building Block: Fmoc-β-(2-furyl)-Ala-OH

3<sup>rd</sup> Building Block: **I4**

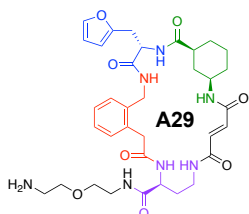

**A29:** Macrocycle was assembled using **general procedure for solid-phase peptide synthesis of macrocycle inhibitors**.

Resin: Bis-(2-aminoethyl)-ether trityl

4<sup>th</sup> Building Block: N<sup>α</sup>-Fmoc-N<sup>γ</sup>-allyloxycarbonyl-L-2,4-diaminobutyric acid

1<sup>st</sup> Building Block: Fmoc-2-aminomethyl-phenylacetic acid

2<sup>nd</sup> Building Block: Fmoc-β-(2-furyl)-Ala-OH

3<sup>rd</sup> Building Block: ((1S,3R)-3-(Fmoc-amino)cyclohexane-1-carboxylic acid)

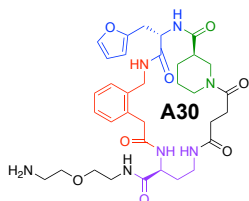

**A30:** Macrocycle was assembled using **general procedure for solid-phase peptide synthesis of macrocycle inhibitors**, using conditions stipulated in 'trans' isomer procedure, but replacing allyl-fumarate-monoester+HATU with succinic anhydride.

Resin: Bis-(2-aminoethyl)-ether trityl

4<sup>th</sup> Building Block: N<sup>α</sup>-Fmoc-N<sup>γ</sup>-allyloxycarbonyl-L-2,4-diaminobutyric acid

1<sup>st</sup> Building Block: Fmoc-2-aminomethyl-phenylacetic acid

2<sup>nd</sup> Building Block: Fmoc-β-(2-furyl)-Ala-OH

3<sup>rd</sup> Building Block: Fmoc-D-nipecotic acid

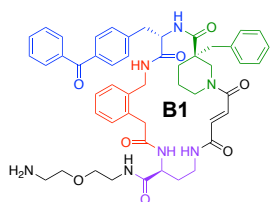

**B1:** Macrocycle was assembled using **general procedure for solid-phase peptide synthesis of macrocycle inhibitors**.

Resin: Bis-(2-aminoethyl)-ether trityl

4<sup>th</sup> Building Block: N<sup>α</sup>-Fmoc-N<sup>γ</sup>-allyloxycarbonyl-L-2,4-diaminobutyric acid

1<sup>st</sup> Building Block: Fmoc-2-aminomethyl-phenylacetic acid

2<sup>nd</sup> Building Block: Fmoc-4-benzoyl-L-phenylalanine

3<sup>rd</sup> Building Block: (S)-Fmoc-3-benzyl-piperidine-3-carboxylic acid

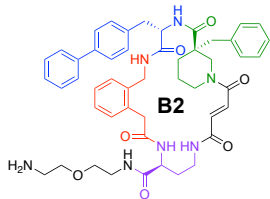

**B2:** Macrocycle was assembled using **general procedure for solid-phase peptide synthesis of macrocycle inhibitors**.

Resin: Bis-(2-aminoethyl)-ether trityl

4<sup>th</sup> Building Block: N<sup>α</sup>-Fmoc-N<sup>γ</sup>-allyloxycarbonyl-L-2,4-diaminobutyric acid

1<sup>st</sup> Building Block: Fmoc-2-aminomethyl-phenylacetic acid

2<sup>nd</sup> Building Block: Fmoc-*p*-phenyl-L-phenylalanine

3<sup>rd</sup> Building Block: (S)-Fmoc-3-benzyl-piperidine-3-carboxylic acid

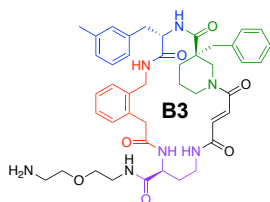

**B3:** Macrocycle was assembled using **general procedure for solid-phase peptide synthesis of macrocycle inhibitors**.

Resin: Bis-(2-aminoethyl)-ether trityl

4<sup>th</sup> Building Block: N<sup>α</sup>-Fmoc-N<sup>γ</sup>-allyloxycarbonyl-L-2,4-diaminobutyric acid

1<sup>st</sup> Building Block: Fmoc-2-aminomethyl-phenylacetic acid

2<sup>nd</sup> Building Block: Fmoc-3-methyl-L-phenylalanine

3<sup>rd</sup> Building Block: (S)-Fmoc-3-benzyl-piperidine-3-carboxylic acid

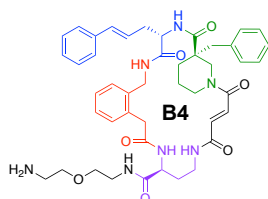

**B4:** Macrocycle was assembled using **general procedure for solid-phase peptide synthesis of macrocycle inhibitors**.

Resin: Bis-(2-aminoethyl)-ether trityl

4<sup>th</sup> Building Block: N<sup>α</sup>-Fmoc-N<sup>γ</sup>-allyloxycarbonyl-L-2,4-diaminobutyric acid

1<sup>st</sup> Building Block: Fmoc-2-aminomethyl-phenylacetic acid

2<sup>nd</sup> Building Block: Fmoc-3-styryl-L-alanine

3<sup>rd</sup> Building Block: (S)-Fmoc-3-benzyl-piperidine-3-carboxylic acid

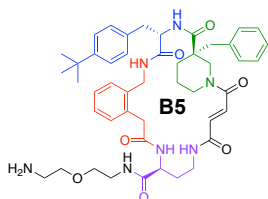

**B5:** Macrocycle was assembled using **general procedure for solid-phase peptide synthesis of macrocycle inhibitors**.

Resin: Bis-(2-aminoethyl)-ether trityl

4<sup>th</sup> Building Block: N<sup>α</sup>-Fmoc-N<sup>γ</sup>-allyloxycarbonyl-L-2,4-diaminobutyric acid

1<sup>st</sup> Building Block: Fmoc-2-aminomethyl-phenylacetic acid

2<sup>nd</sup> Building Block: Fmoc-4-*tert*-butyl-L-phenylalanine

3<sup>rd</sup> Building Block: (S)-Fmoc-3-benzyl-piperidine-3-carboxylic acid

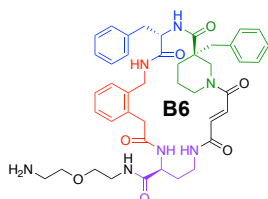

**B6:** Macrocycle was assembled using **general procedure for solid-phase peptide synthesis of macrocycle inhibitors**.

Resin: Bis-(2-aminoethyl)-ether trityl

4<sup>th</sup> Building Block: N<sup>α</sup>-Fmoc-N<sup>γ</sup>-allyloxycarbonyl-L-2,4-diaminobutyric acid

1<sup>st</sup> Building Block: Fmoc-2-aminomethyl-phenylacetic acid

2<sup>nd</sup> Building Block: Fmoc-L-phenylalanine

3<sup>rd</sup> Building Block: (S)-Fmoc-3-benzyl-piperidine-3-carboxylic acid

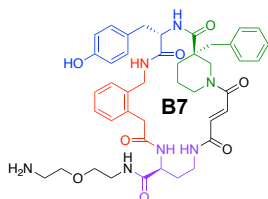

**B7:** Macrocycle was assembled using **general procedure for solid-phase peptide synthesis of macrocycle inhibitors**.

Resin: Bis-(2-aminoethyl)-ether trityl

4<sup>th</sup> Building Block: N<sup>α</sup>-Fmoc-N<sup>γ</sup>-allyloxycarbonyl-L-2,4-diaminobutyric acid

1<sup>st</sup> Building Block: Fmoc-2-aminomethyl-phenylacetic acid

2<sup>nd</sup> Building Block: **Fmoc-O-*tert*-butyl-L-tyrosine**

3<sup>rd</sup> Building Block: (S)-Fmoc-3-benzyl-piperidine-3-carboxylic acid

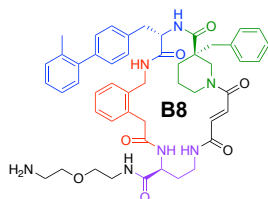

**B8:** Compound was synthesized using **Generalized procedure A for Suzuki-Miyaura cross-coupling of macrocycles** using **(4Br)B6** and 2-methylphenylboronic acid. Yield: 78%

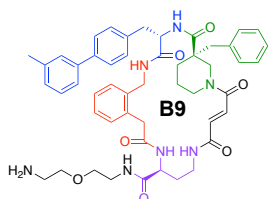

**B9:** Compound was synthesized using **Generalized procedure A for Suzuki-Miyaura cross-coupling of macrocycles** using **(4Br)B6** and 3-methylphenylboronic acid. Yield: 64%

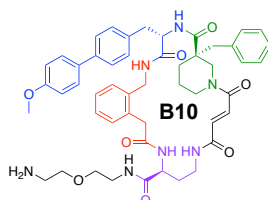

**B10:** Compound was synthesized using **Generalized procedure A for Suzuki-Miyaura cross-coupling of macrocycles** using **(4Br)B6** and 4-methoxyphenylboronic acid. Yield: 21%

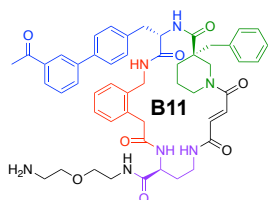

**B11:** Compound was synthesized using **Generalized procedure A for Suzuki-Miyaura cross-coupling of macrocycles** using **(4Br)B6** and 3-acetylphenylboronic acid. Yield: 37%

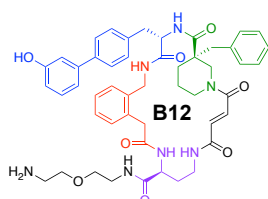

**B12:** Compound was synthesized using **Generalized procedure A for Suzuki-Miyaura cross-coupling of macrocycles** using **(4Br)B6** and 3-hydroxyphenylboronic acid. Yield: 87%

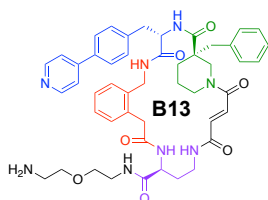

**B13:** Macrocycle was assembled using **general procedure for solid-phase peptide synthesis of macrocycle inhibitors**.

Resin: Bis-(2-aminoethyl)-ether trityl

4<sup>th</sup> Building Block: N<sup>α</sup>-Fmoc-N<sup>γ</sup>-allyloxycarbonyl-L-2,4-diaminobutyric acid

1<sup>st</sup> Building Block: Fmoc-2-aminomethyl-phenylacetic acid

2<sup>nd</sup> Building Block: I5

3<sup>rd</sup> Building Block: (S)-Fmoc-3-benzyl-piperidine-3-carboxylic acid

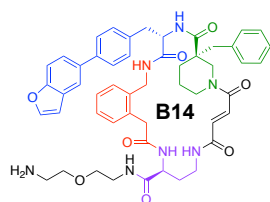

**B14:** Compound was synthesized using **Generalized procedure A for Suzuki-Miyaura cross-coupling of macrocycles** using **(4Br)B6** and benzofuran-5-yl-5-boronic acid. Yield: quantitative

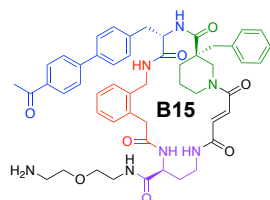

**B15 Compound:** Compound was synthesized using **Generalized procedure A for Suzuki-Miyaura cross-coupling of macrocycles** using **(4Br)B6** and 4-acetylphenylboronic acid. Yield: 39%

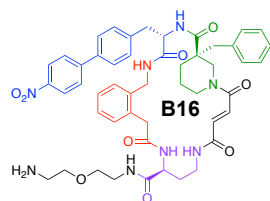

**B16:** Compound was synthesized using **Generalized procedure A for Suzuki-Miyaura cross-coupling of macrocycles** using **(4Br)B6** and 4-nitrophenylboronic acid. Yield: 60%

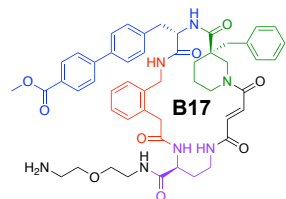

**B17:** Compound was synthesized using **Generalized procedure A for Suzuki-Miyaura cross-coupling of macrocycles** using **(4Br)B6** and 4-Methoxycarbonylphenylboronic. Yield: 37%

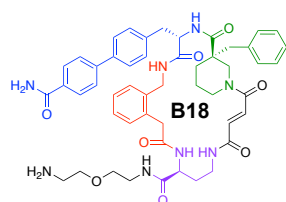

**B18:** Compound was synthesized using **Generalized procedure A for Suzuki-Miyaura cross-coupling of macrocycles** using **(4Br)B6** and 4-aminocarbonylphenylboronic acid. Yield: 49%

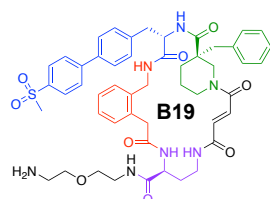

**B19:** Compound was synthesized using **Generalized procedure A** for **Suzuki-Miyaura cross-coupling of macrocycles** using **(4Br)B6** and 4-(methanesulfonyl)phenylboronic acid. Yield: 86%

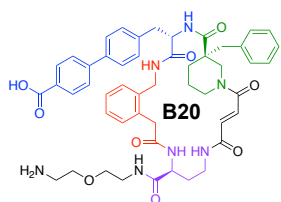

**B20:** Compound was synthesized using **Generalized procedure A** for **Suzuki-Miyaura cross-coupling of macrocycles** using **(4Br)B6** and 4-(*tert*-Butoxycarbonyl)phenylboronic acid. *Tert*-butyl protected product was treated with 1 mL TFA for 1 hour, and re-purified under same HPLC conditions to yield carboxylic acid product. Yield: 95%

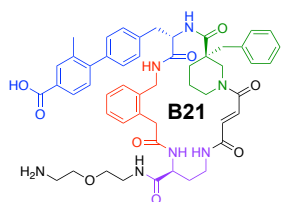

**B21:** Compound was synthesized using **Generalized procedure A** for **Suzuki-Miyaura cross-coupling of macrocycles** using **(4Br)B6** and 4-carboxy-2-methylphenylboronic acid. Yield: 35%

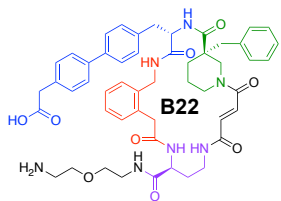

**B22:** Compound was synthesized using **Generalized procedure A** for **Suzuki-Miyaura cross-coupling of macrocycles** using **(4Br)B6** and 4-carboxymethylphenylboronic acid. Yield: 19%

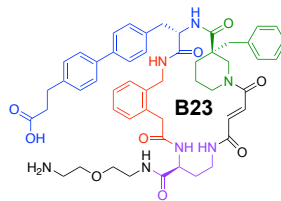

**B23:** Compound was synthesized using **Generalized procedure A** for **Suzuki-Miyaura cross-coupling of macrocycles** using **(4Br)B6** and 4-cyanomethylphenylboronic acid. Yield: 21%

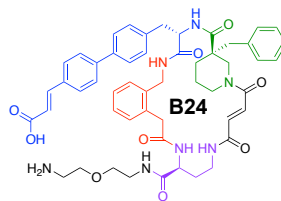

**B24:** Compound was synthesized using **Generalized procedure B** for **Suzuki-Miyaura cross-coupling of macrocycles** using **(4Br)B6** and 4-(*E*-2-carboxyvinyl)phenylboronic acid. Yield: 20%



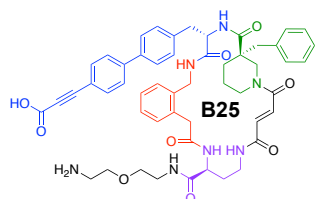

**B25:** Compound was synthesized using **Generalized procedure A for Suzuki-Miyaura cross-coupling of macrocycles** using **(4Br)B6** and **I6b**. *Tert*-butyl protected product was treated with 1 mL TFA for 1 hour, and re-purified under same HPLC conditions to yield carboxylic acid product. Yield: 15%

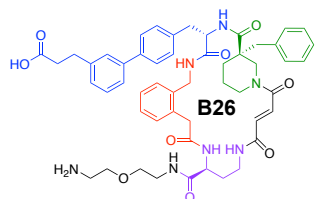

**B26:** Compound was synthesized using **Generalized procedure A for Suzuki-Miyaura cross-coupling of macrocycles** using **(4Br)B6** and 3-(carboxyethyl)phenylboronic acid. Yield: 9%

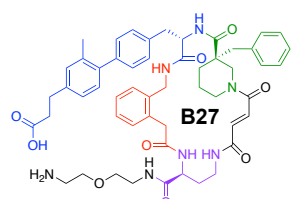

**B27:** Compound was synthesized using **Generalized procedure A for Suzuki-Miyaura cross-coupling of macrocycles** using **(4Br)B6** and 4-(2-carboxyethyl)-2-methylphenylboronic acid. Yield: 16%

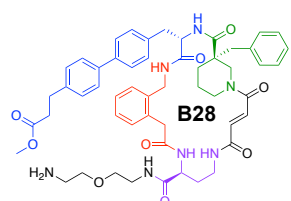

**B28:** Compound was synthesized using **Generalized procedure A for Suzuki-Miyaura cross-coupling of macrocycles** using **(4Br)B6** and 4-(methoxycarbonyl)ethylphenylboronic acid. Yield: 72%

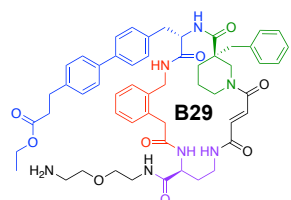

**B29:** Compound was synthesized using **Generalized procedure A for Suzuki-Miyaura cross-coupling of macrocycles** using **(4Br)B6** and 4-(2-ethoxycarbonyl)ethylphenylboronic acid. Yield: 29%

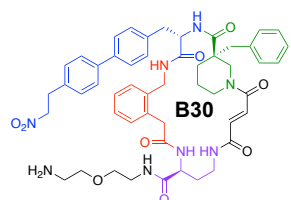

**B30:** Compound was synthesized using **Generalized procedure A for Suzuki-Miyaura cross-coupling of macrocycles** using **(4Br)B6** and 4-(2-nitroethyl)phenylboronic acid. Yield: 18%

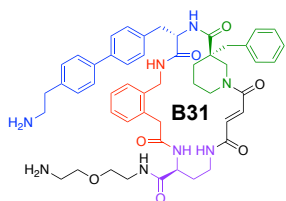

**B31:** Compound was synthesized using **Generalized procedure A for Suzuki-Miyaura cross-coupling of macrocycles** using **(4Br)B6** and 4-(2-[(tert-Butoxycarbonyl)amino]ethyl)phenyl)boronic acid. Prior to HPLC purification, crude reaction was concentrated under vacuum and treated with 0.3 mL TFA for 1 hour for boc-deprotection. Reaction was concentrated and purified as stipulated in generalized procedure. Yield: 48%

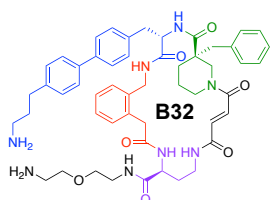

**B32:** Compound was synthesized using **Generalized procedure A for Suzuki-Miyaura cross-coupling of macrocycles** using **(4Br)B6** and [4-(3-[[[(tert-Butoxy)carbonyl]amino]propyl]phenyl)]boronic acid. Prior to HPLC purification, crude reaction was concentrated under vacuum and treated with 0.3 mL TFA for 1 hour for boc-deprotection. Reaction was concentrated and purified as stipulated in generalized procedure. Yield: 20%

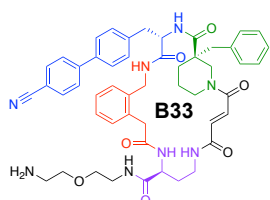

**B33:** Compound was synthesized using **Generalized procedure A for Suzuki-Miyaura cross-coupling of macrocycles** using **(4Br)B6** and 4-cyanophenylboronic acid. Yield: 30%

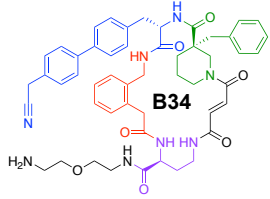

**B34:** Compound was synthesized using **Generalized procedure A for Suzuki-Miyaura cross-coupling of macrocycles** using **(4Br)B6** and 4-cyanomethylphenylboronic acid. Yield: 46%

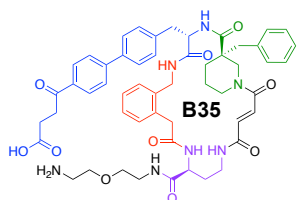

**B35:** Compound was synthesized using **Generalized procedure A for Suzuki-Miyaura cross-coupling of macrocycles** using **(4Br)B6** and **I7b**. Yield: 6%

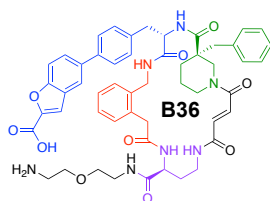

**B36:** Compound was synthesized using **Generalized procedure A** for Suzuki-Miyaura cross-coupling of macrocycles using **(4Br)B6** and **I8b**. Yield: 12%

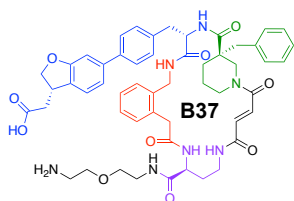

**B37:** Compound was synthesized using **Generalized procedure A** for Suzuki-Miyaura cross-coupling of macrocycles using **(4Br)B6** and **I9d**. Yield: 25%

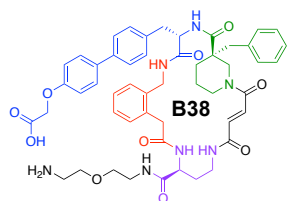

**B38:** Compound was synthesized using **Generalized procedure A** for Suzuki-Miyaura cross-coupling of macrocycles using **(4Br)B6** and 4-(carboxymethoxy)phenylboronic acid. Yield: 9%

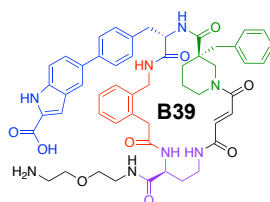

**B39:** Compound was synthesized using **Generalized procedure B** for Suzuki-Miyaura cross-coupling of macrocycles using **(4Br)B6** and **I10**. Yield: 5%

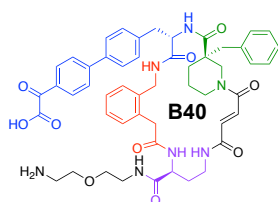

**B40:** Adopting a previously reported protocol<sup>9</sup>, into a 10 mL screw-top vial, **(4Br)B6** (0.011 mmol, 1.0 eq), **I11** (03\_263) (0.11 mmol, 10 eq), Bis(dibenzylideneacetone)palladium(0) (0.0011 mmol, 0.1 eq), Tri-*tert*-butylphosphonium tetrafluoroborate (0.0046 mmol, 0.4 eq), and potassium carbonate (0.11 mmol, 10 eq) were combined and sealed with a septum. Flask was evacuated and refilled with N<sub>2</sub> three times and left under N<sub>2</sub>. Degassed 10:1 Toluene/H<sub>2</sub>O (0.05 M), was then added to the sealed flask and allowed to stir at 60° C for 16 hours. After cooling, the reaction was cooled and solvent was removed under high-vac. Solid residue was dissolved in a minimal amount of 3:1 DMF/water with 5% TFA and filtered through 0.22 μL Ultrafree®-MC Centrifugal Filters (Milipore-Sigma). Sample was then purified by reverse HPLC, with a 10-60% Fractions that contained product was then freeze dried to produce a white powder. Yield: 10% (03\_265)

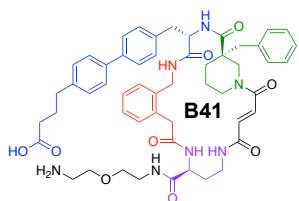

**B41:** Compound was synthesized using **Generalized procedure A** for Suzuki-Miyaura cross-coupling of macrocycles using **(4Br)B6** and **I12b**. Yield: 14%

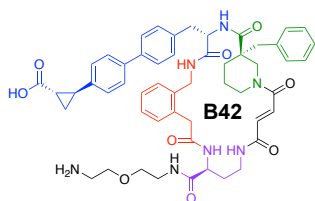

**B42:** Compound was synthesized using **Generalized procedure B** for Suzuki-Miyaura cross-coupling of macrocycles using **(4Br)B6** and **I13b**. Yield: 31%

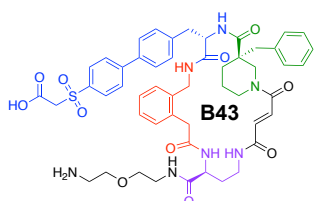

**B43:** Compound was synthesized using **Generalized procedure A** for Suzuki-Miyaura cross-coupling of macrocycles using **(4Br)B6** and **I14c**. *Tert*-butyl protected product was treated with 1 mL TFA for 1 hour, and re-purified under same HPLC conditions to yield carboxylic acid product. Yield: 11%

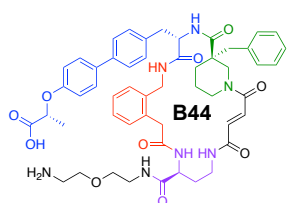

**B44:** Compound was synthesized using **Generalized procedure A** for Suzuki-Miyaura cross-coupling of macrocycles using **(4Br)B6** and **I15d**. Yield: 8%

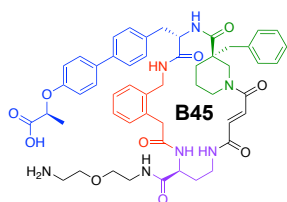

**B45:** Compound was synthesized using **Generalized procedure A** for Suzuki-Miyaura cross-coupling of macrocycles using **(4Br)B6** and **I16b**. Yield: 16%

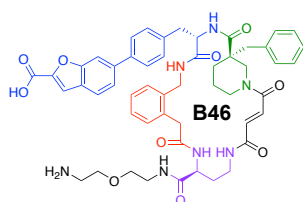

**B46:** Compound was synthesized using **Generalized procedure B** for Suzuki-Miyaura cross-coupling of macrocycles using **(4Br)B6** and **I17d**. Yield: 4%

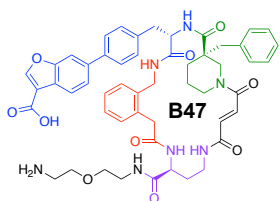

**B47:** Compound was synthesized using **Generalized procedure B** for Suzuki-Miyaura cross-coupling of macrocycles using **(4Br)B6** and **I18c**. Yield: 8%

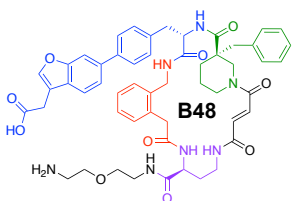

**B48:** Compound was synthesized using **Generalized procedure A** for Suzuki-Miyaura cross-coupling of macrocycles using **(4Br)B6** and **I19e**. Yield: 5%

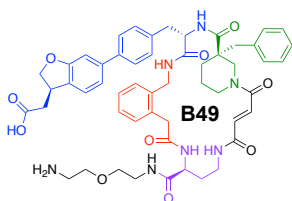

**B49:** Compound was synthesized using **Generalized procedure A** for Suzuki-Miyaura cross-coupling of macrocycles using **(4Br)B6** and **I20d**. Yield: 5%

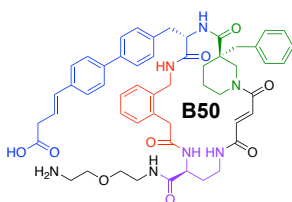

**B50:** Compound was synthesized using **Generalized procedure B** for Suzuki-Miyaura cross-coupling of macrocycles using **(4Br)B6** and **I21b**. Yield: 8%

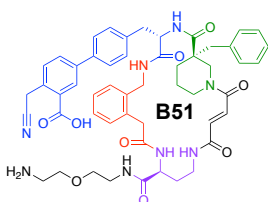

**B51:** Compound was synthesized using **Generalized procedure B** for Suzuki-Miyaura cross-coupling of macrocycles using **(4Br)B6** and **I22c**. Yield: 18%

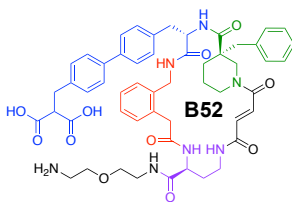

**B52:** Compound was synthesized using **Generalized procedure A** for Suzuki-Miyaura cross-coupling of macrocycles using **(4Br)B6** and **I23**. *Tert*-butyl protected product was treated with 1 mL TFA for 1 hour, and re-purified under same HPLC conditions to yield carboxylic acid product. Yield: 10%

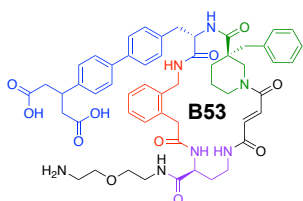

**B53:** Compound was synthesized using **Generalized procedure A for Suzuki-Miyaura cross-coupling of macrocycles** using **(4Br)B6** and **I24c**. *Tert*-butyl protected product was treated with 1 mL TFA for 1 hour, and re-purified under same HPLC conditions to yield carboxylic acid product. Yield: 21%

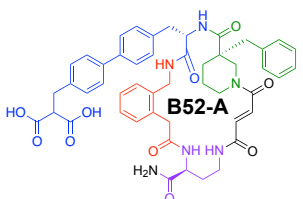

**B52-A:** Compound was synthesized using **Generalized procedure A for Suzuki-Miyaura cross-coupling of macrocycles** using **(4Br)B6-A** and **I23**. *Tert*-butyl protected product was treated with 1 mL TFA for 1 hour, and re-purified under same HPLC conditions to yield carboxylic acid product. Yield: 40%

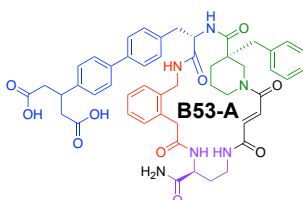

**B53-A:** Compound was synthesized using **Generalized procedure A for Suzuki-Miyaura cross-coupling of macrocycles** using **(4Br)B6-A** and **I24c**. *Tert*-butyl protected product was treated with 1 mL TFA for 1 hour, and re-purified under same HPLC conditions to yield carboxylic acid product. Yield: 86%

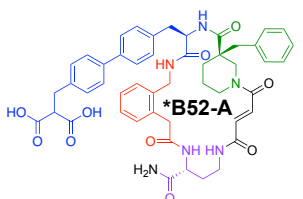

**\*B52-A:** Compound was synthesized using **Generalized procedure A for Suzuki-Miyaura cross-coupling of macrocycles** using **\*(4Br)B6-A** and **I23**. *Tert*-butyl protected product was treated with 1 mL TFA for 1 hour, and re-purified under same HPLC conditions to yield carboxylic acid product. Yield: 21%.

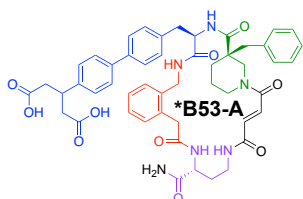

**\*B53-A:** Compound was synthesized using **Generalized procedure A for Suzuki-Miyaura cross-coupling of macrocycles** using **\*(4Br)B6-A** and **I24c**. *Tert*-butyl protected product was treated with 1 mL TFA for 1 hour, and re-purified under same HPLC conditions to yield carboxylic acid product. Yield: 85%.

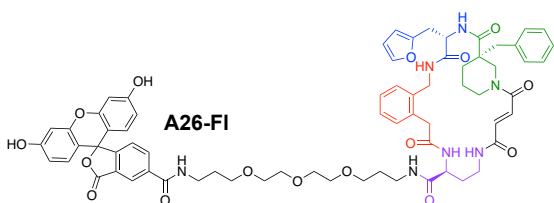

**A26-FI:** Macrocycle was assembled using **general procedure for solid-phase peptide synthesis of macrocycle inhibitors**. Prior to acidic cleavage, resin was suspended with three 1-hour treatments of 1M hydroxybenzotriazole monohydrate dissolved in 1:1 CH<sub>2</sub>Cl<sub>2</sub>/Trifluoroethanol to remove Mmt group. 5-carboxyfluorescein (5 eq) and (HATU, 4.75 equiv.) were dissolved in a separate flask in ~10-15 mL DMF then treated with *N,N'*-diisopropylethylamine (DIPEA, 10 eq) for 5 minutes, observing a color change. This flask was then transferred to resin swollen in ~10 mL DMF and allowed to mix for 24 hours. Fluorescein labeled peptide were then cleaved from resin and purified as described in general procedure.

Resin: Universal PEG NovaTag™\_Resin

**4<sup>th</sup> Building Block:** N<sup>α</sup>-Fmoc-N<sup>γ</sup>-allyloxycarbonyl-L-2,4-diaminobutyric acid

**1<sup>st</sup> Building Block:** Fmoc-2-aminomethyl-phenylacetic acid

**2<sup>nd</sup> Building Block:** Fmoc-β-(2-furyl)-Ala-OH

**3<sup>rd</sup> Building Block:** (S)-Fmoc-3-benzyl-piperidine-3-carboxylic acid

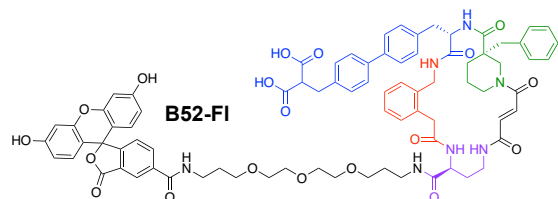

**B52-FI:** Compound was synthesized using **Generalized procedure A for Suzuki-Miyaura cross-coupling of macrocycles** using **(4Br)B6-FI** and **I23**. *Tert*-butyl protected product was treated with 1 mL TFA for 1 hour, and re-purified under same HPLC conditions to yield carboxylic acid product. Yield: 32%.

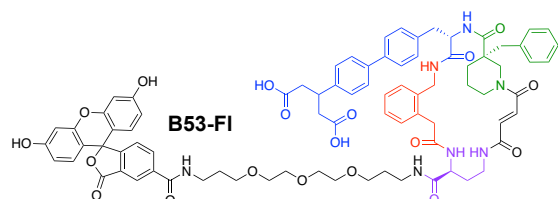

**B53-FI:** Compound was synthesized using **Generalized procedure A for Suzuki-Miyaura cross-coupling of macrocycles** using **(4Br)B6-FI** and **I24c**. *Tert*-butyl protected product was treated with 1 mL TFA for 1 hour, and re-purified under same HPLC conditions to yield carboxylic acid product. Yield: 33%

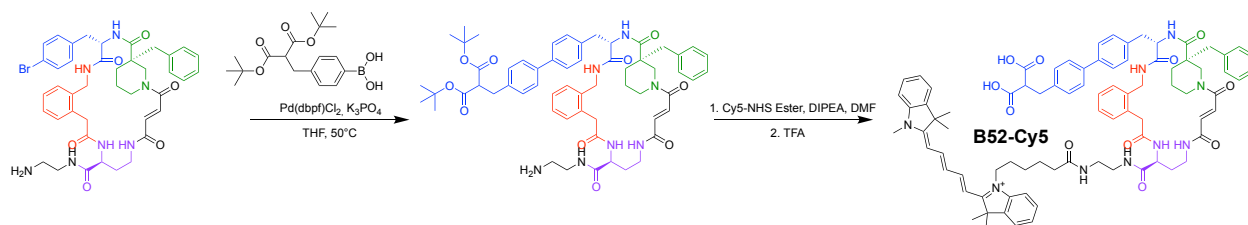

**B52-Cy5:** Compound was synthesized using **Generalized procedure A for Suzuki-Miyaura cross-coupling of macrocycles** using **(4Br)B6-B** and **I23**. *Tert*-butyl protected product was dissolved in a 1.5 mL Eppendorf tube with 100  $\mu$ L DMF and mixed with DIPEA (5 eq.). Cy5-NHS ester (Lumiprobe) (2 eq.) dissolved in 50  $\mu$ L DMF was then added to the flask allowed to stir for 1 hour. Resulting crude mixture was purified under same HPLC conditions to yield Cy5 coupled product. This product was then treated with 1 mL TFA for 1 hour, and re-purified under same HPLC conditions to yield carboxylic acid product. Yield: 25%.

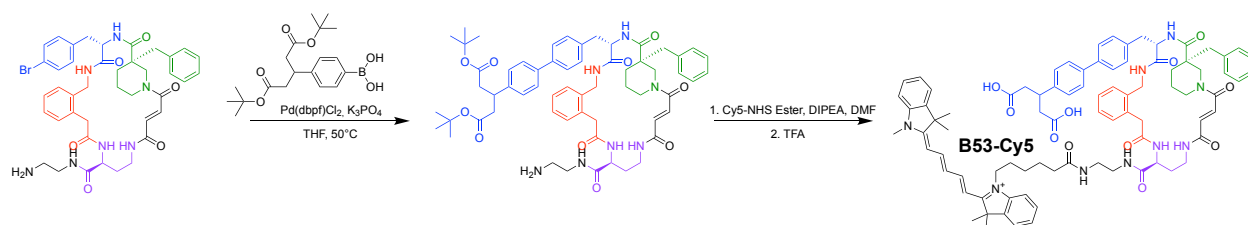

**B53-Cy5:** Compound was synthesized using **Generalized procedure A for Suzuki-Miyaura cross-coupling of macrocycles** using **(4Br)B6-B** and **I24c**. *Tert*-butyl protected product was dissolved in a 1.5 mL Eppendorf tube with 100  $\mu$ L DMF and mixed with DIPEA (5 eq.). Cy5-NHS ester (Lumiprobe) (2 eq.) dissolved in 50  $\mu$ L DMF was then added to the flask allowed to stir for 1 hour. Resulting crude mixture was purified under same HPLC conditions to yield Cy5 coupled product. This product was then treated with 1 mL TFA for 1 hour, and re-purified under same HPLC conditions to yield carboxylic acid product. Yield: 6%.

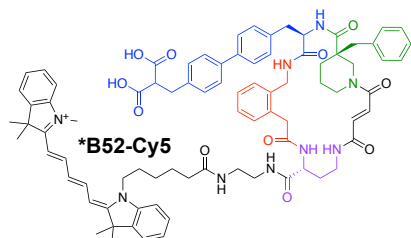

**\*B52-Cy5:** Compound was synthesized as described in **B52-Cy5** using **\*(4Br)B6-B** as starting material. Yield: 6%

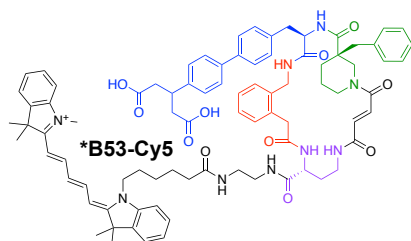

**\*B53-Cy5:** Compound was synthesized as described in **B53-Cy5** using **\*(4Br)B6-B** as starting material. Yield: 8%.

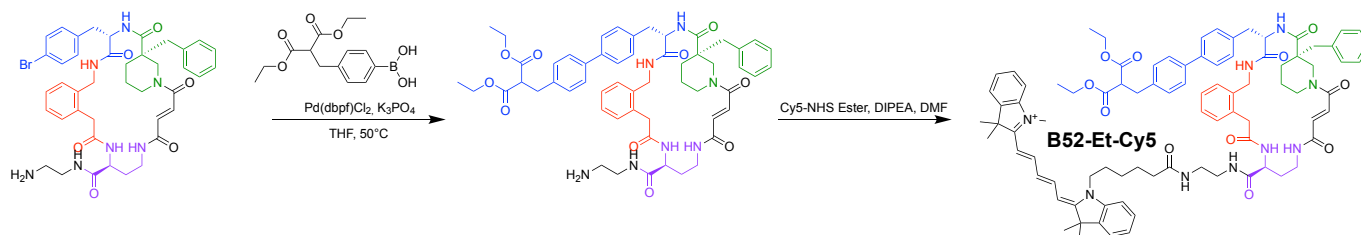

**B52-Et-Cy5:** Compound was synthesized using **Generalized procedure A for Suzuki-Miyaura cross-coupling of macrocycles** using **(4Br)B6-B** and **I29b**. Suzuki product was dissolved in a 1.5 mL Eppendorf tube with 100  $\mu$ L DMF and mixed with DIPEA (5 eq.). Cy5-NHS ester (Lumiprobe) (2 eq.) dissolved in 50  $\mu$ L DMF was then added to the flask allowed to stir for 1 hour. Excess Cy5-NHS ester was quenched with N-Acetyethylenediamine (10 eq.), to make **Cy5-enAc**. Resulting crude mixture was purified under same HPLC conditions to yield the two Cy5 coupled products. Yield: 20%

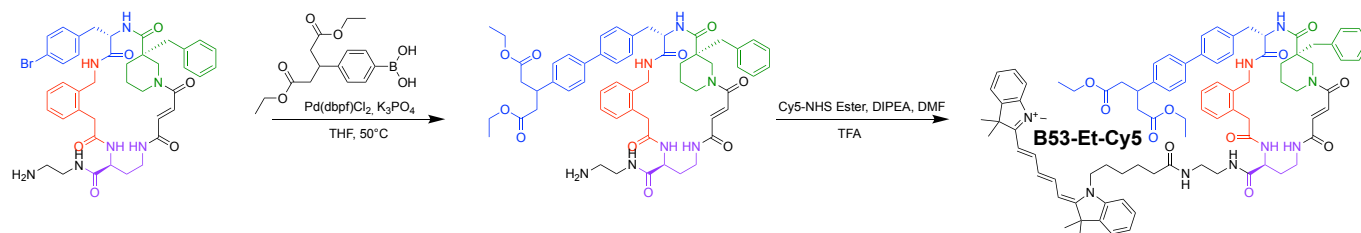

**B53-Et-Cy5:** Compound was synthesized using **Generalized procedure A for Suzuki-Miyaura cross-coupling of macrocycles** using **(4Br)B6-B** and **I30c**. Suzuki product was dissolved in a 1.5 mL Eppendorf tube with 100  $\mu$ L DMF and mixed with DIPEA (5 eq.). Cy5-NHS ester (Lumiprobe) (2 eq.) dissolved in 50  $\mu$ L DMF was then added to the flask allowed to stir for 1 hour. Excess Cy5-NHS ester was quenched with N-Acetyethylenediamine (10 eq.), to make **Cy5-enAc**. Resulting crude mixture was purified under same HPLC conditions to yield the two Cy5 coupled products. Yield: 21%



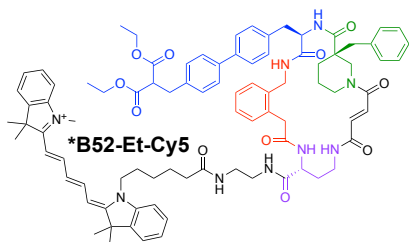

**\*B52-Et-Cy5:** Compound was synthesized as described in **B52-Et-Cy5** using **\*(4Br)B6-B** as starting material. Yield: 18%

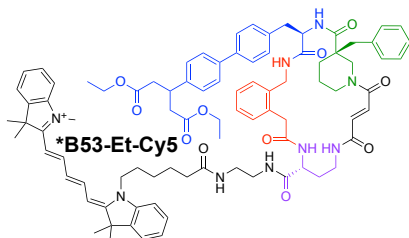

**\*B53-Et-Cy5:** Compound was synthesized as described in **B53-Et-Cy5** using **\*(4Br)B6-B** as starting material. Yield: 17%.

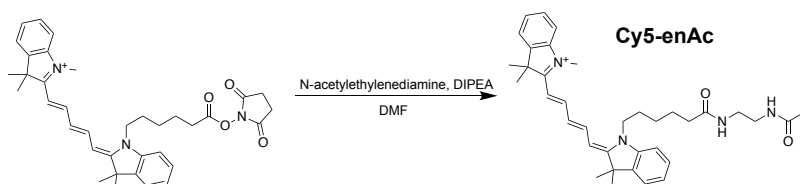

**Cy5-enAc:** Compound was isolated from excess Cy5-NHS ester that was quenched with N-Acetyllethylenediamine (10 eq.) during syntheses of **B52-Et-Cy5** and **B53-Et-Cy5**. HPLC purification was able to separate **Cy5-enAc** successfully from **B52-Et-Cy5** and **B53-Et-Cy5**.

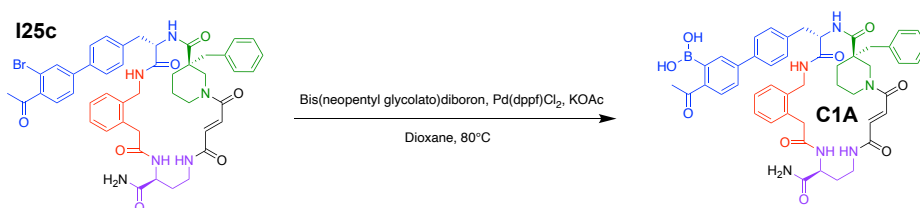

**C1A:** A mixture of **I25c** (0.008 mmol, 1 eq.), bis (neopentyl glycolato) diboron (0.08 mmol, 10 eq.), [1,1-Bis(diphenylphosphino)ferrocene]dichloropalladium(II) (0.001 mmol, 0.2 eq.), and KOAc (0.08 mmol, 10 eq.) was dissolved in 1 mL 1,4-dioxane (0.008 M). The reaction was stirred for thirty minutes at 80°C. The reaction was then cooled down to room temperature, solvent removed under vacuum, dissolved in DMF, and filtered. The crude product was purified by reverse-phase HPLC using 10-80% acetonitrile in water in 0.1% trifluoroacetic acid and lyophilized to afford **C1A**. Yield: 20% yield

Authors Note: Bis(neopentyl glycolato) and the shorter 30-minute reaction time was due to significant protodeborylation observed with bis(pinacolato)diboron and longer reaction times.

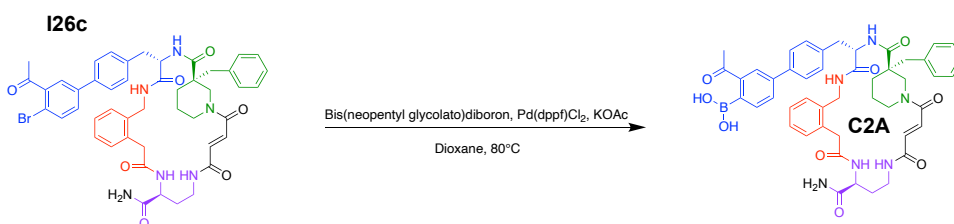

**C2A:** Compound was synthesized and purified as described in **C1A** with **I26c**, affording **C2A**. Yield: 29%

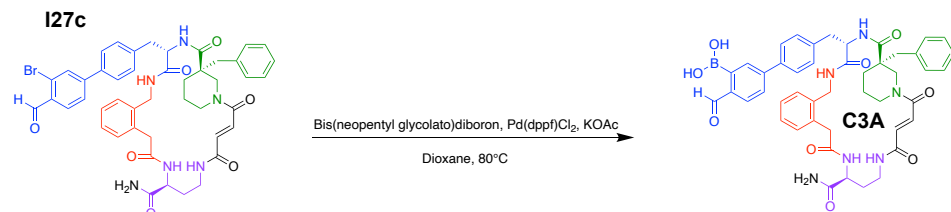

**C3A:** Compound was synthesized and purified as described in **C1A** with **I27c**, affording **C3A**. Yield: 14%

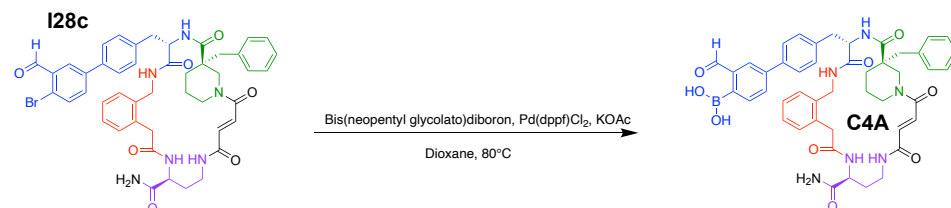

**C4A:** Compound was synthesized and purified as described in **C1A** with **I28c**, affording **C4A**. Some impurities were observed by  $^1\text{H-NMR}$  that were unable to be removed by HPLC, compound was tested without further purification. Yield: 4%

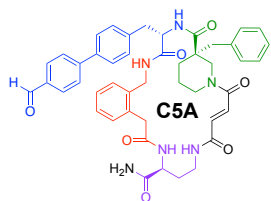

**C5A:** Compound was synthesized according to **Generalized procedure A for Suzuki-Miyaura cross-coupling of macrocycles** with **(4Br)B6-A** and 4-formylphenylboronic acid, affording **C5A**. Yield: 16%

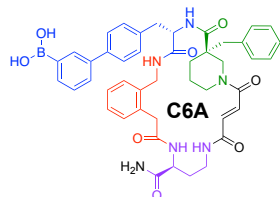

**C6A:** Compound was synthesized according to **Generalized procedure A for Suzuki-Miyaura cross-coupling of macrocycles** with **(4Br)B6-A** and benzene 1,3-diboronic acid, affording **C6A**. Yield: 13%

# <sup>1</sup>H-NMR Spectra

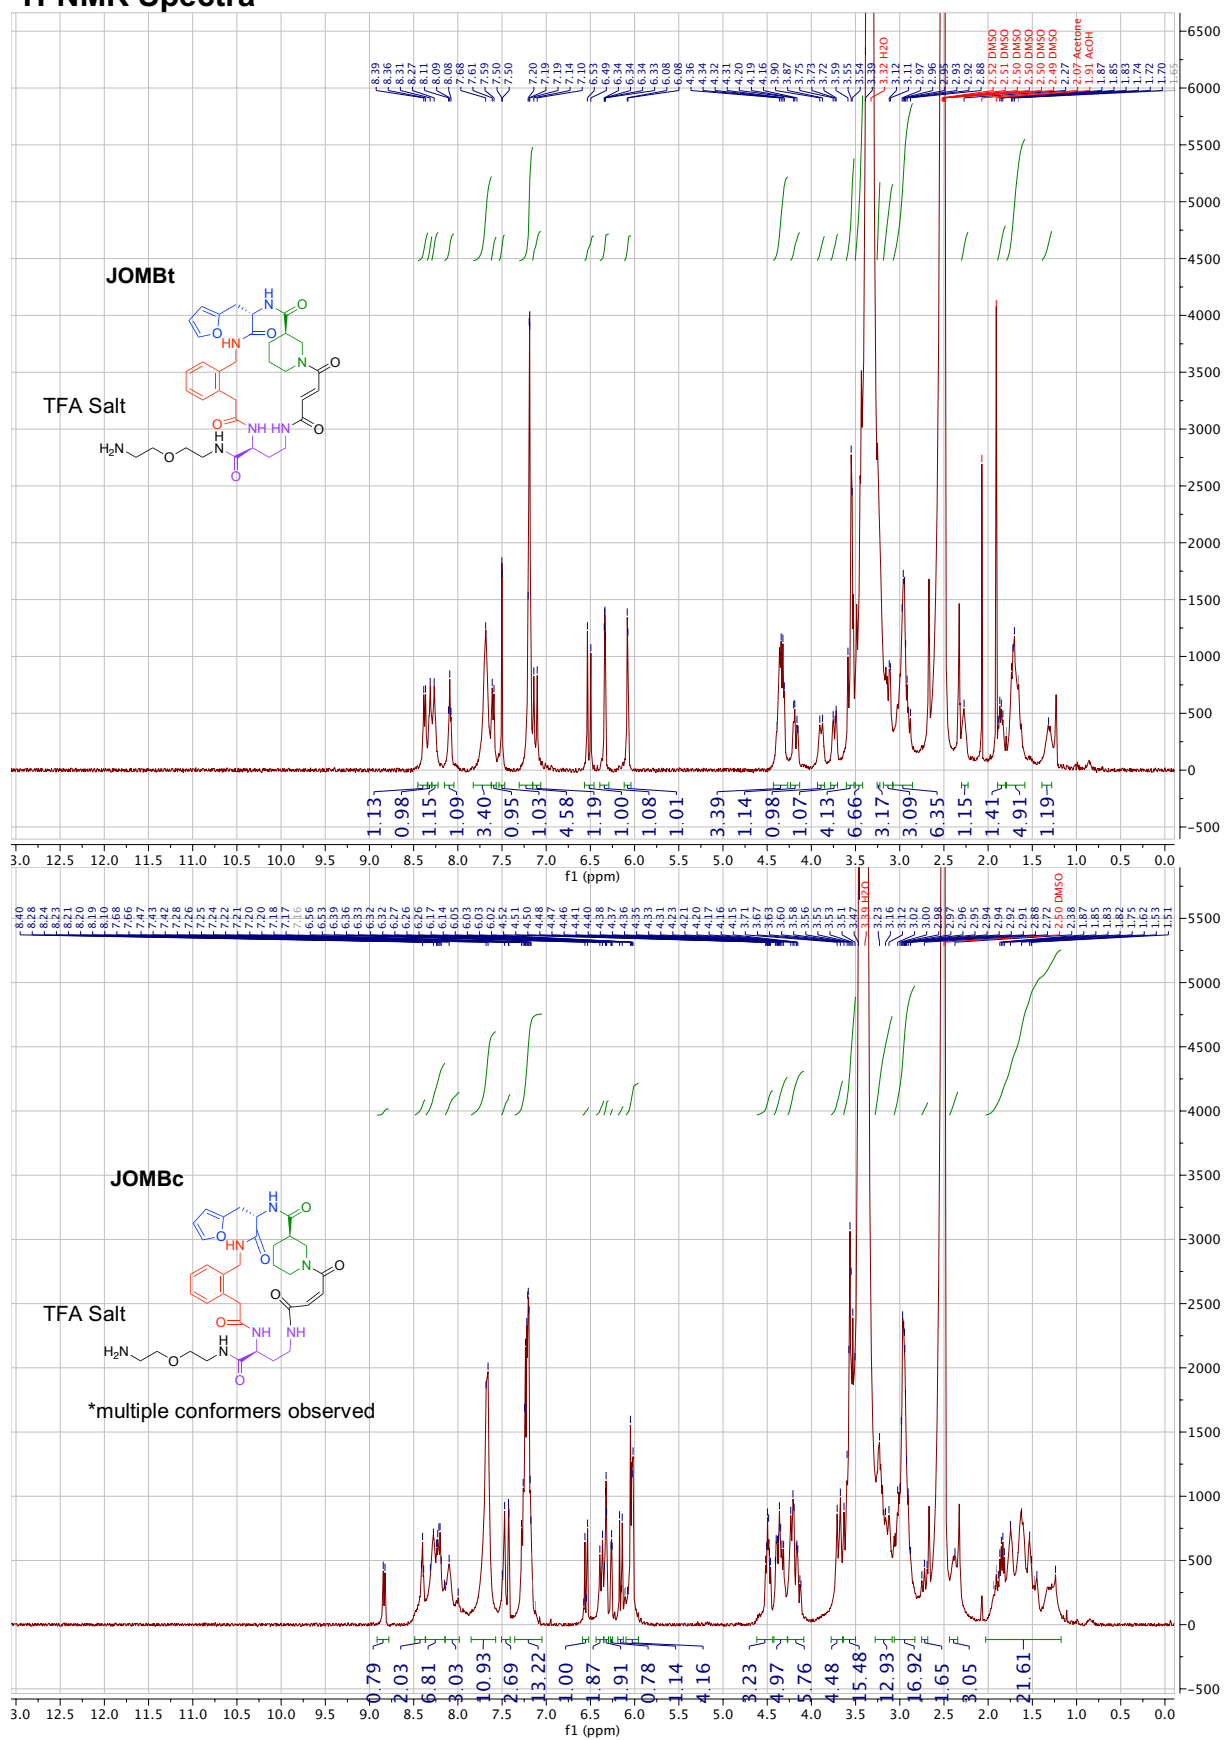

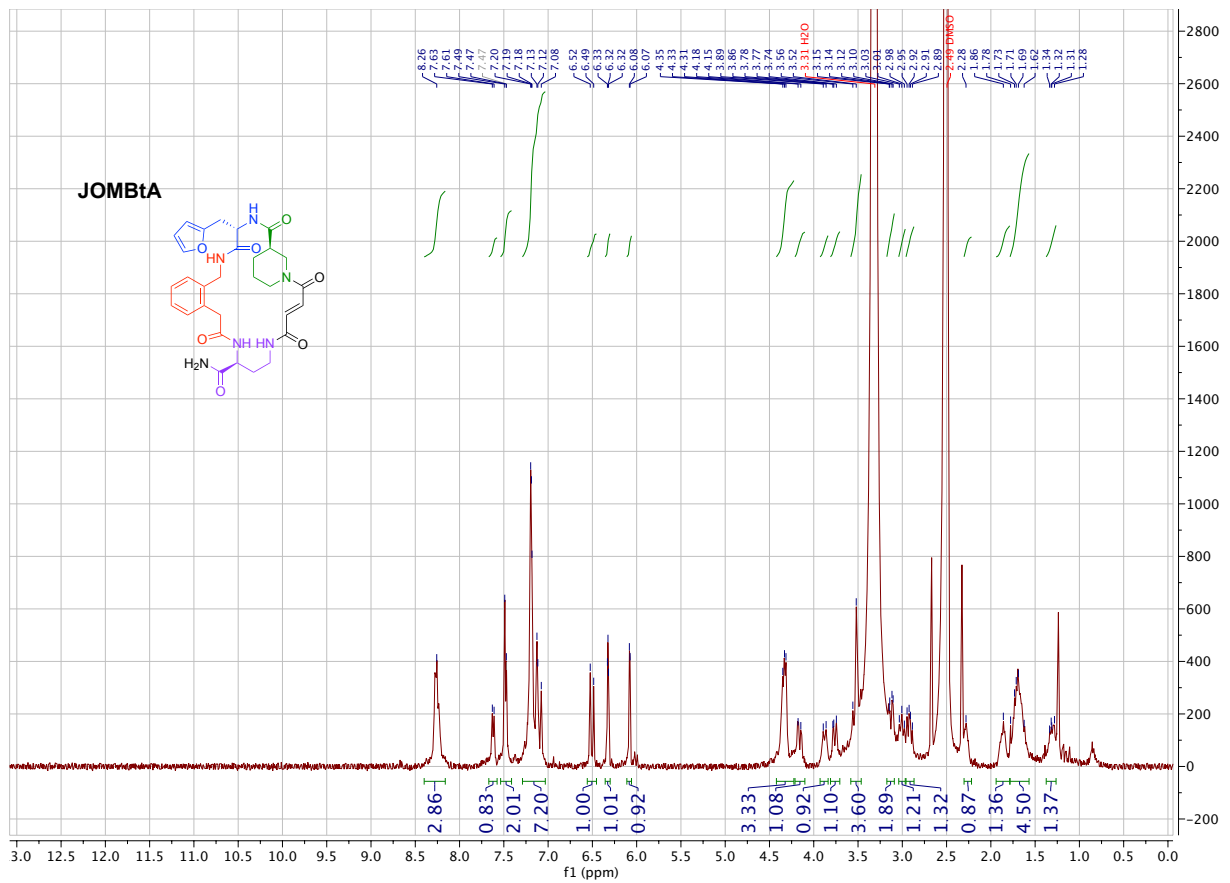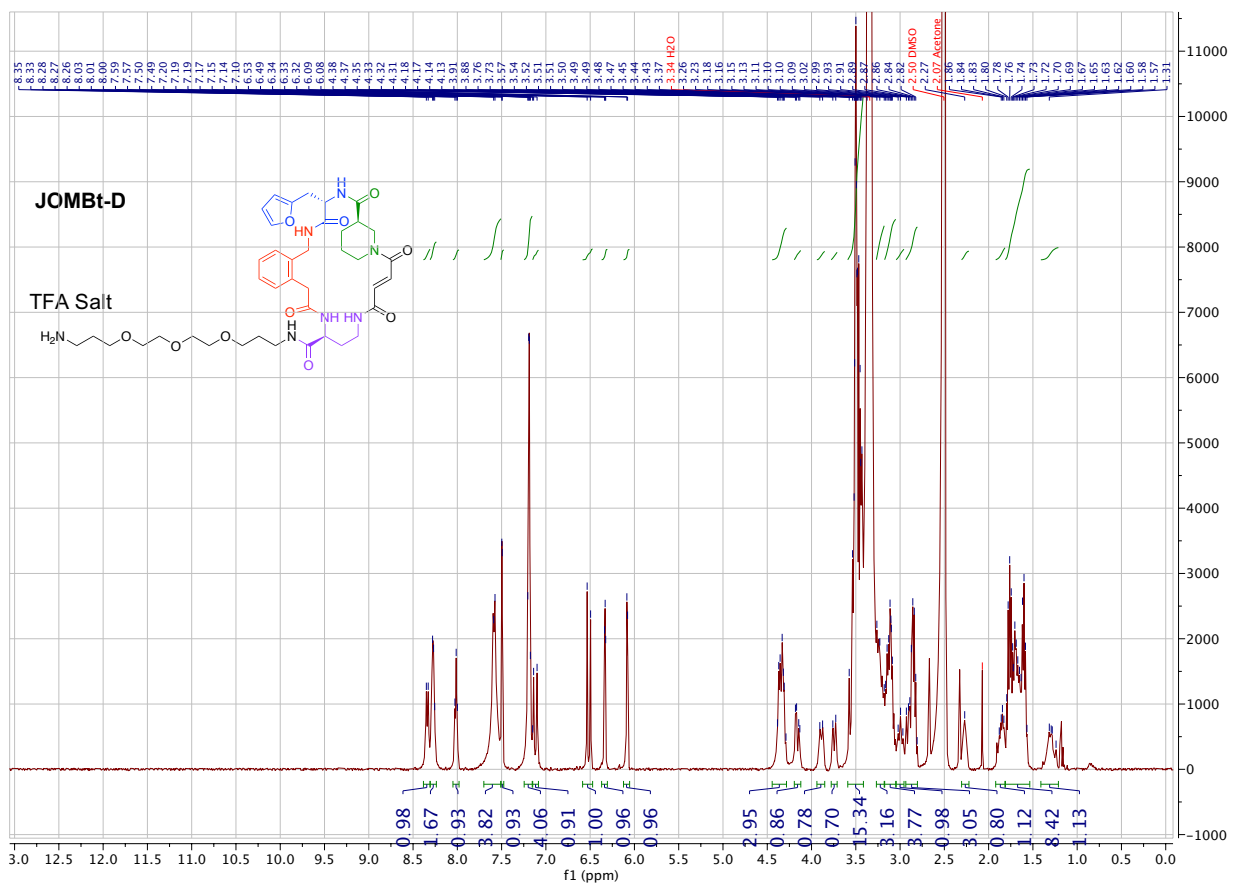

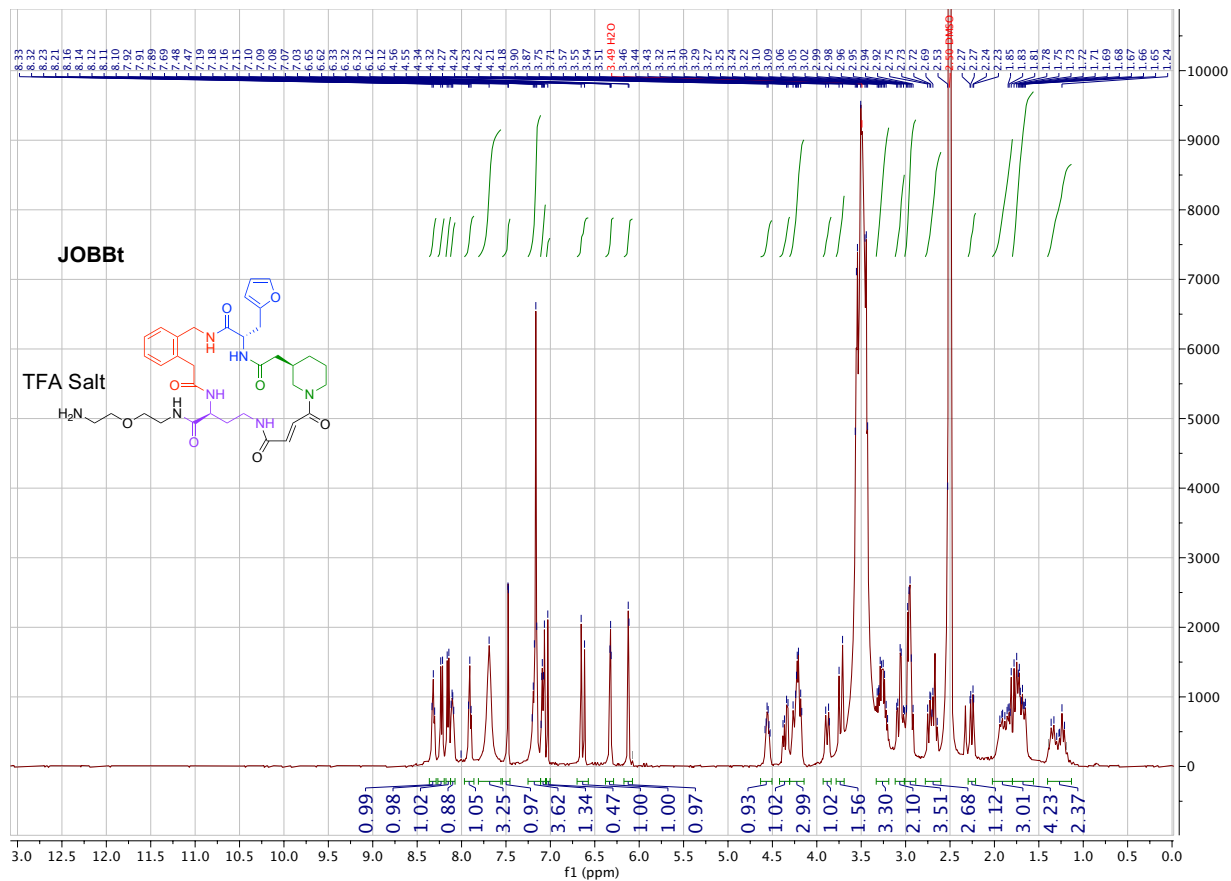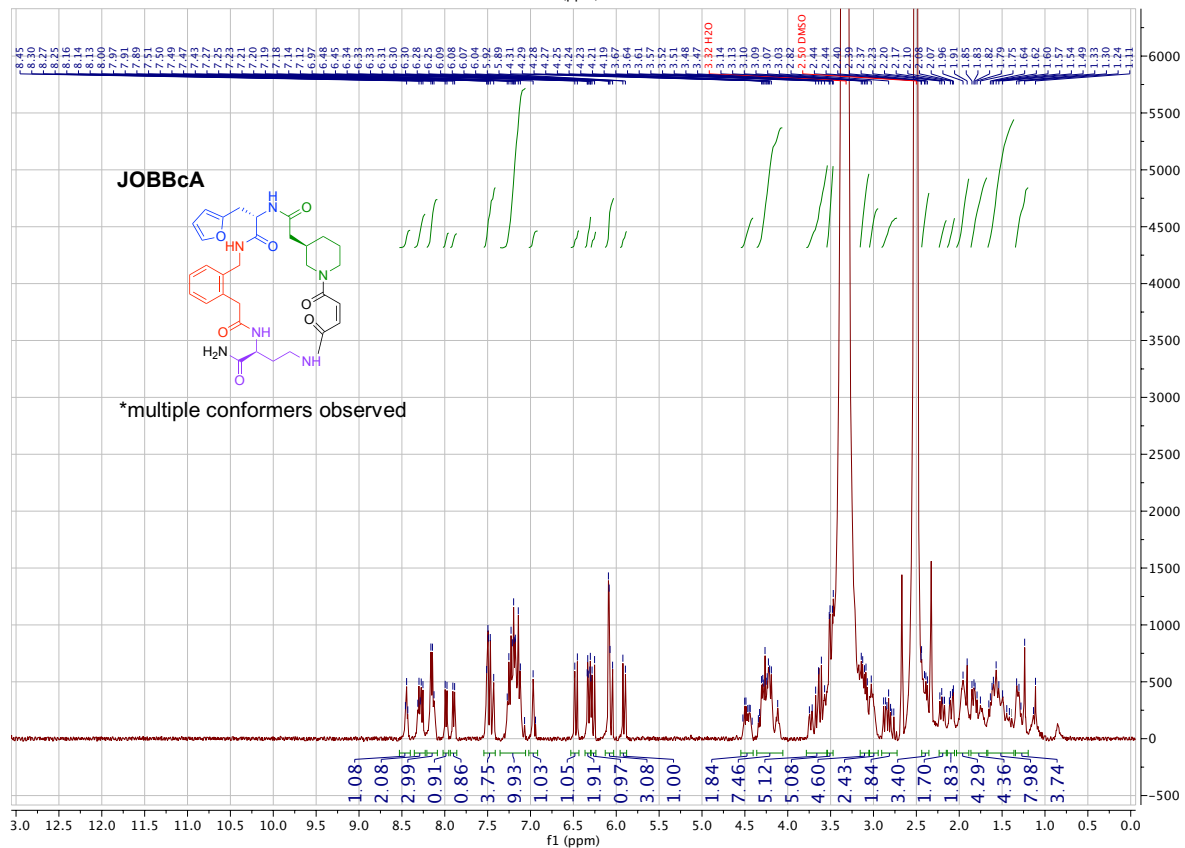

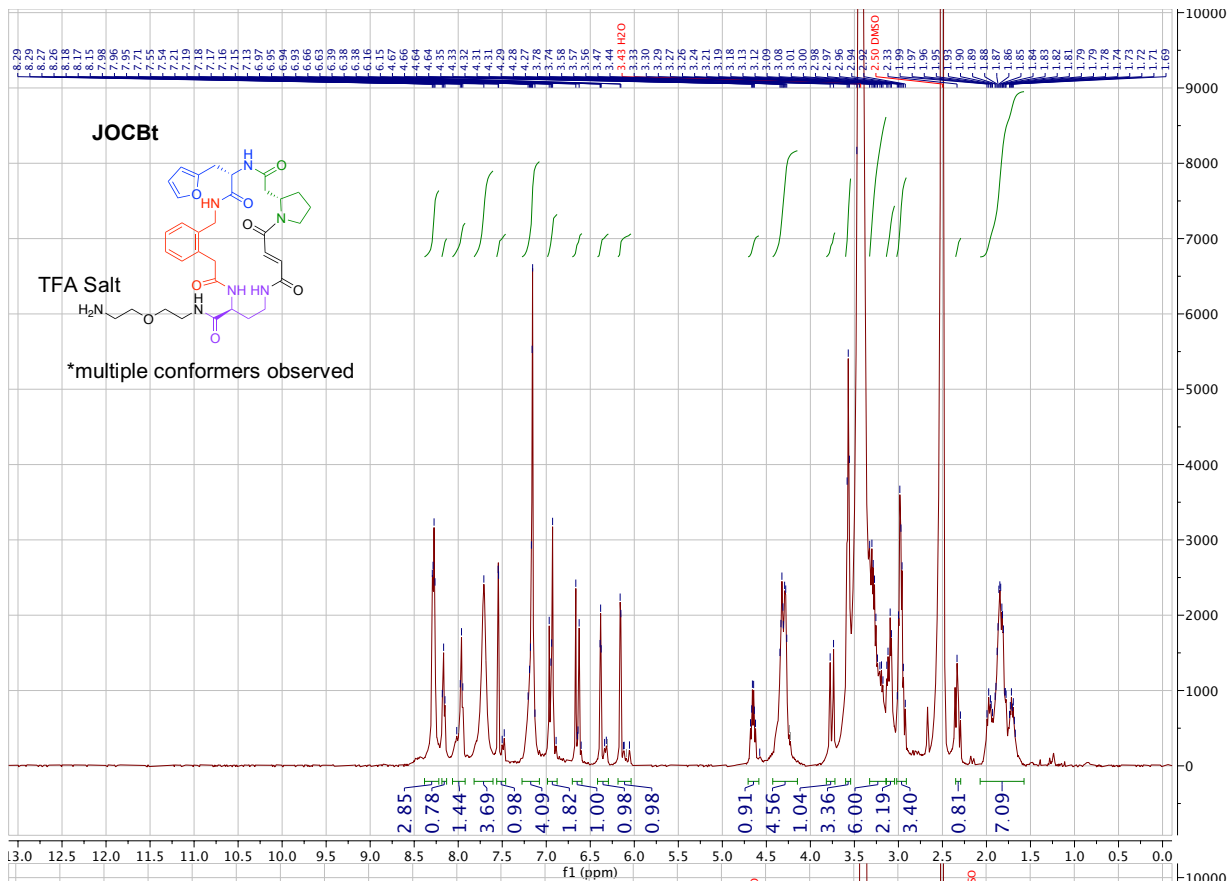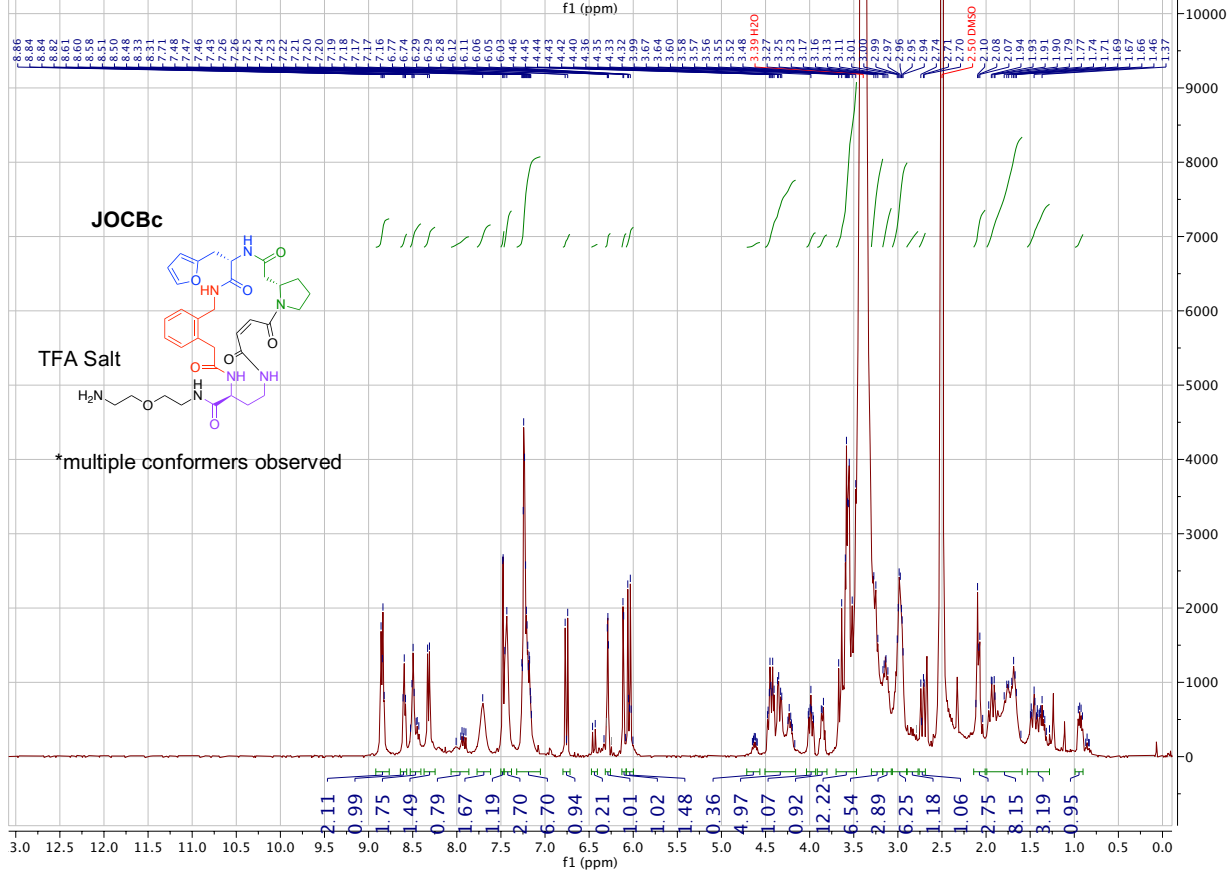

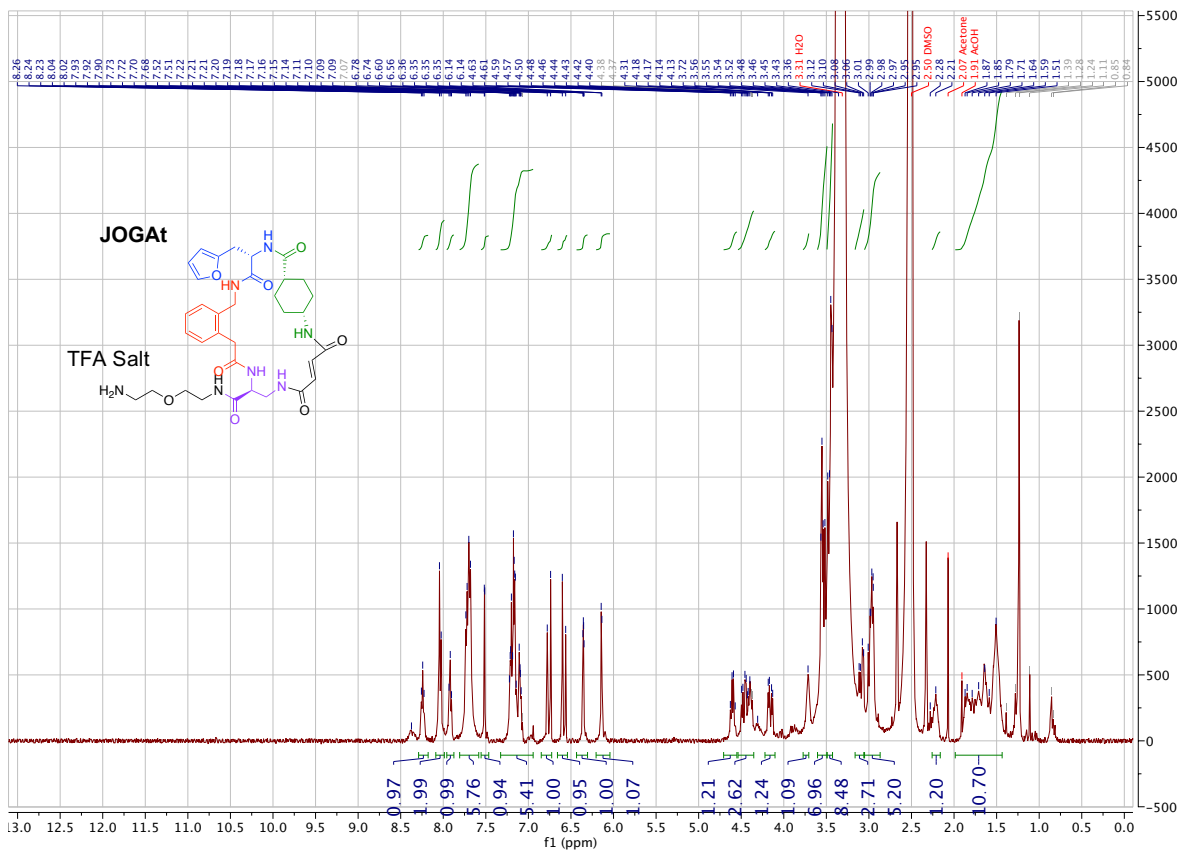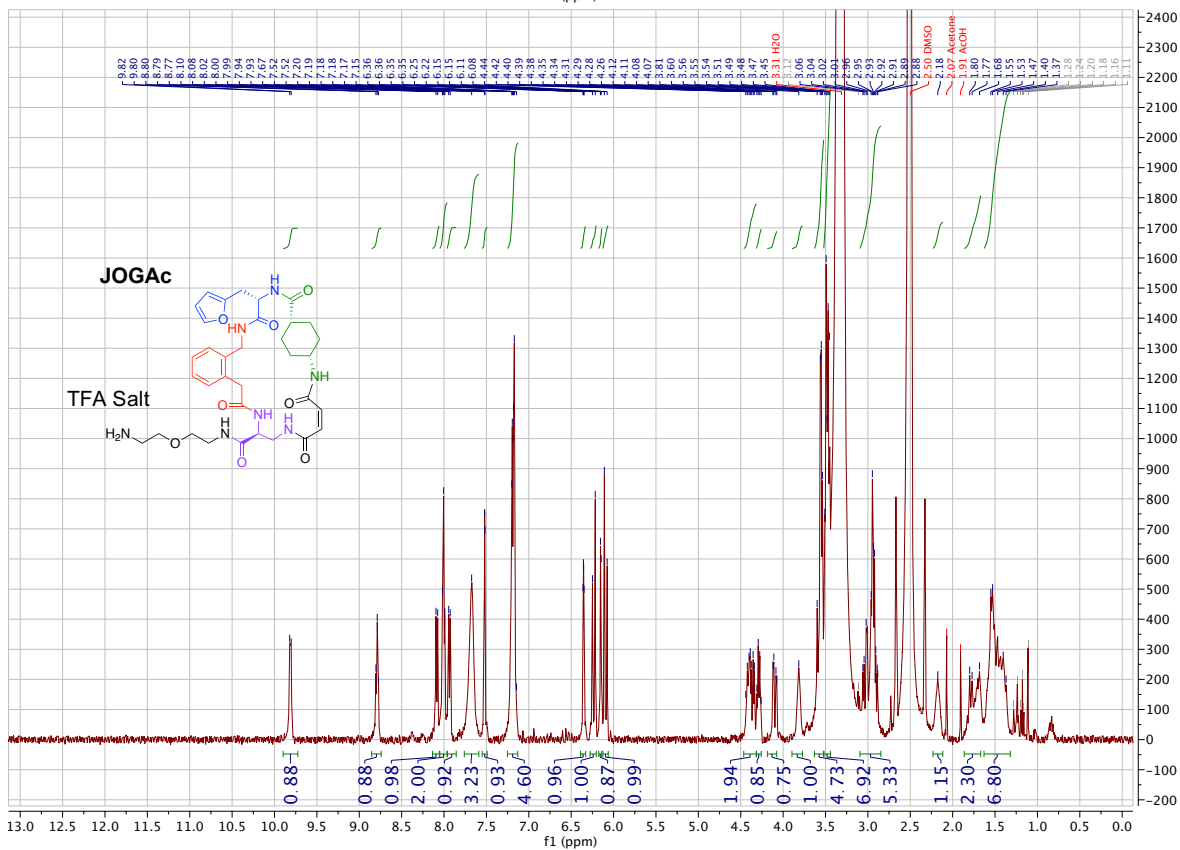





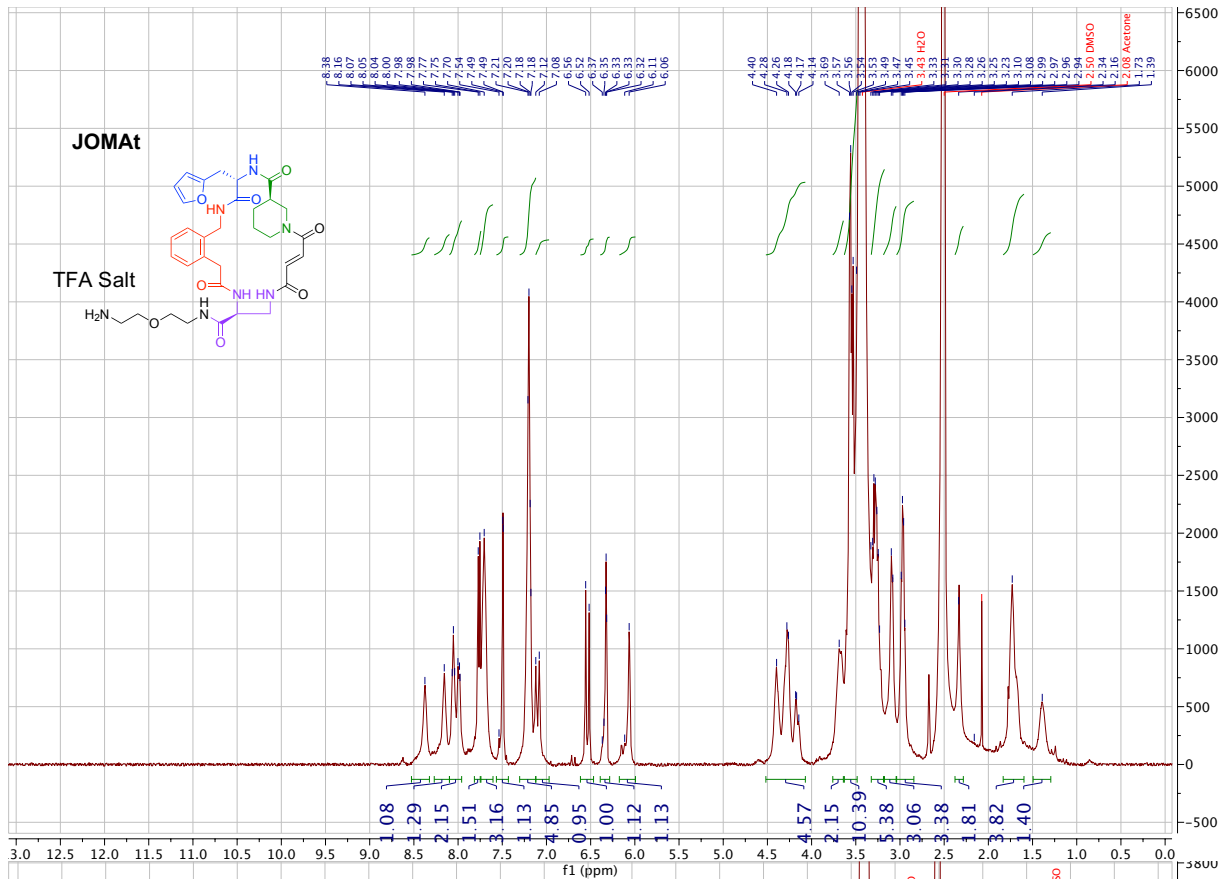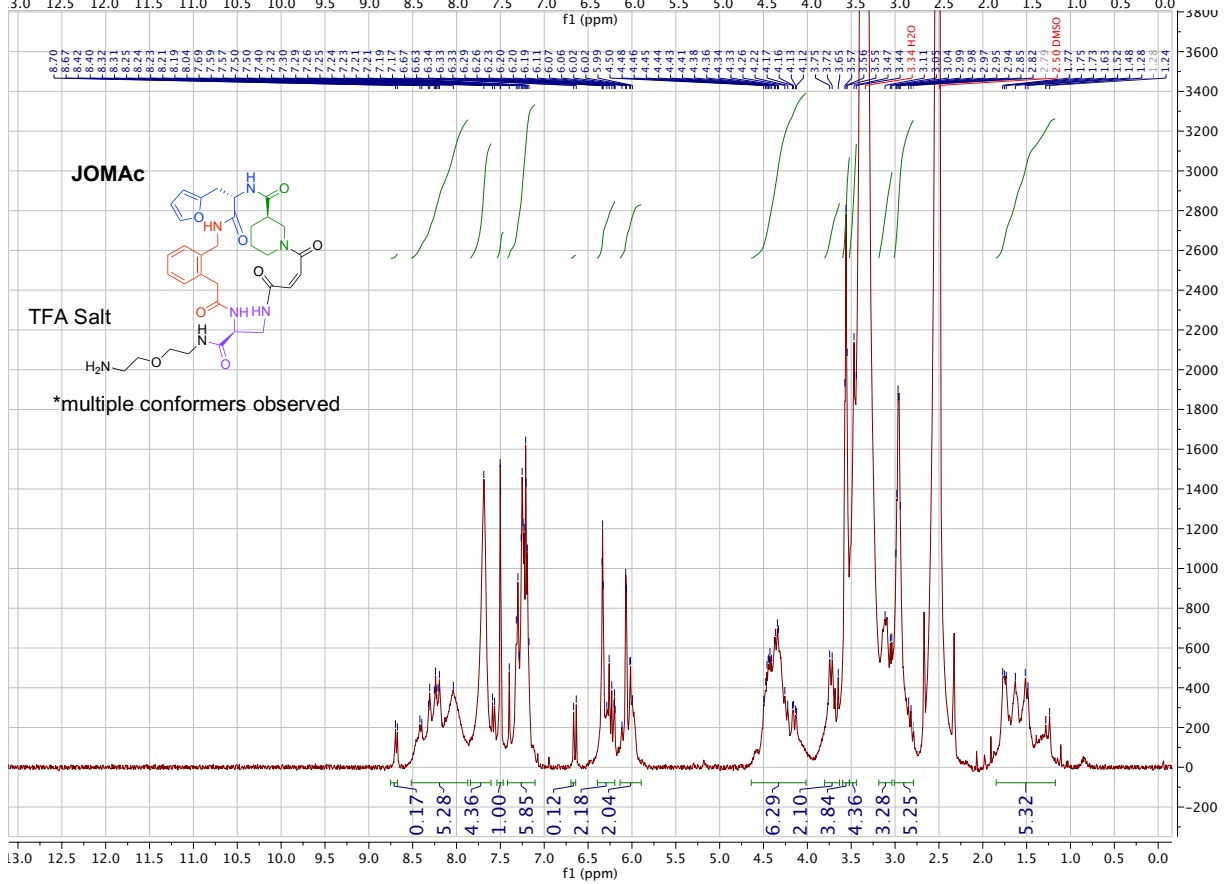

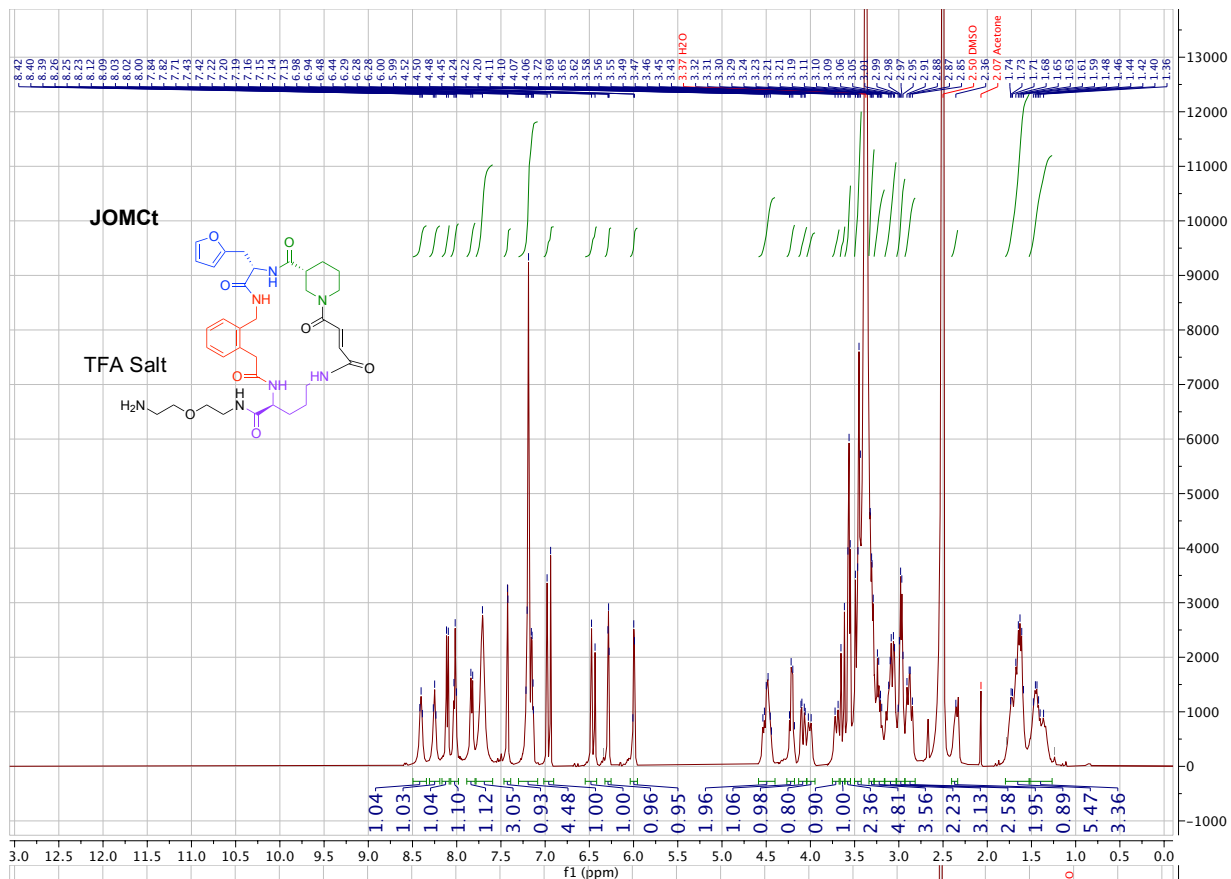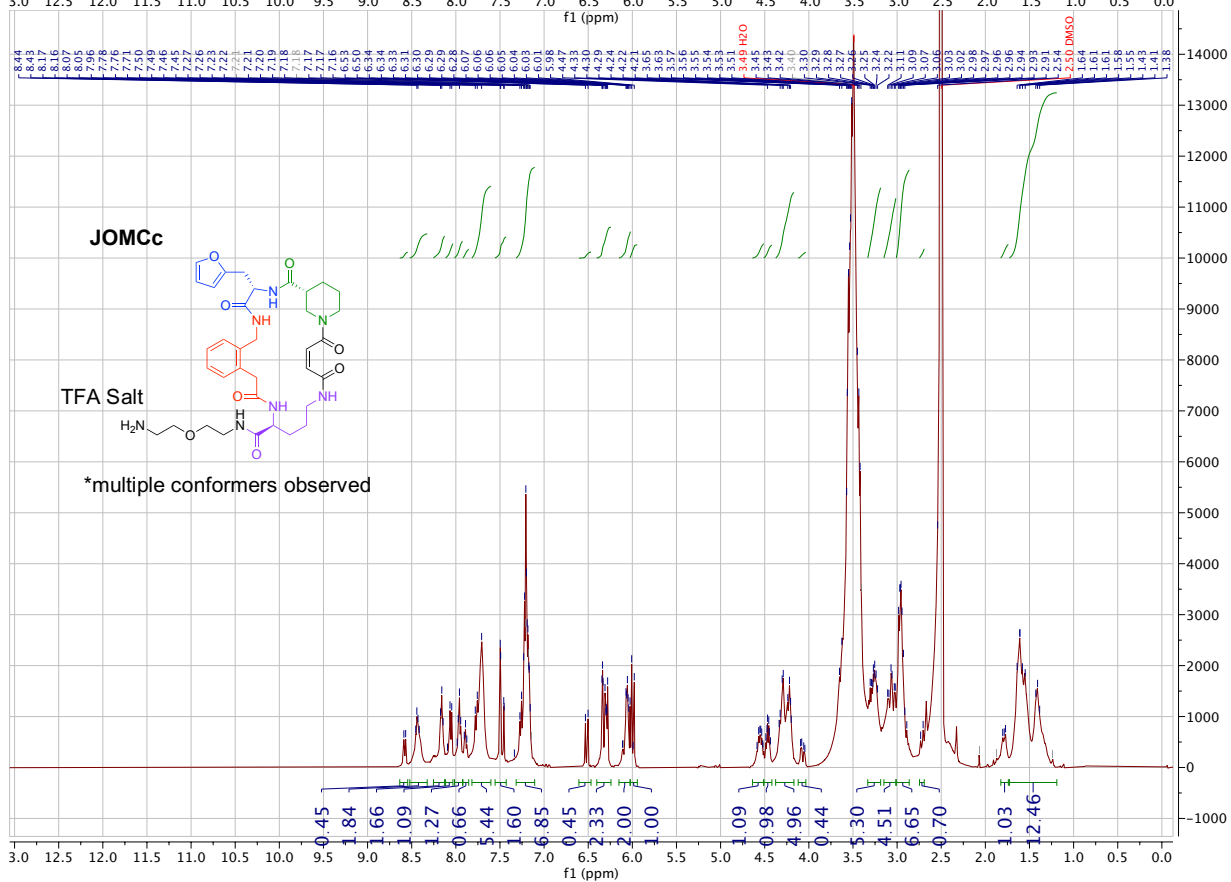

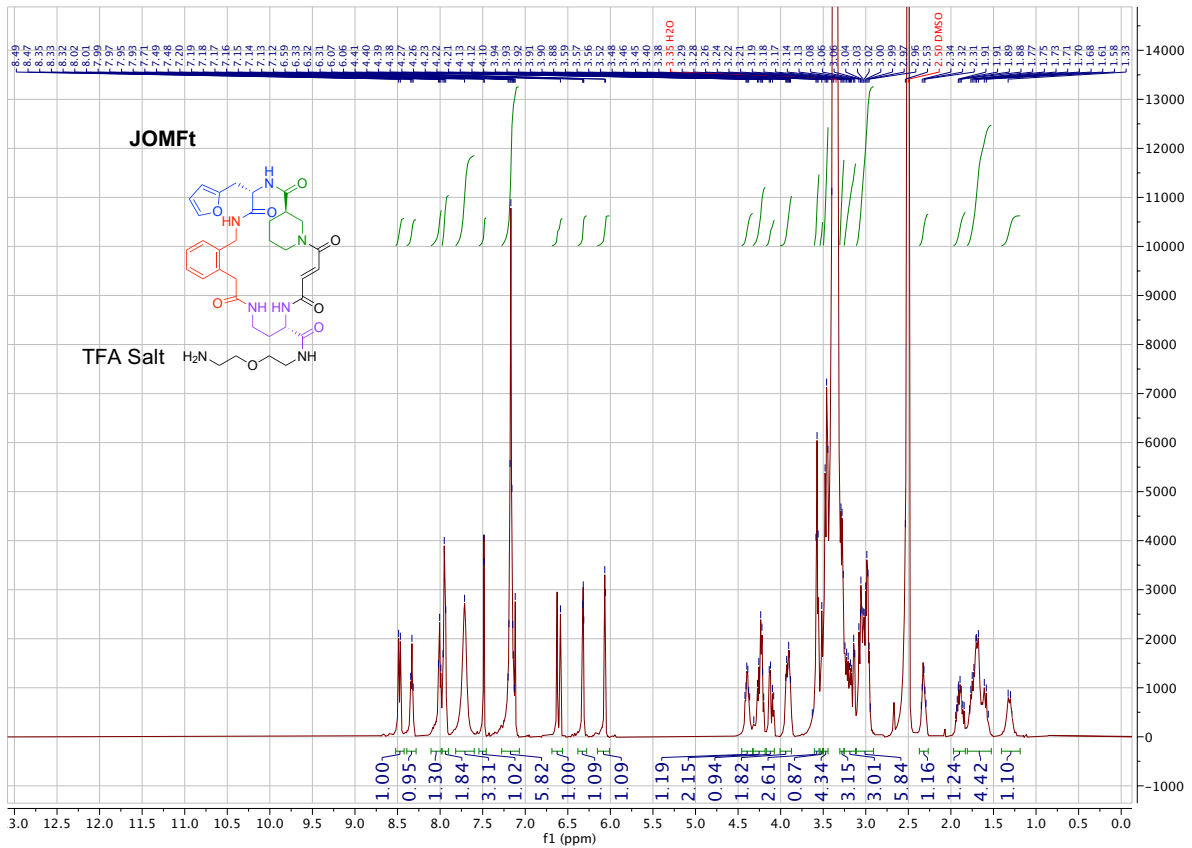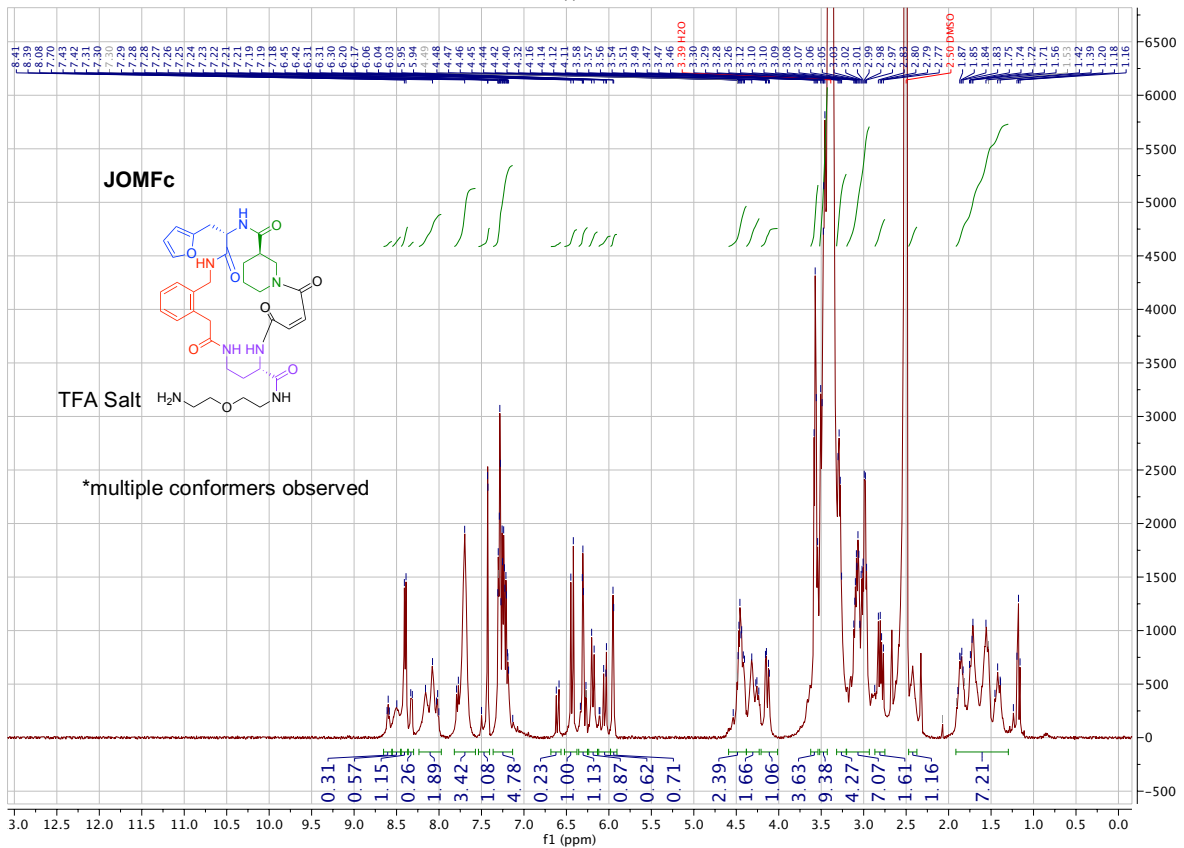

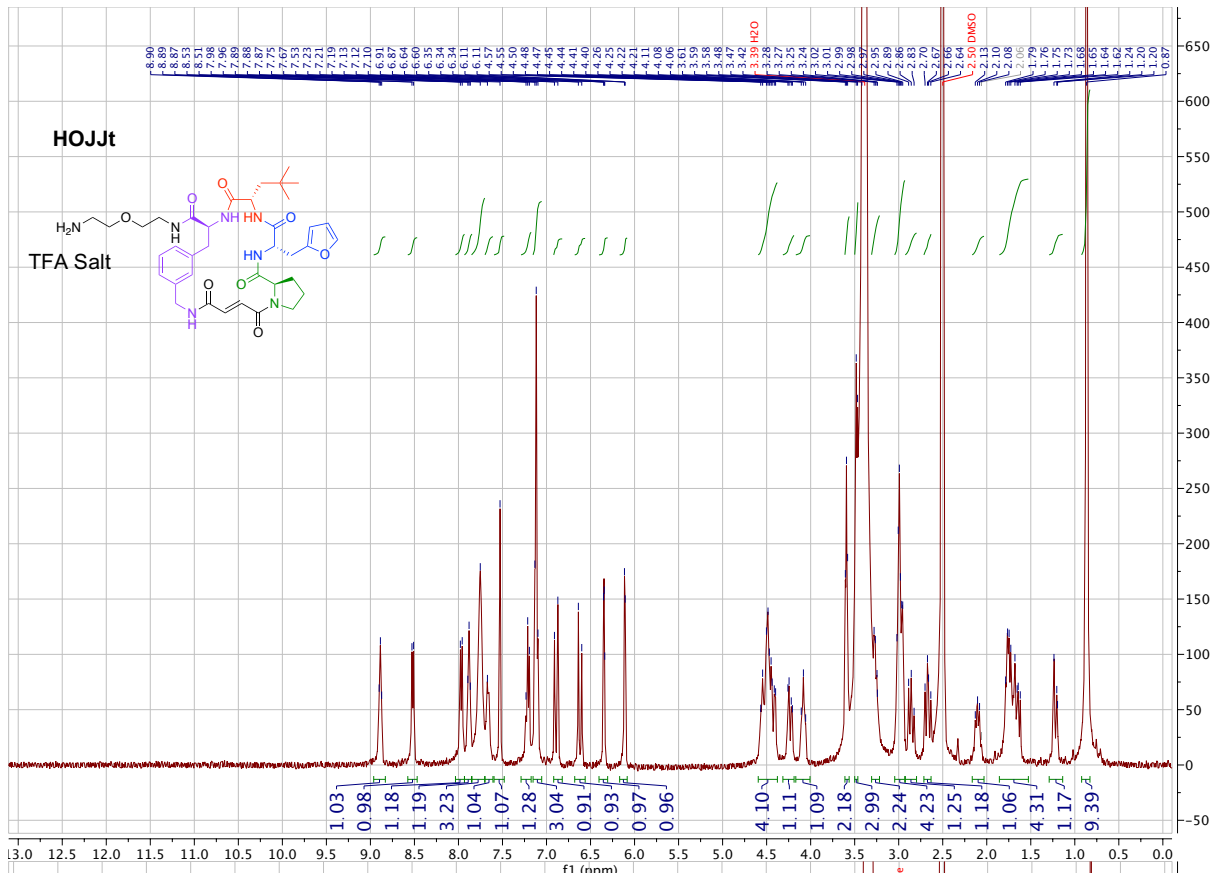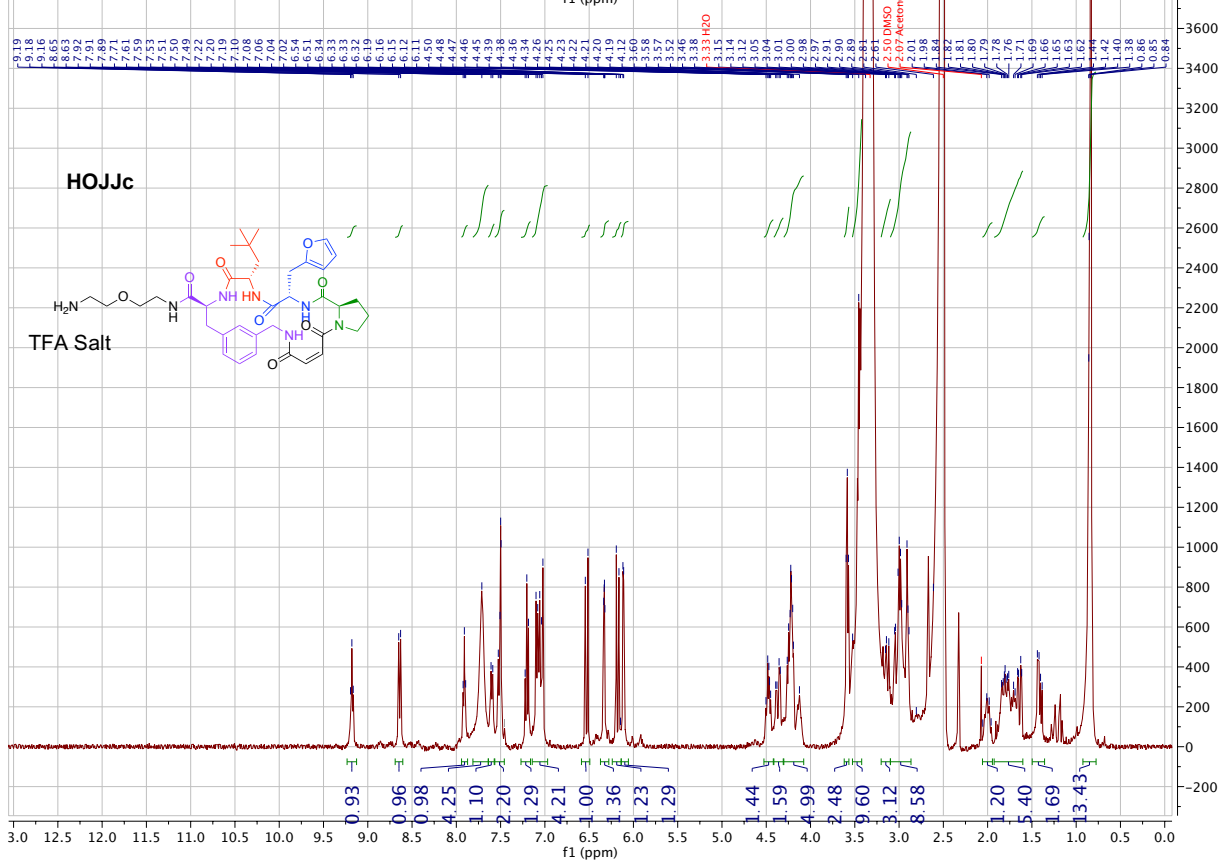

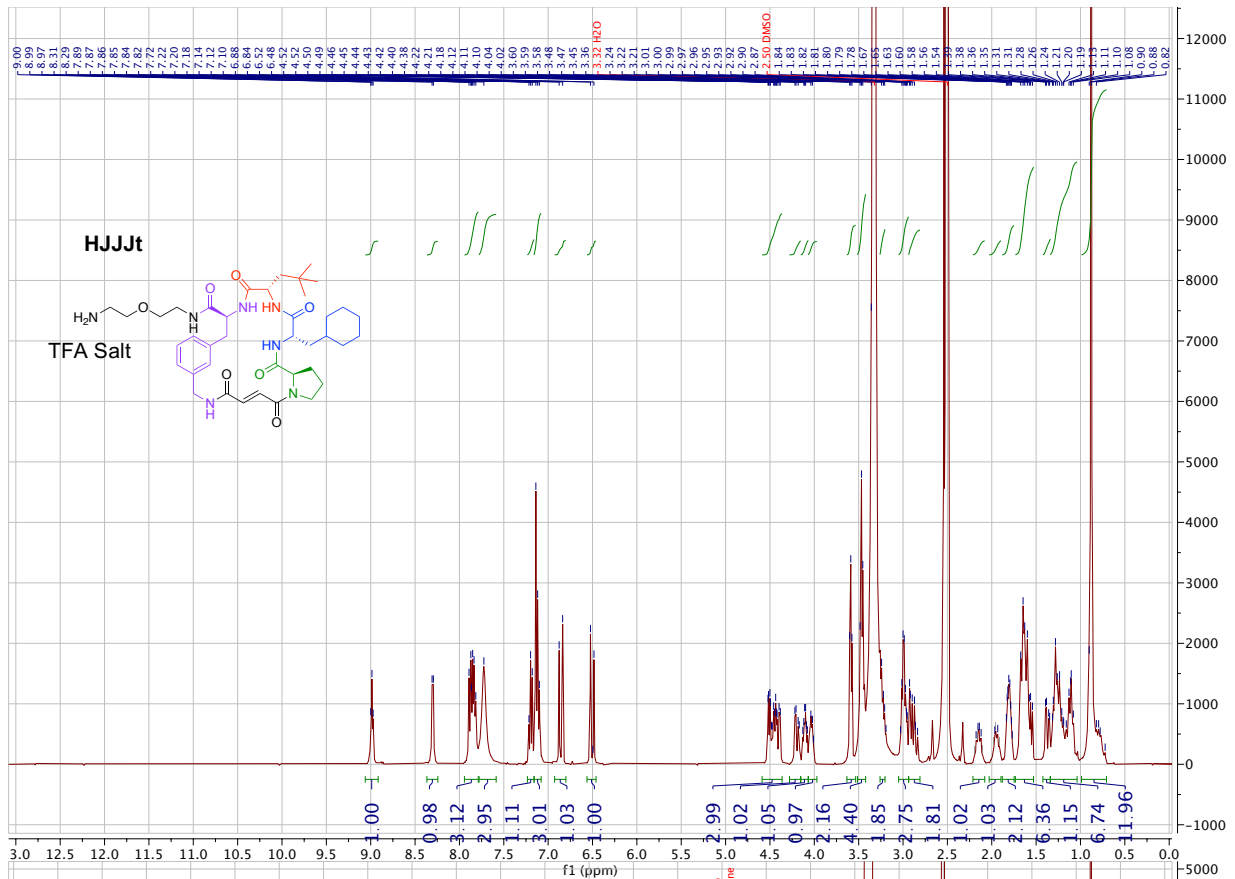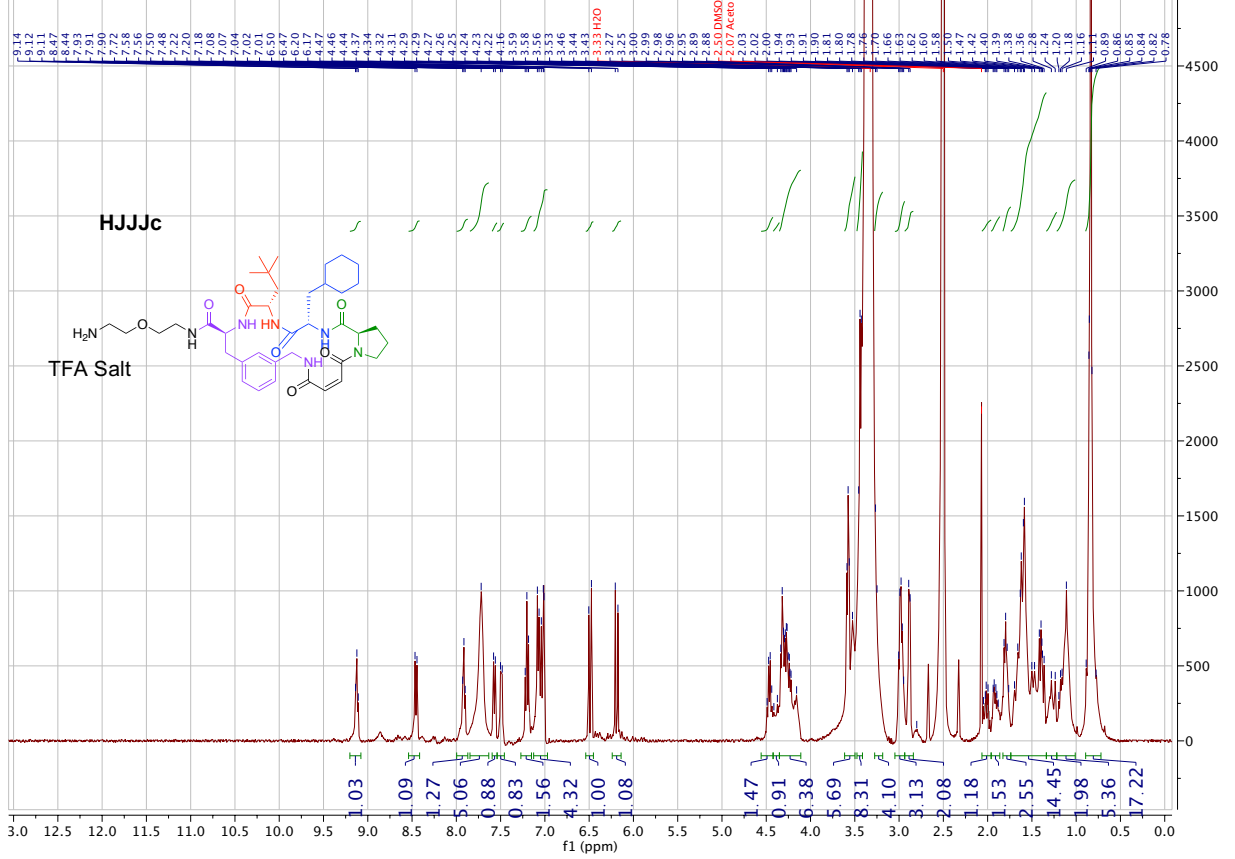

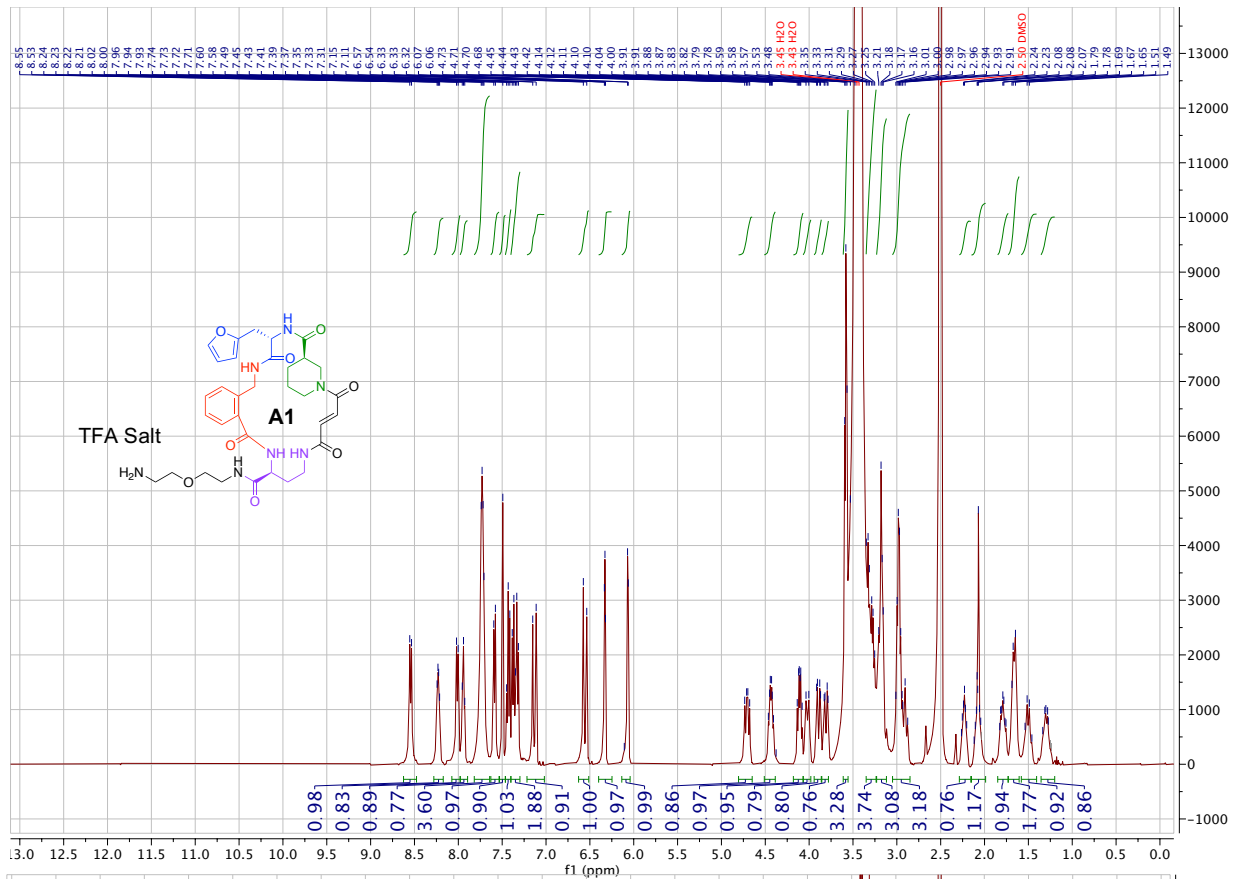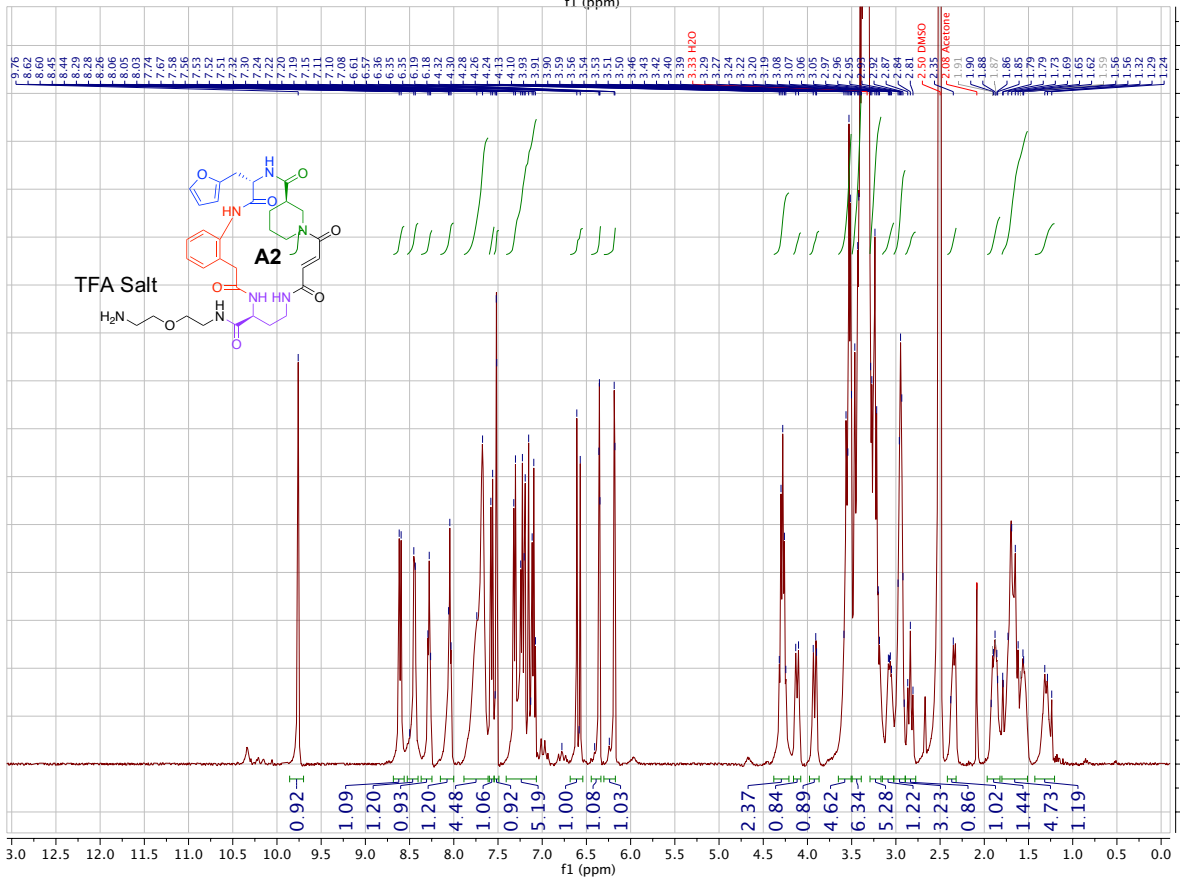

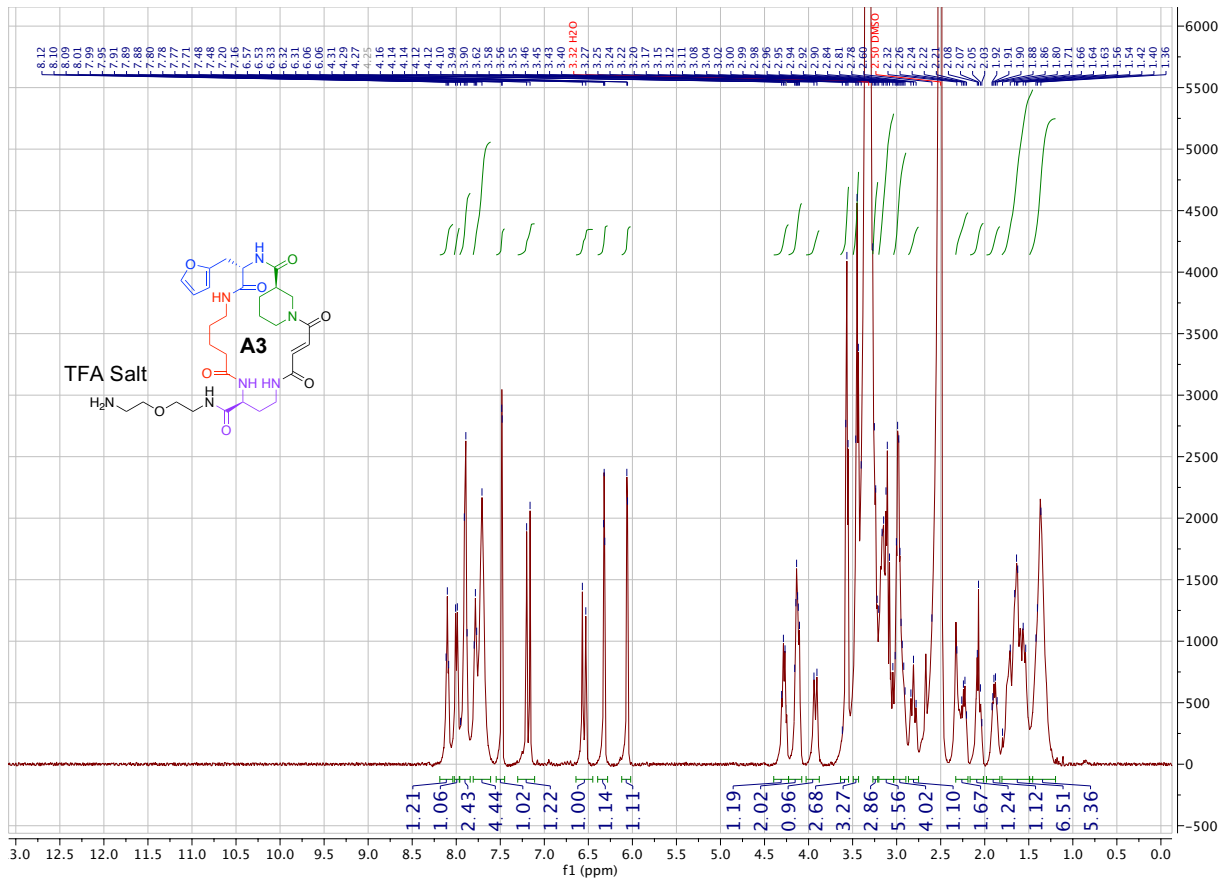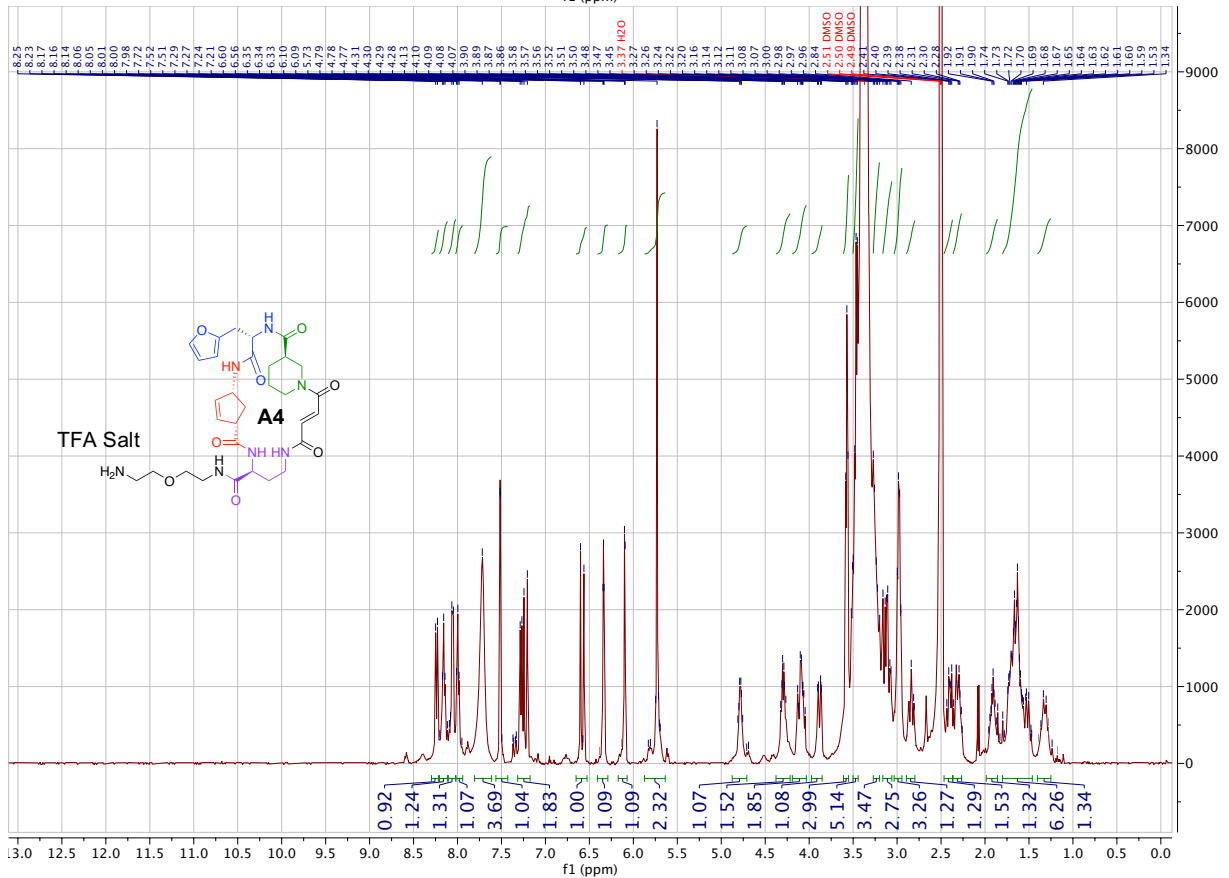

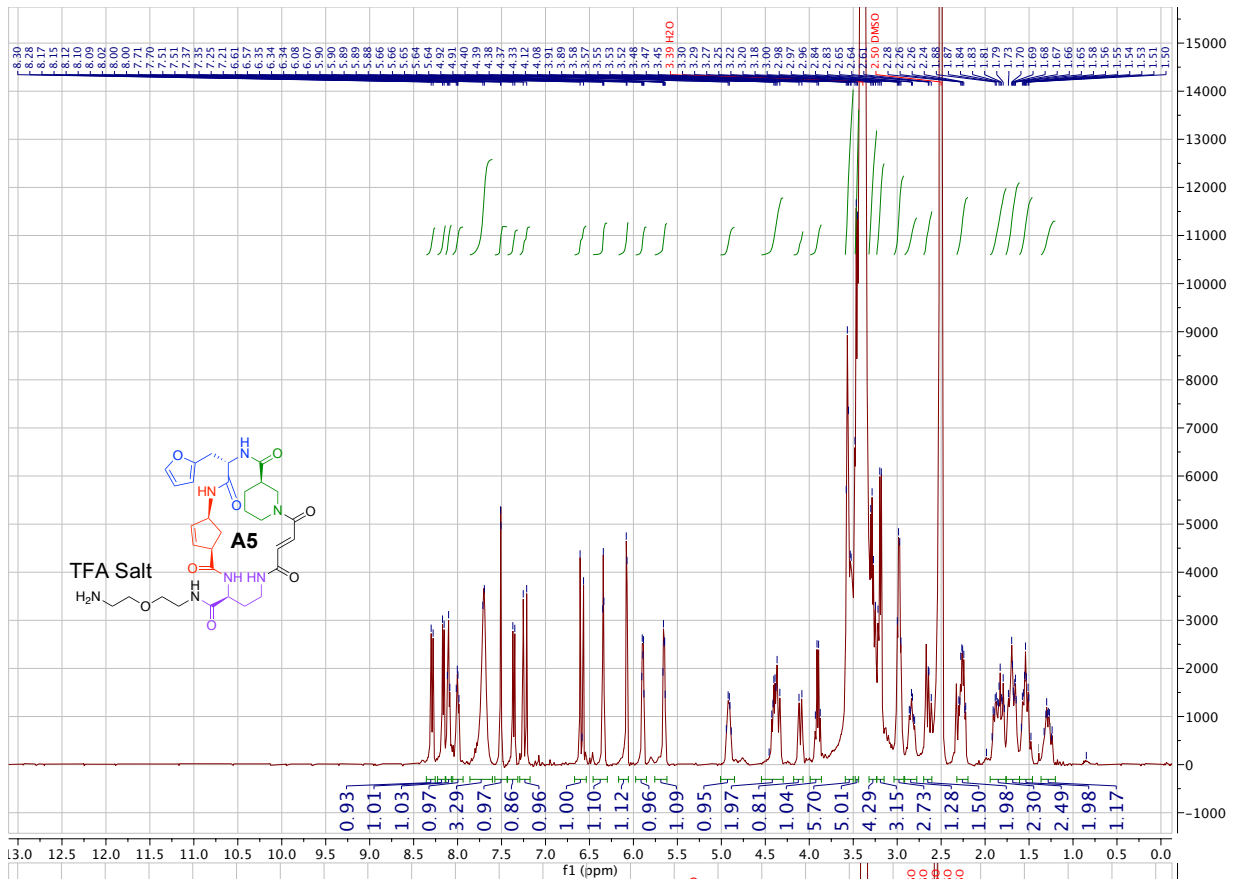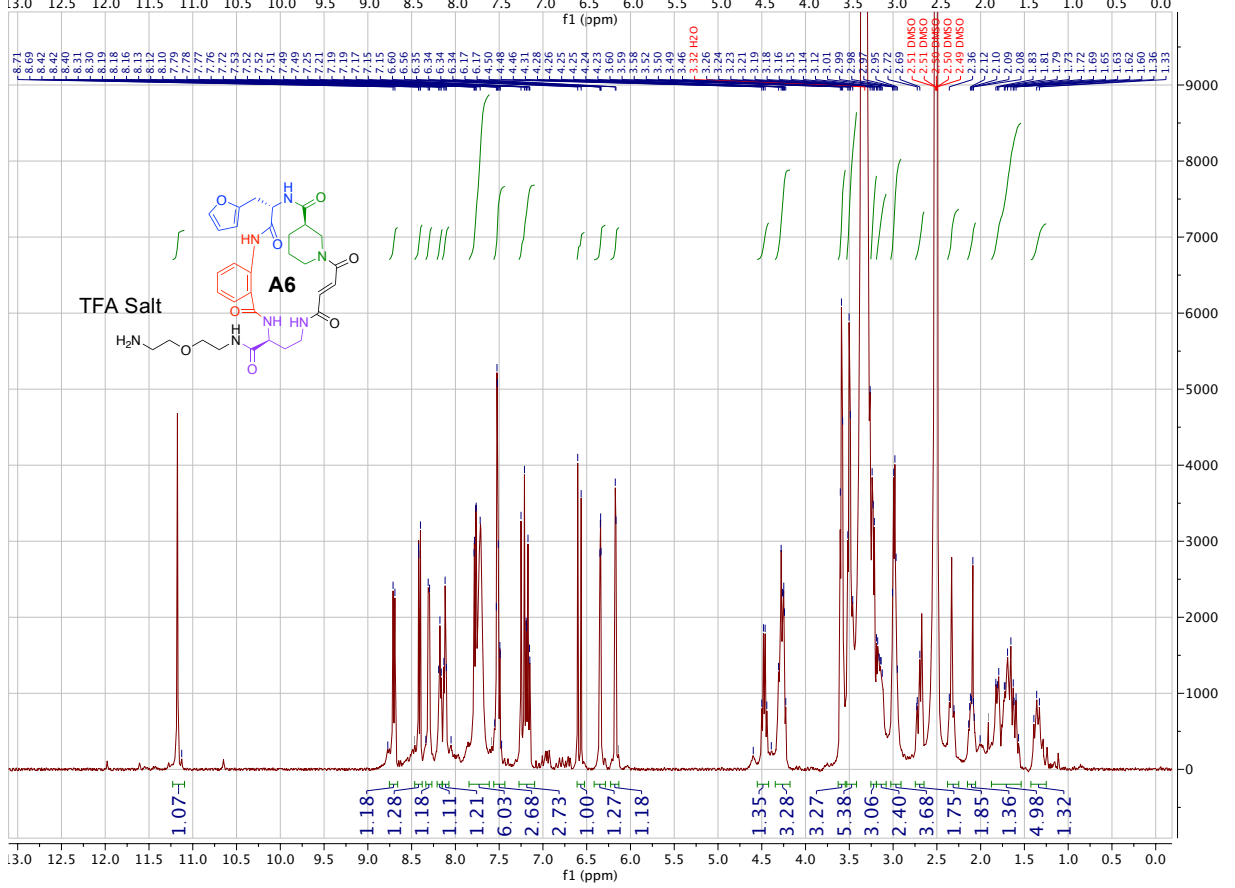



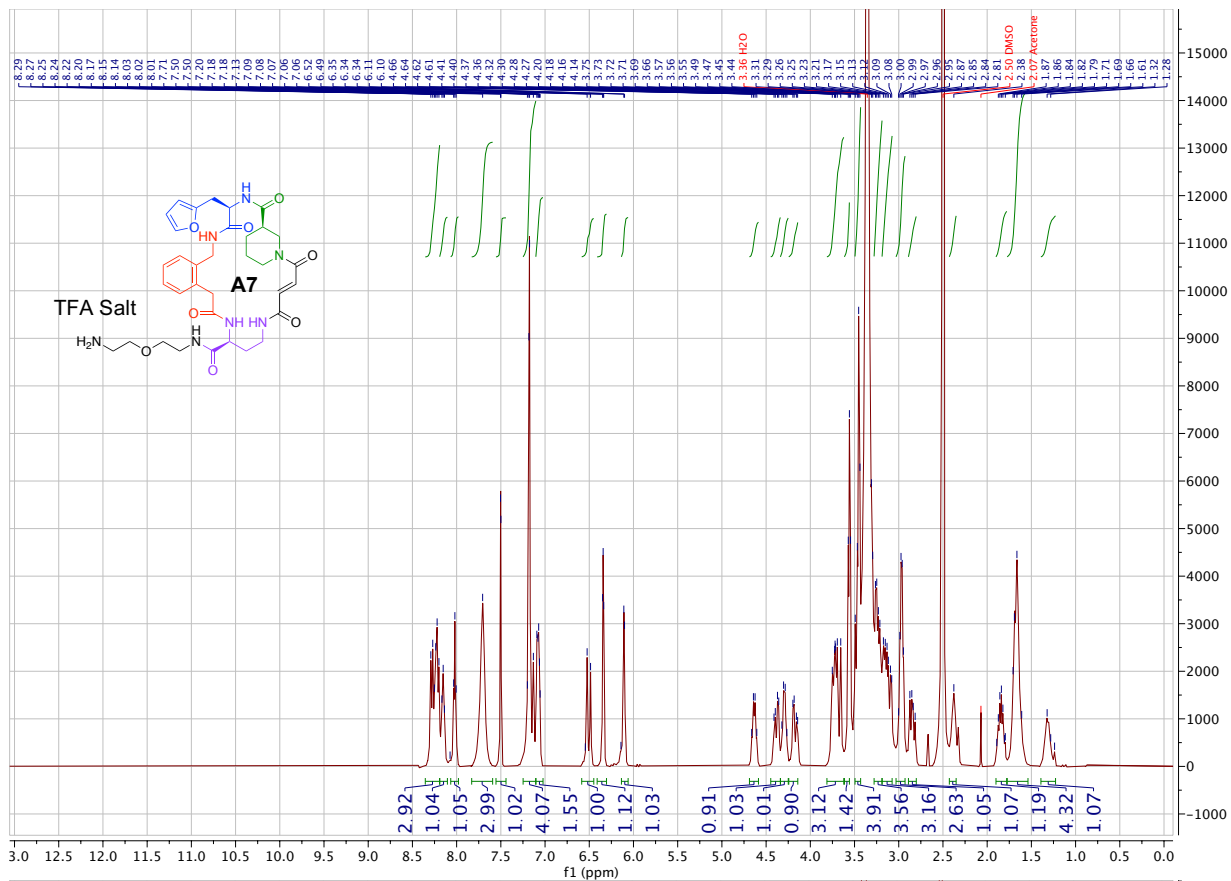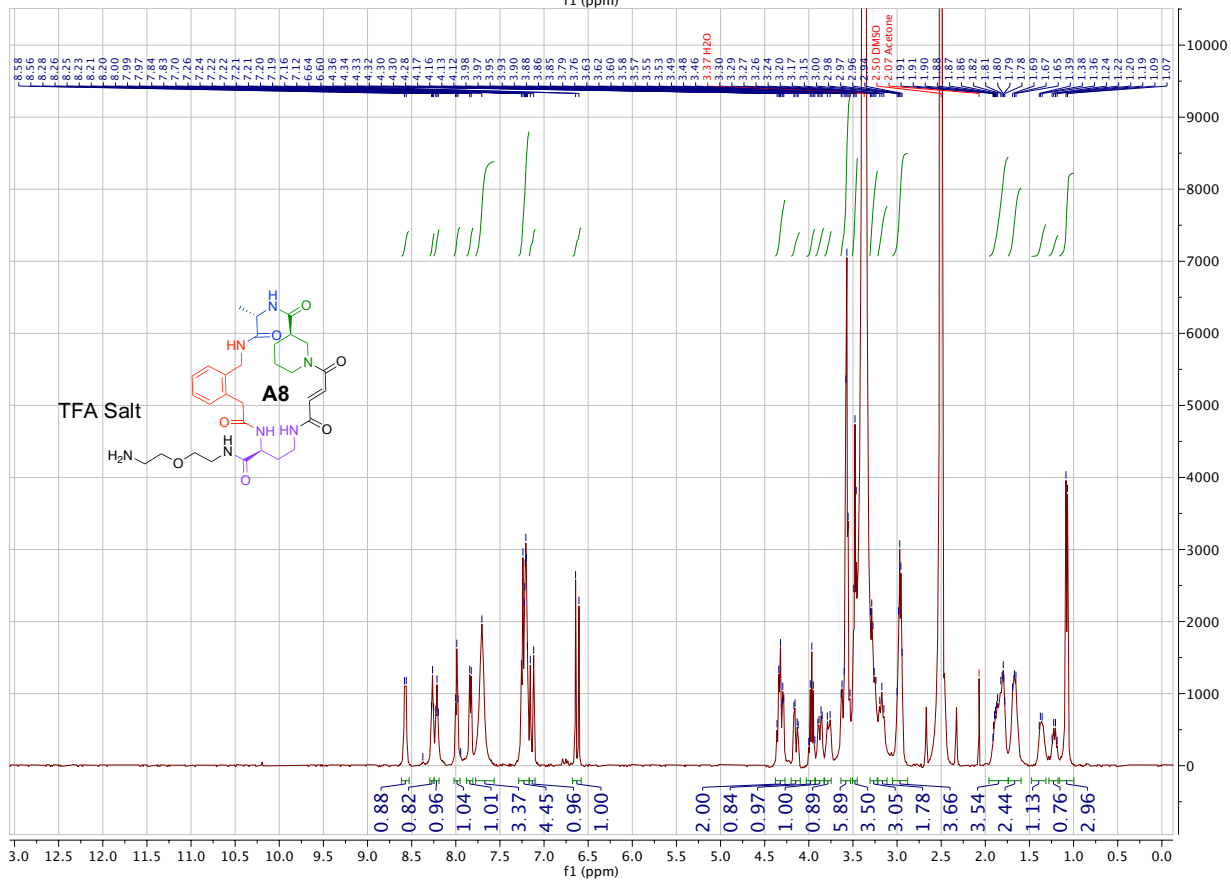







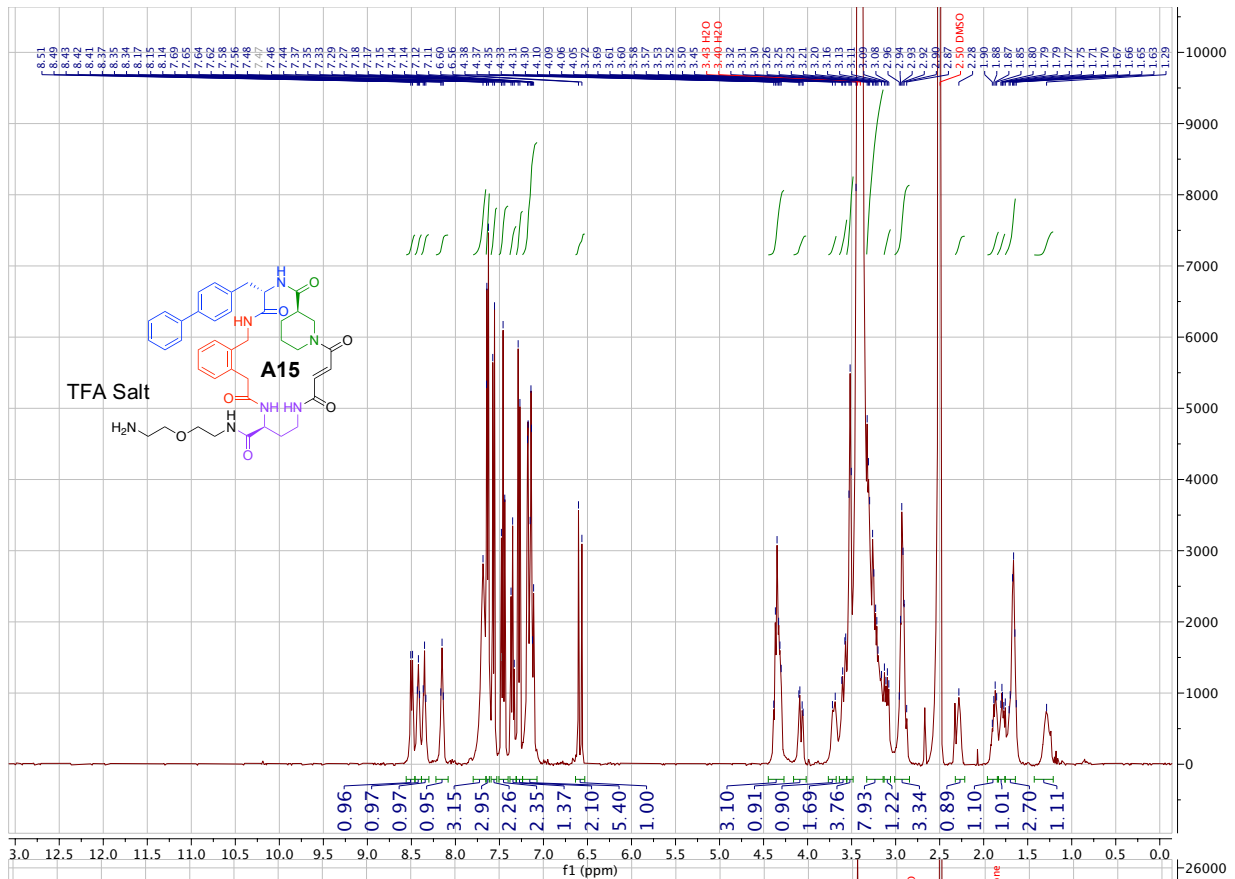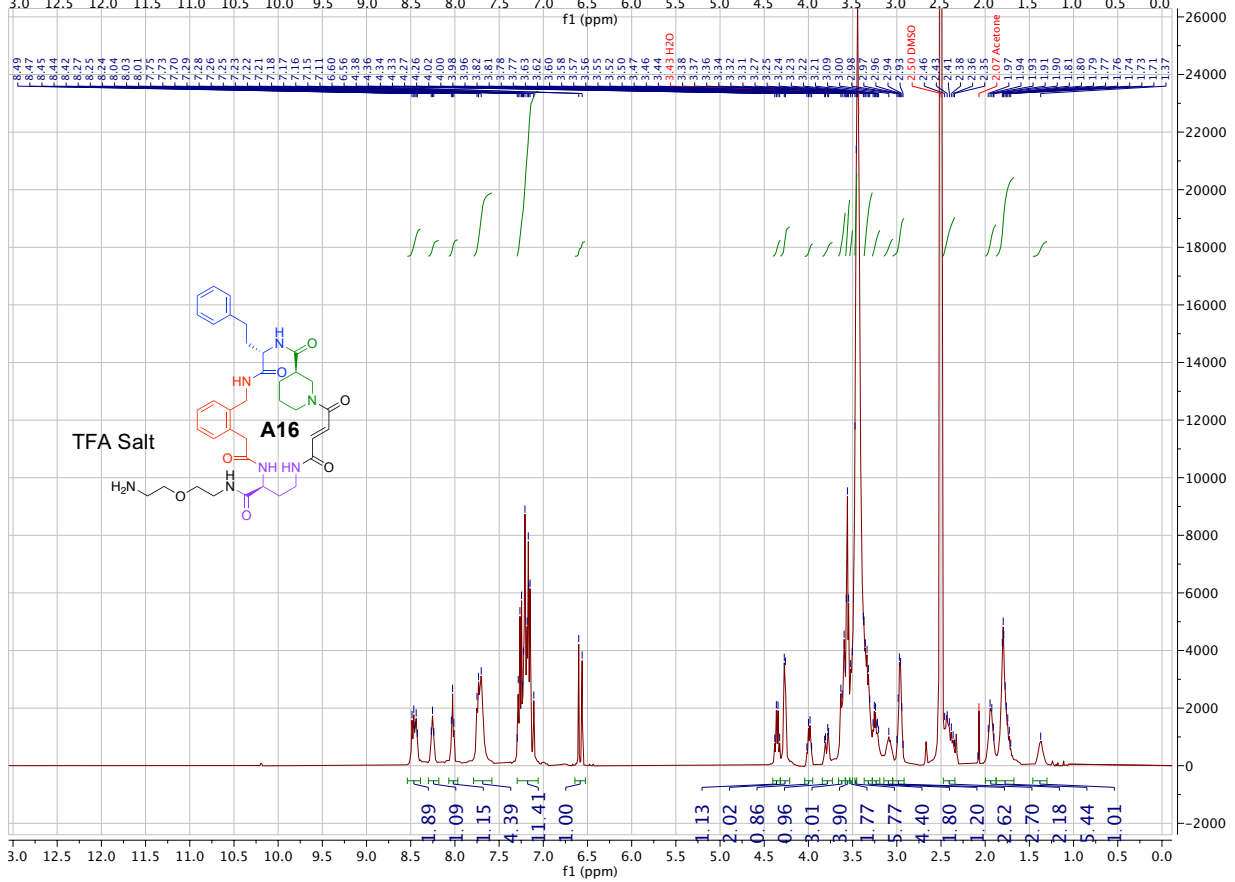

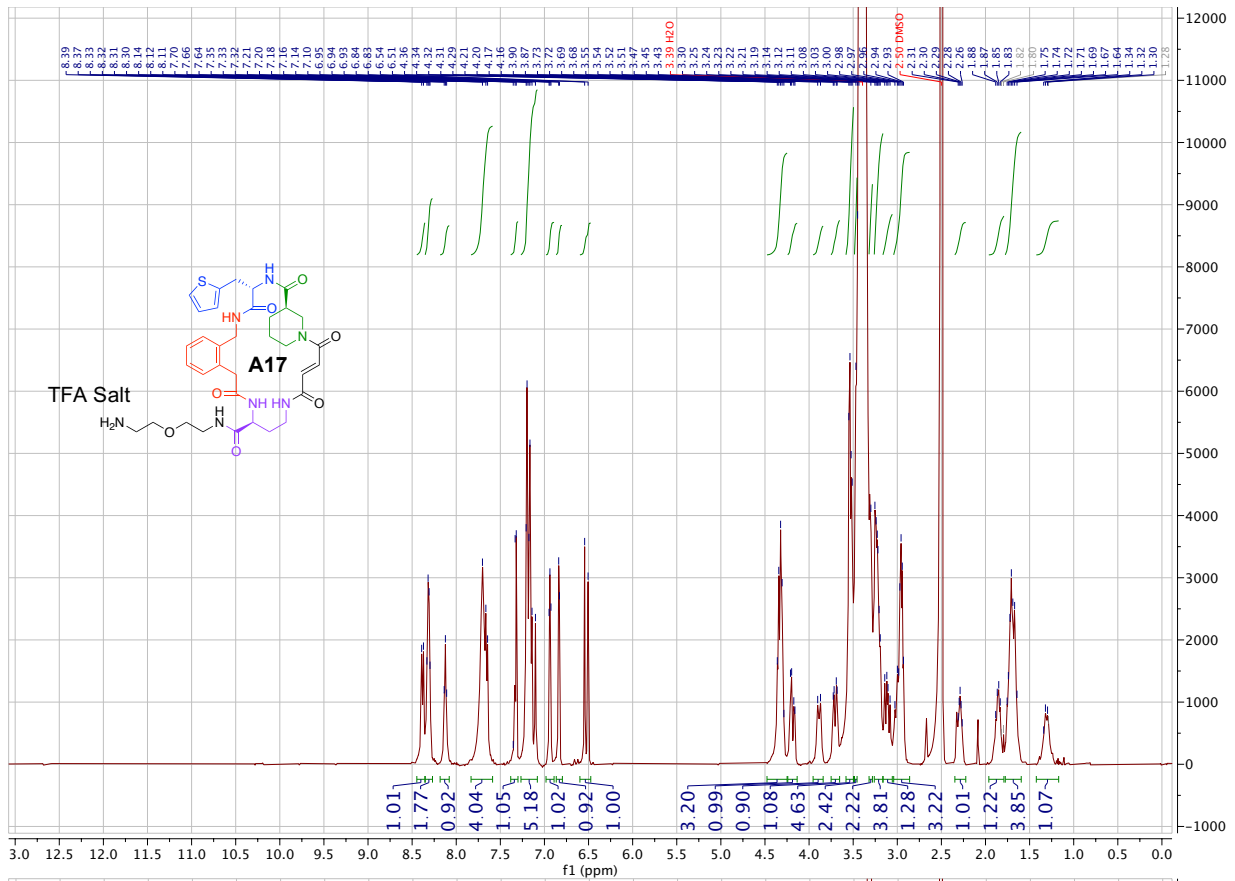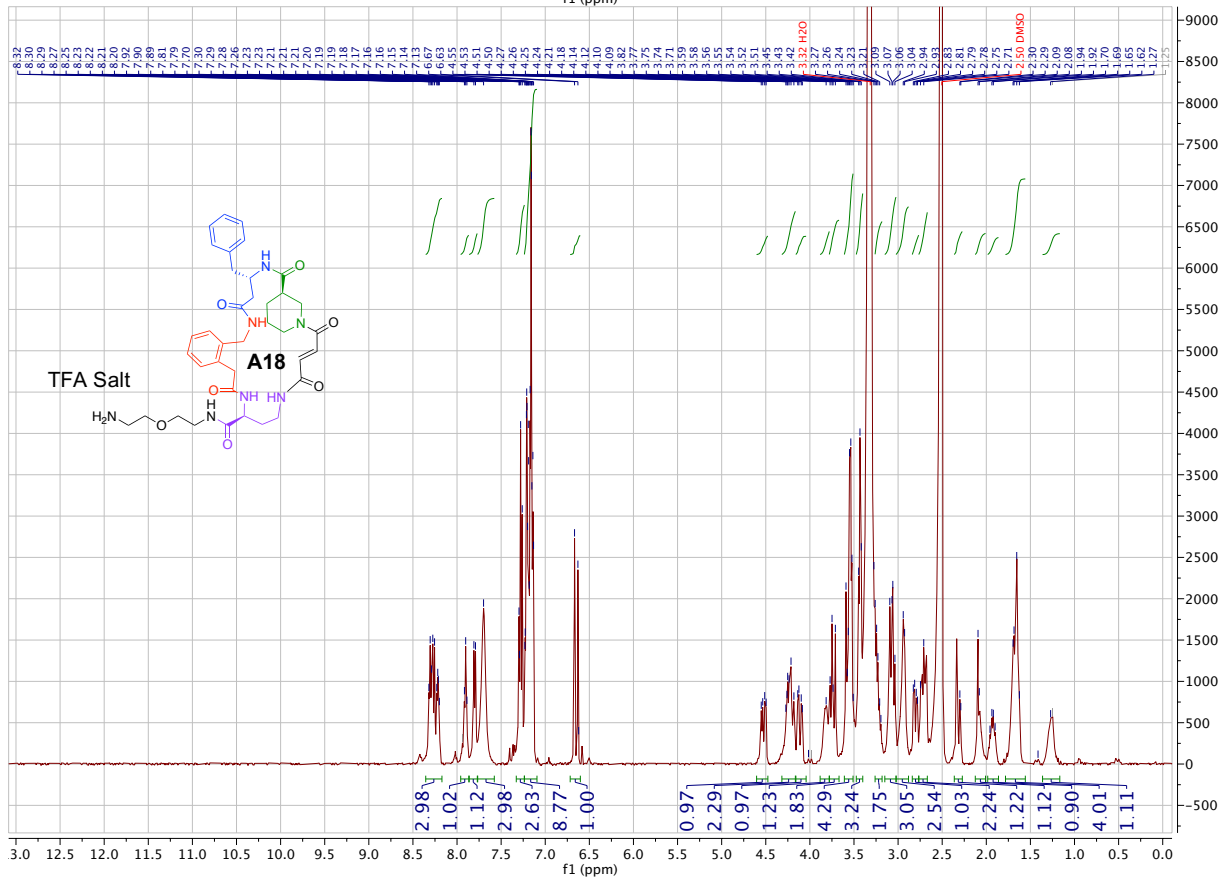

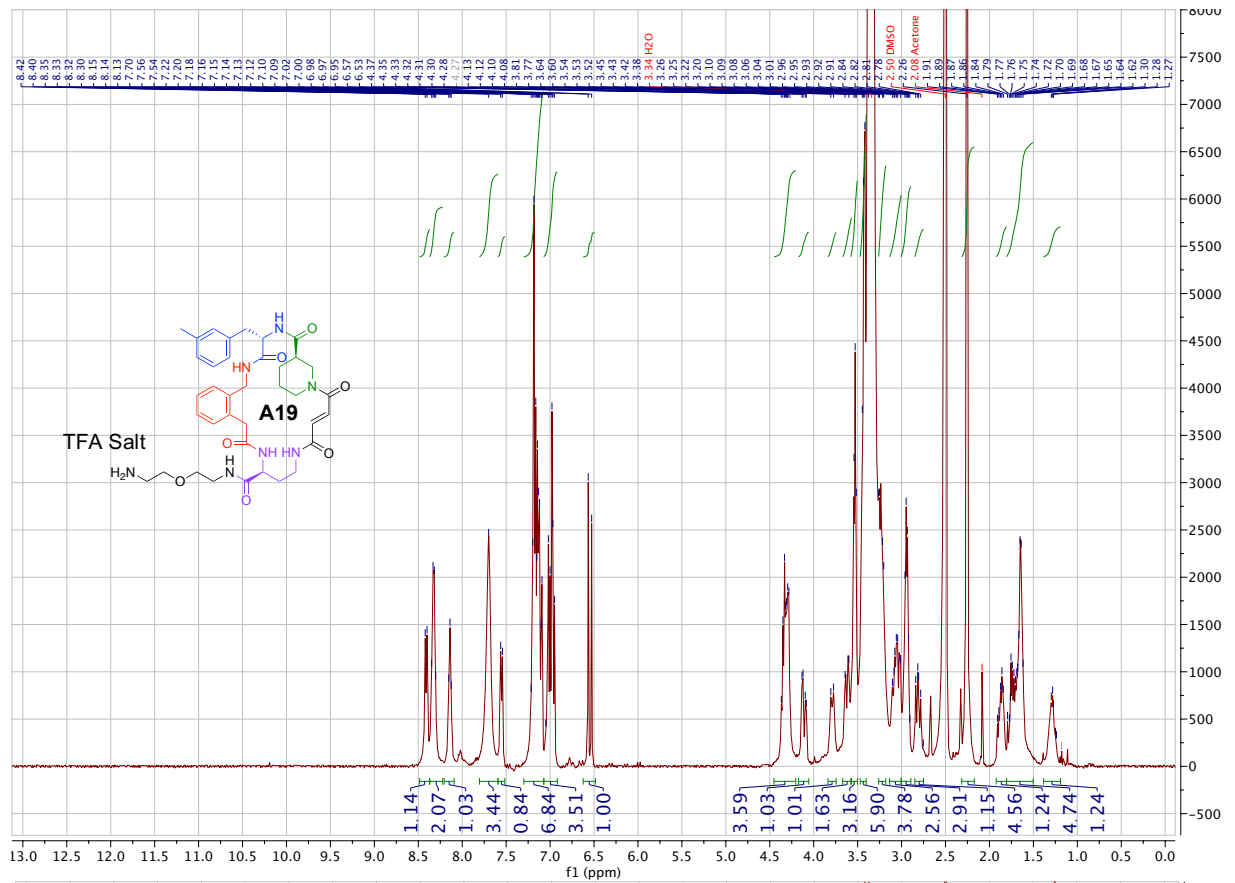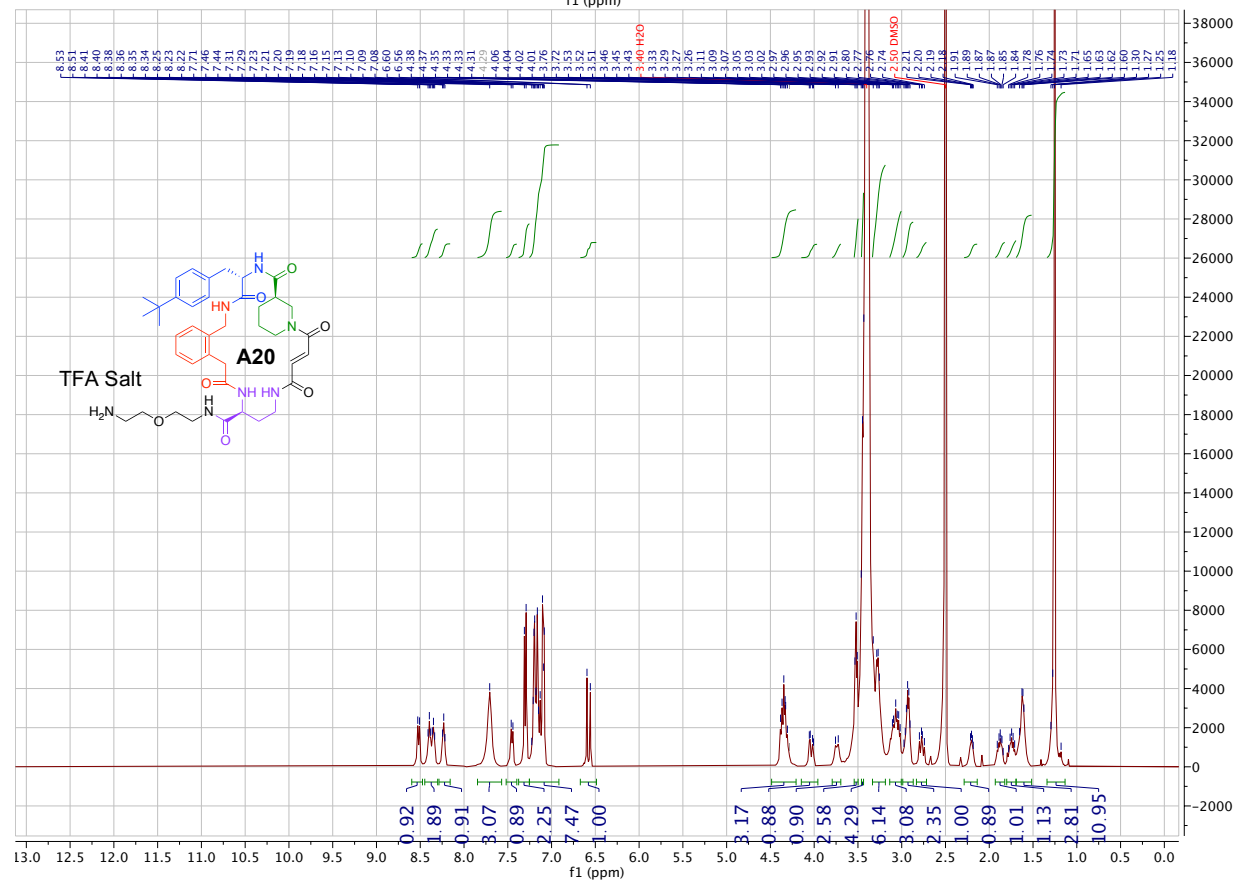

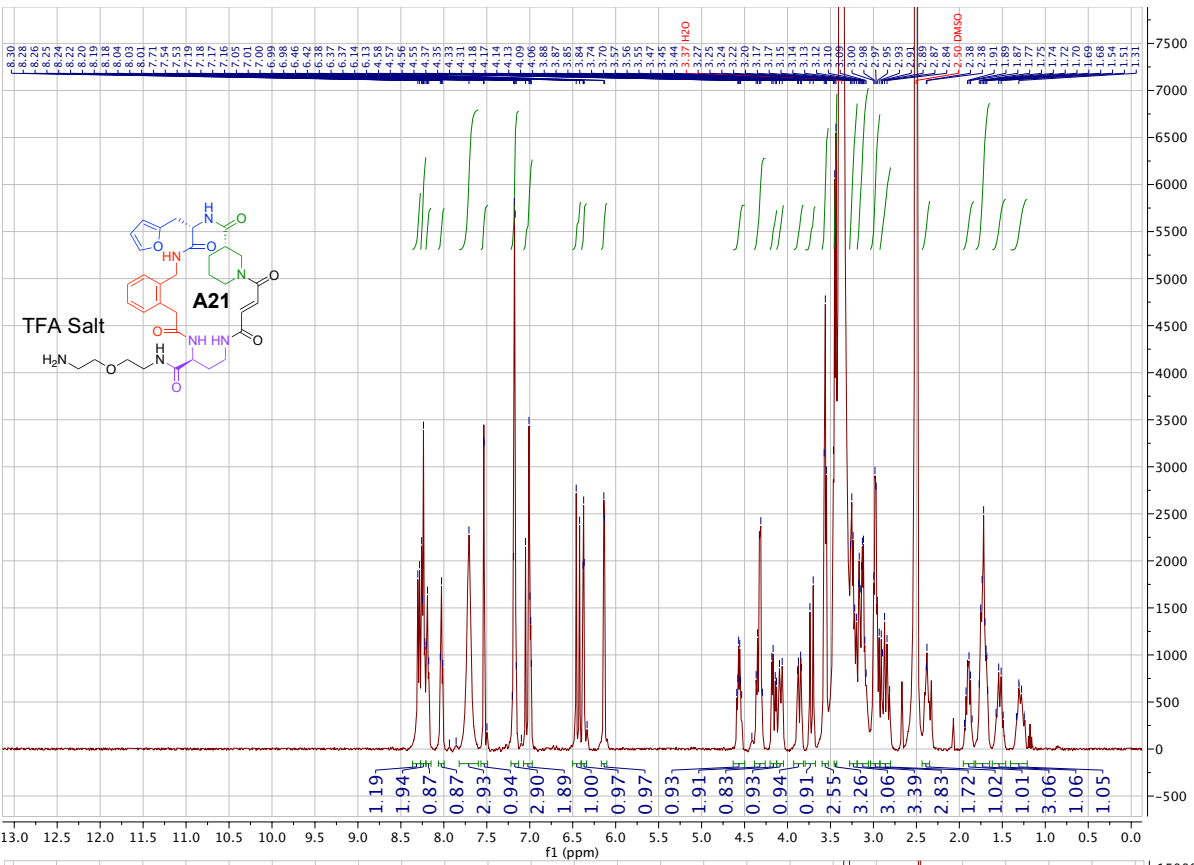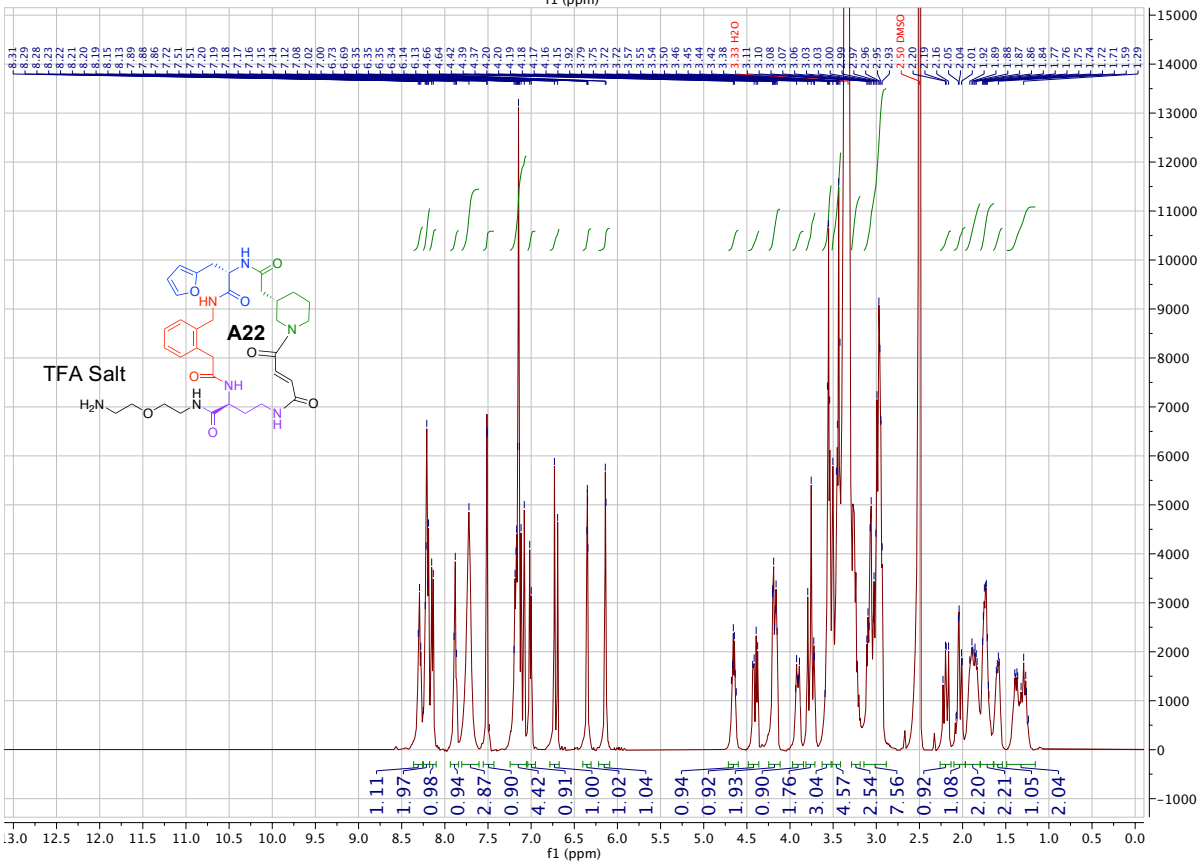



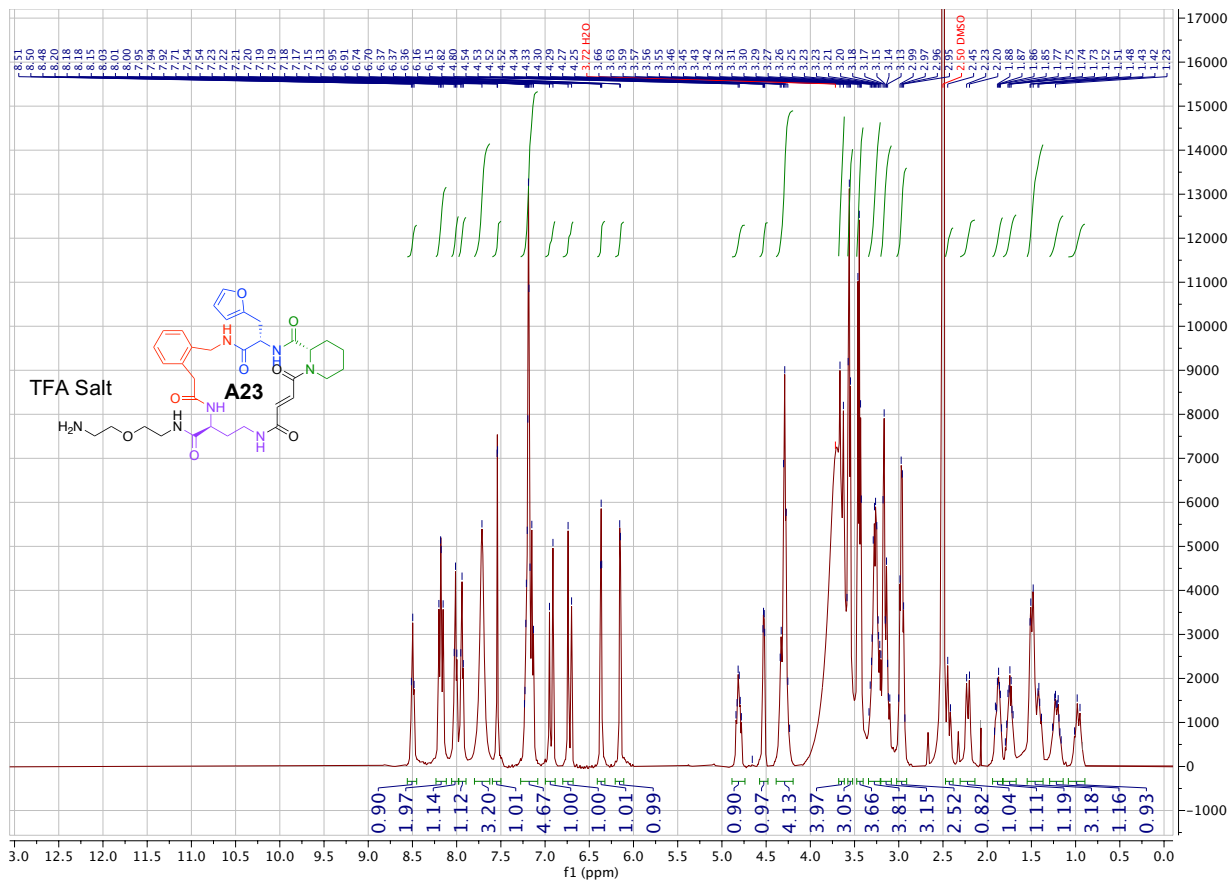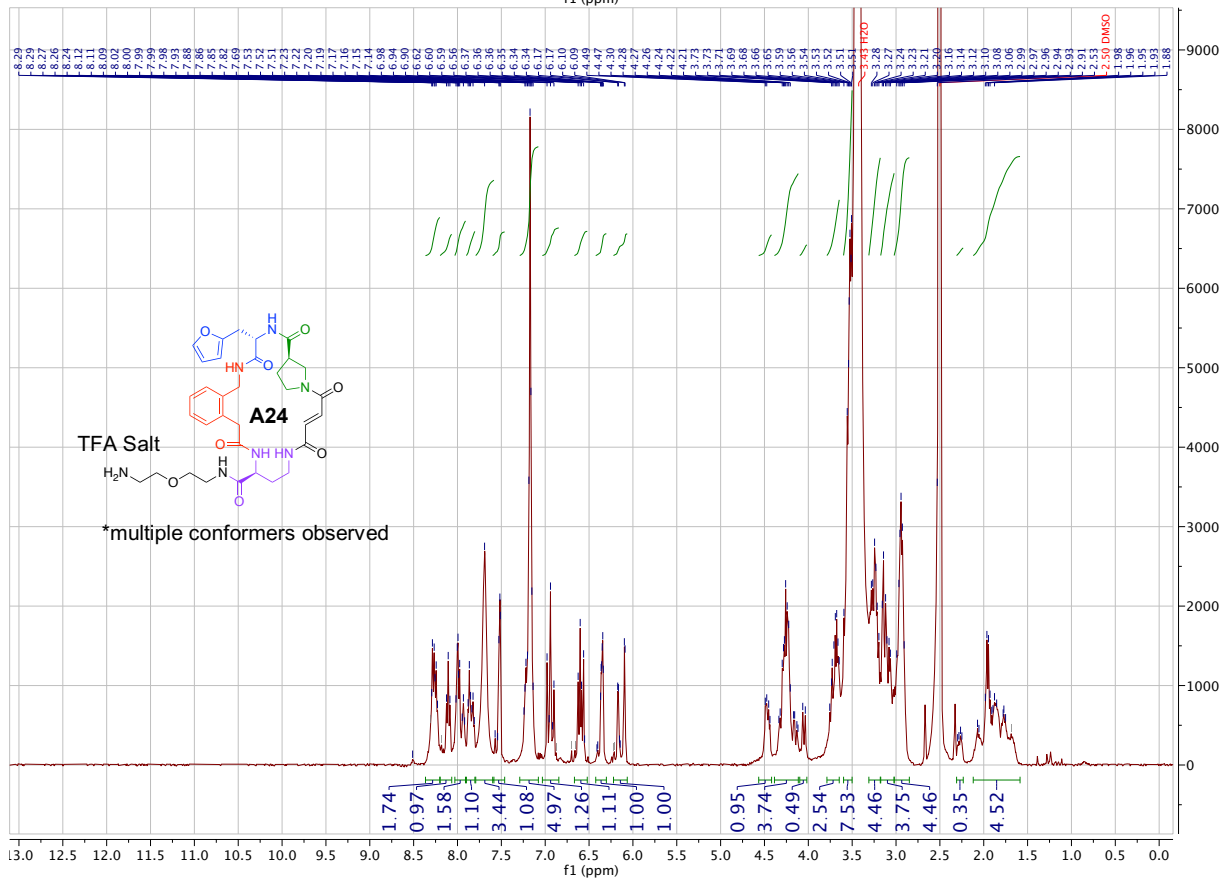

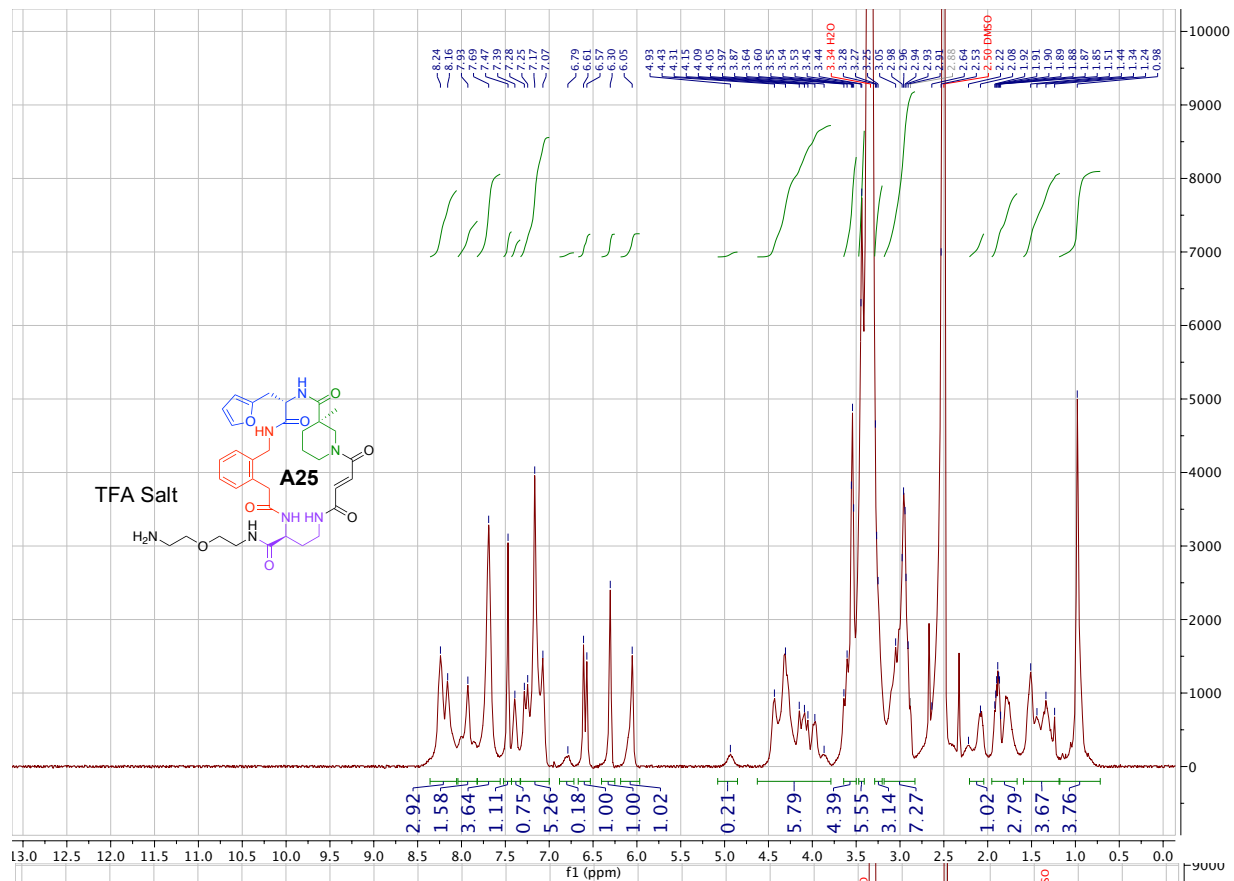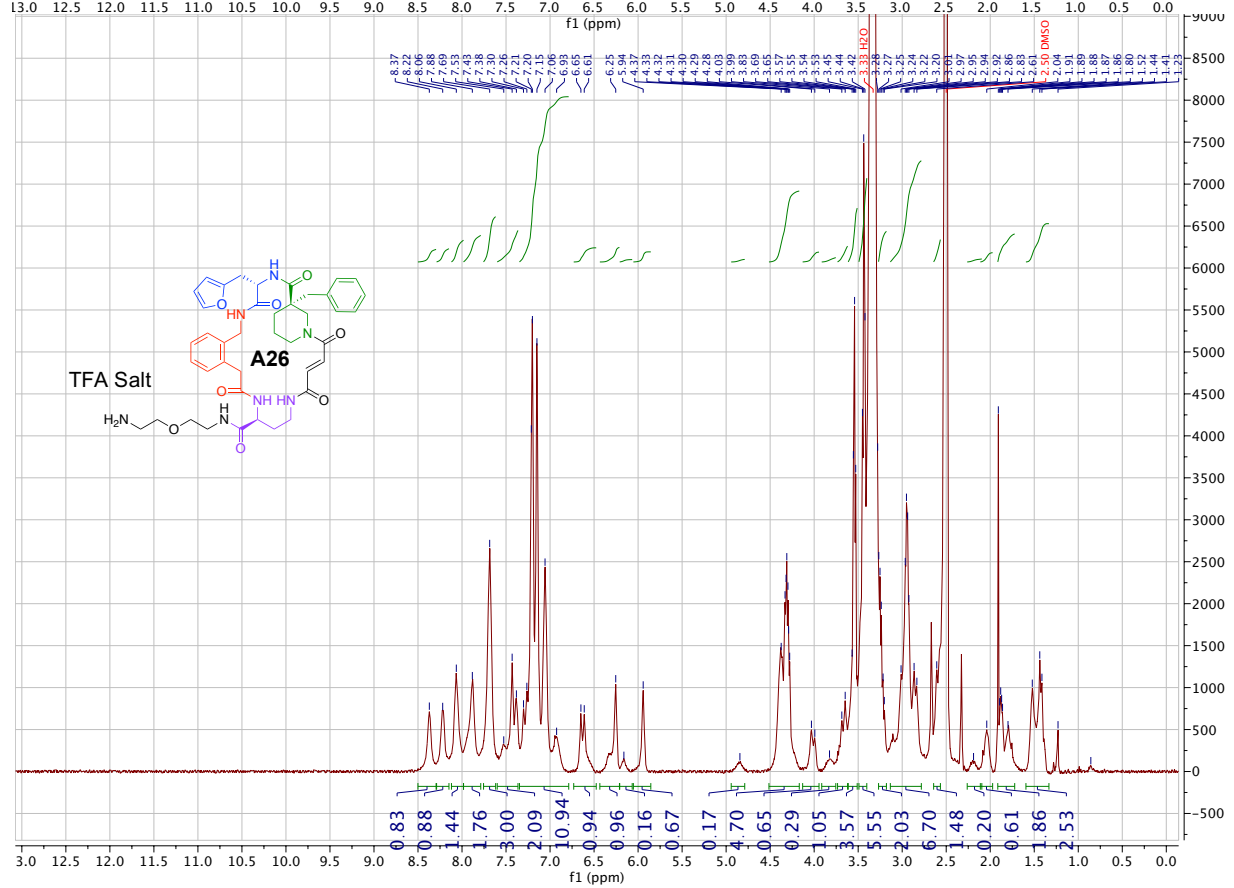



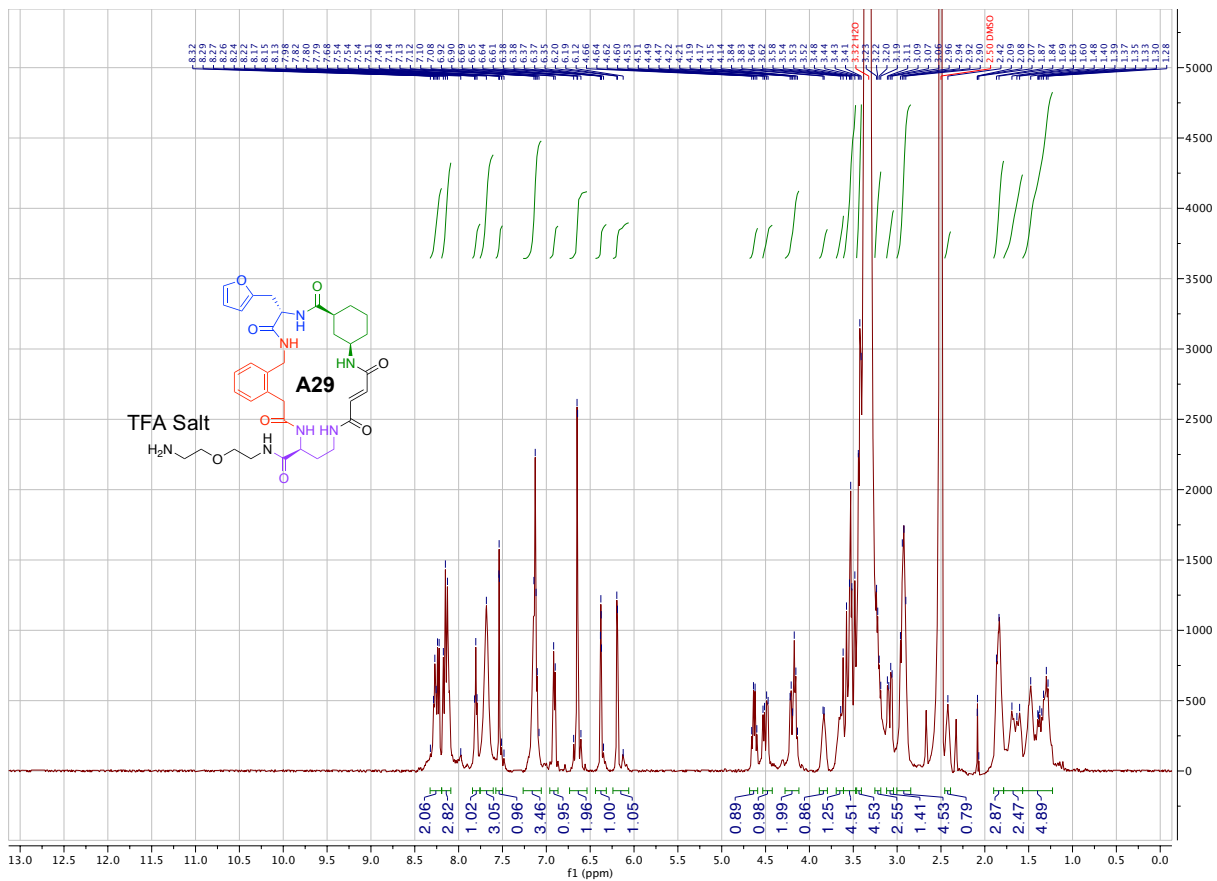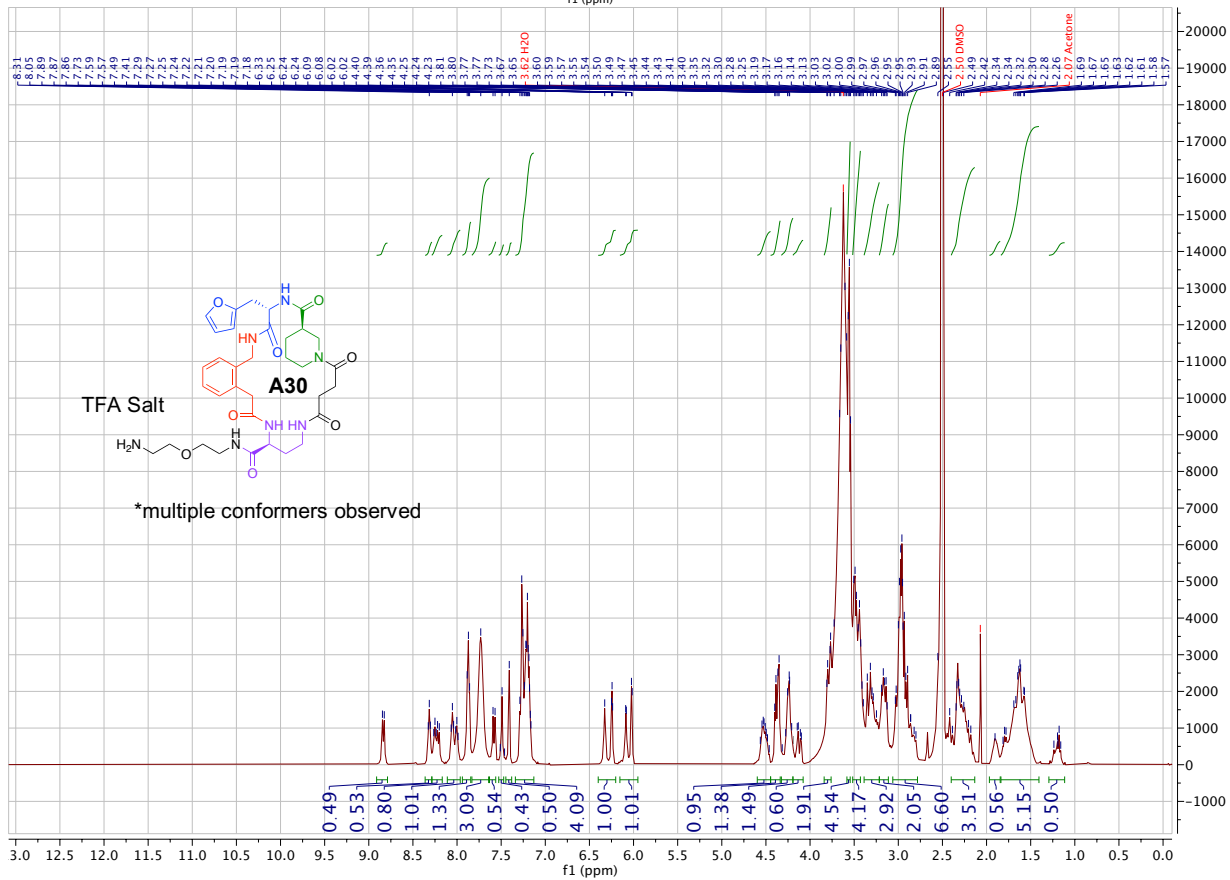







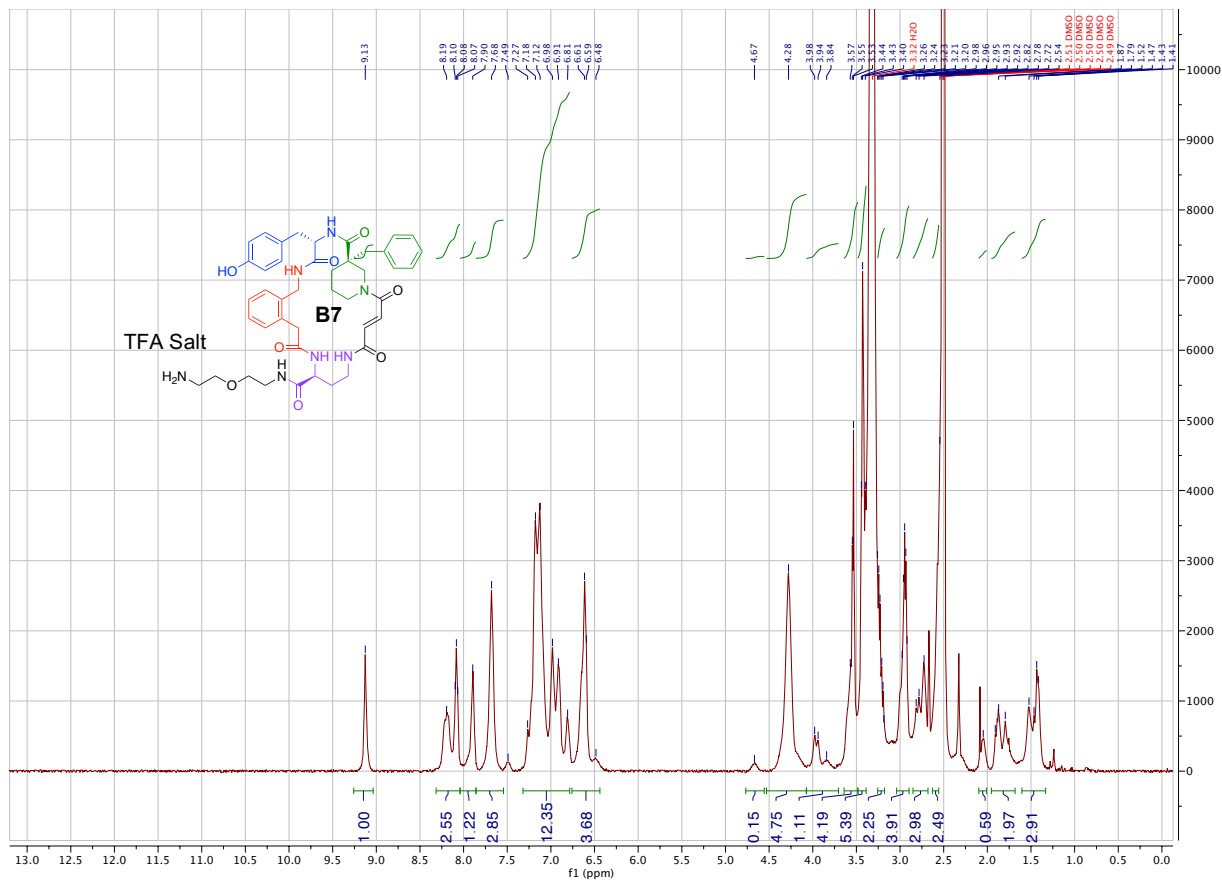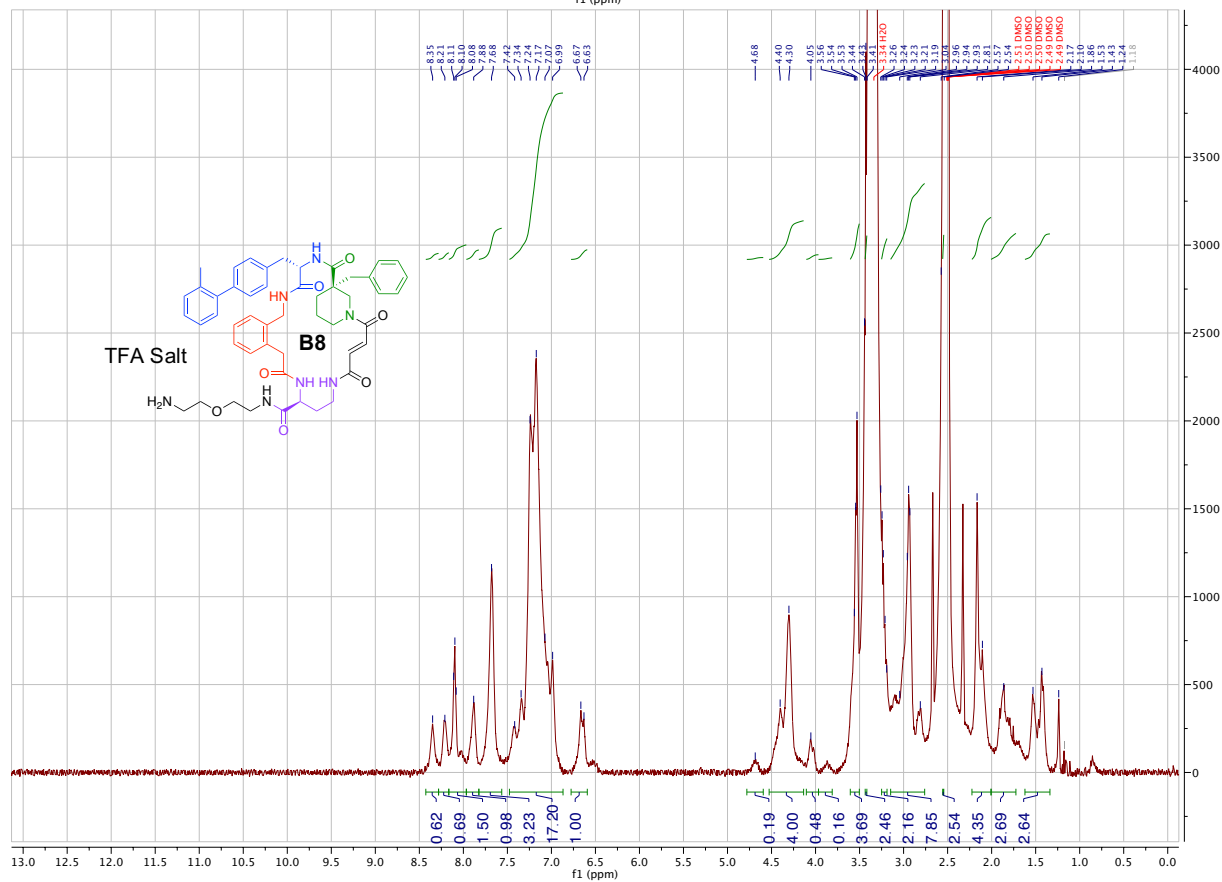



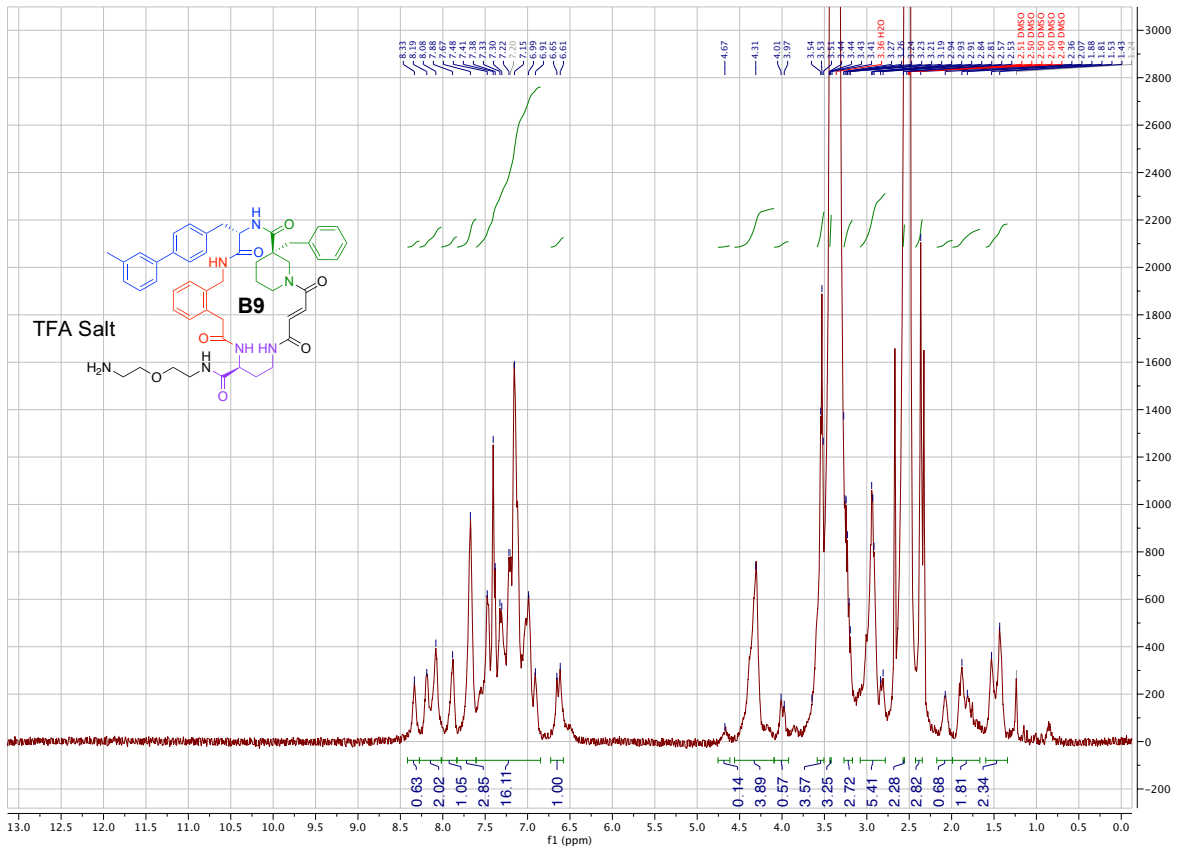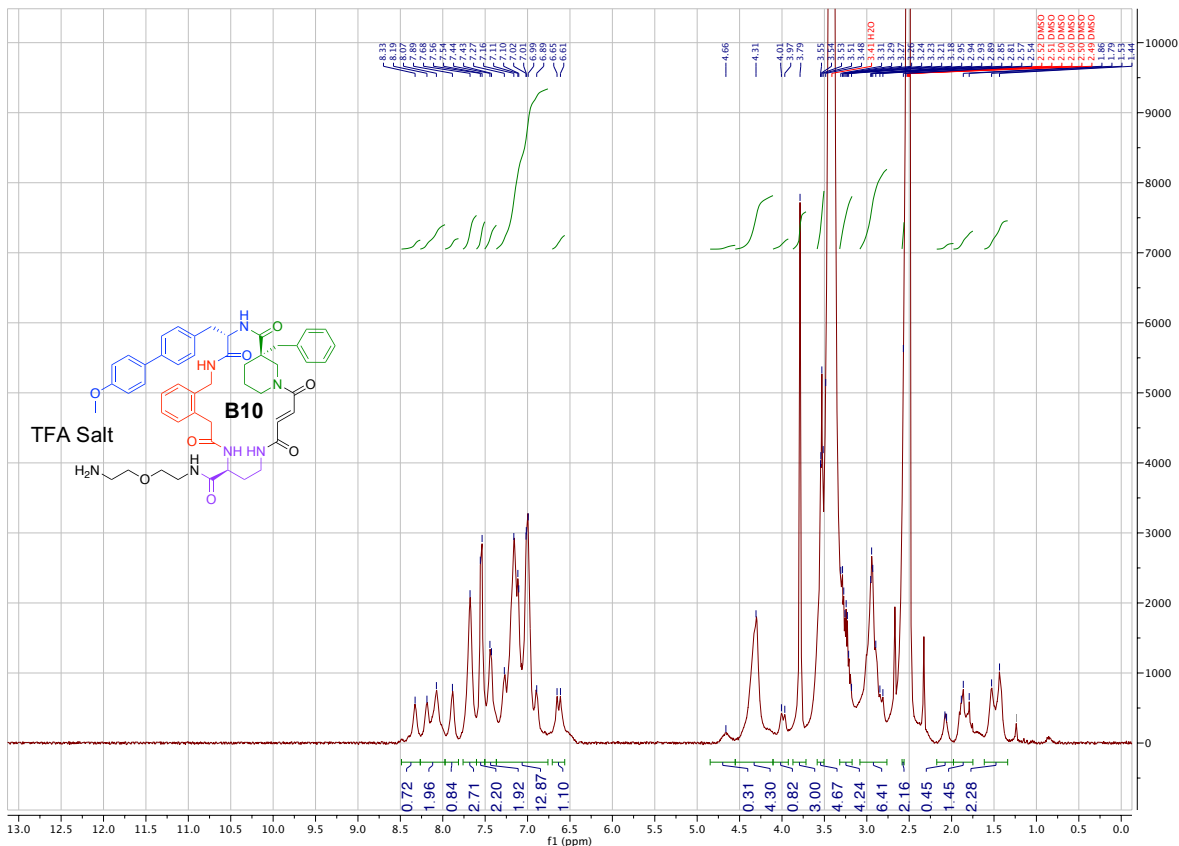





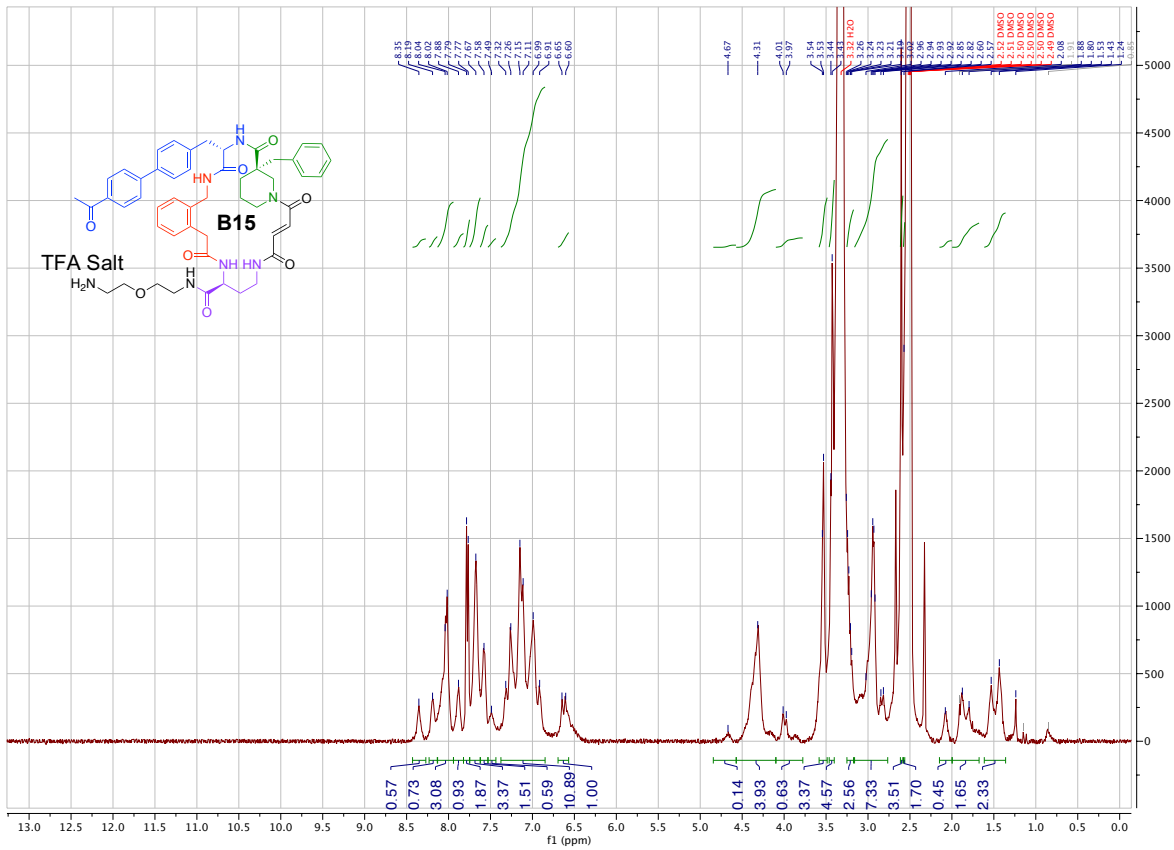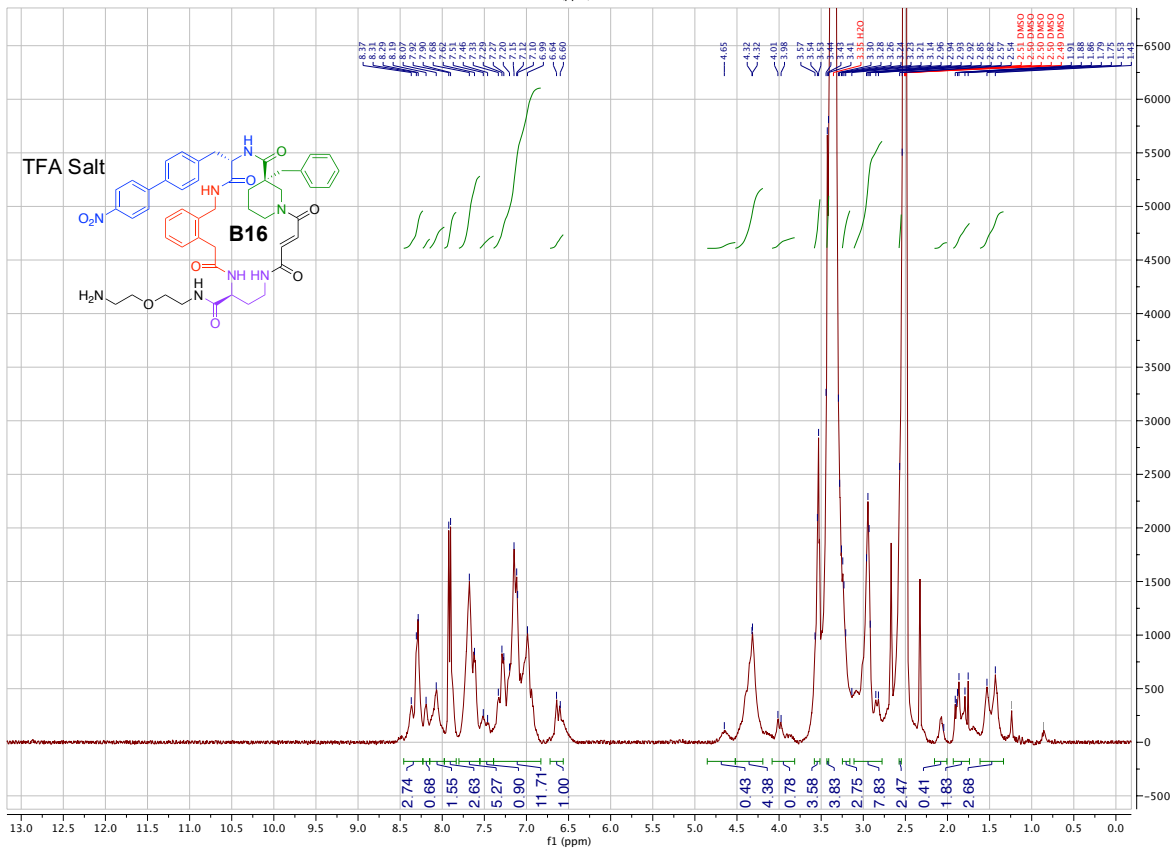

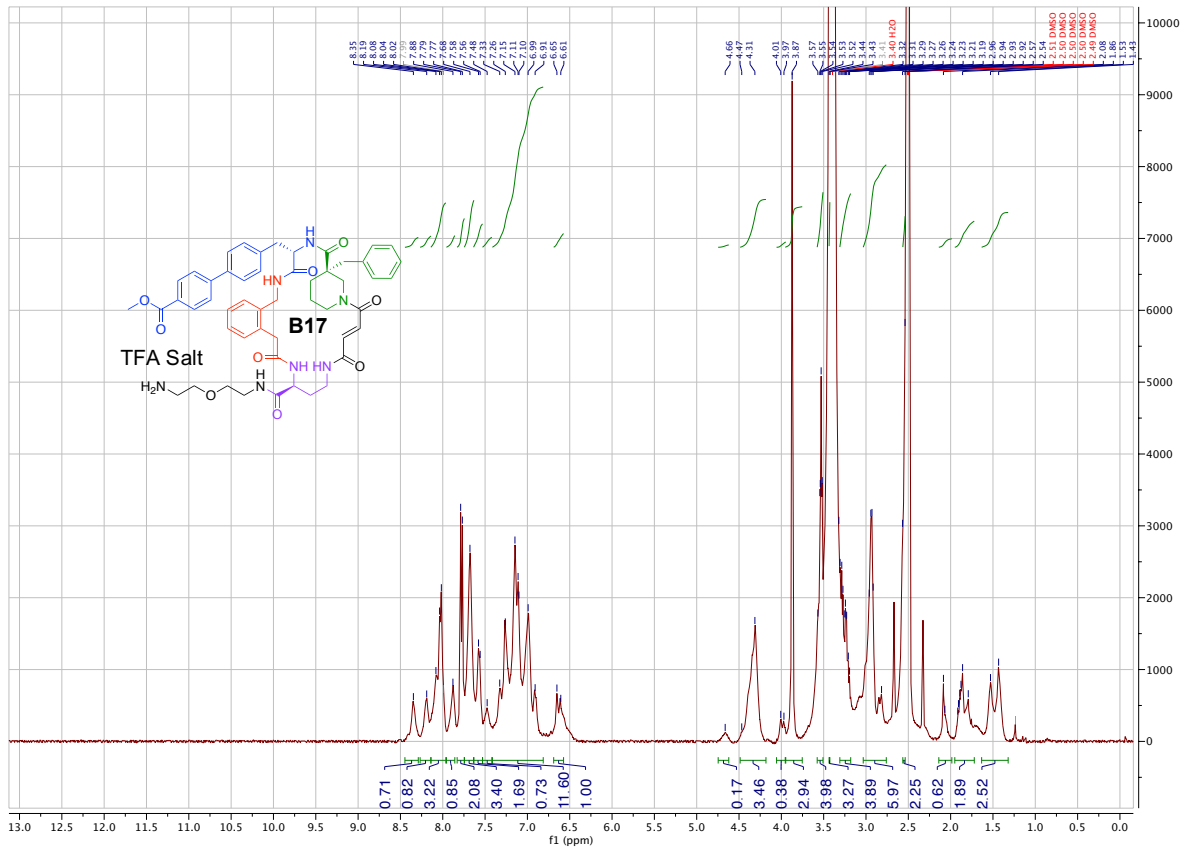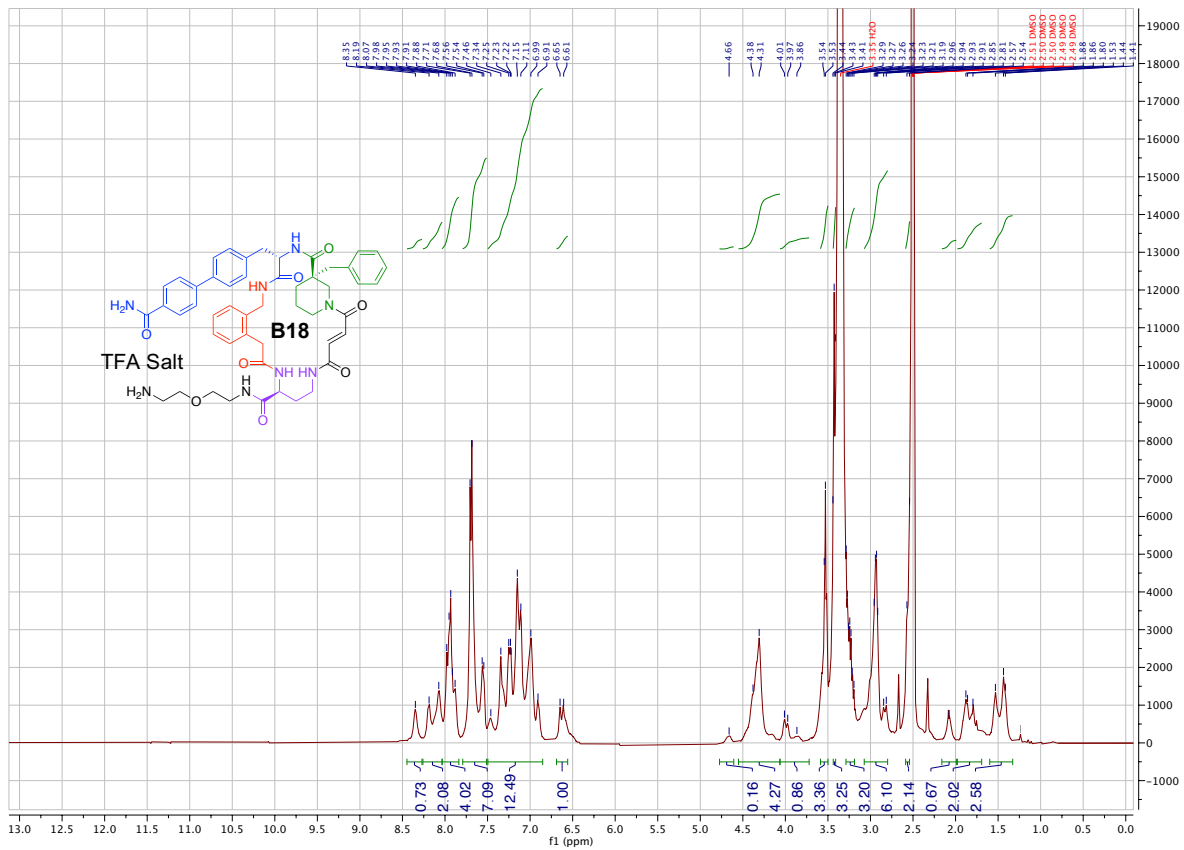

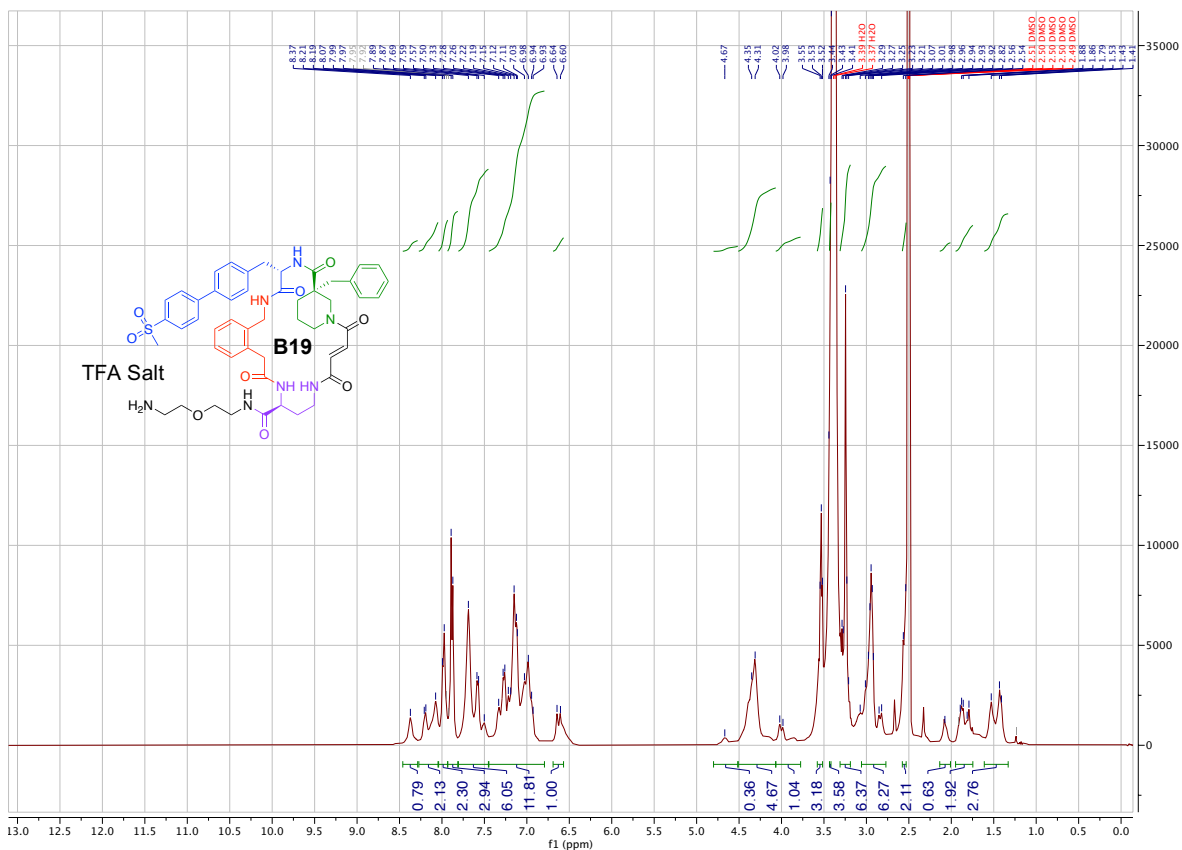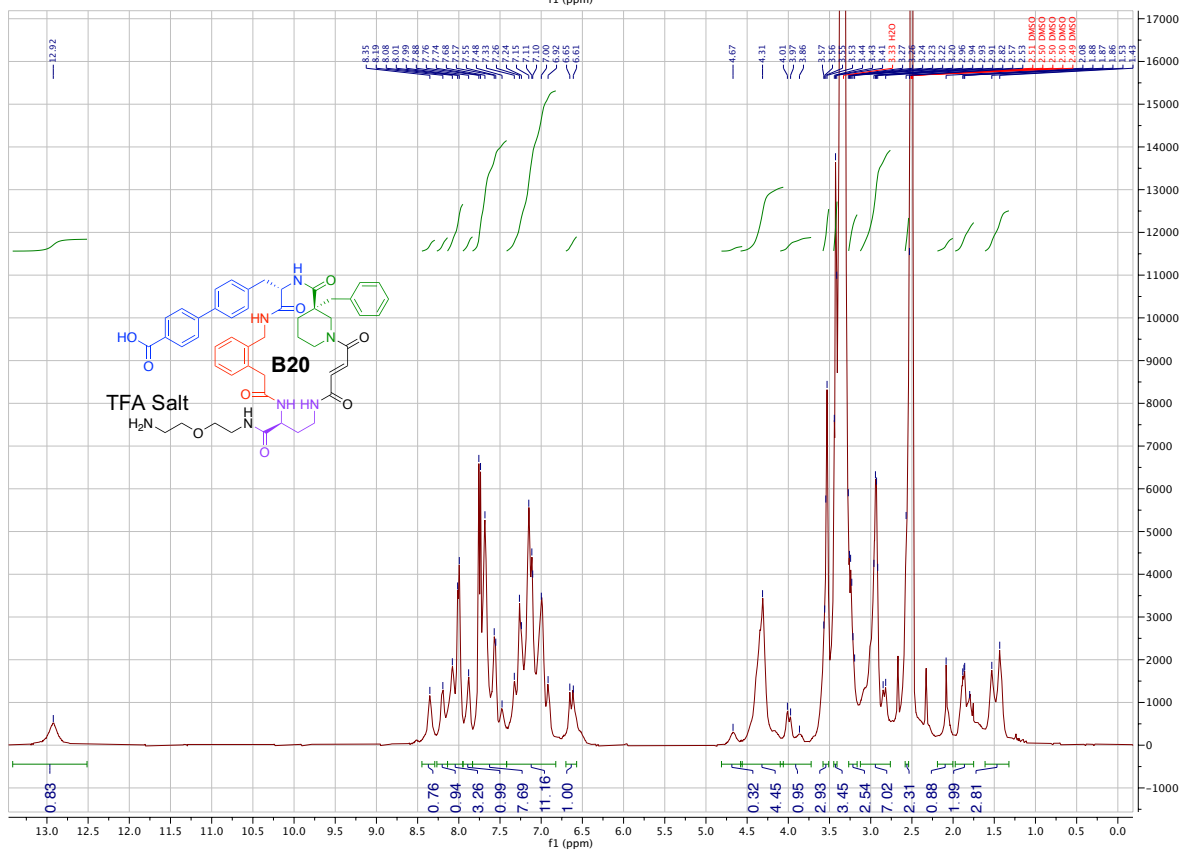



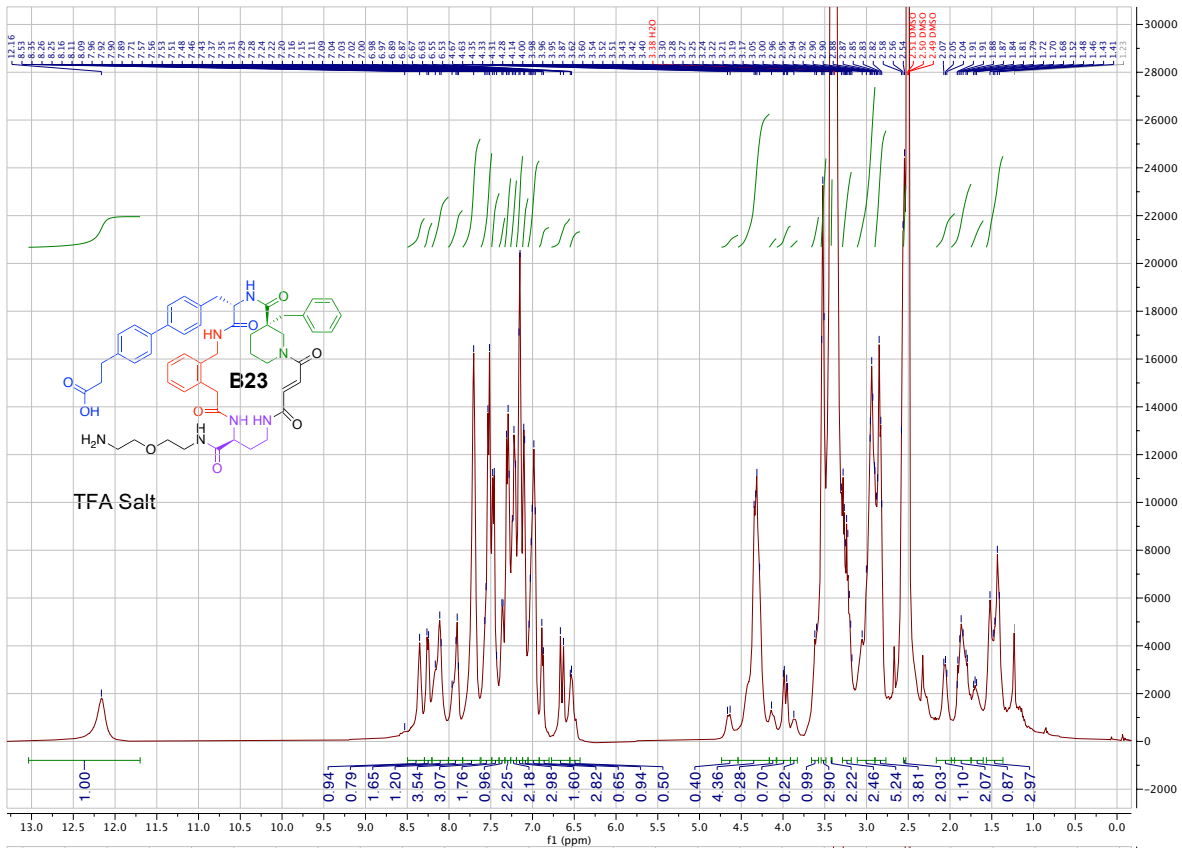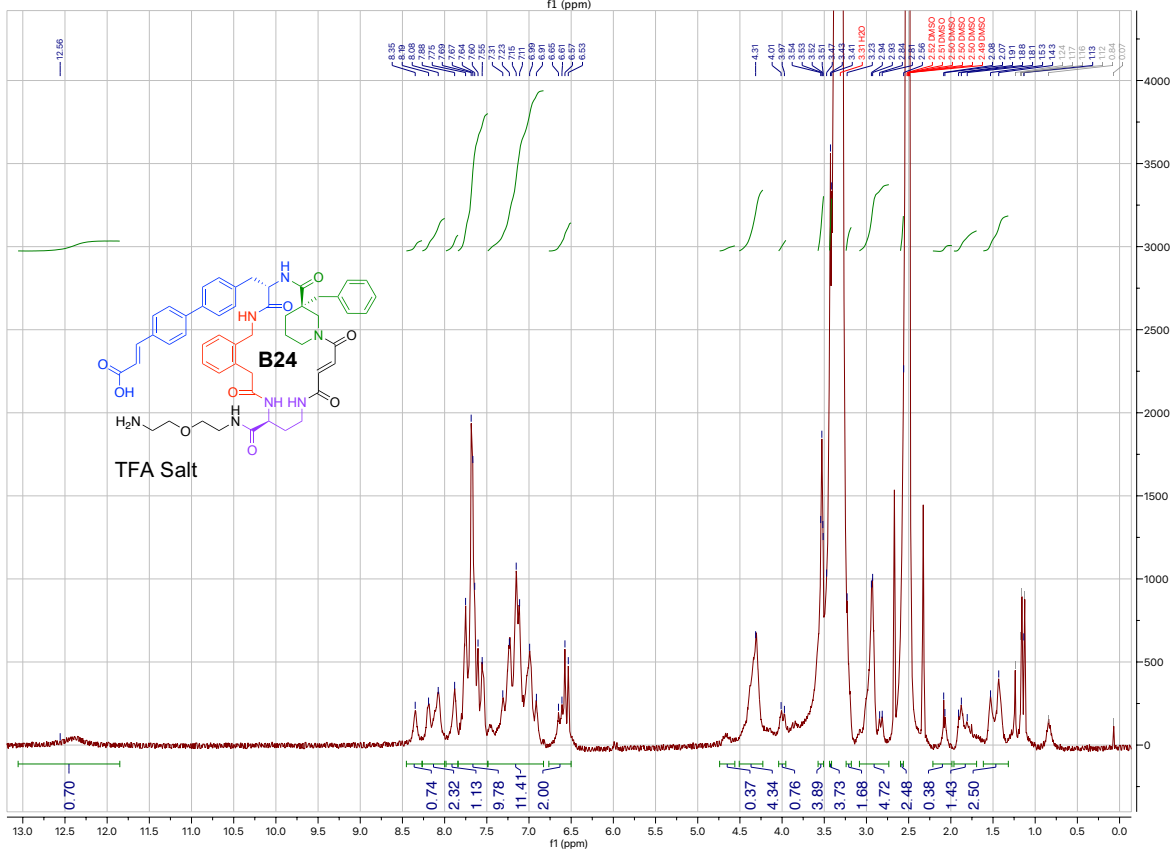









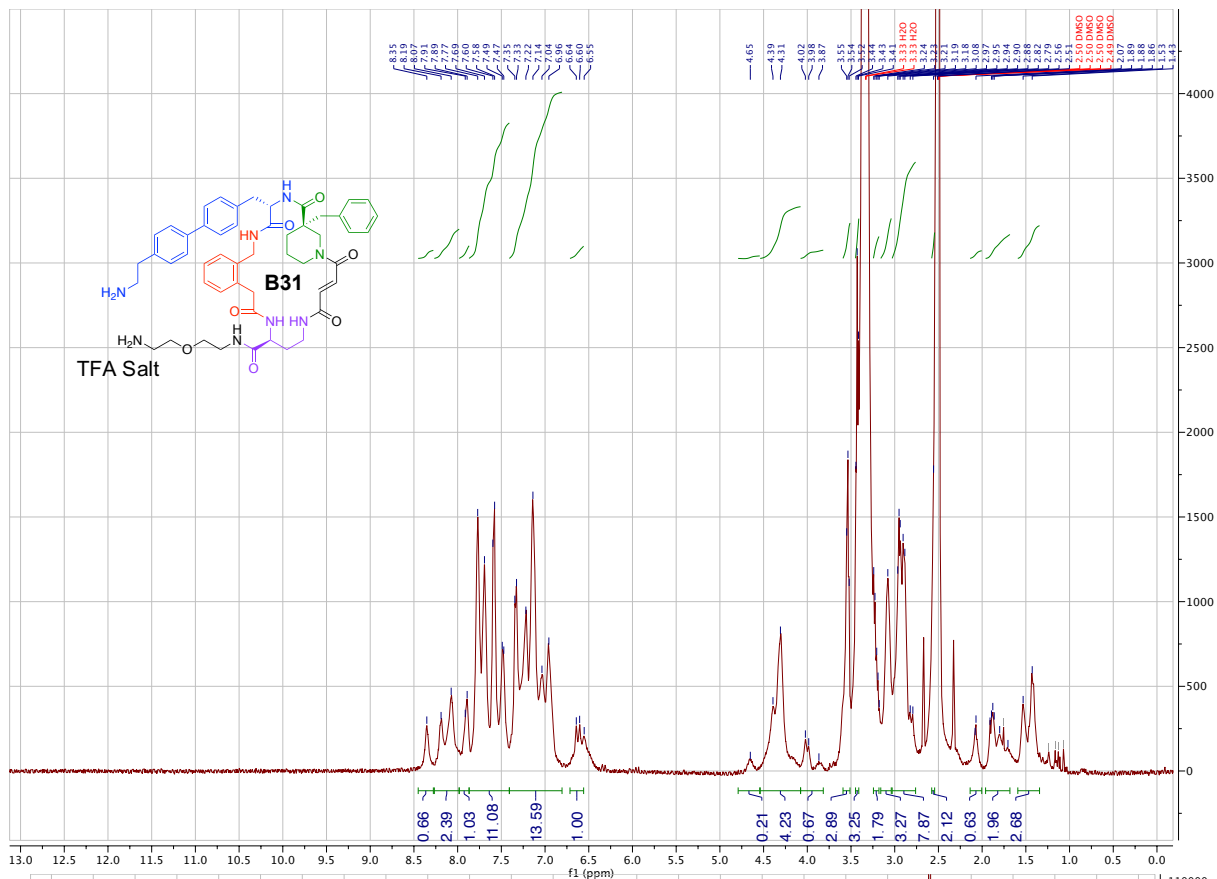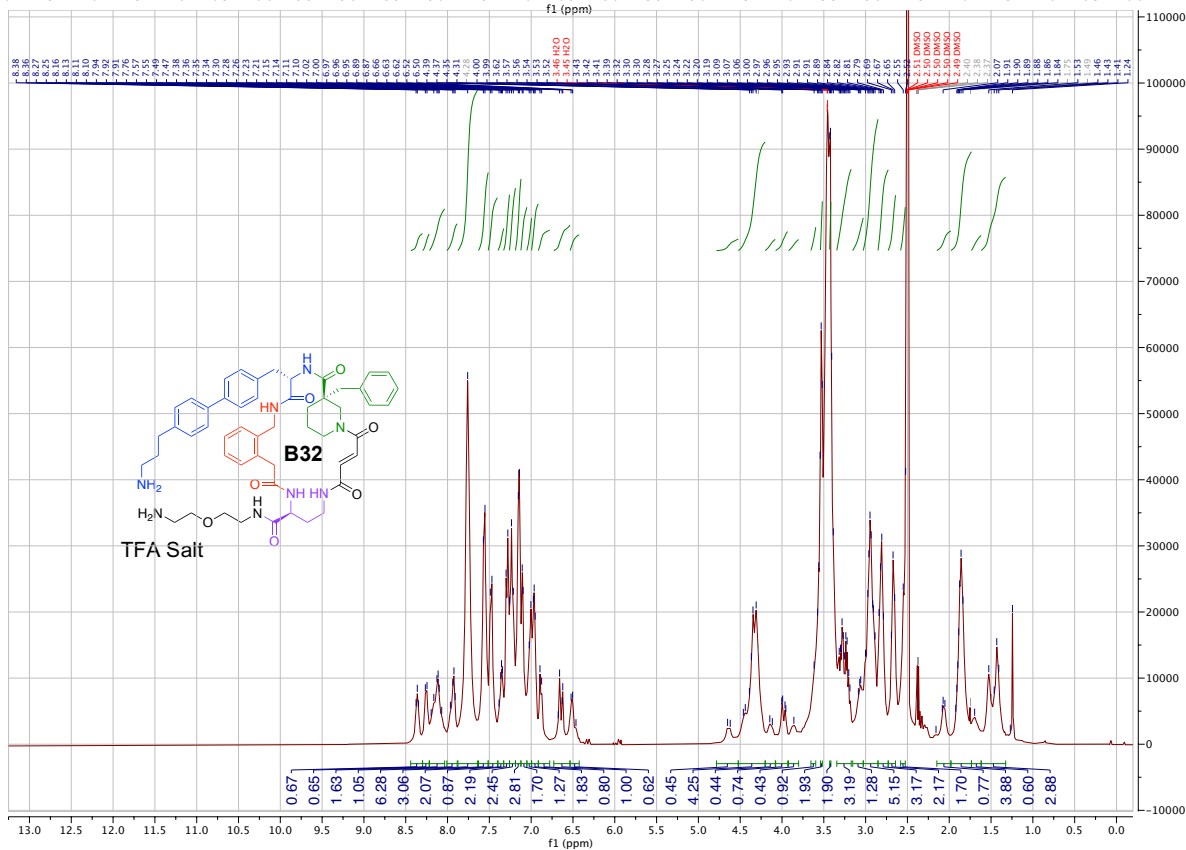



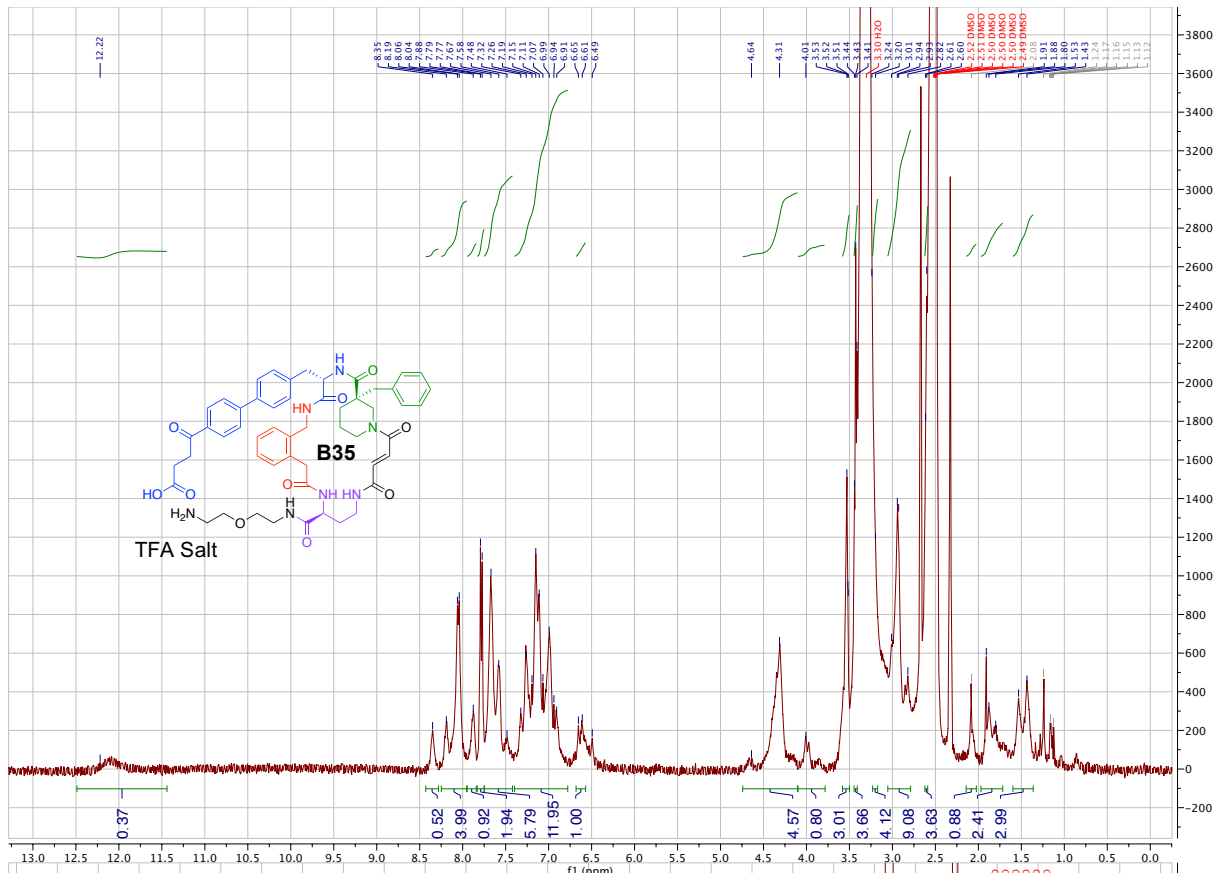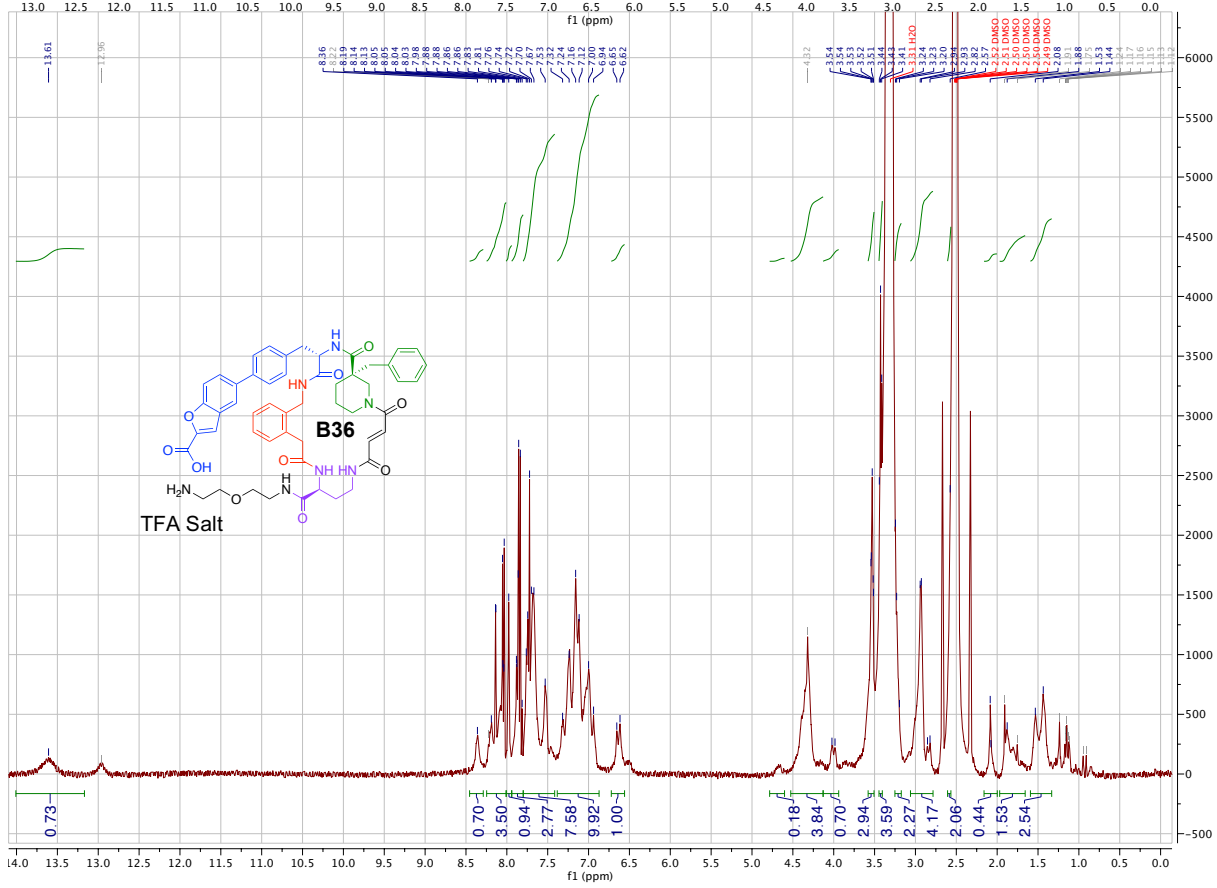

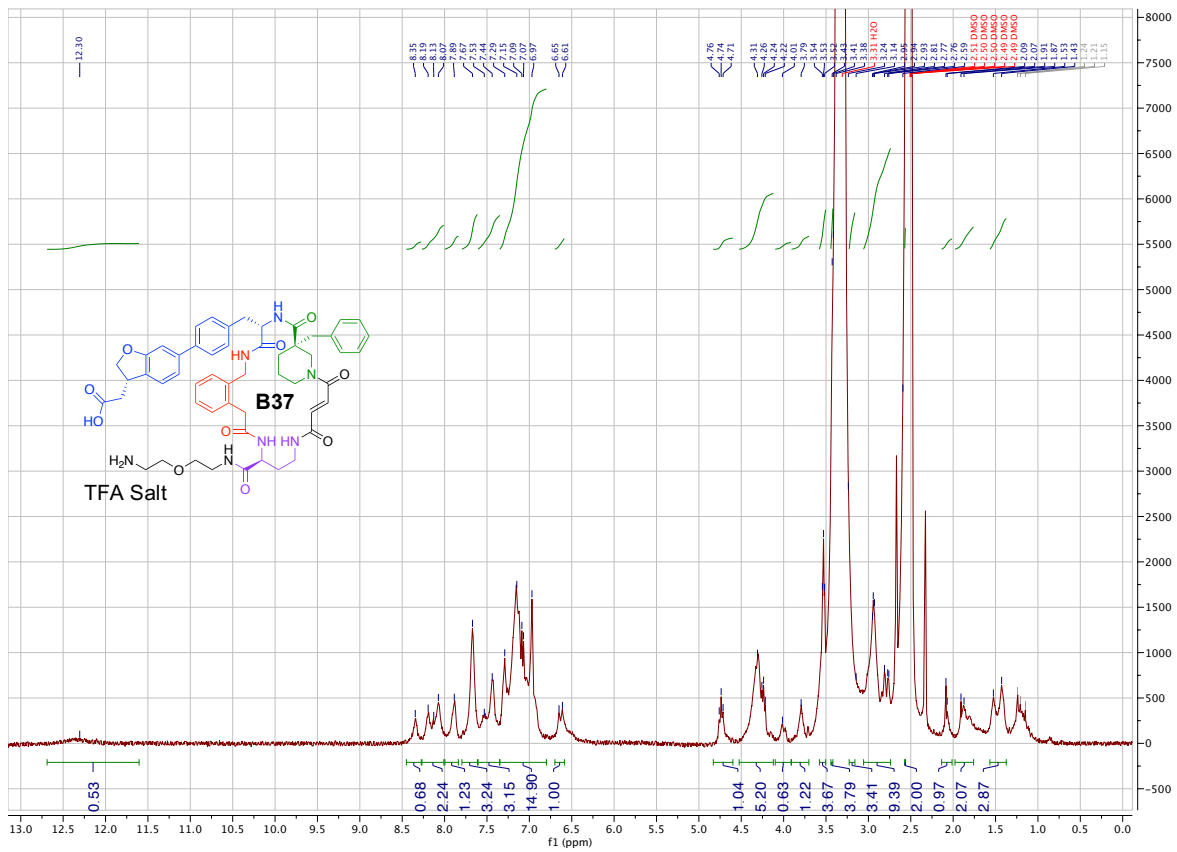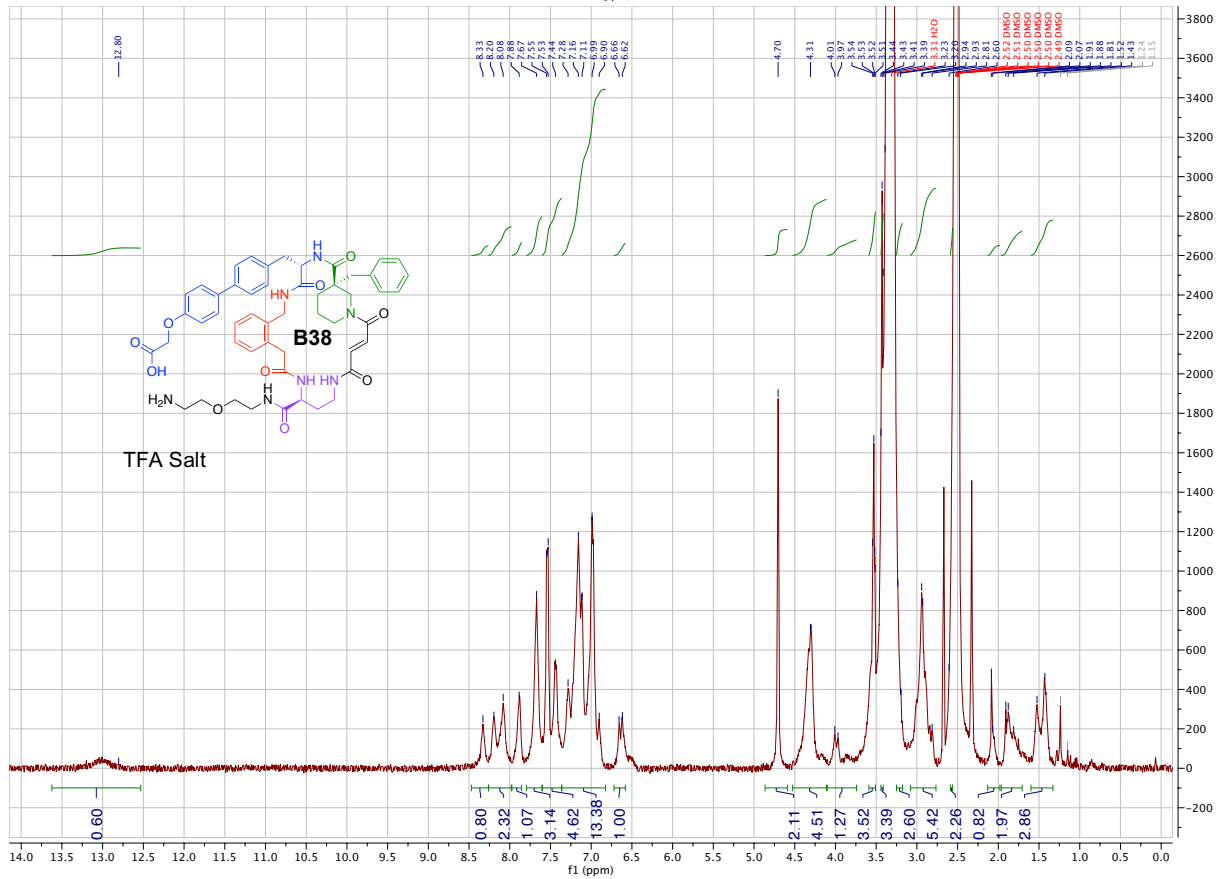

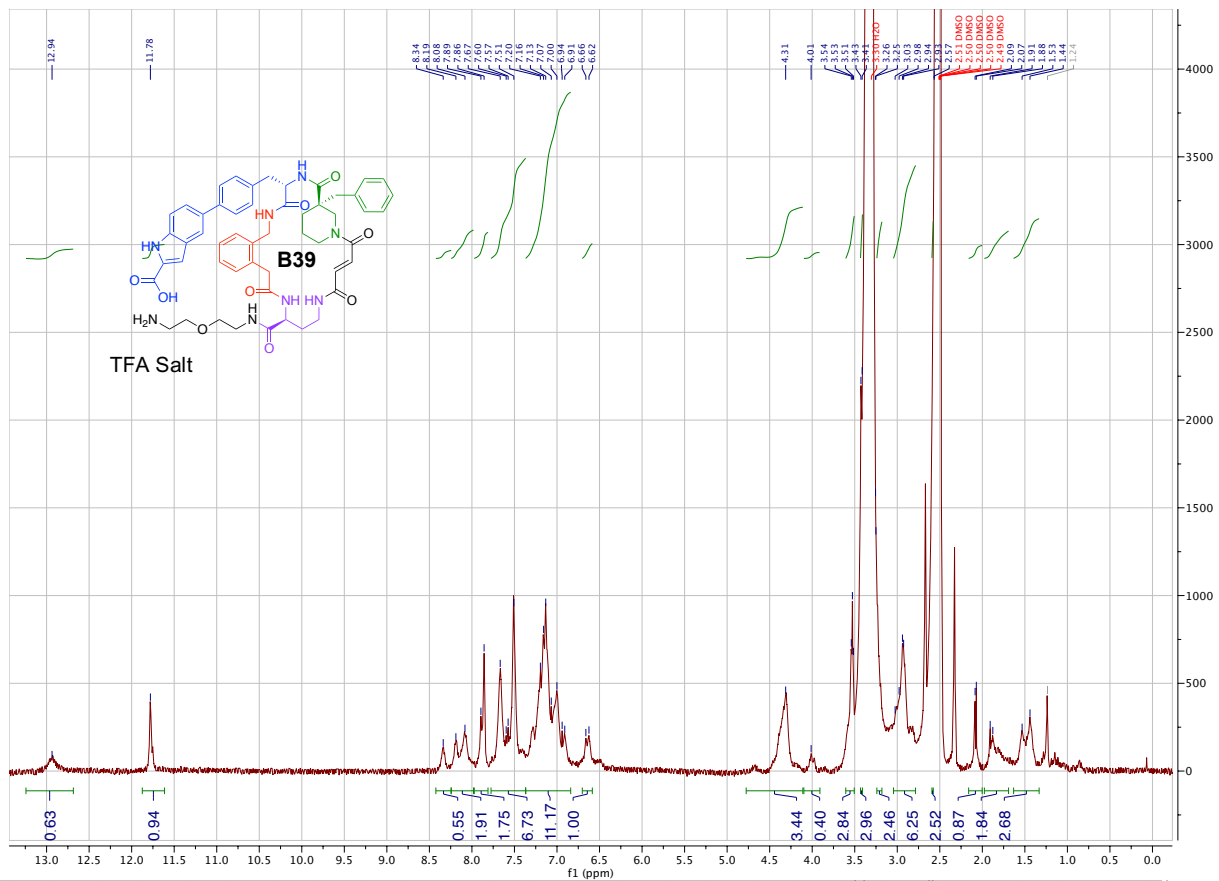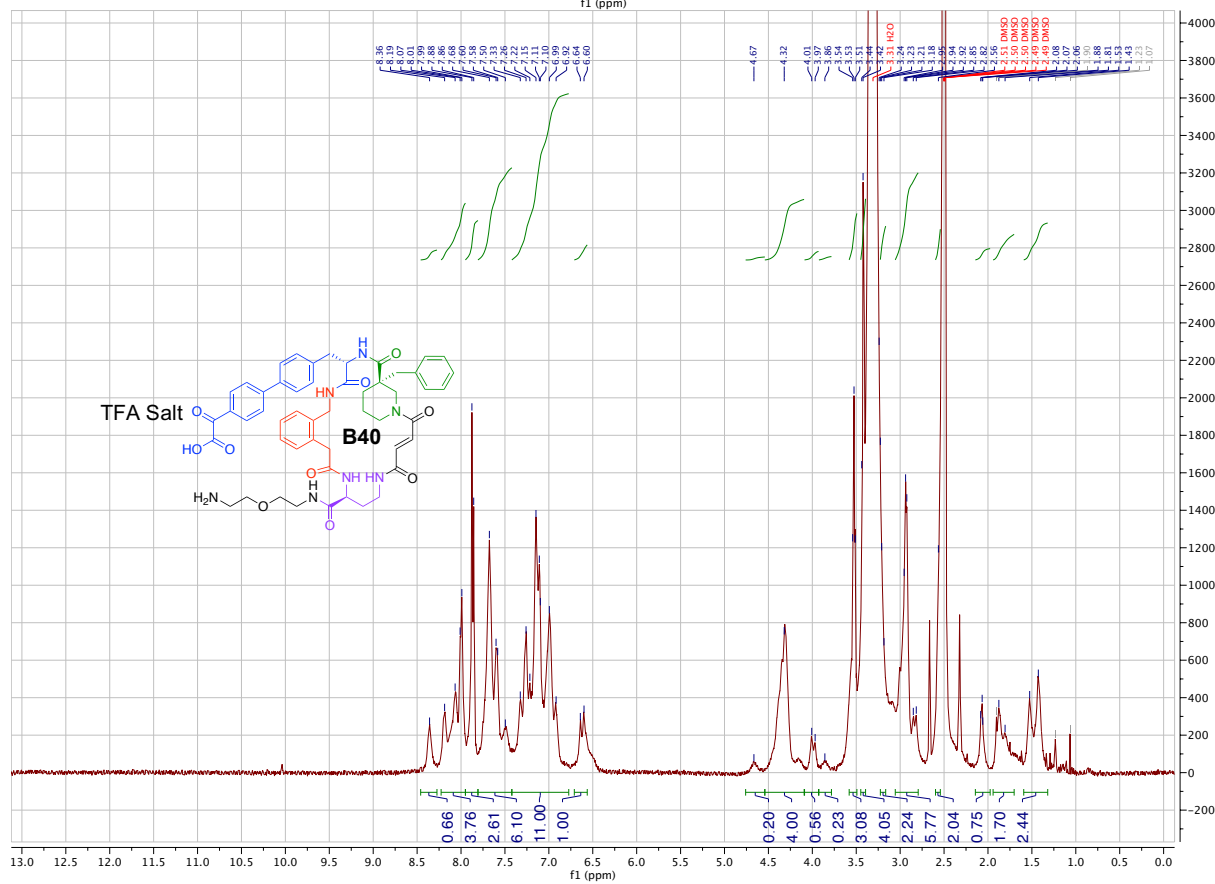



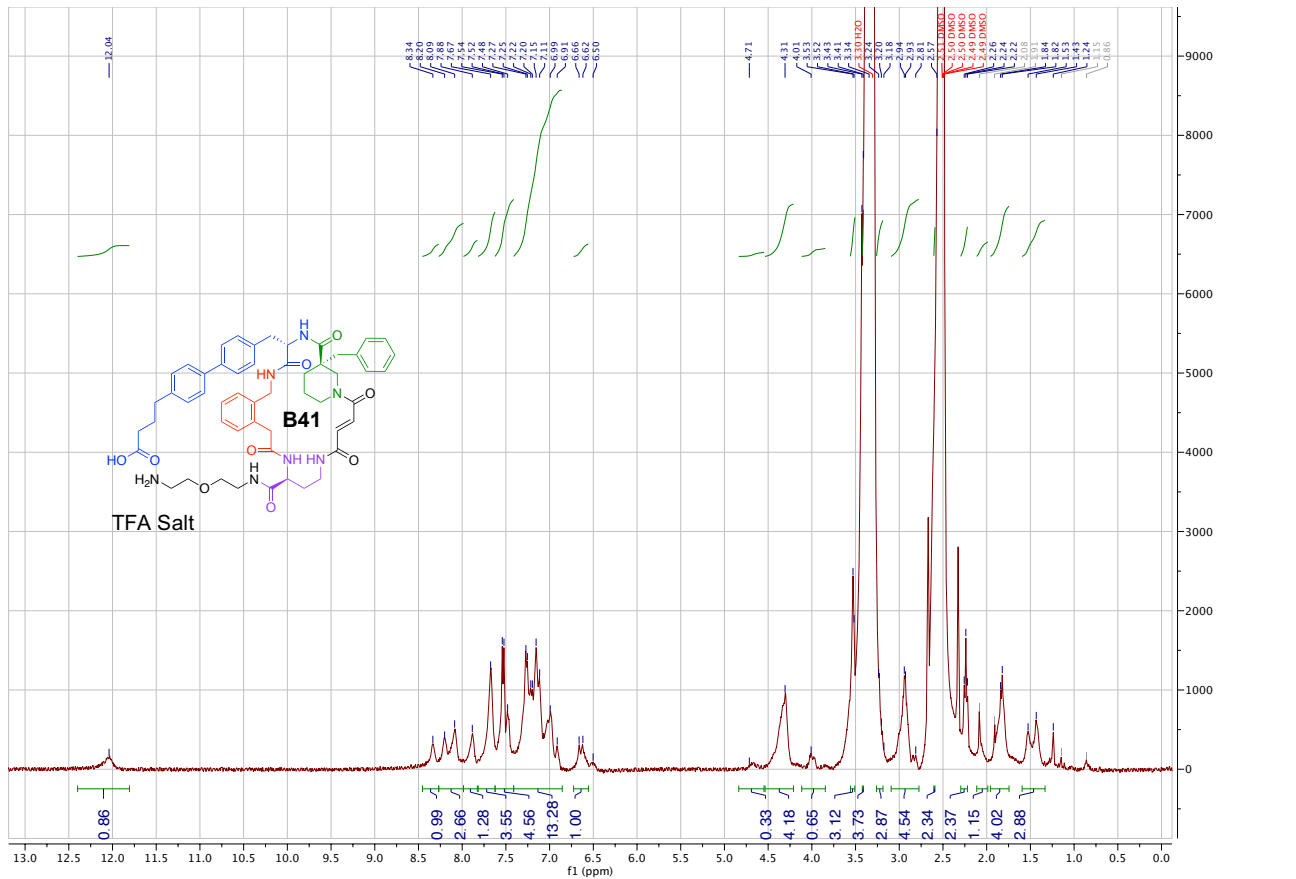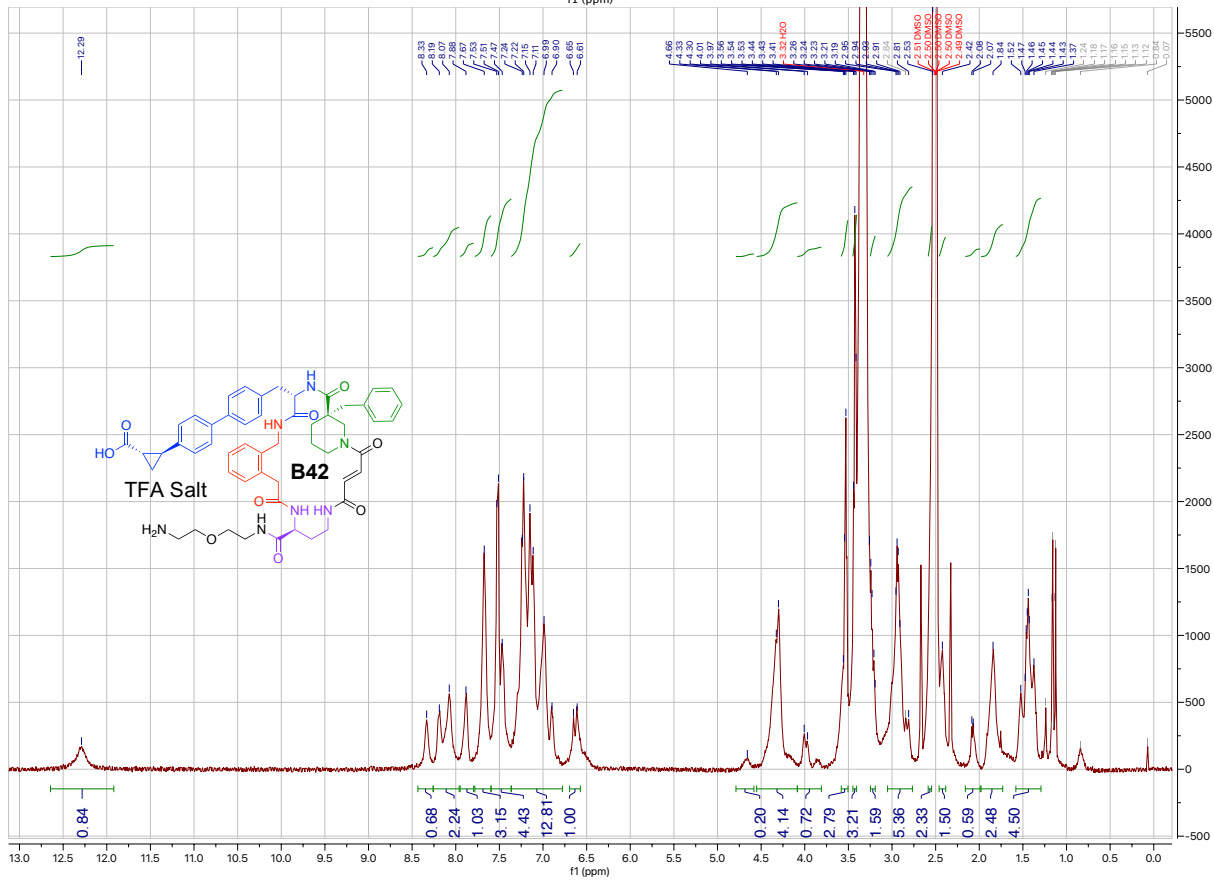

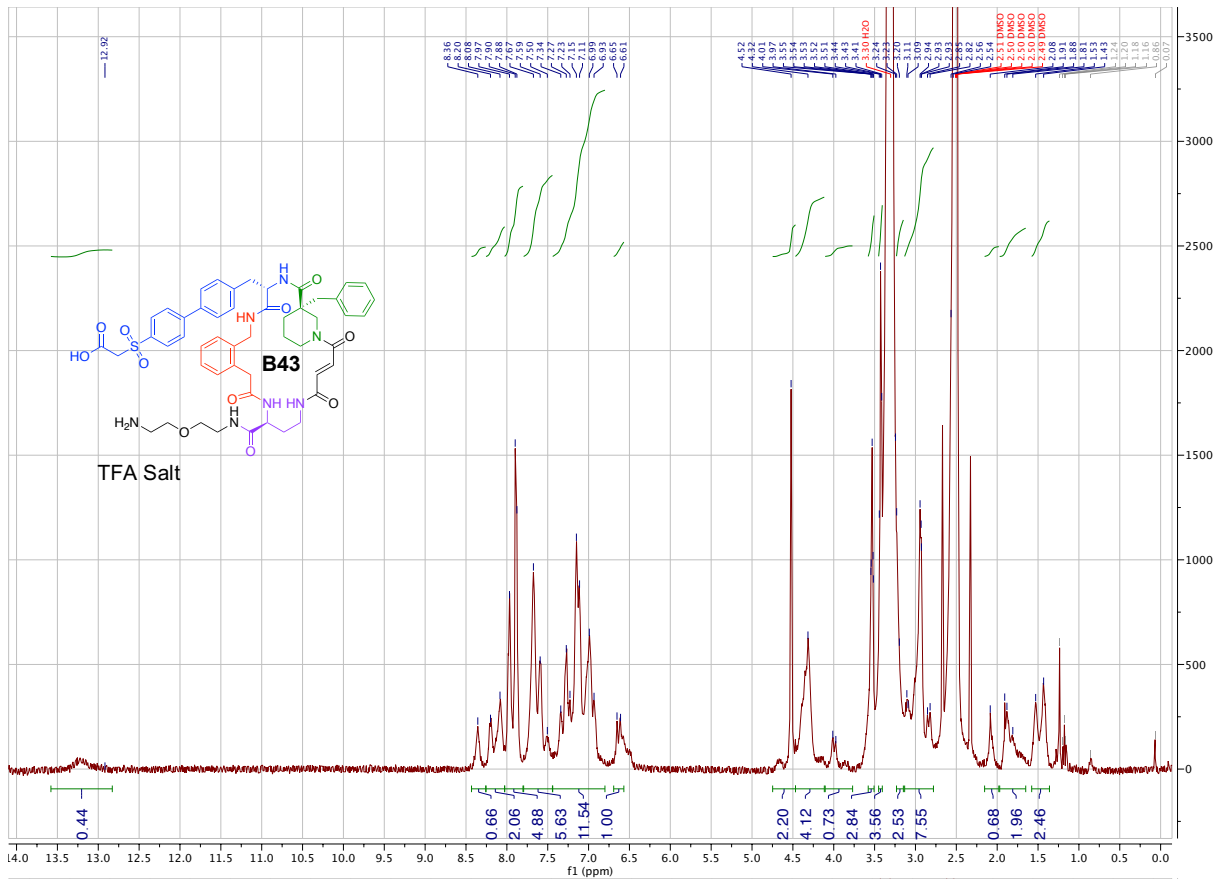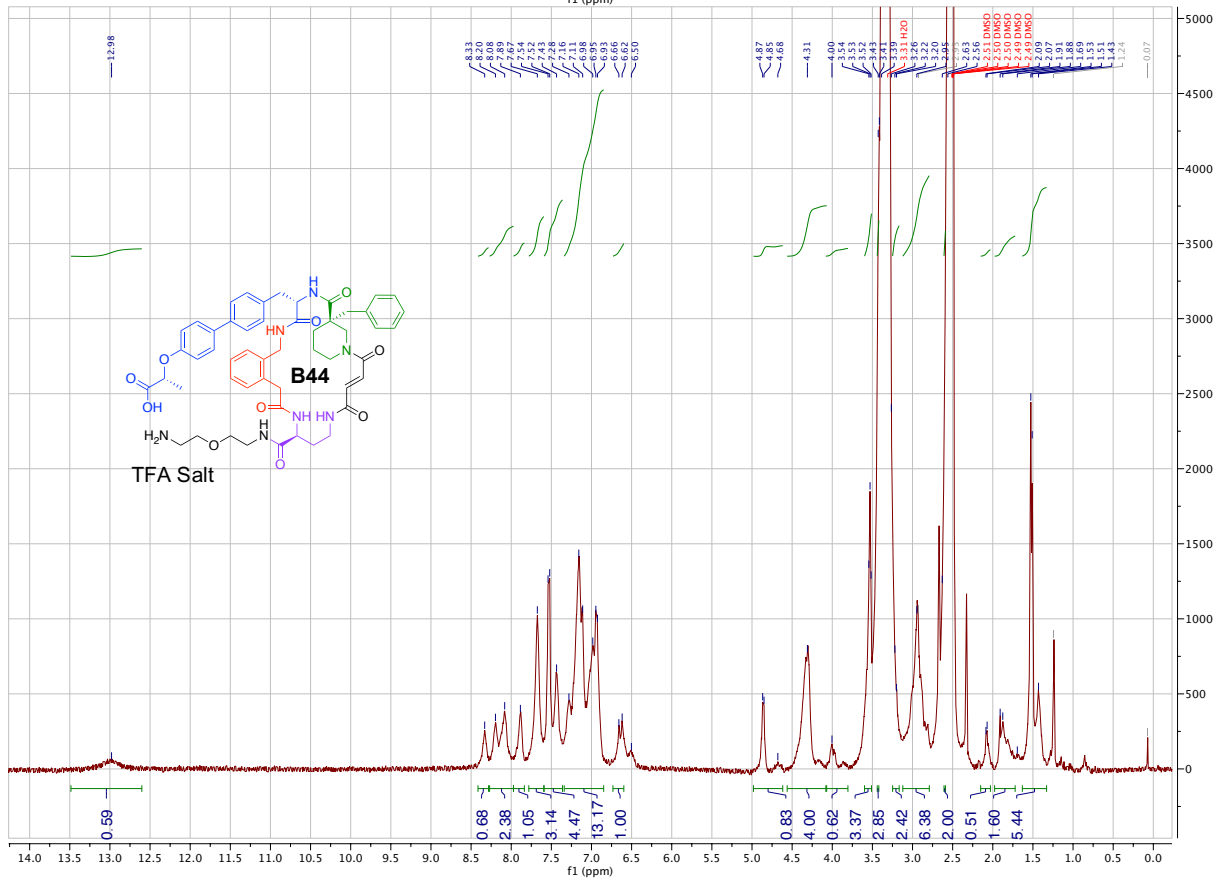

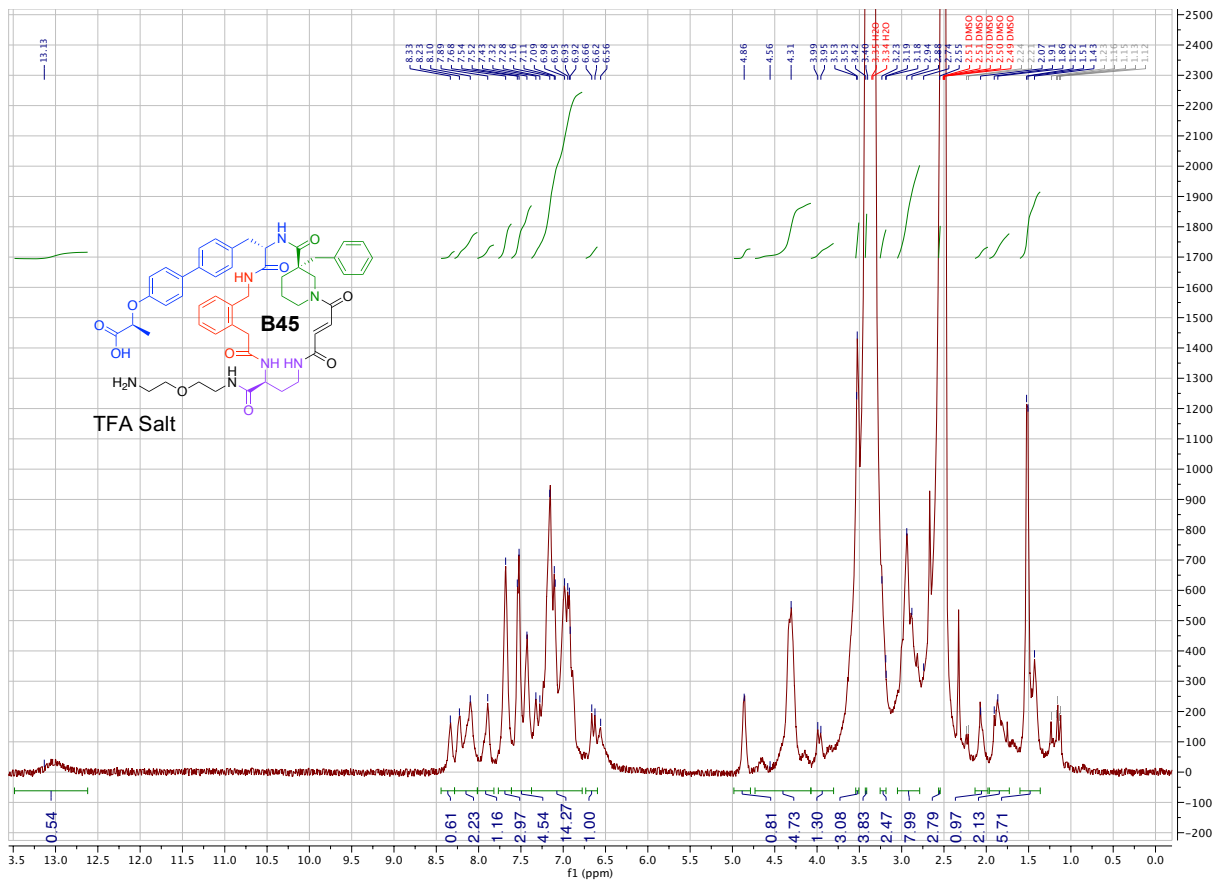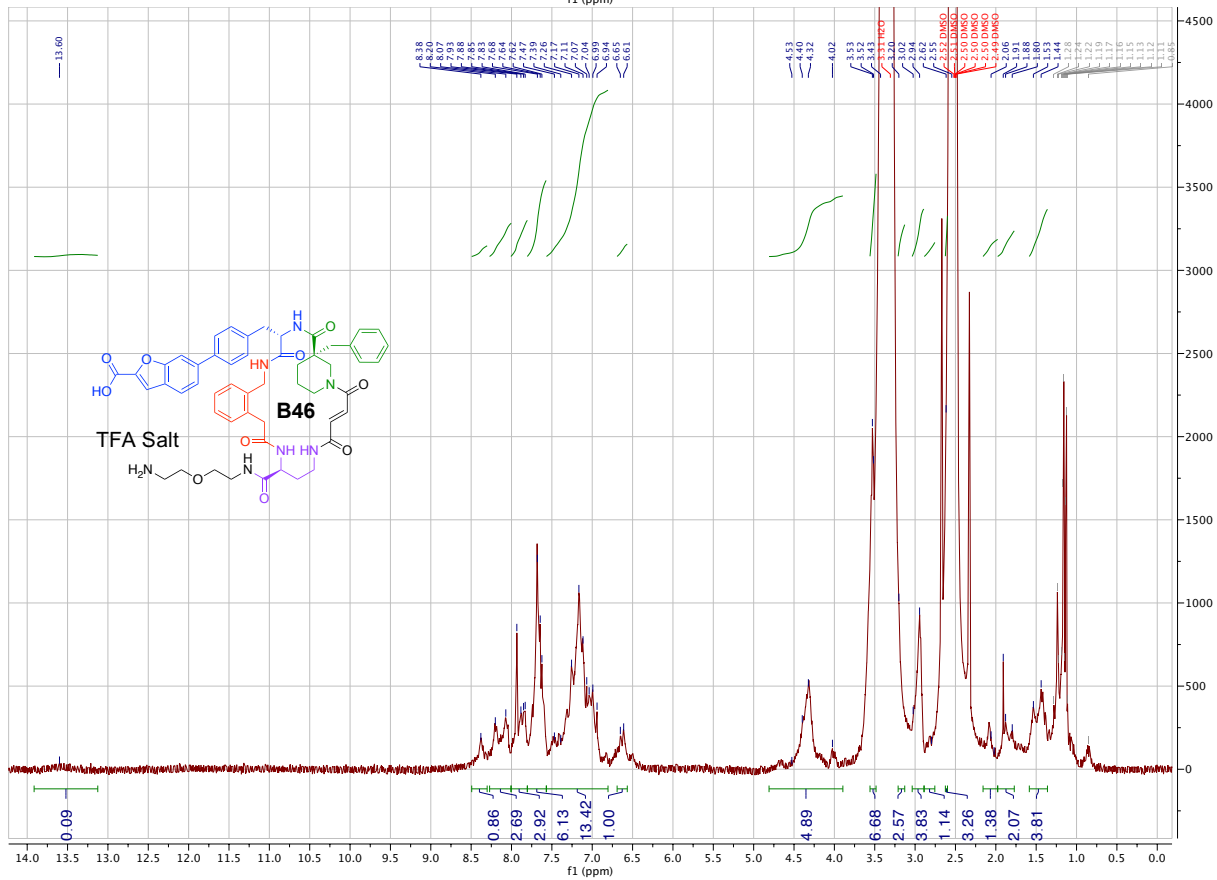

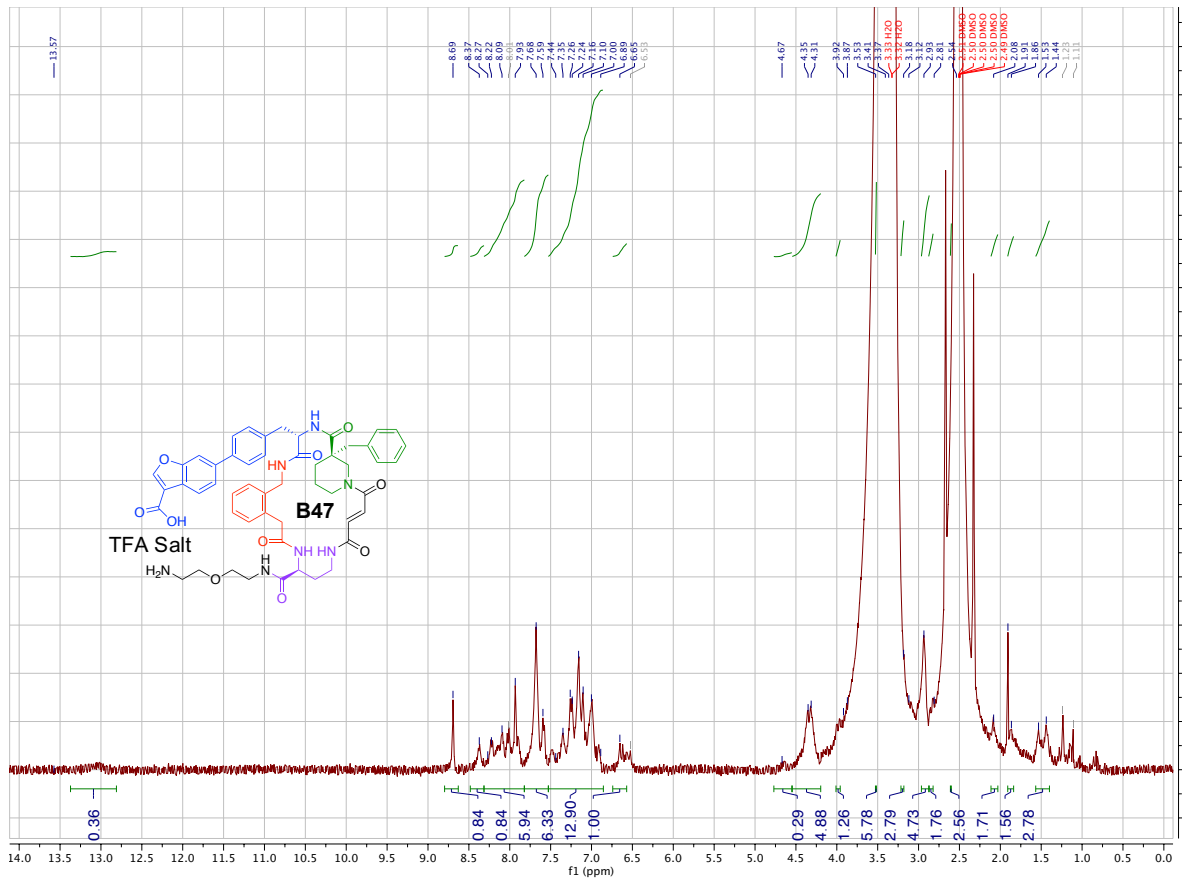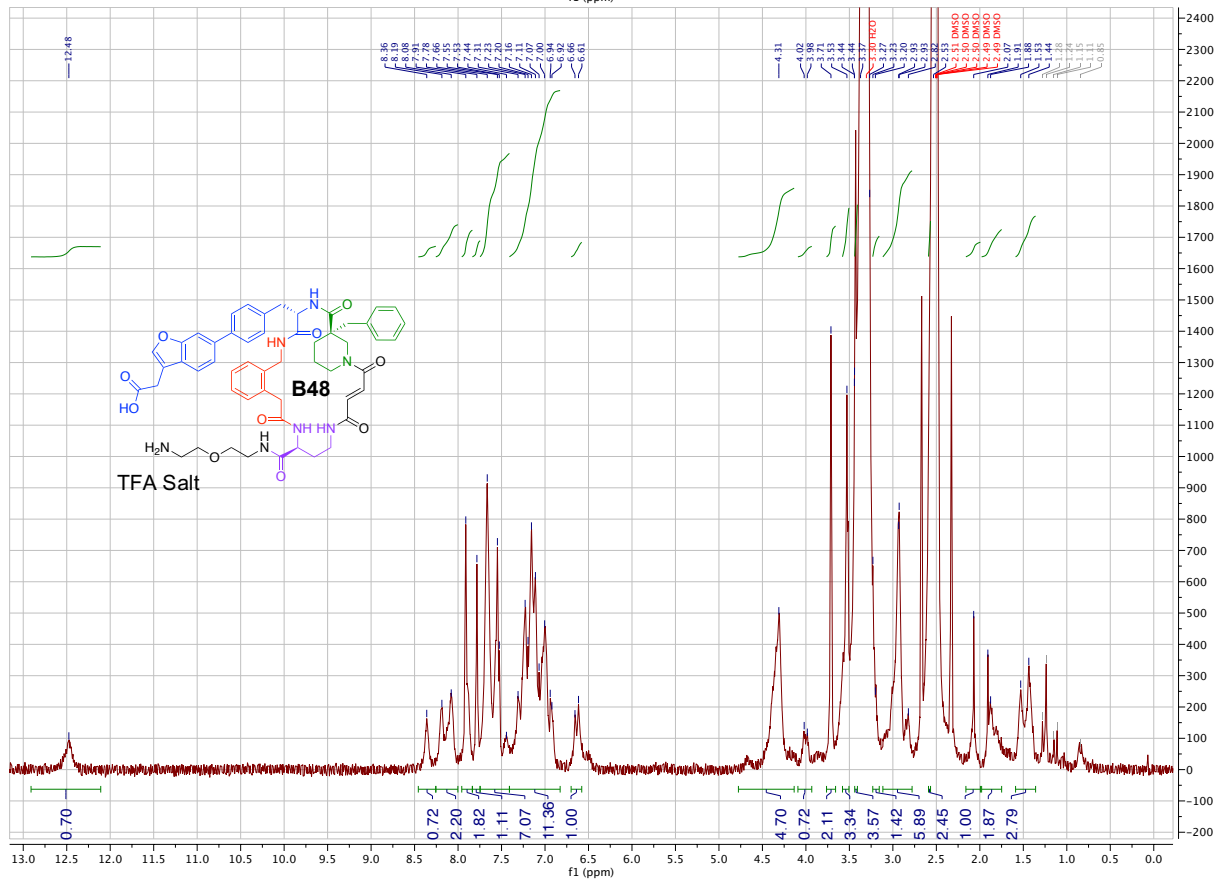

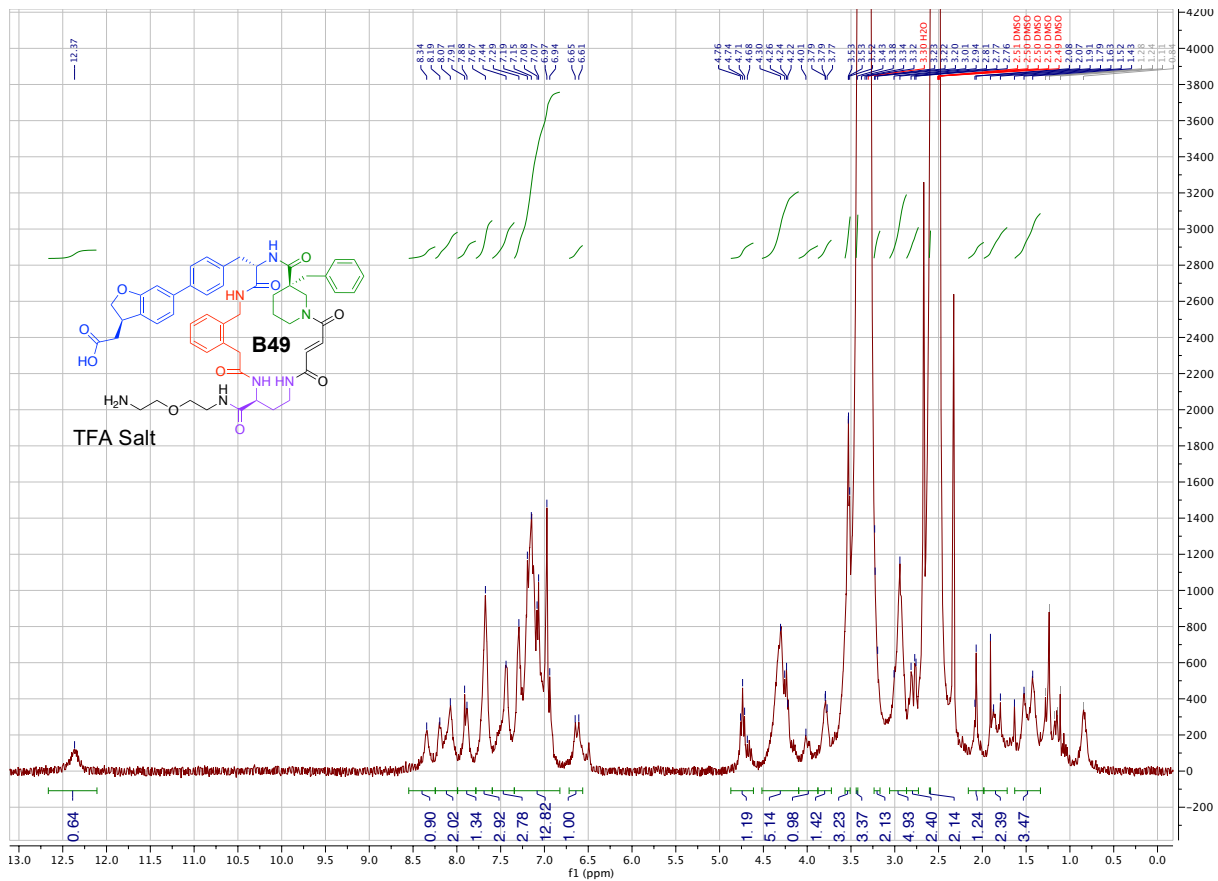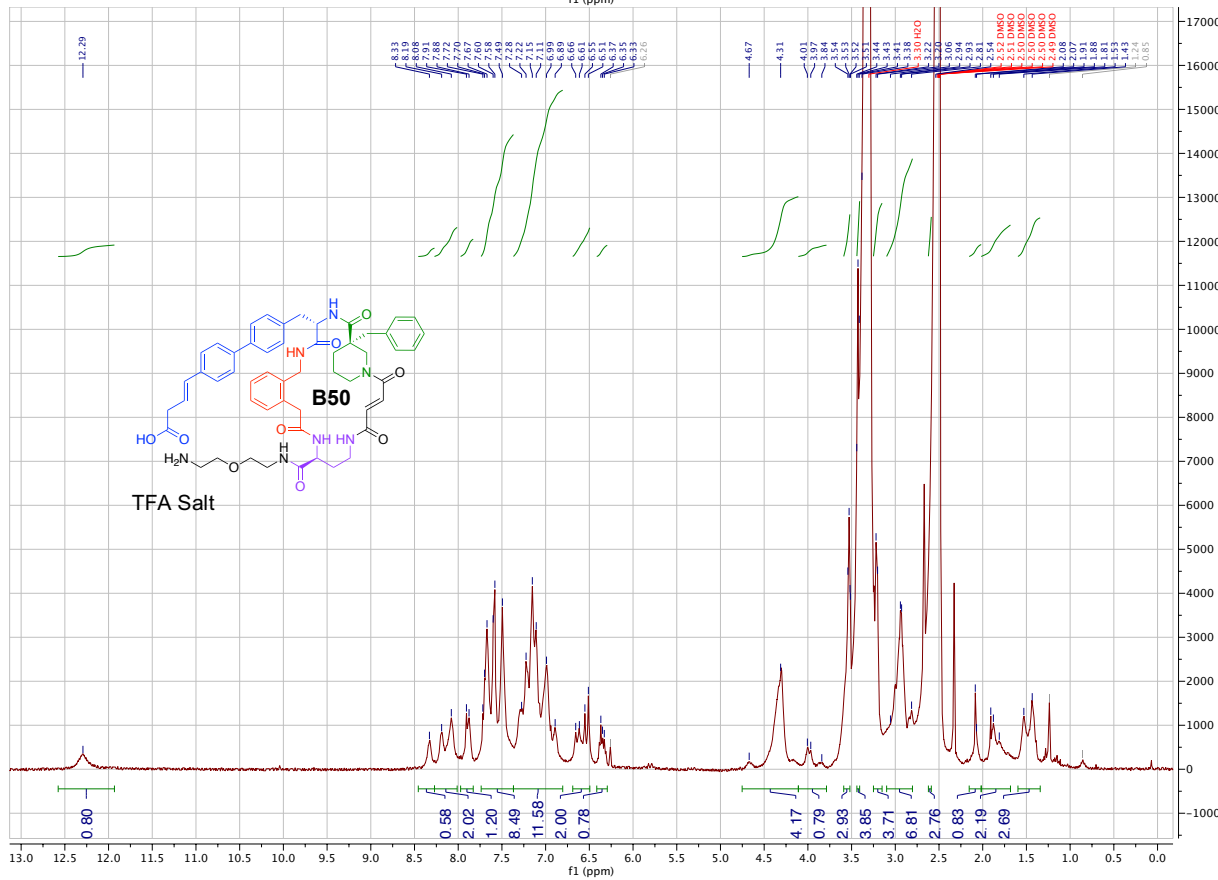

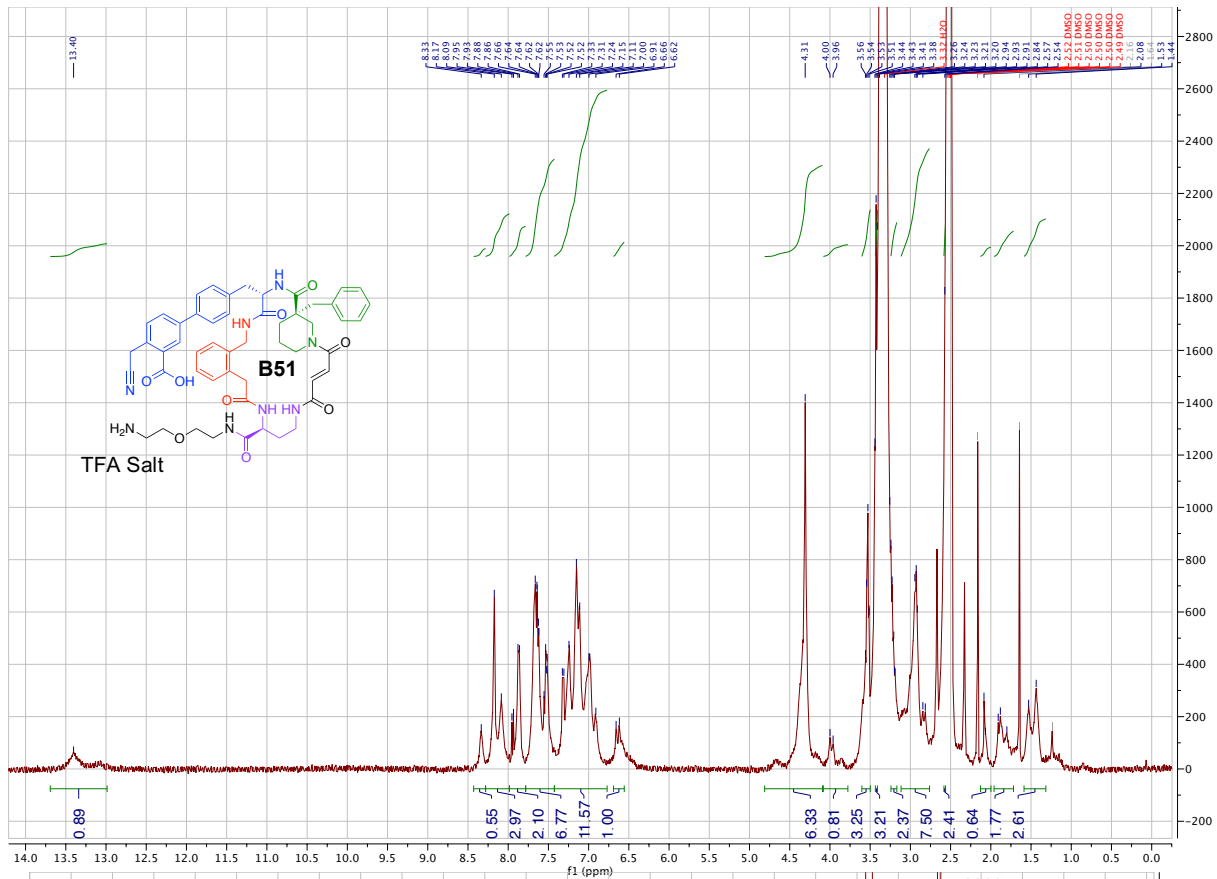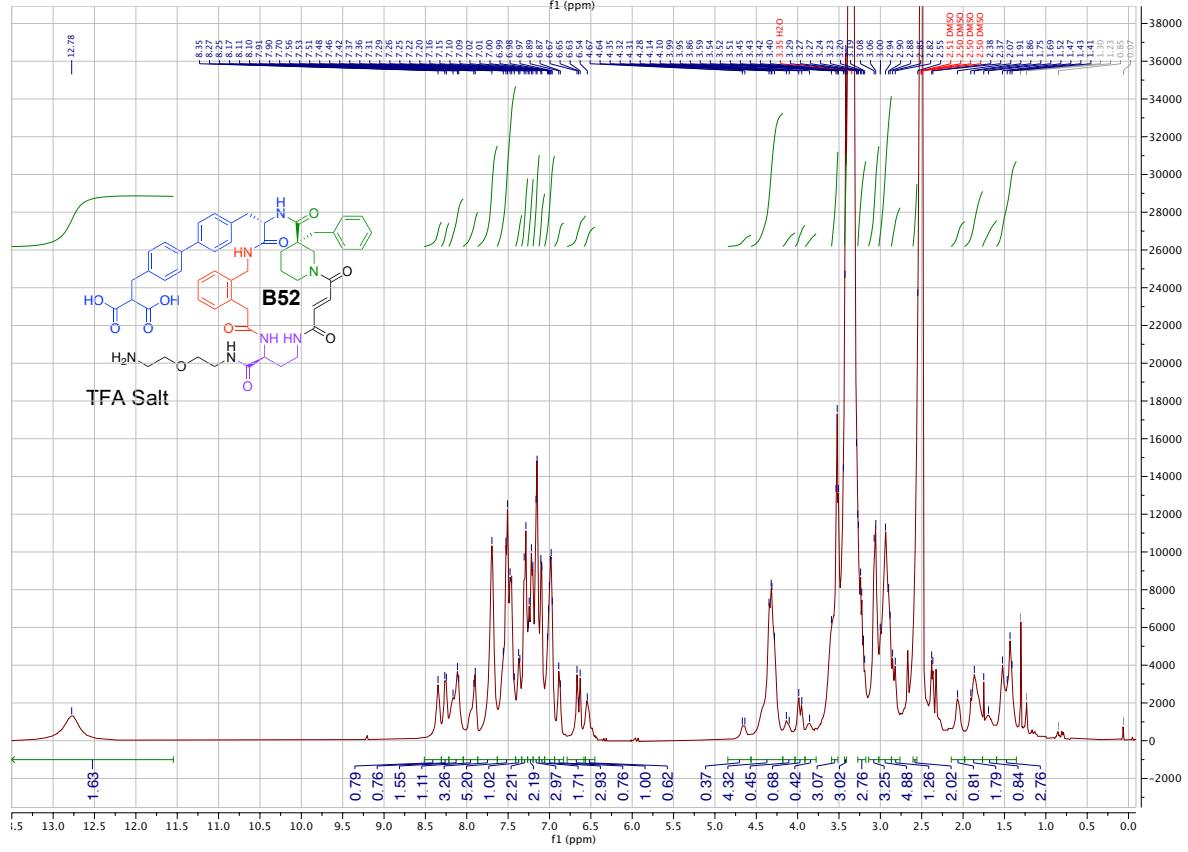



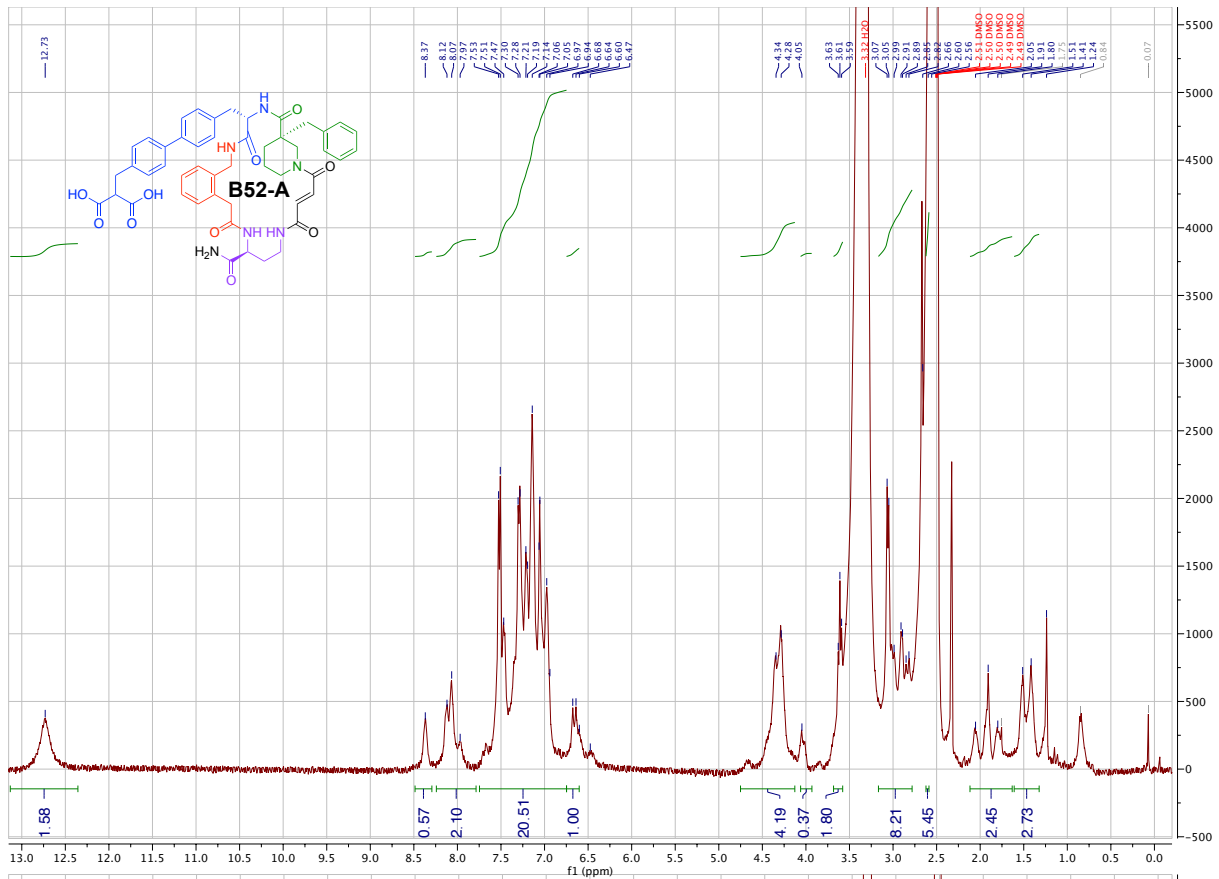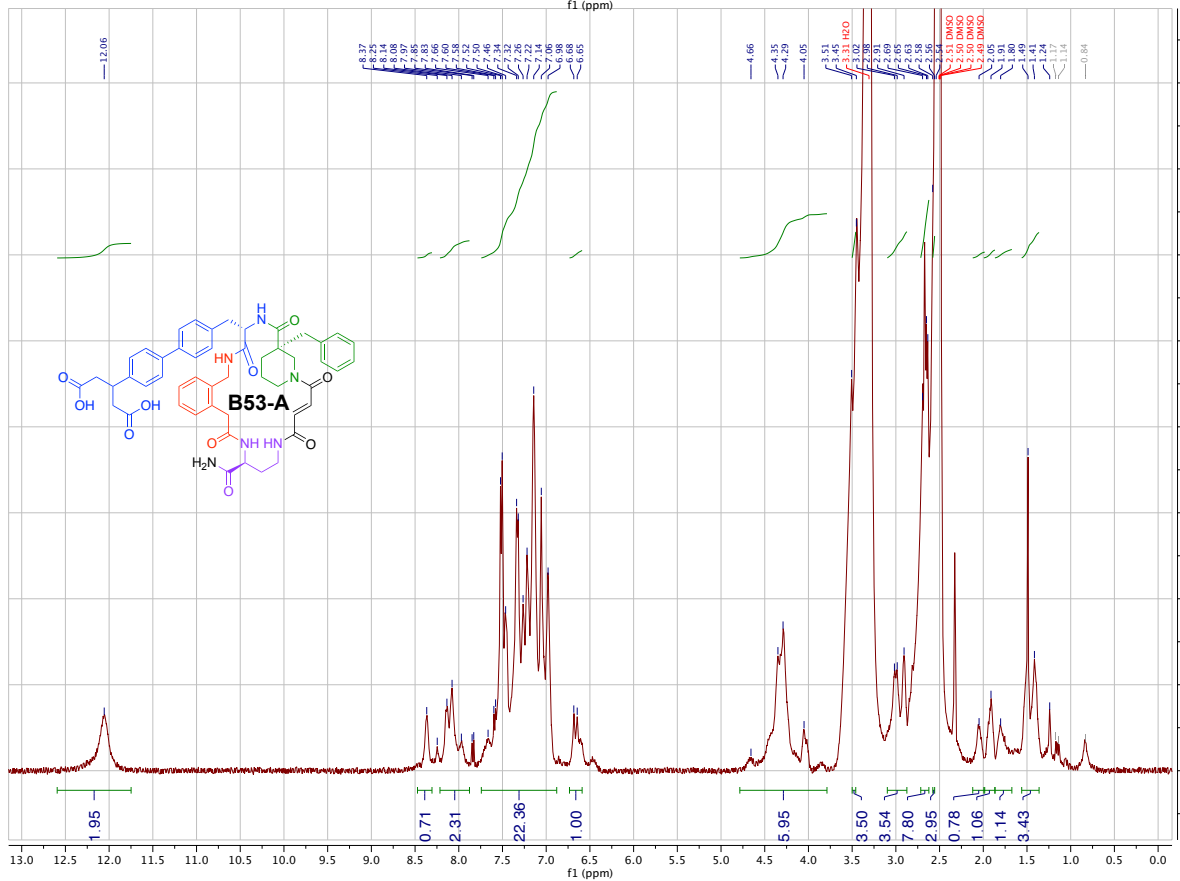



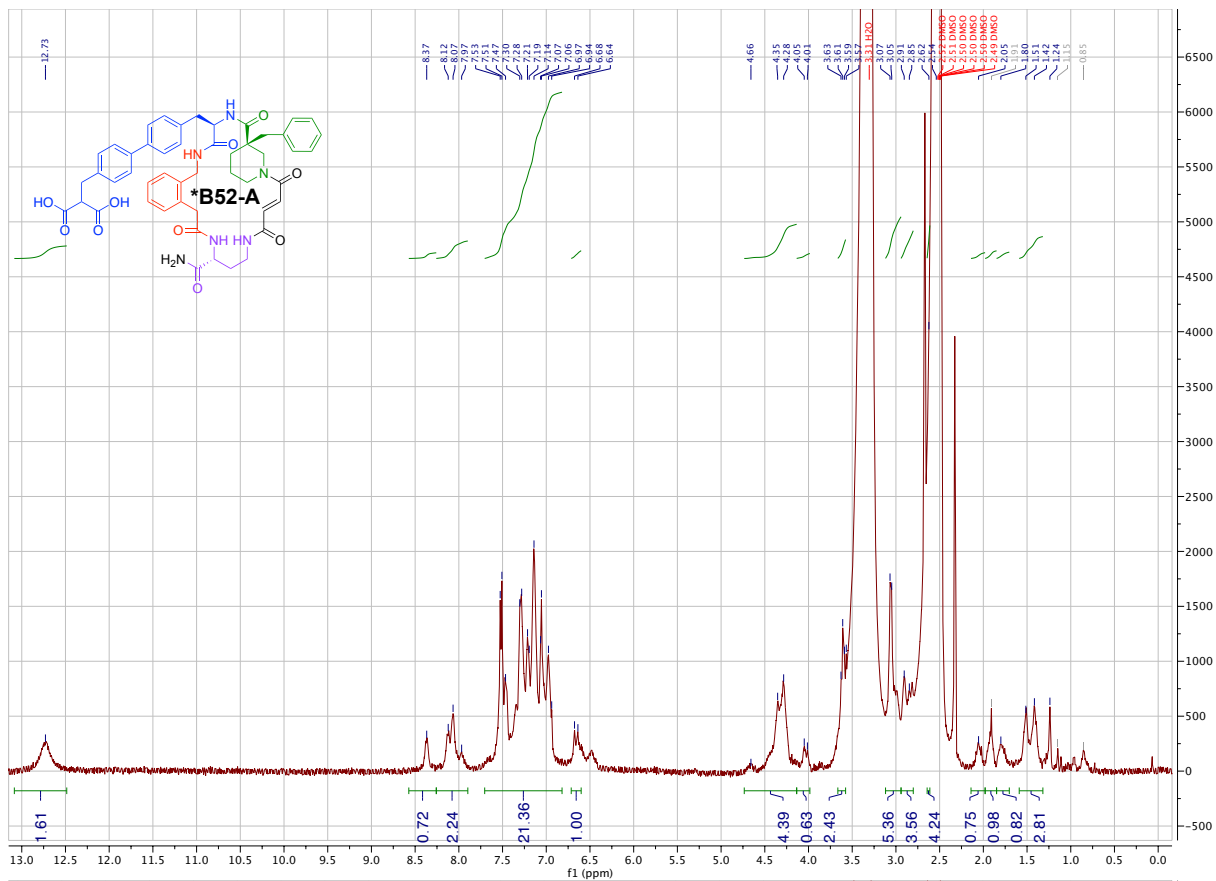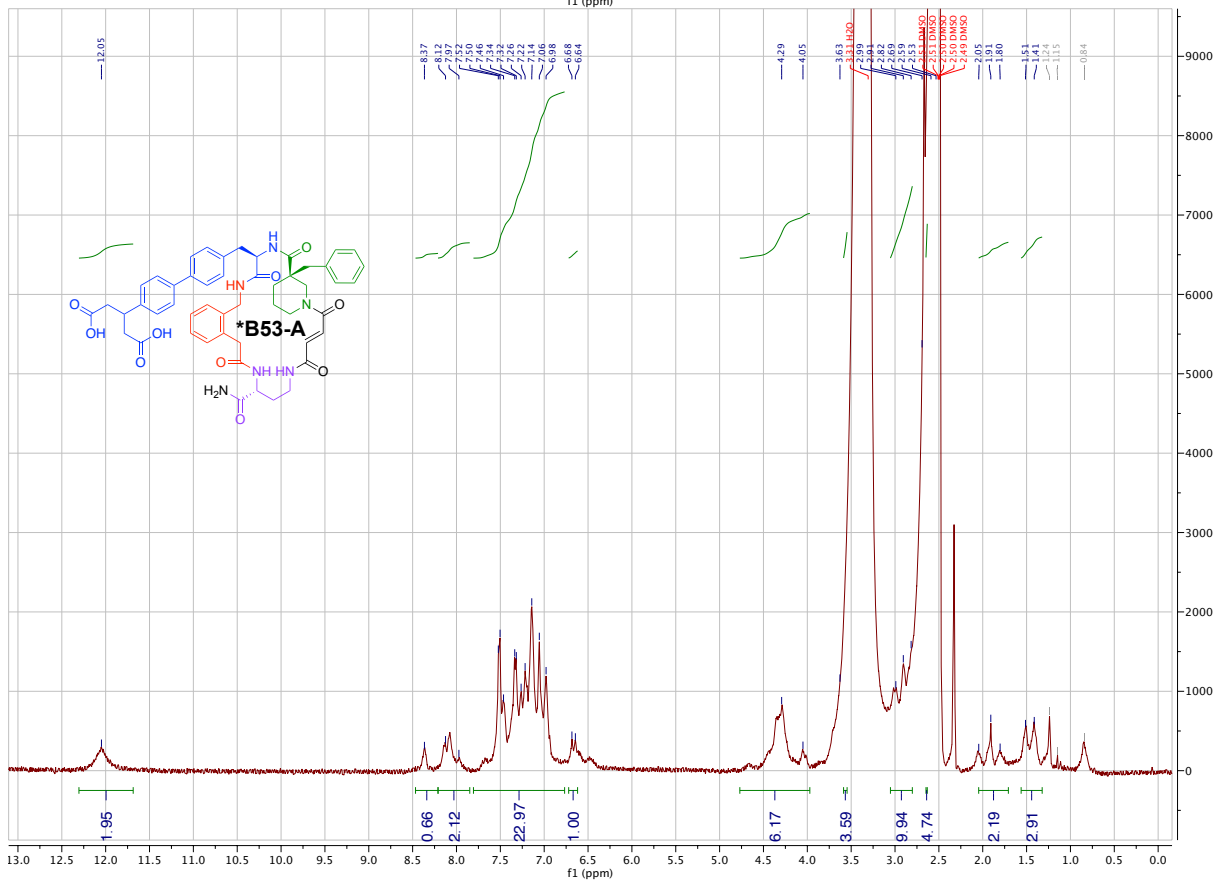

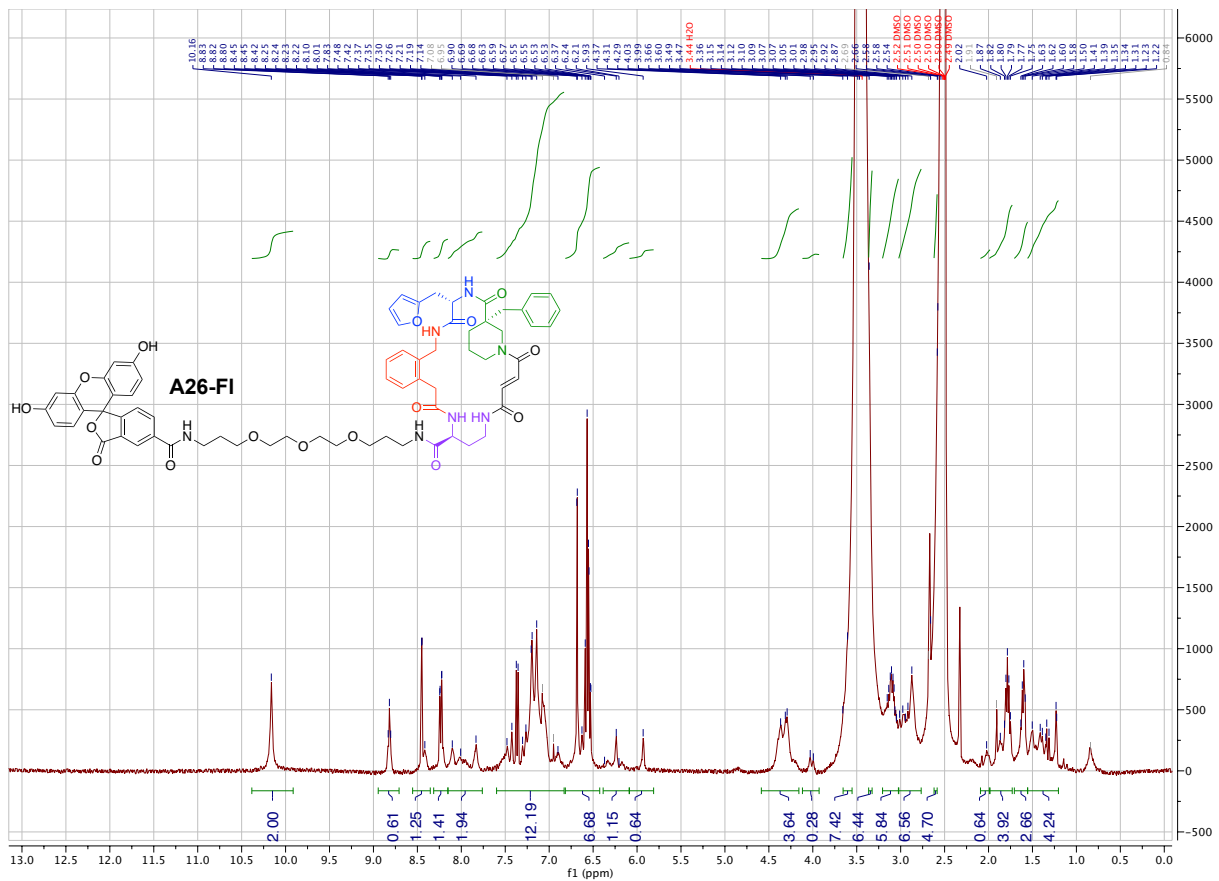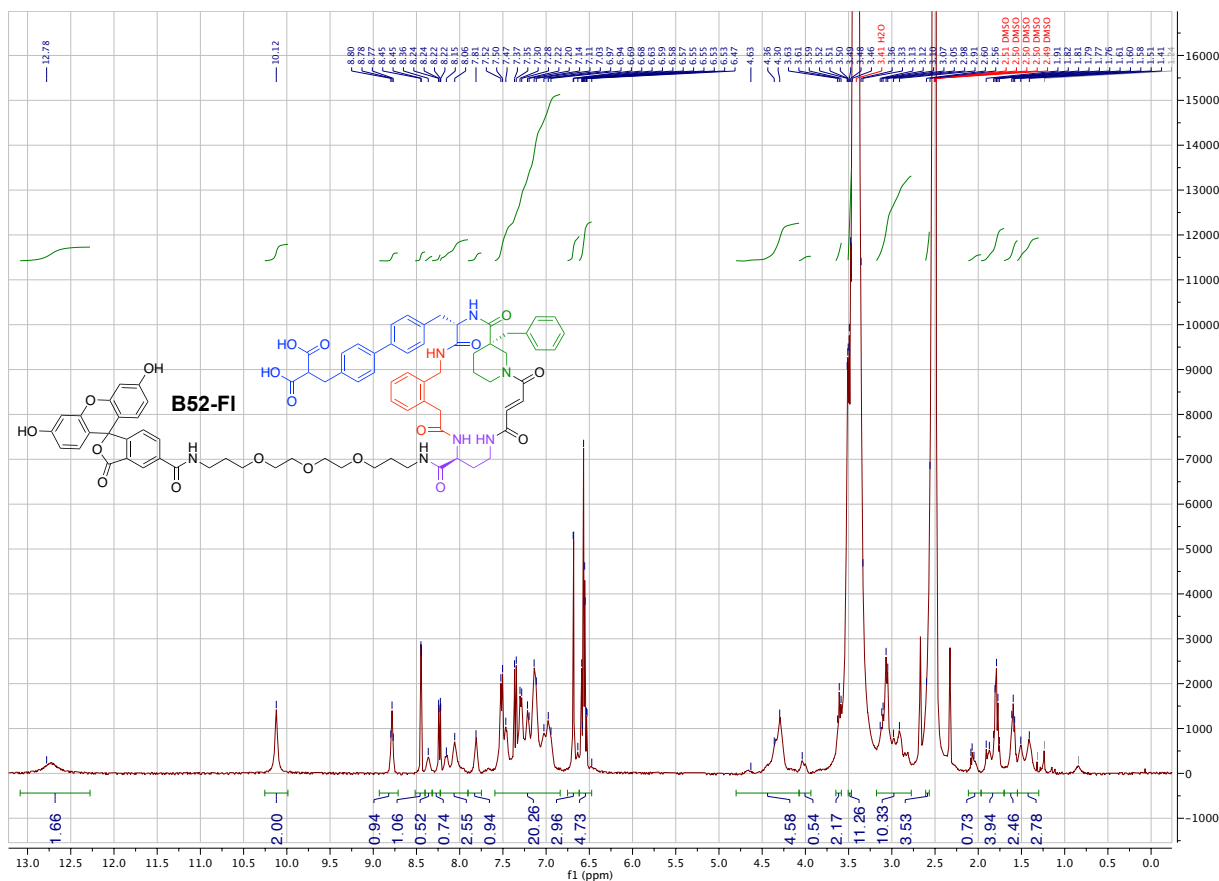

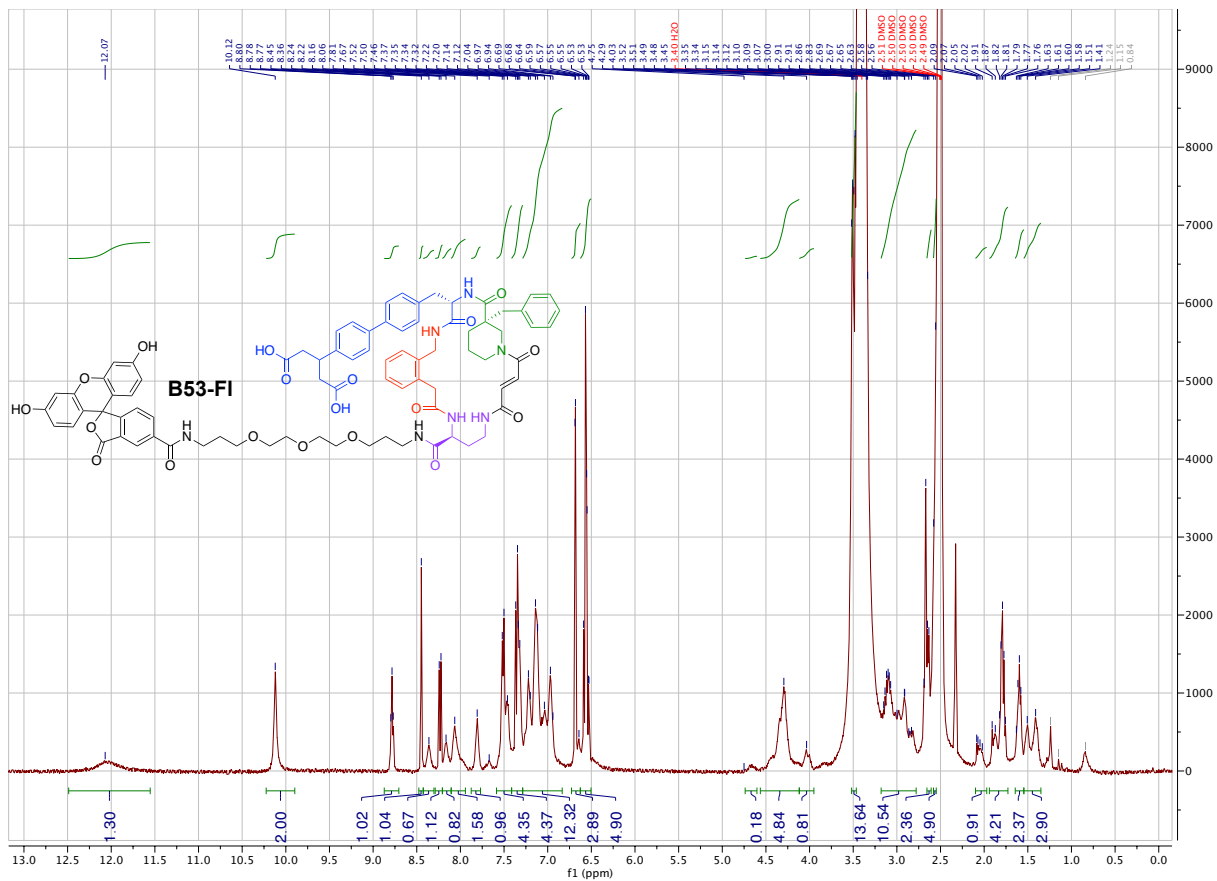



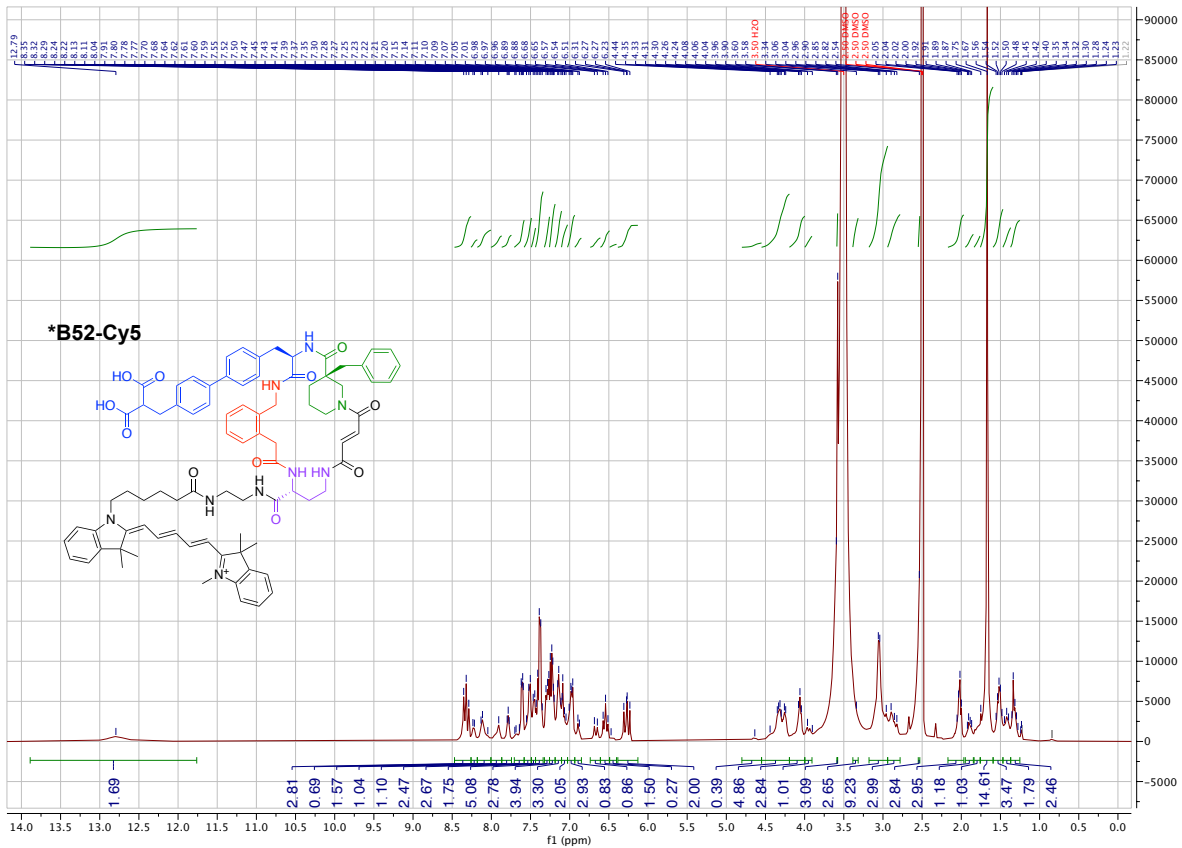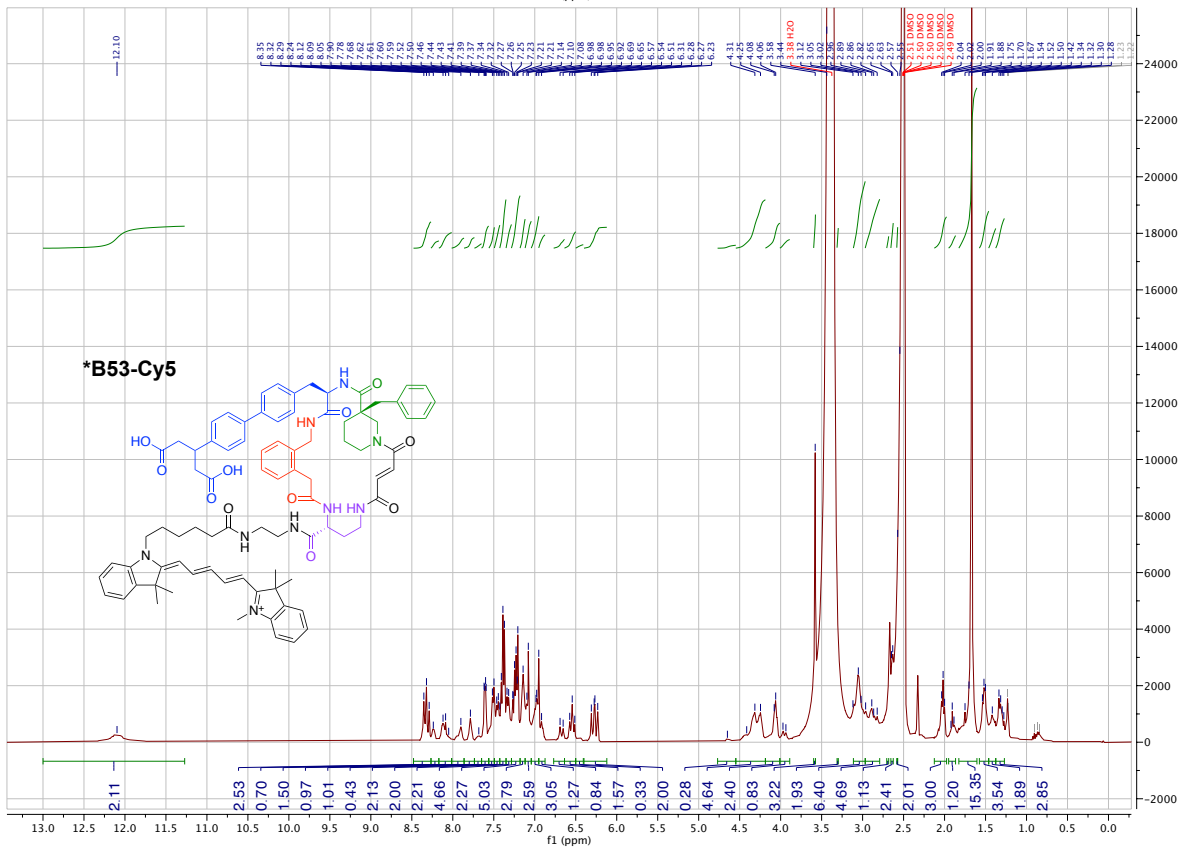



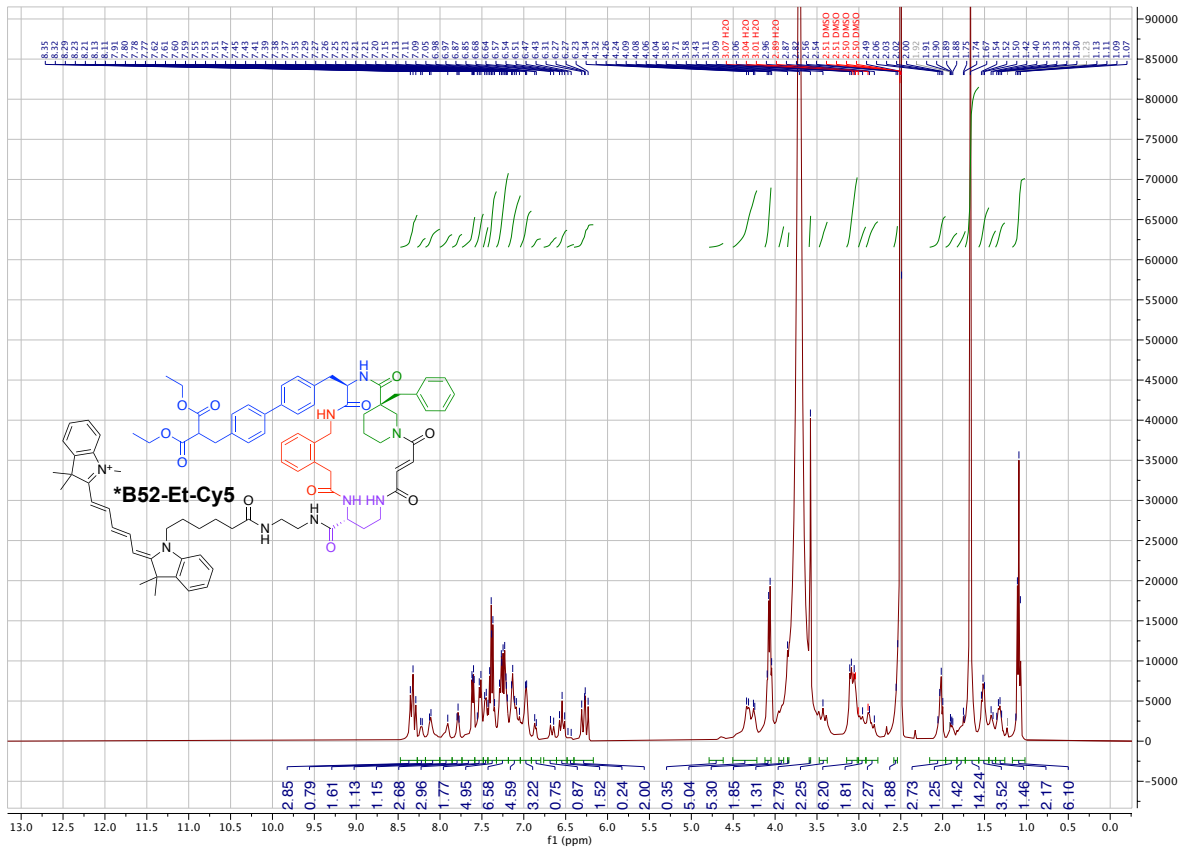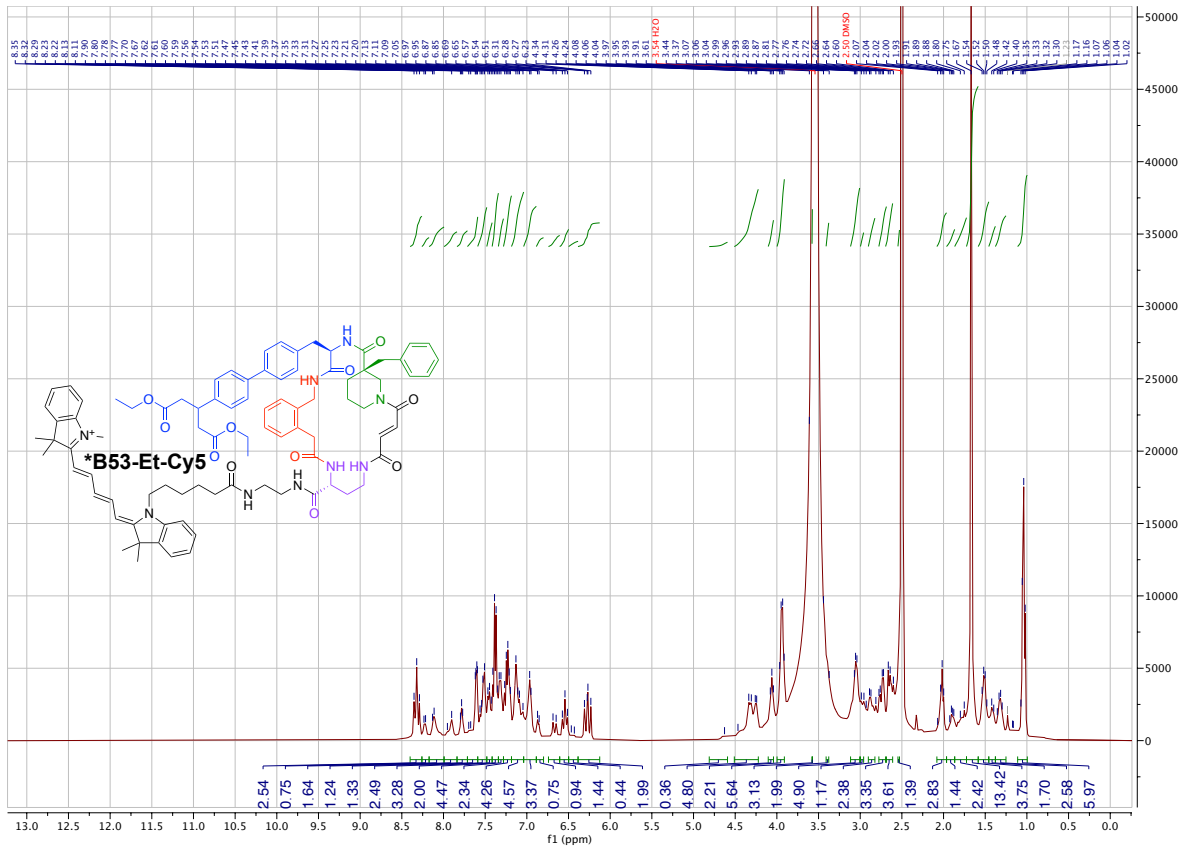

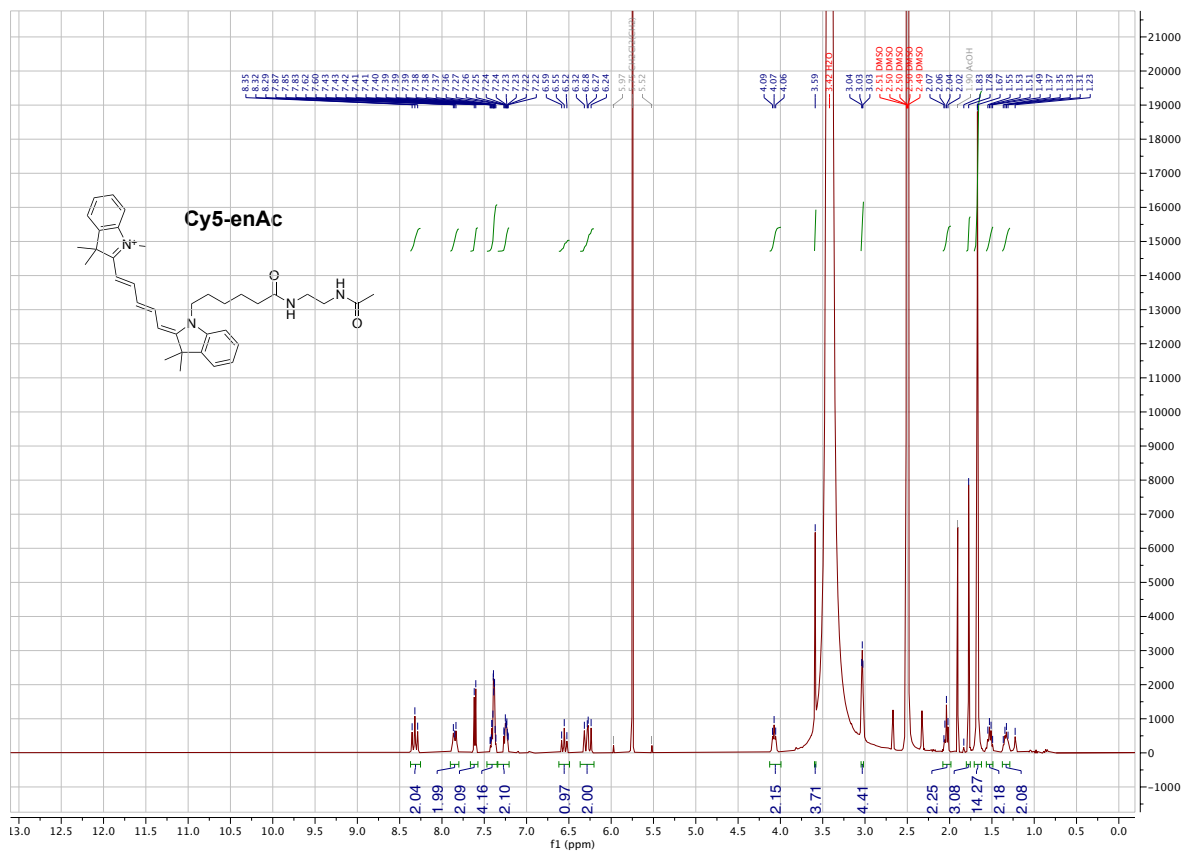



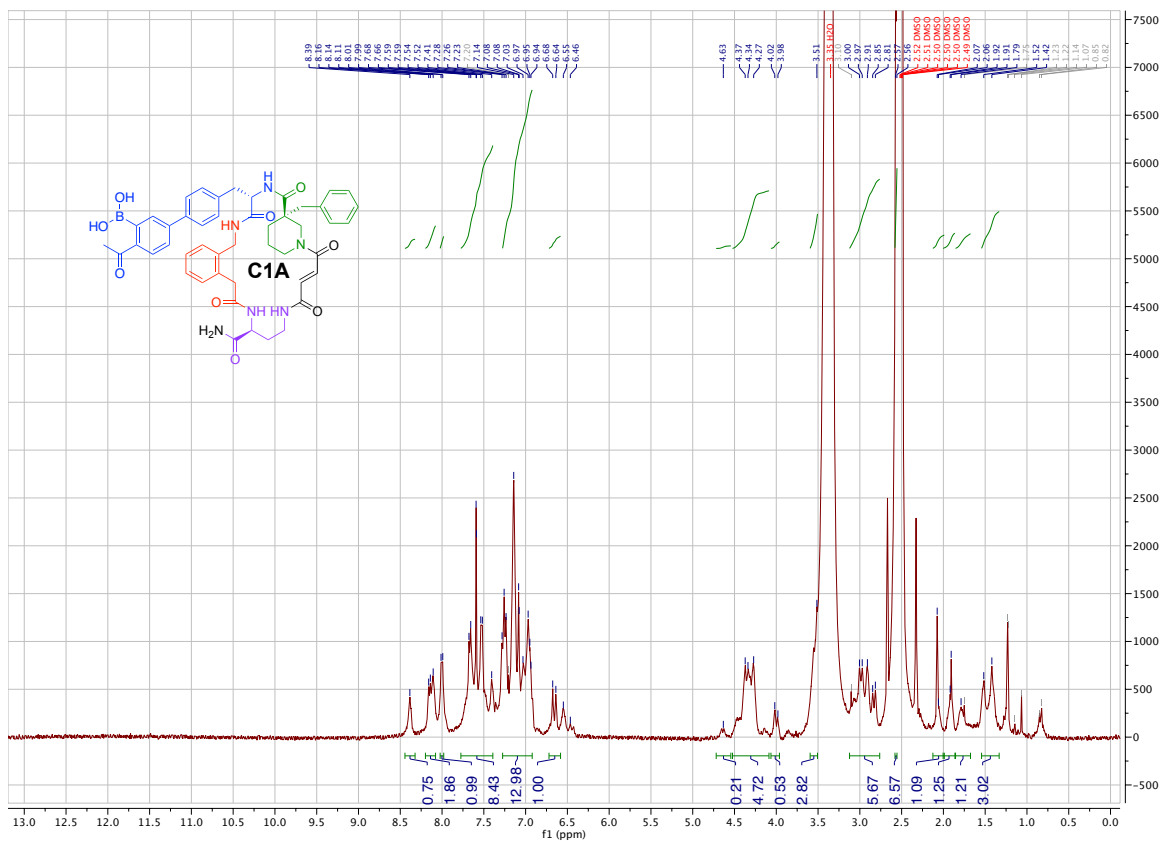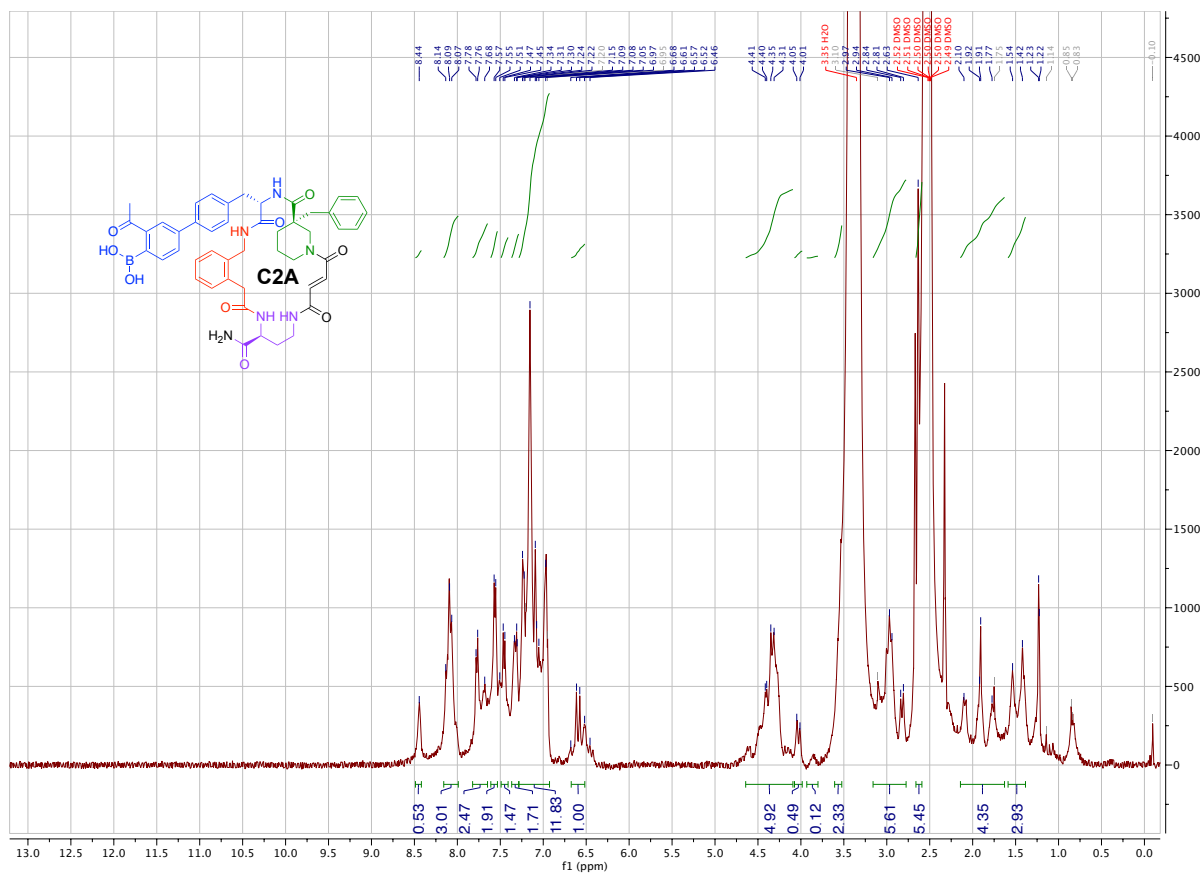

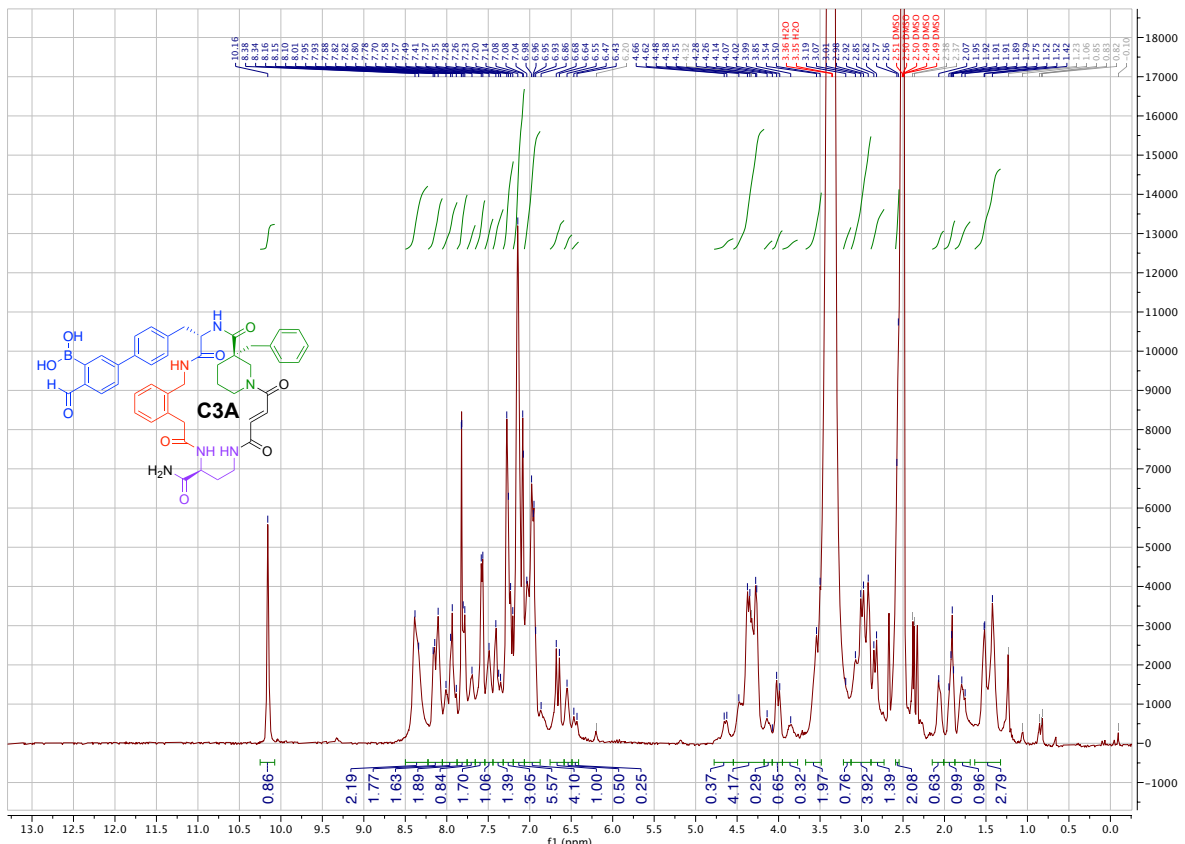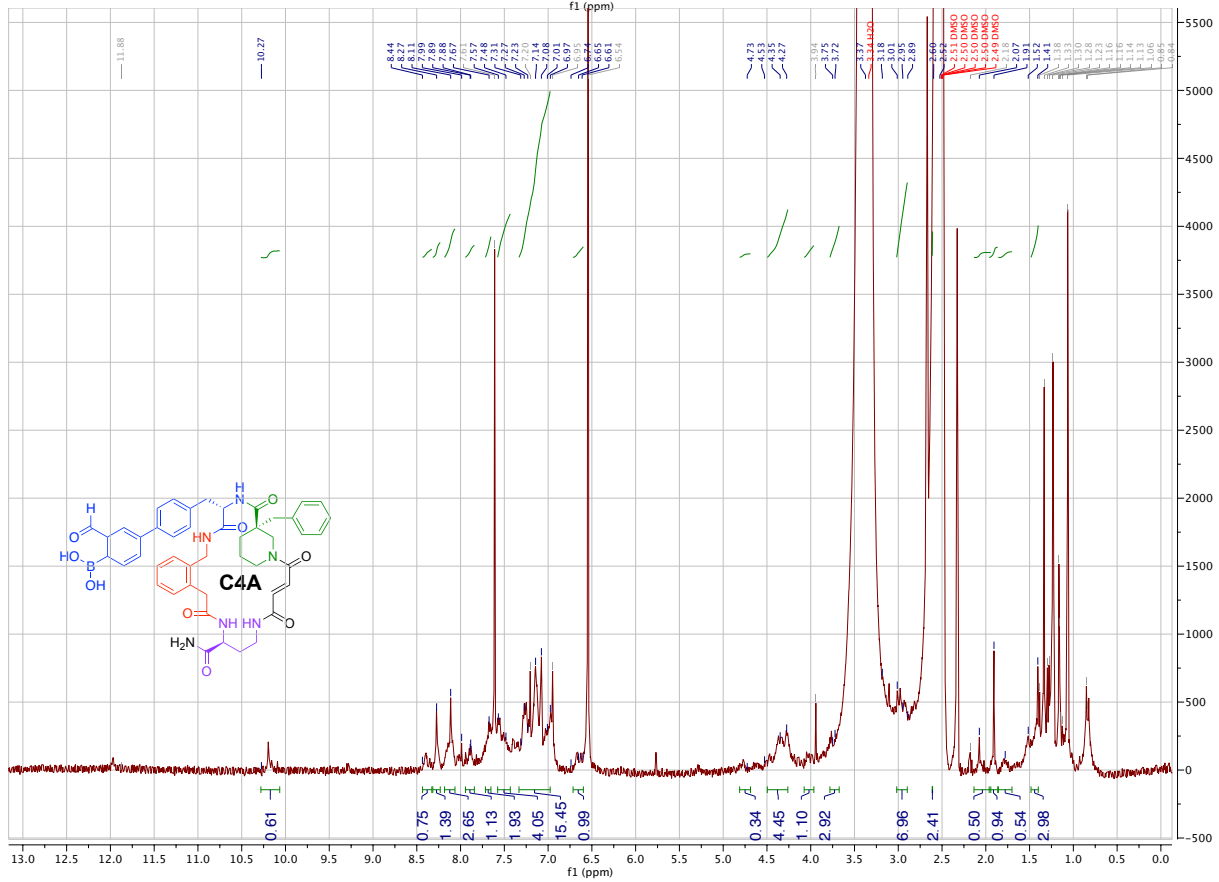

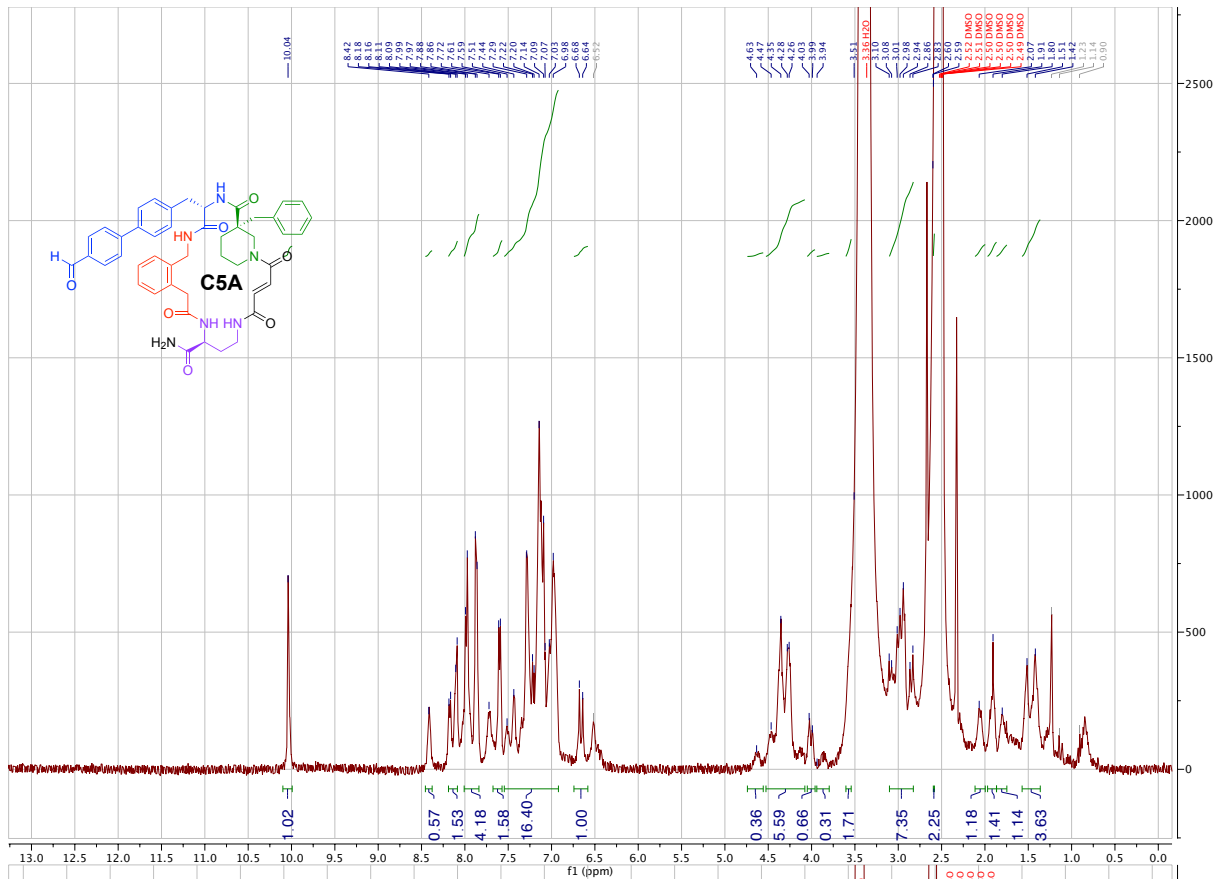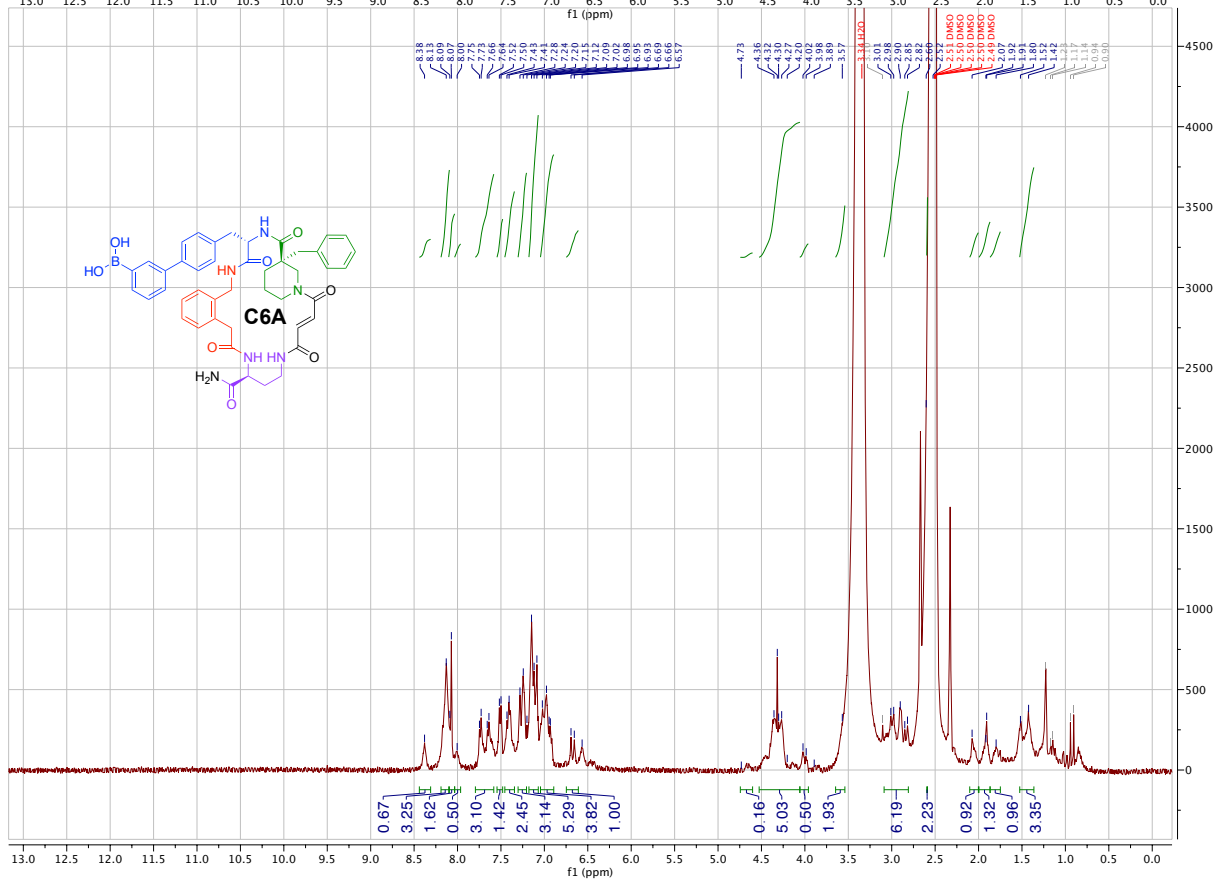

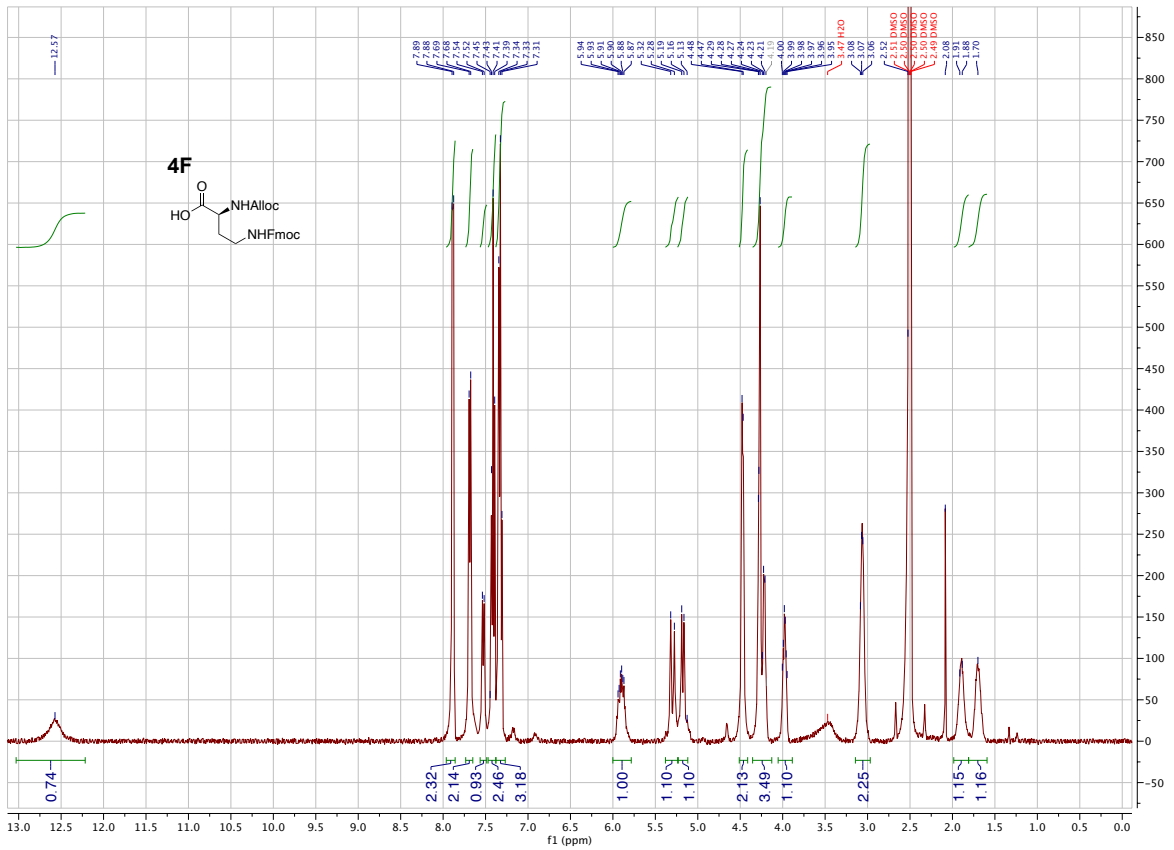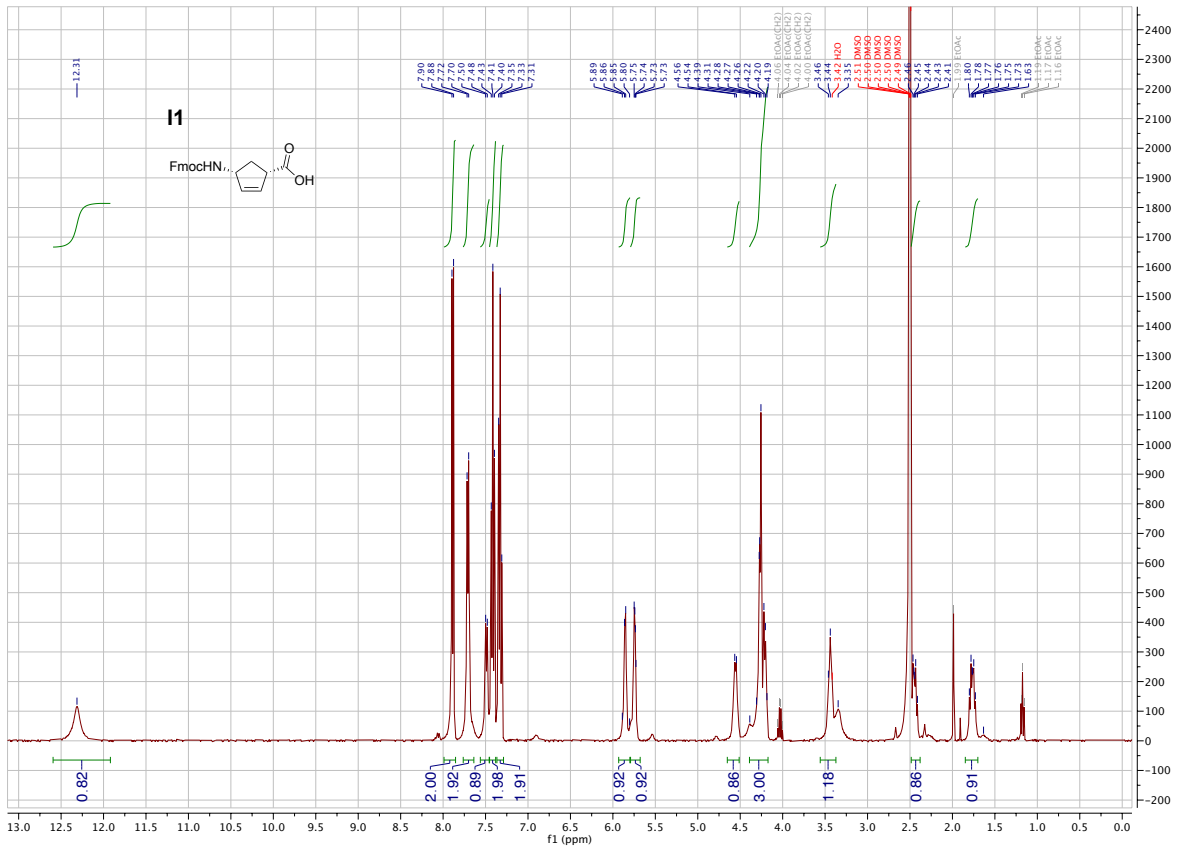

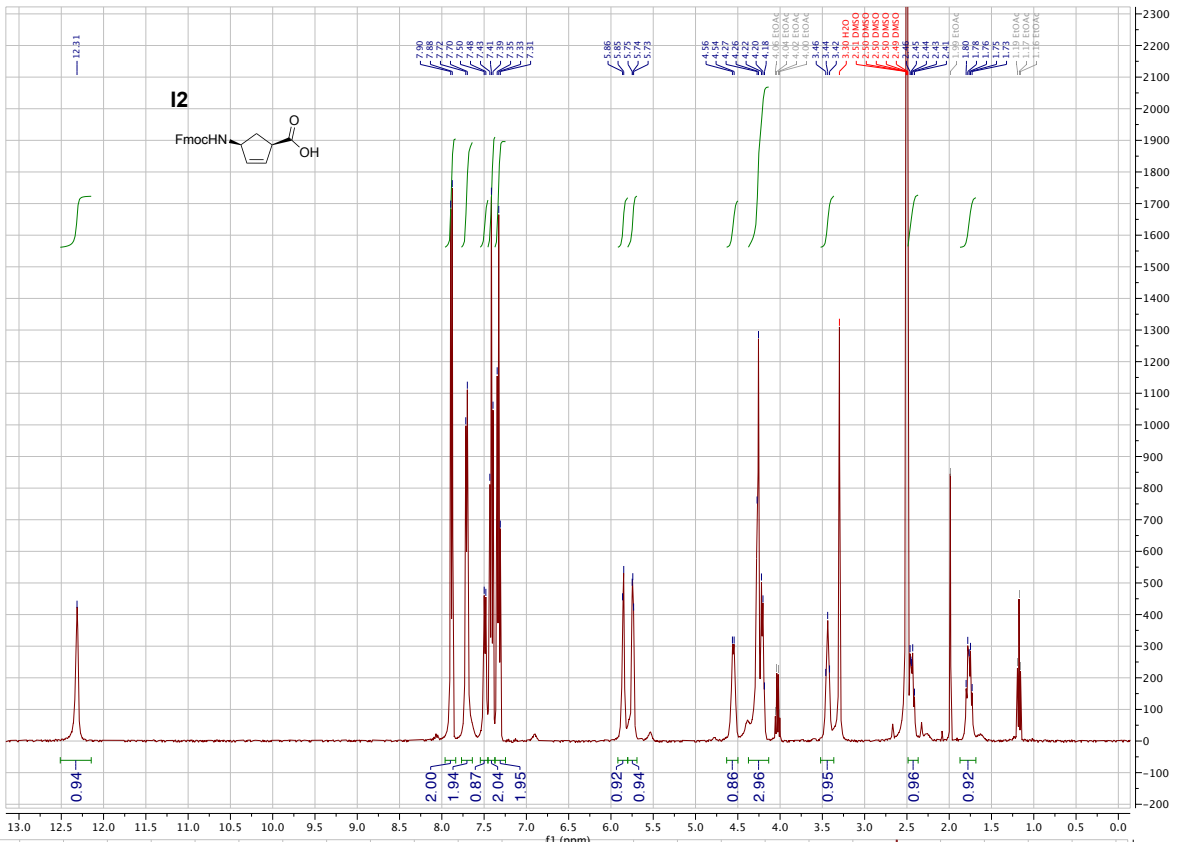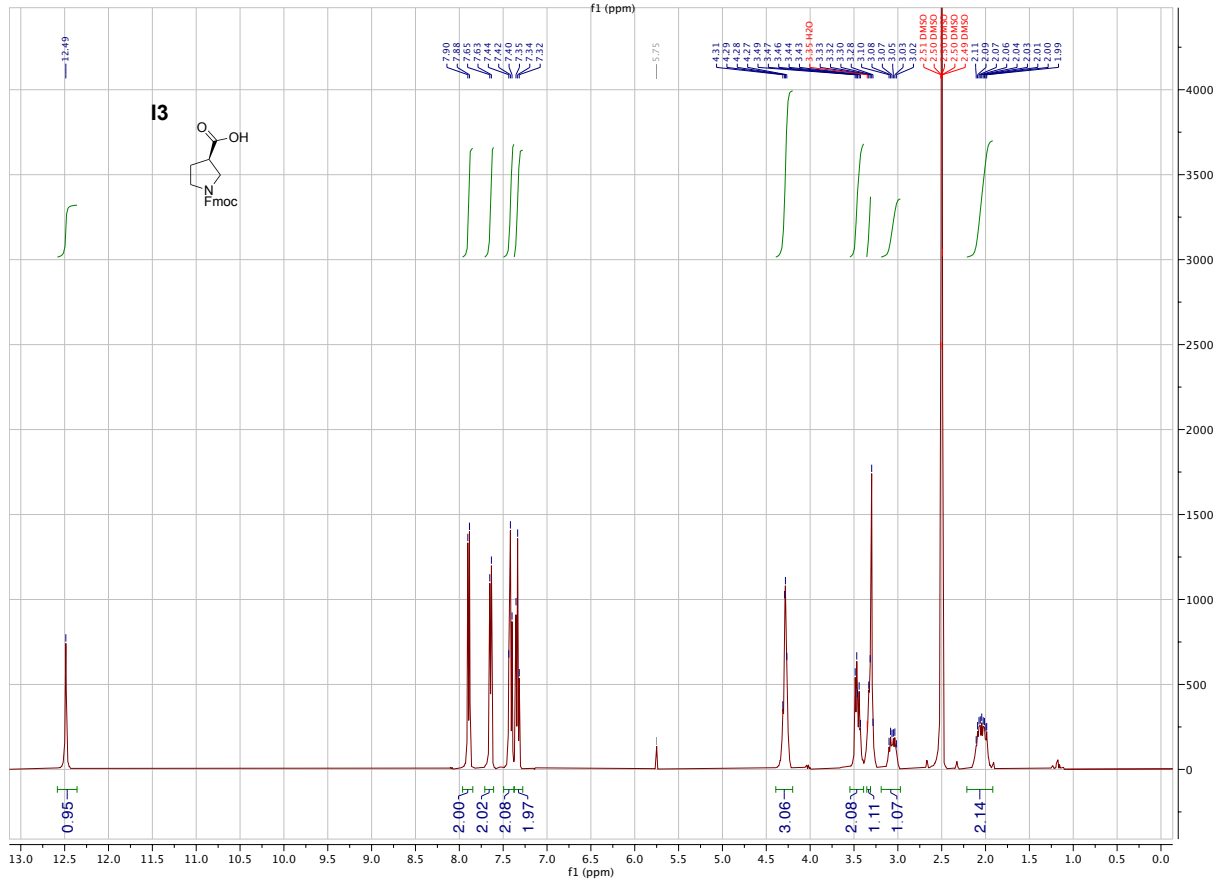

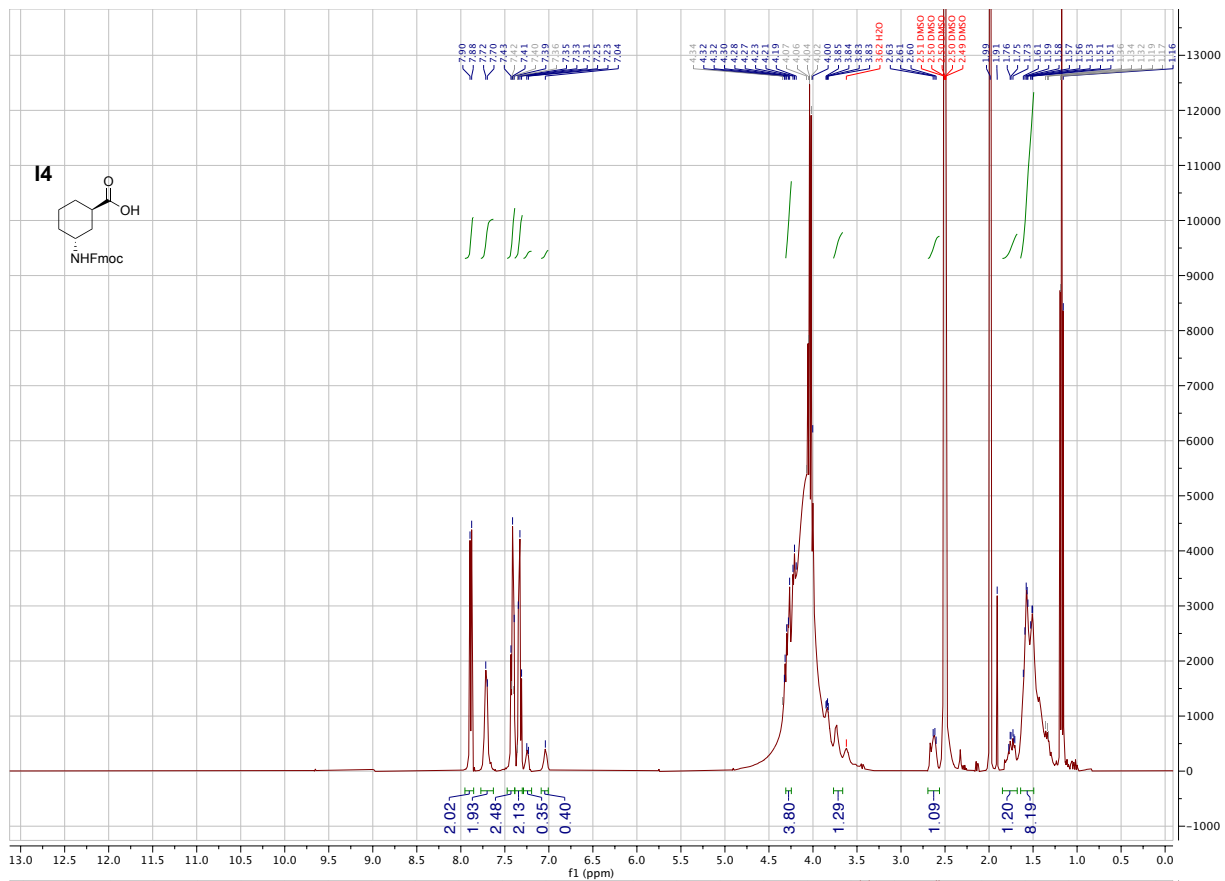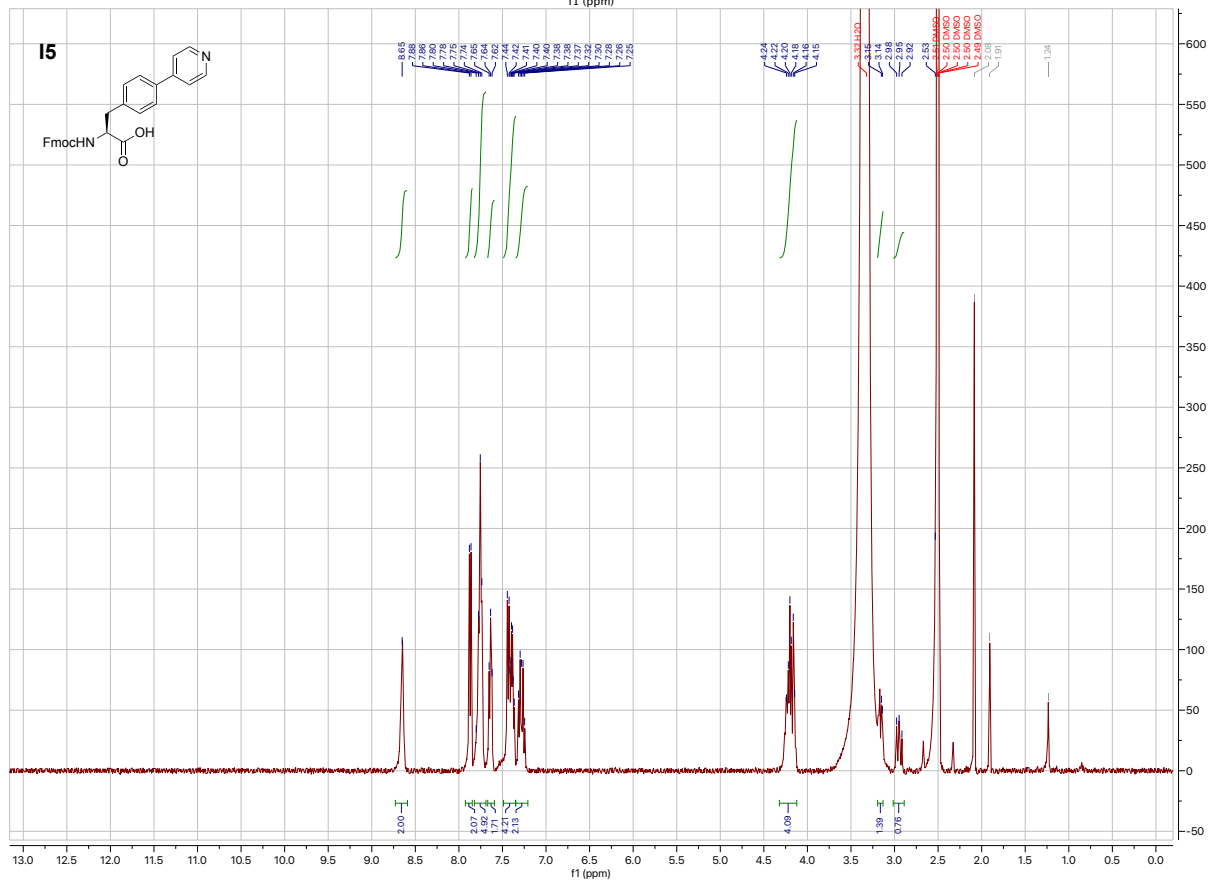



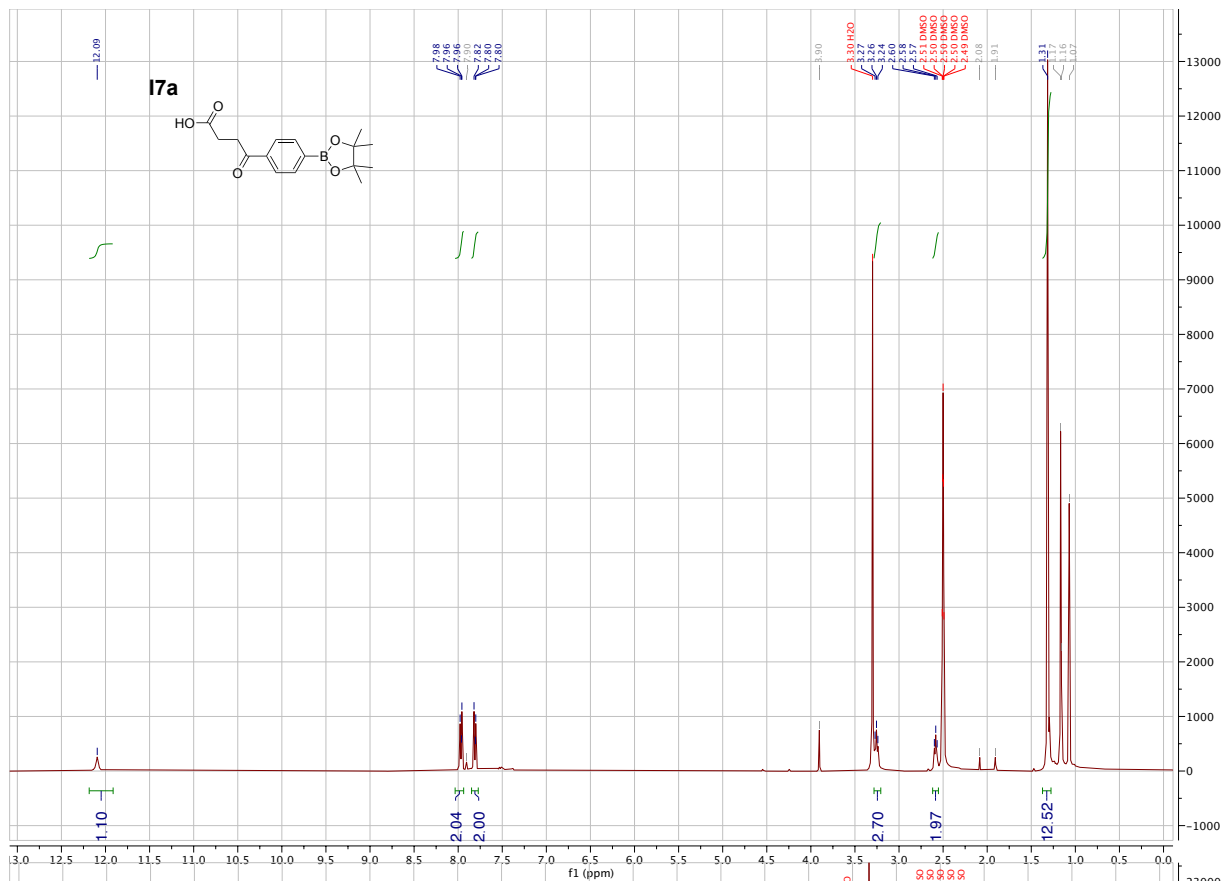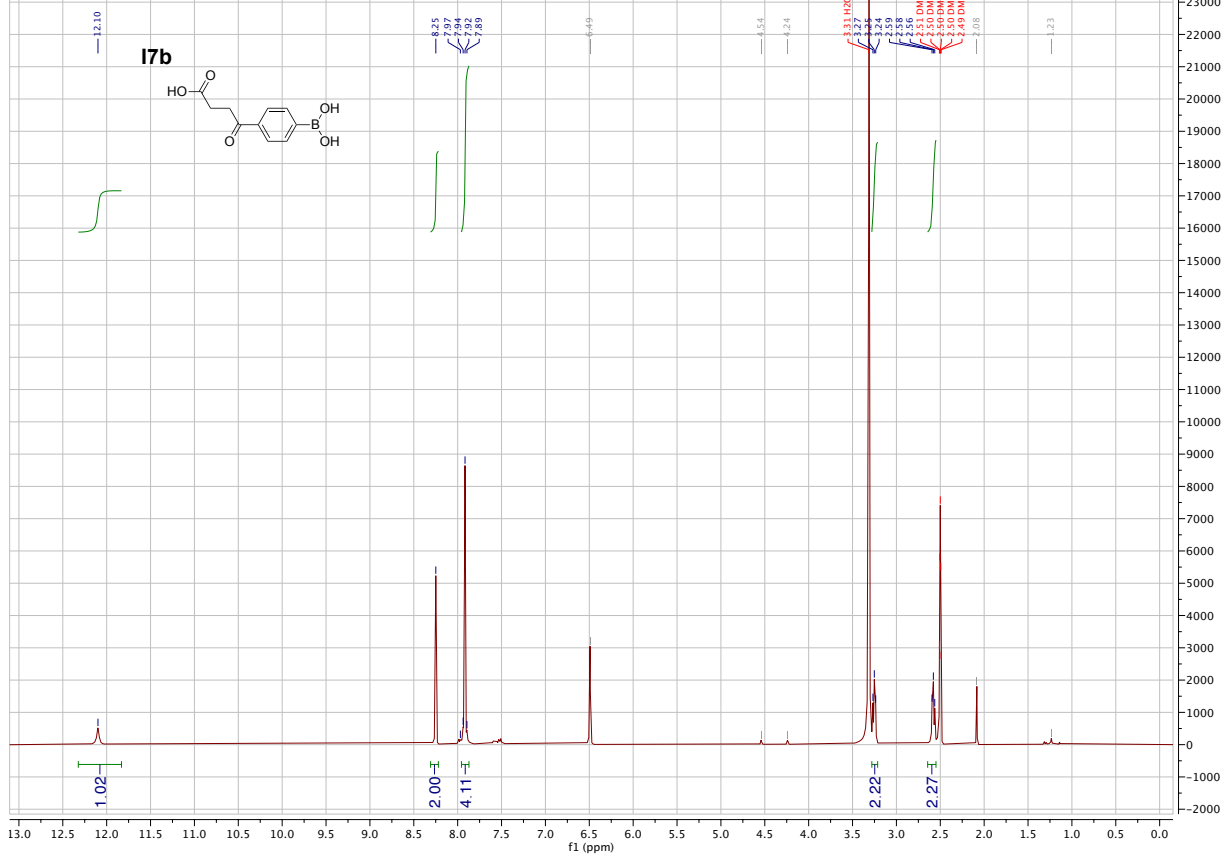



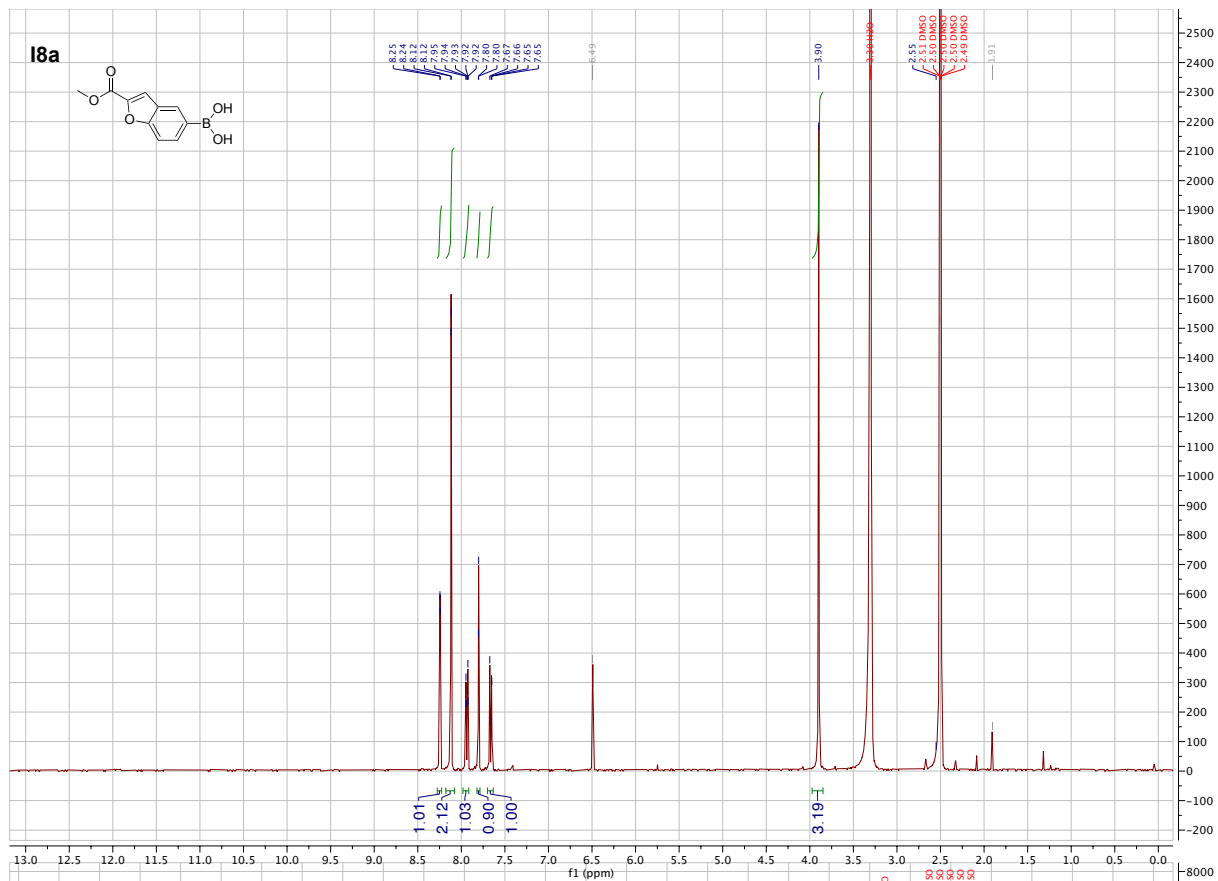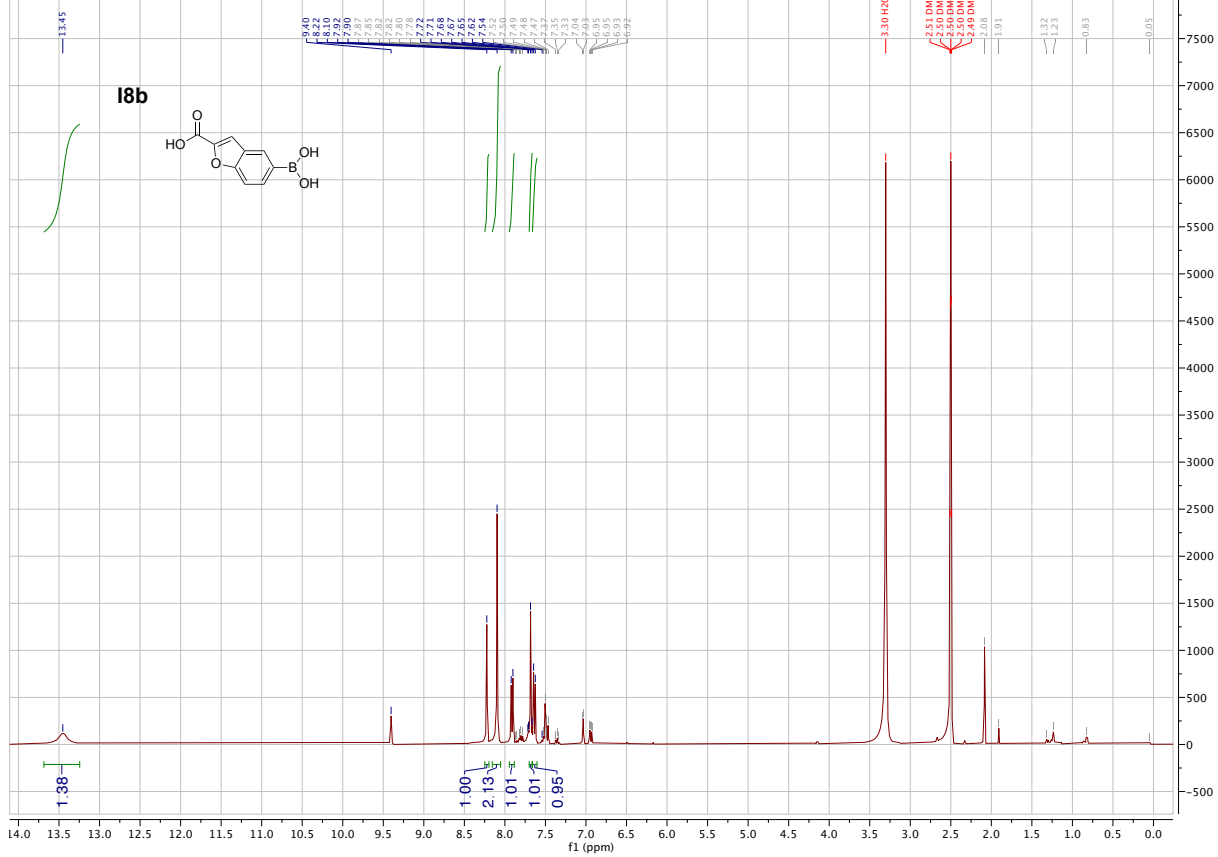

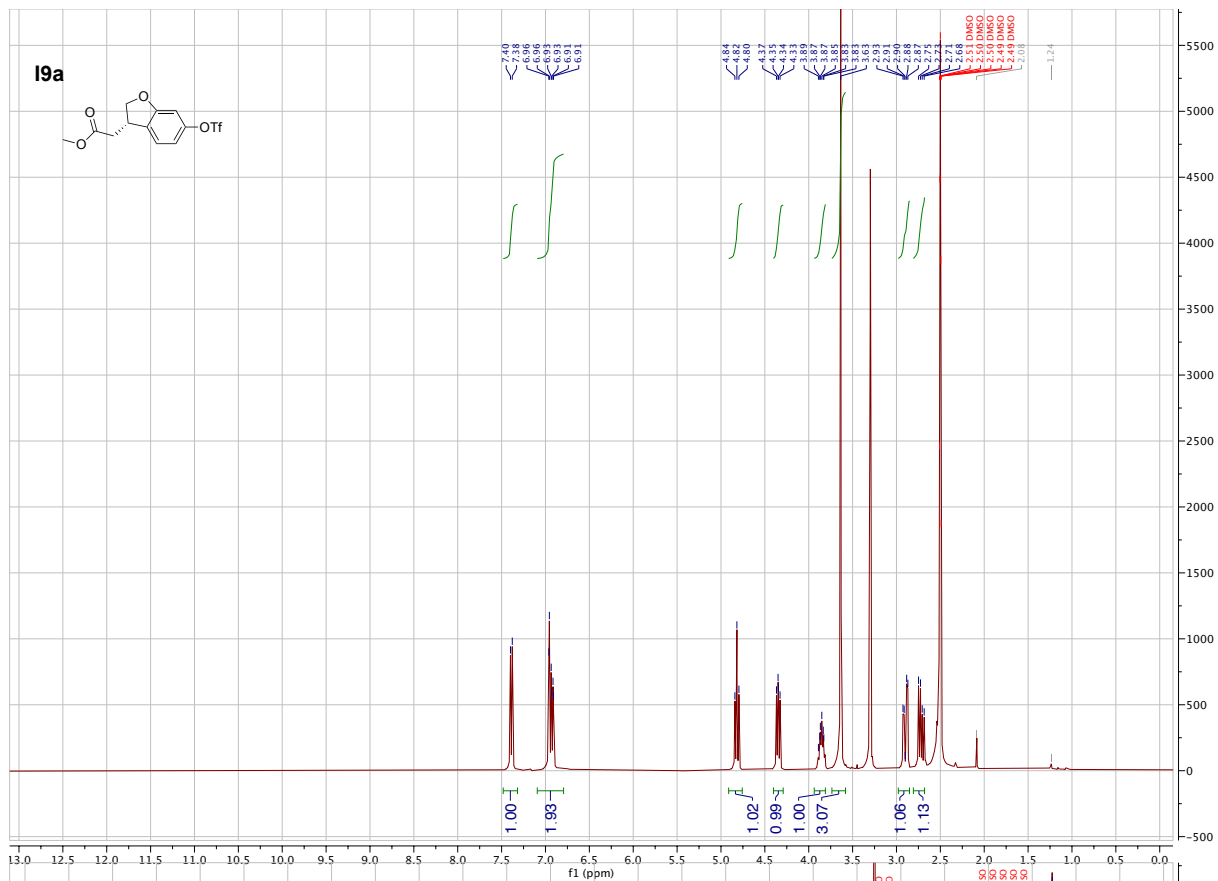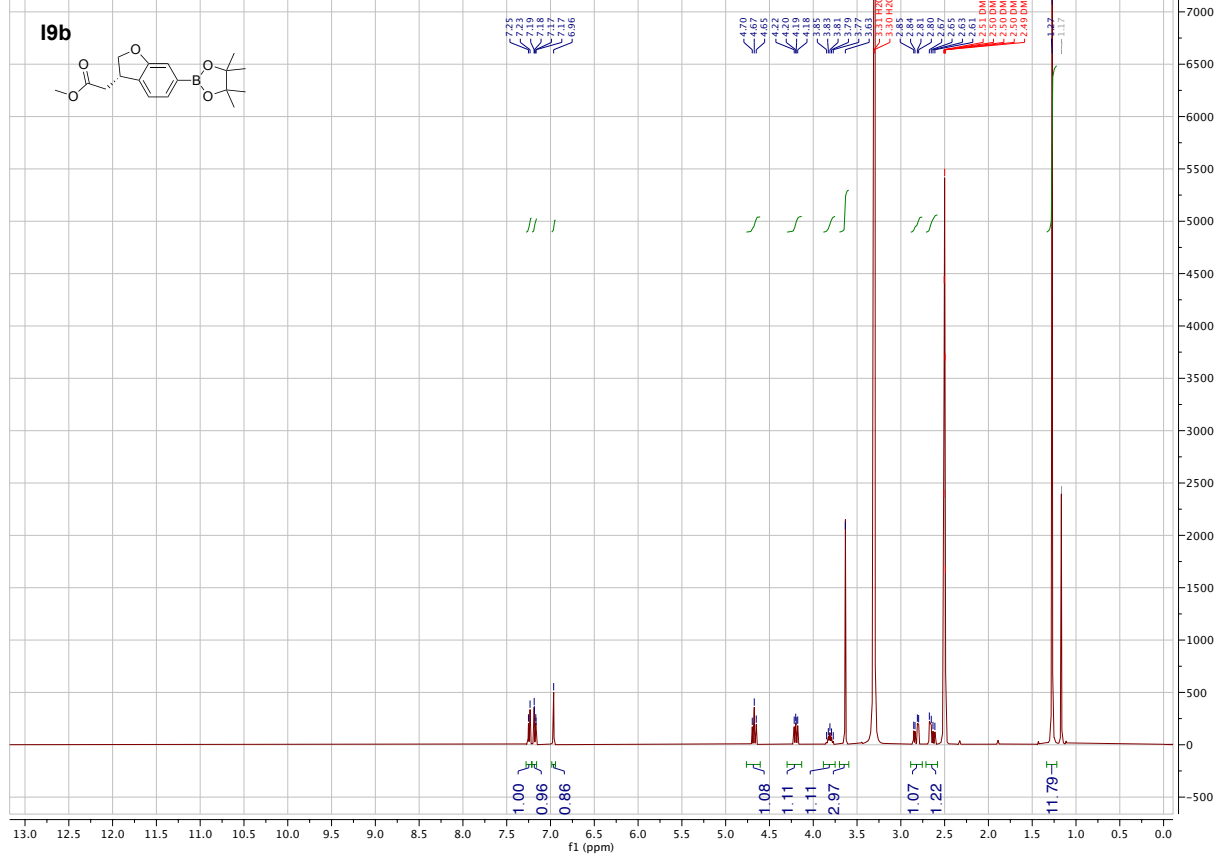

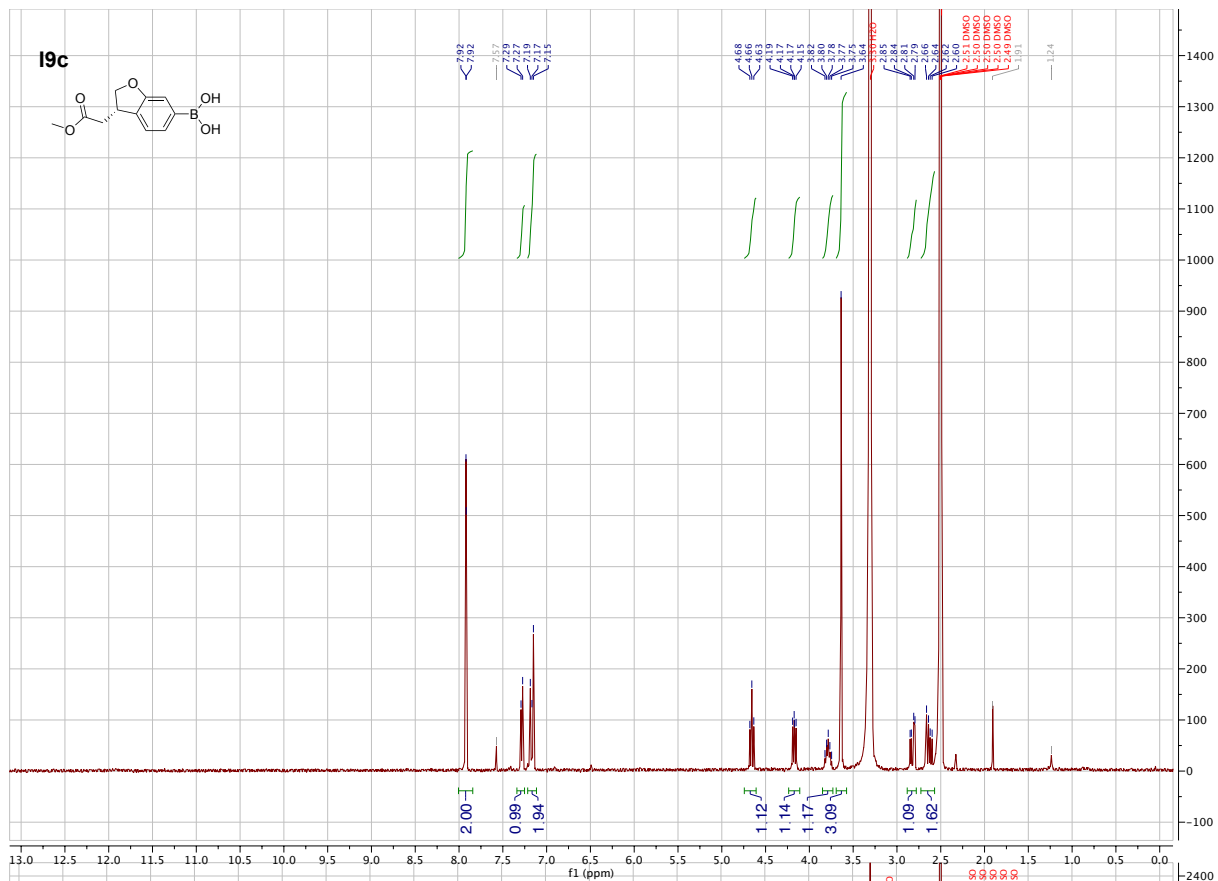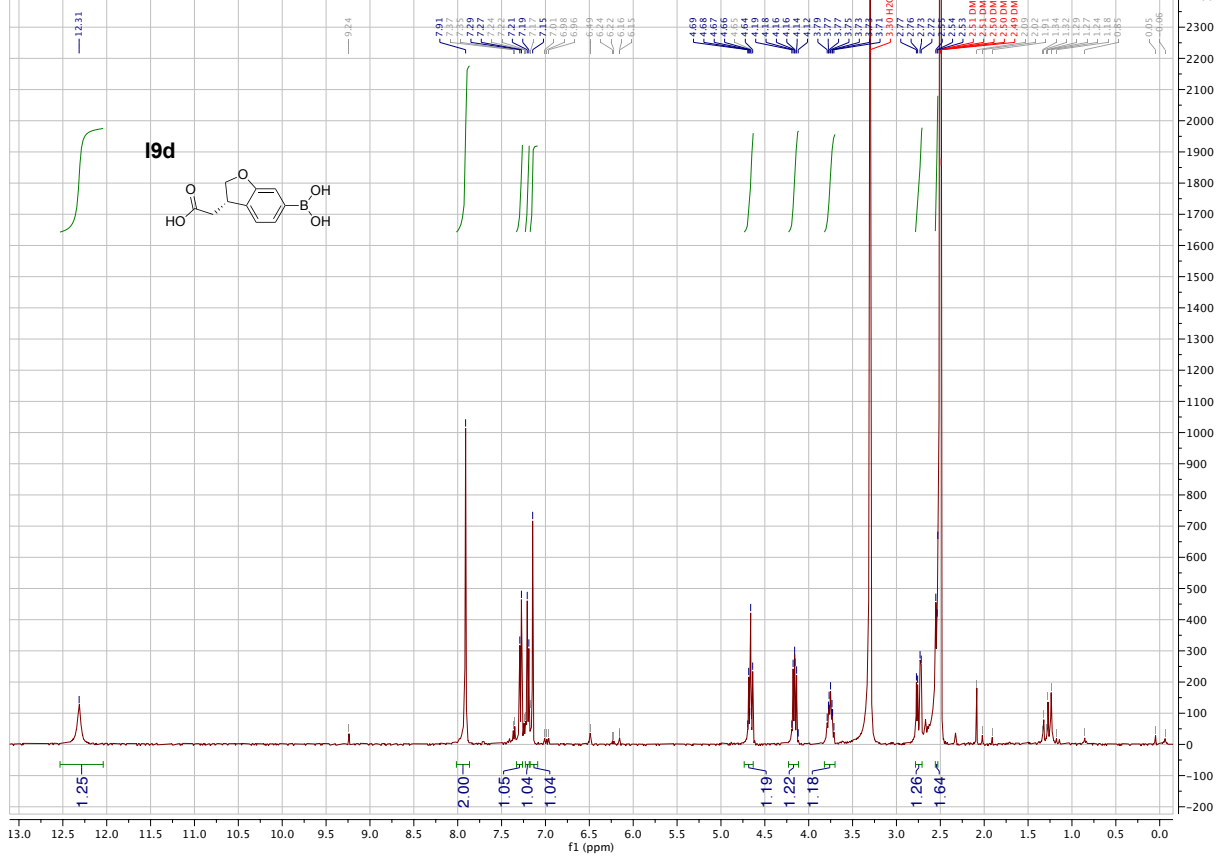



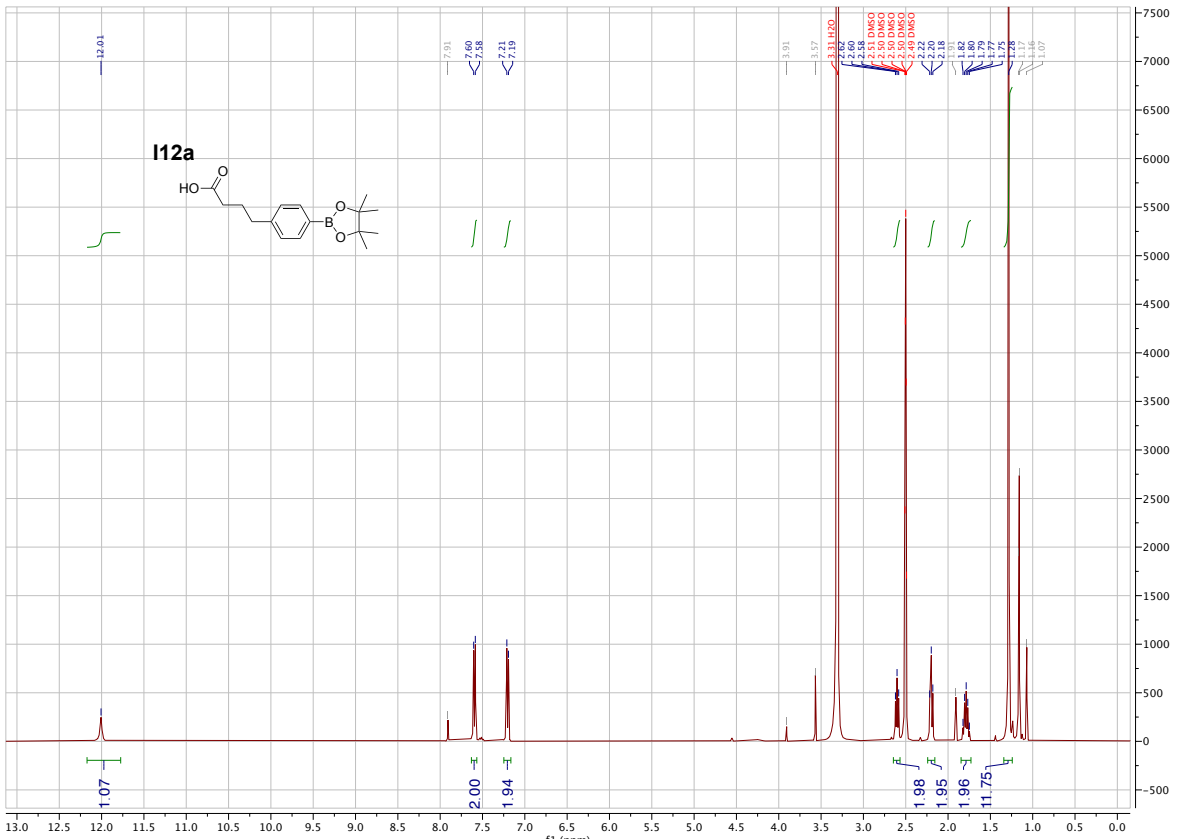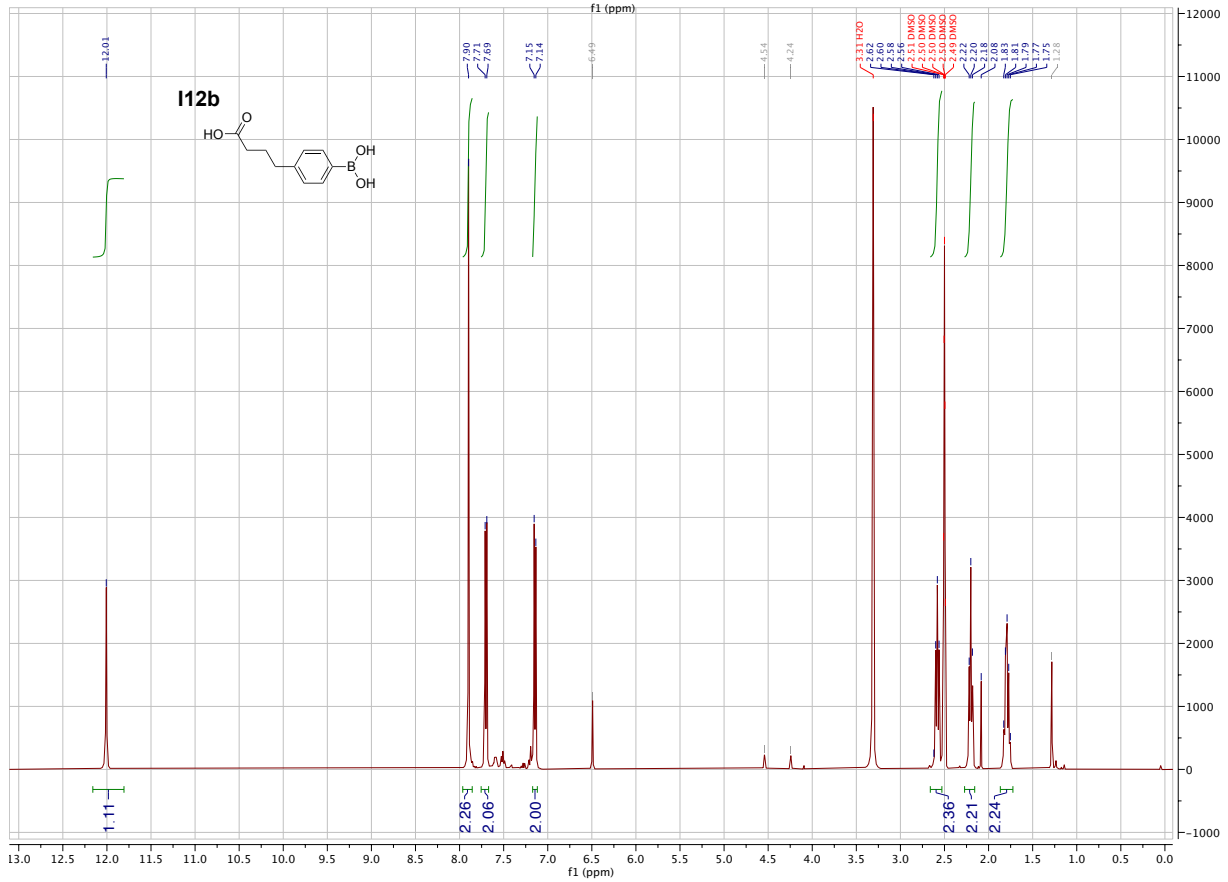



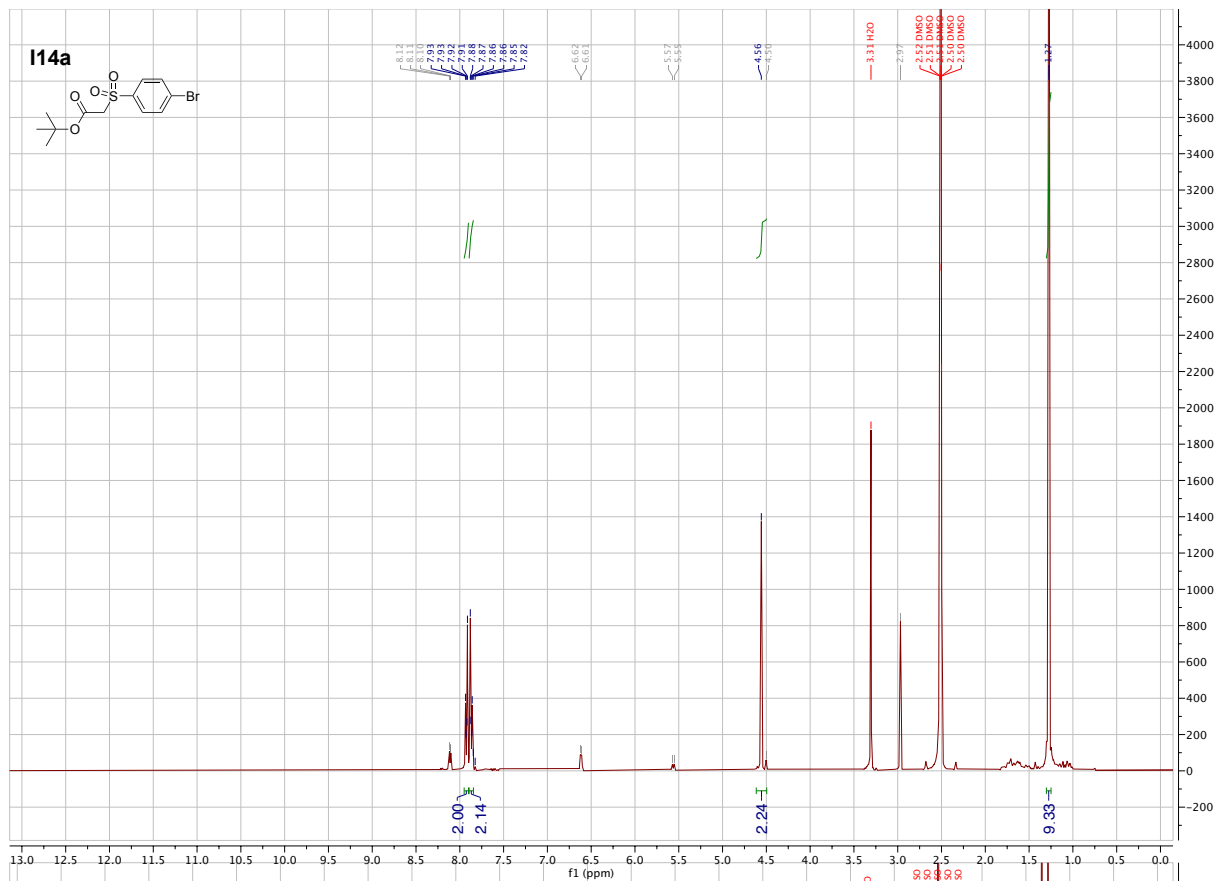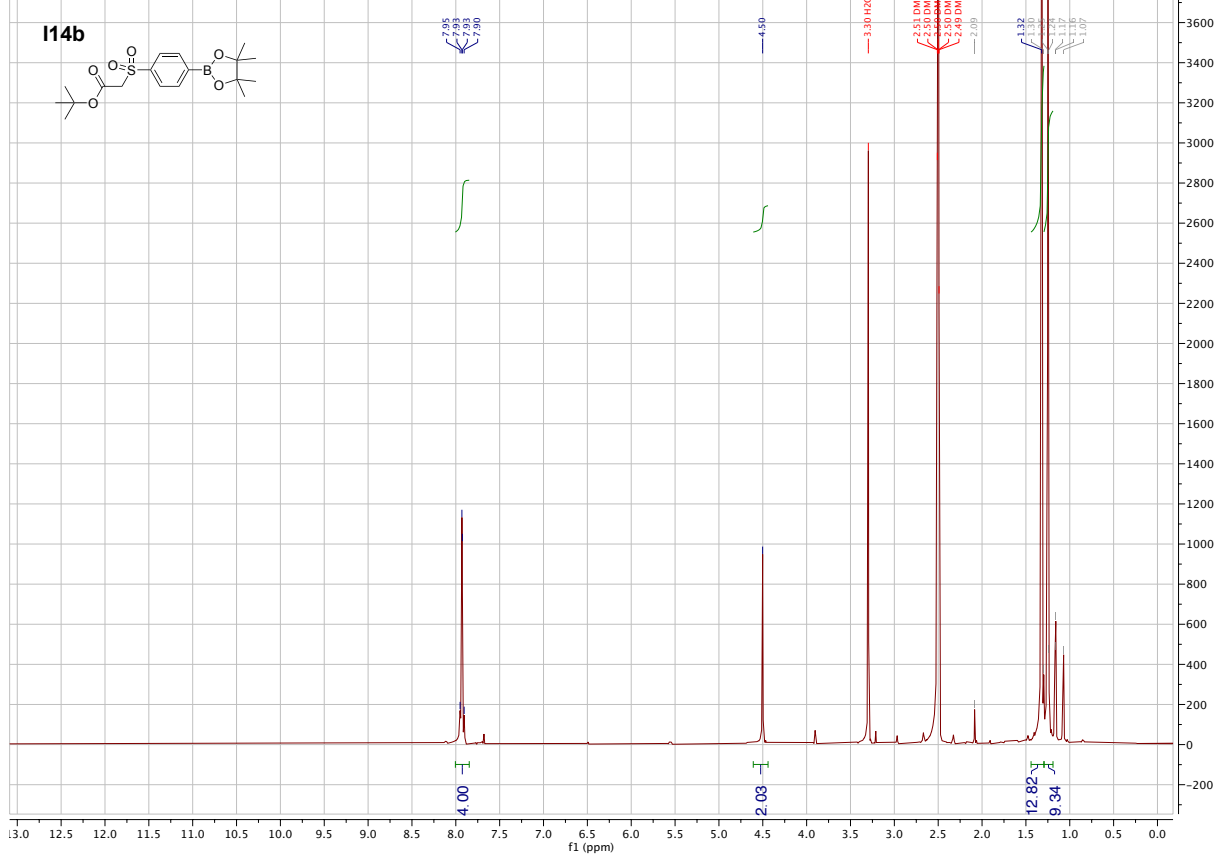

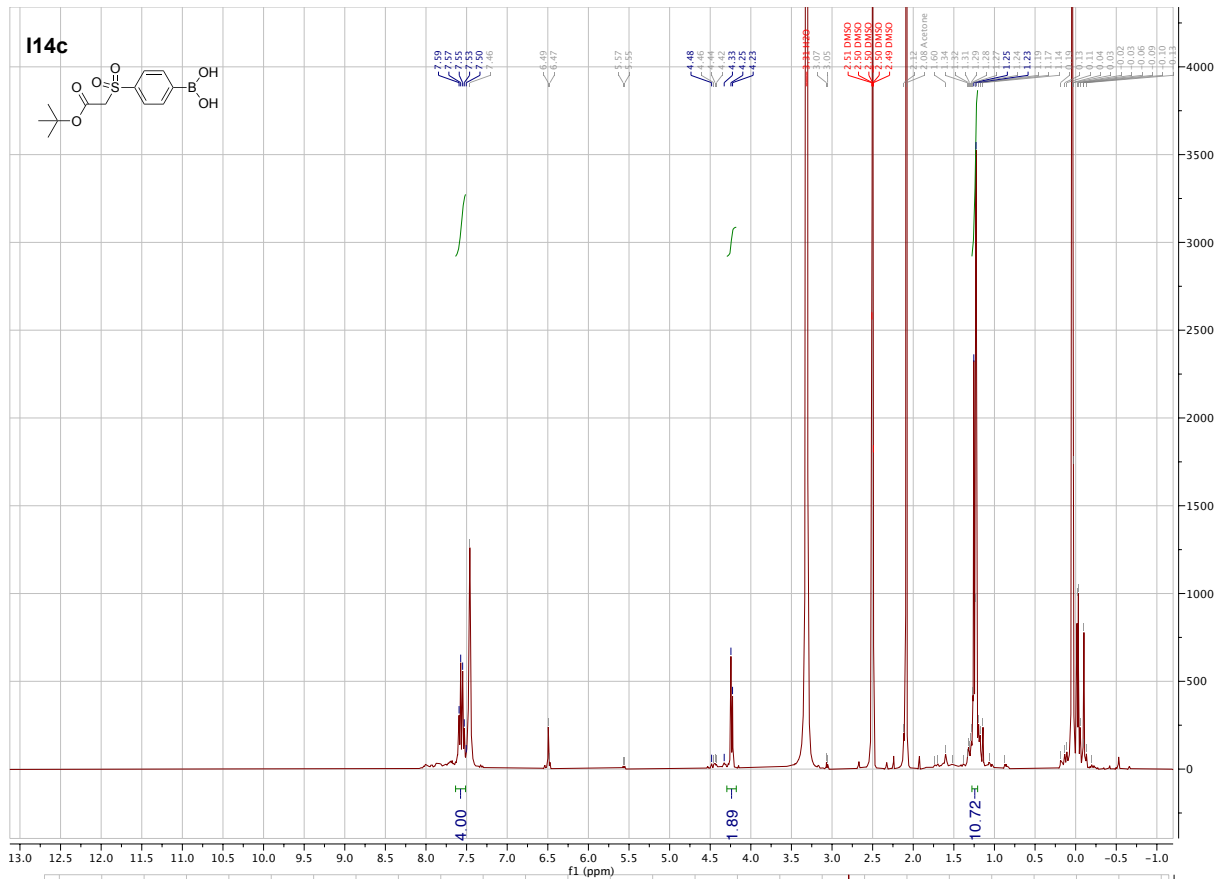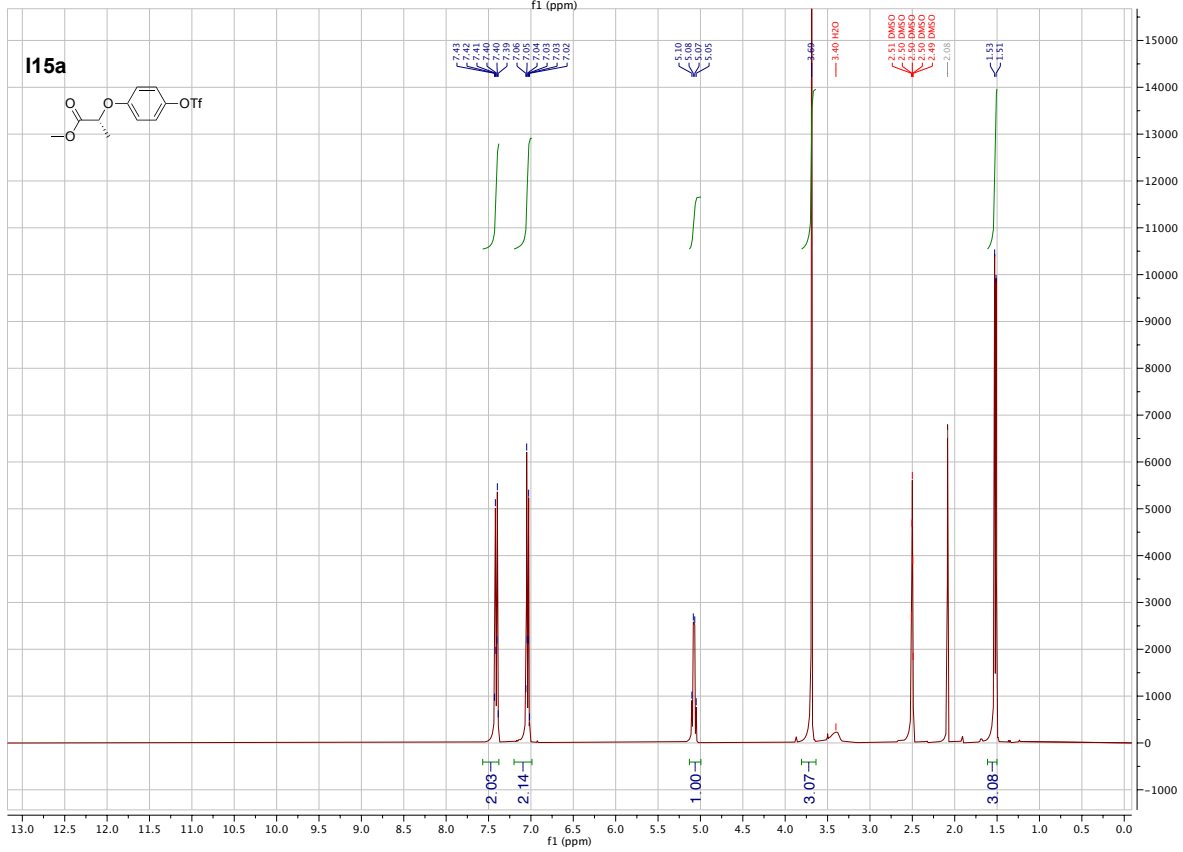



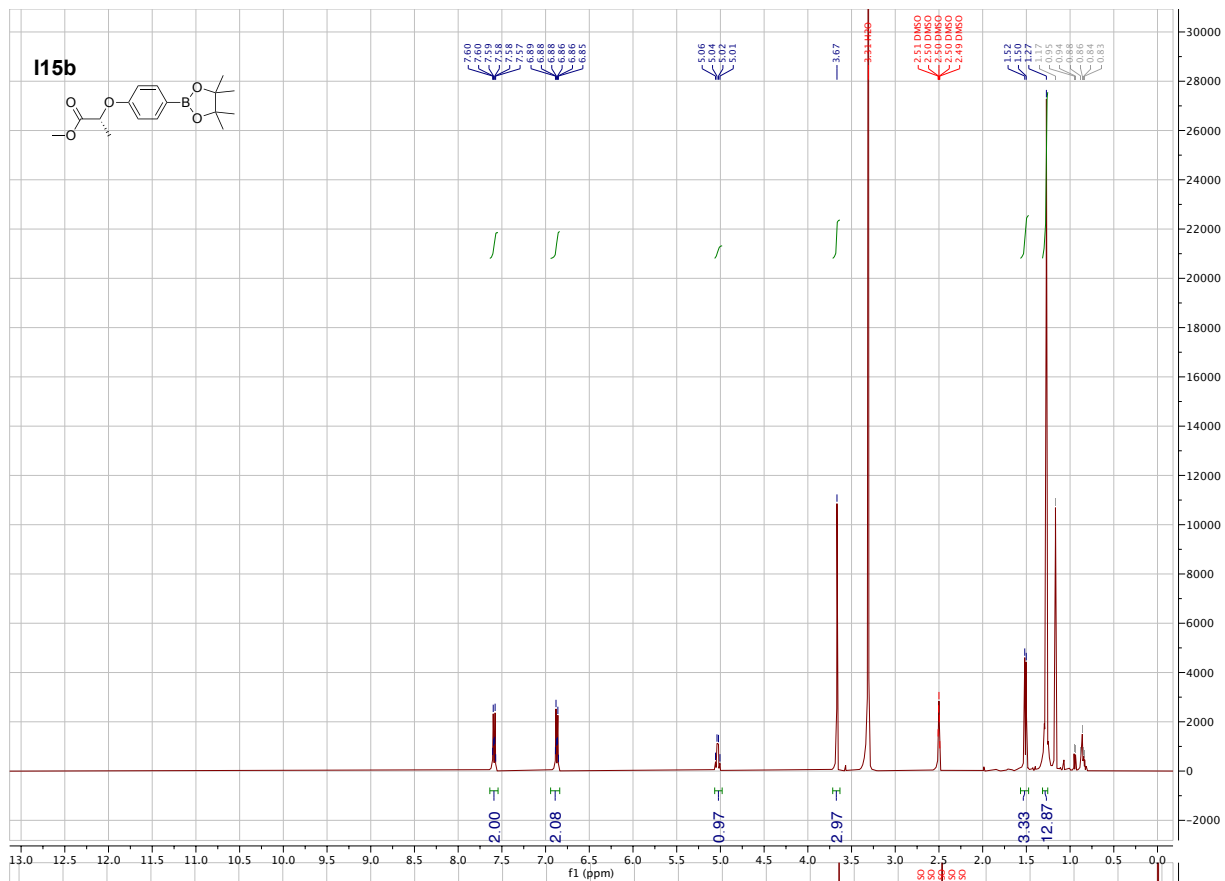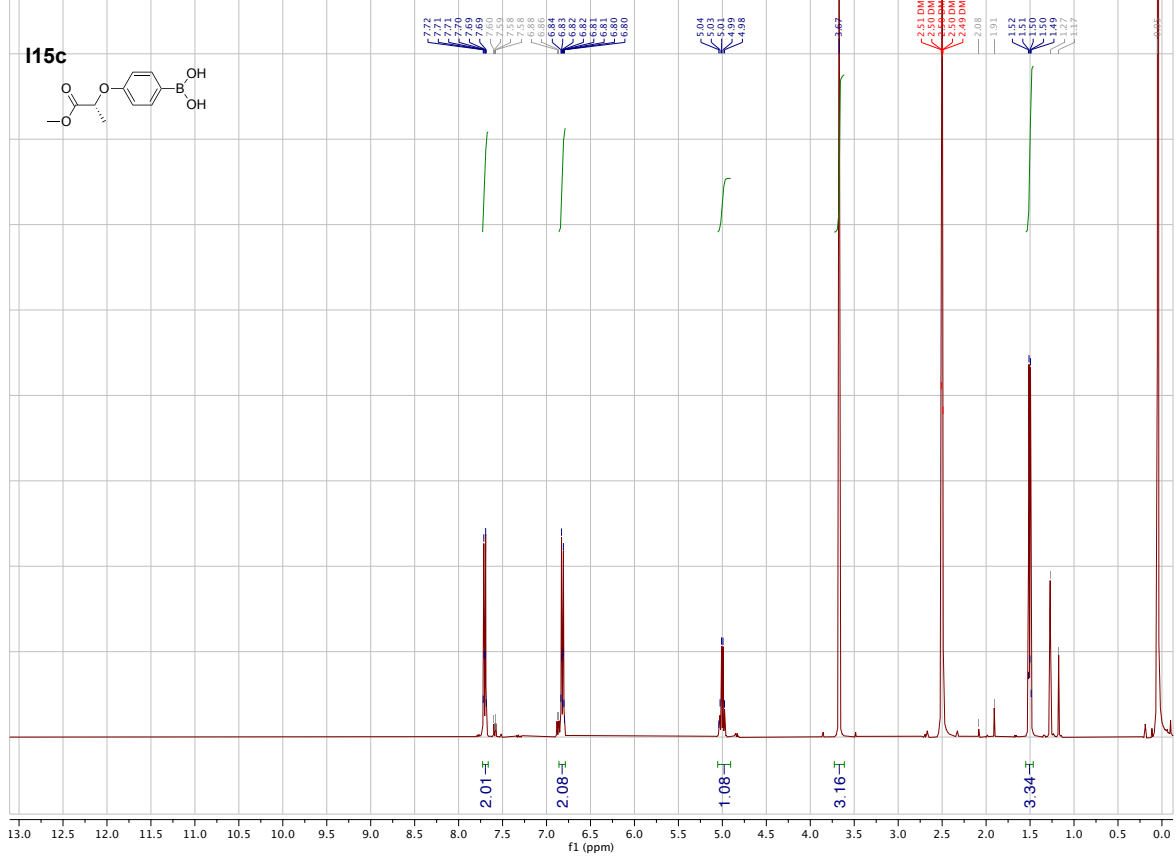

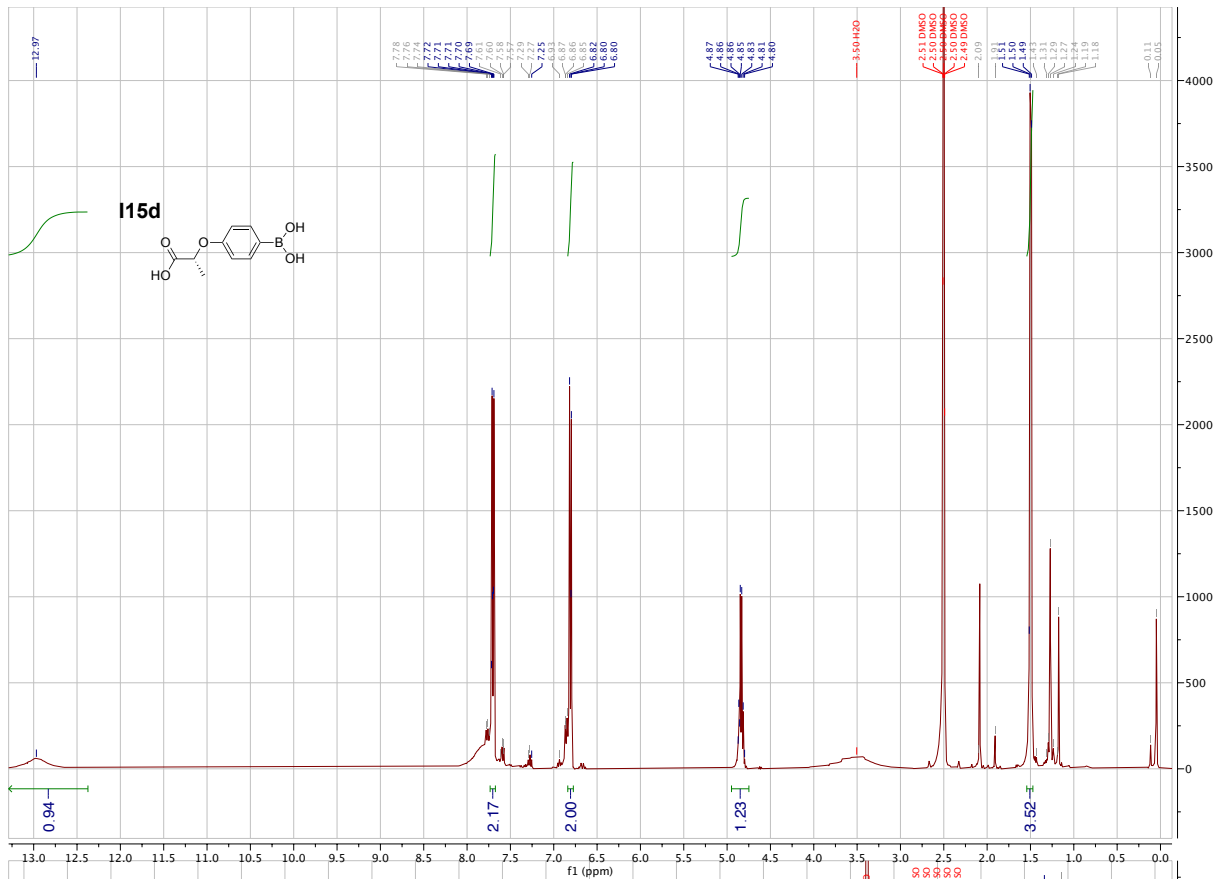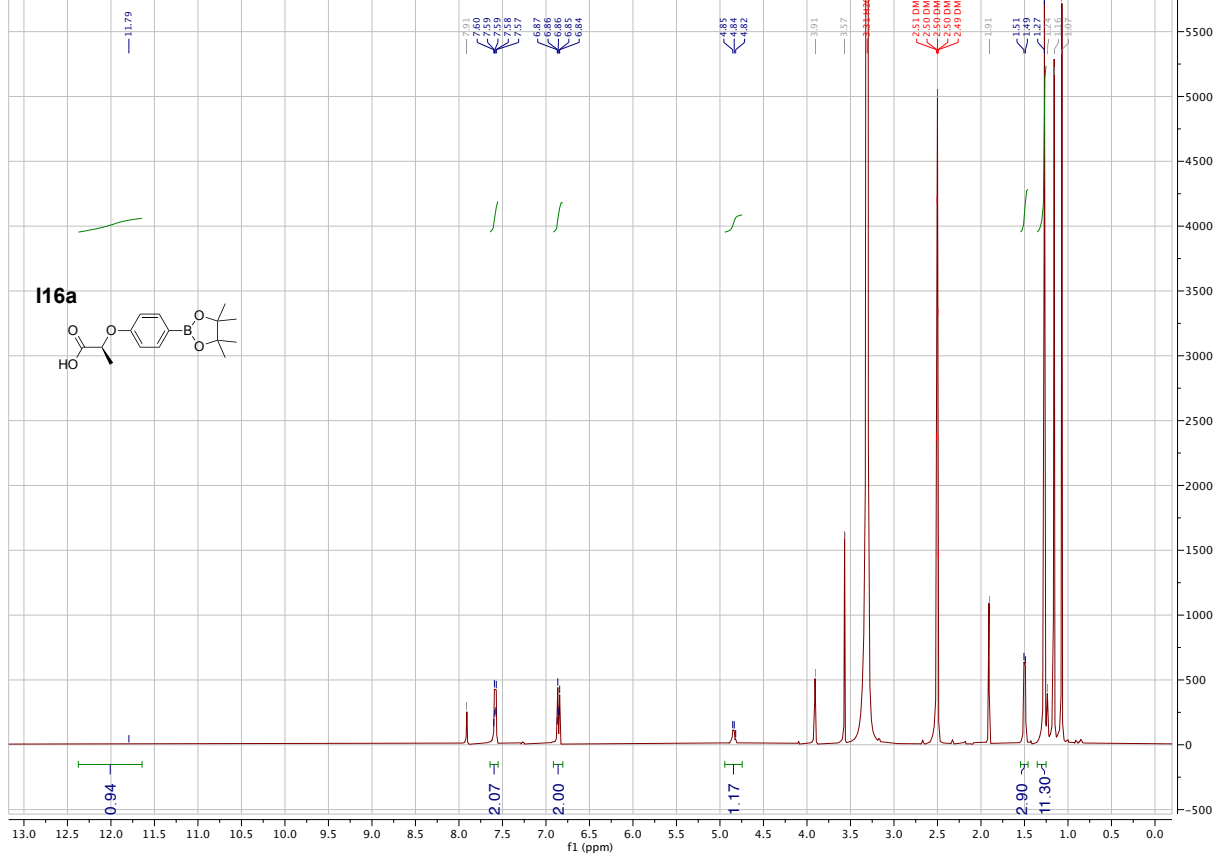

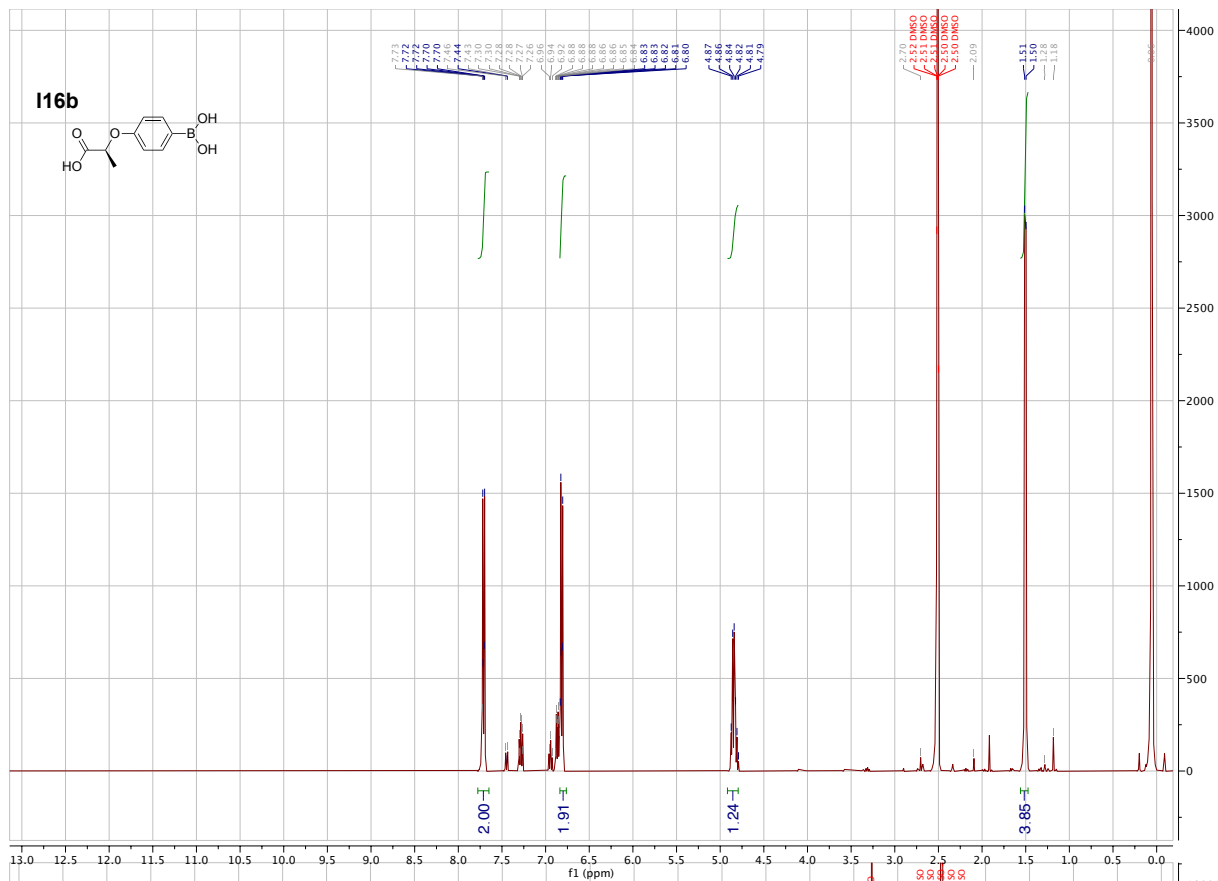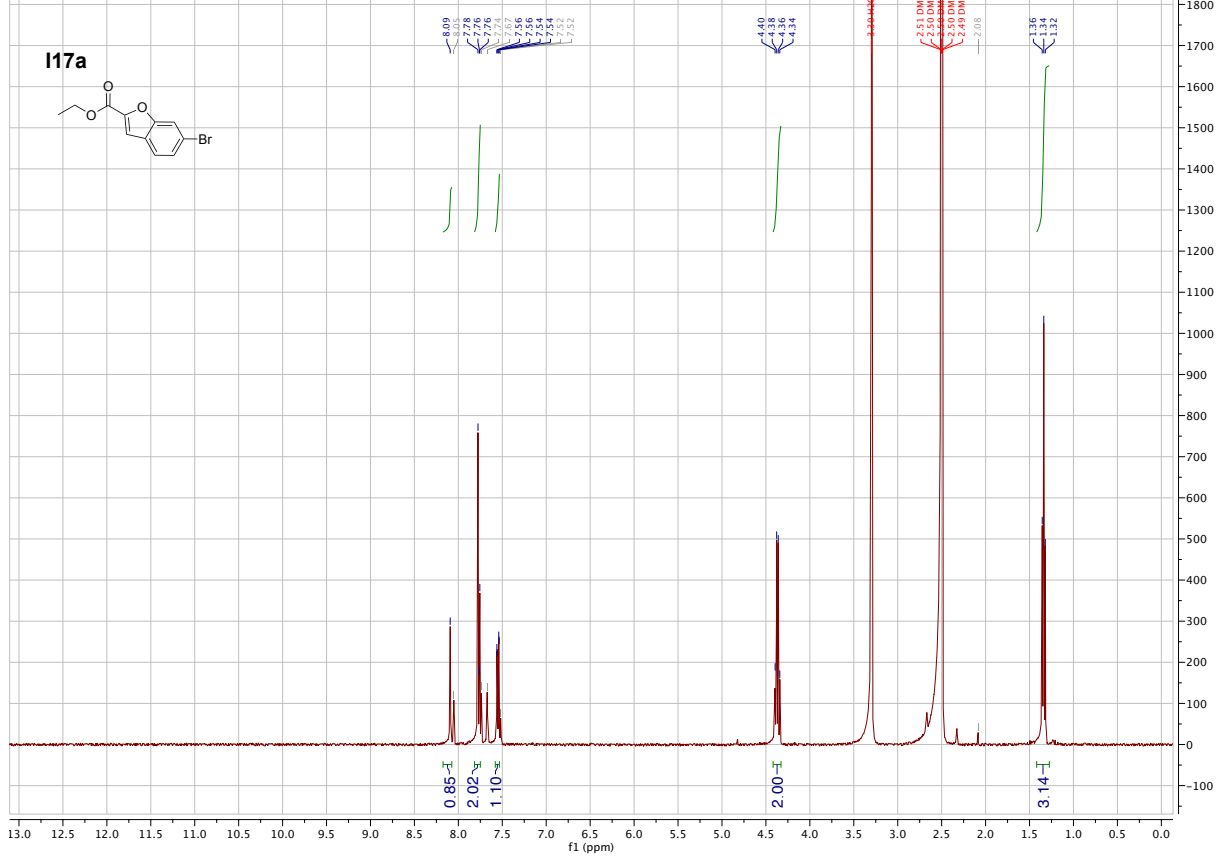

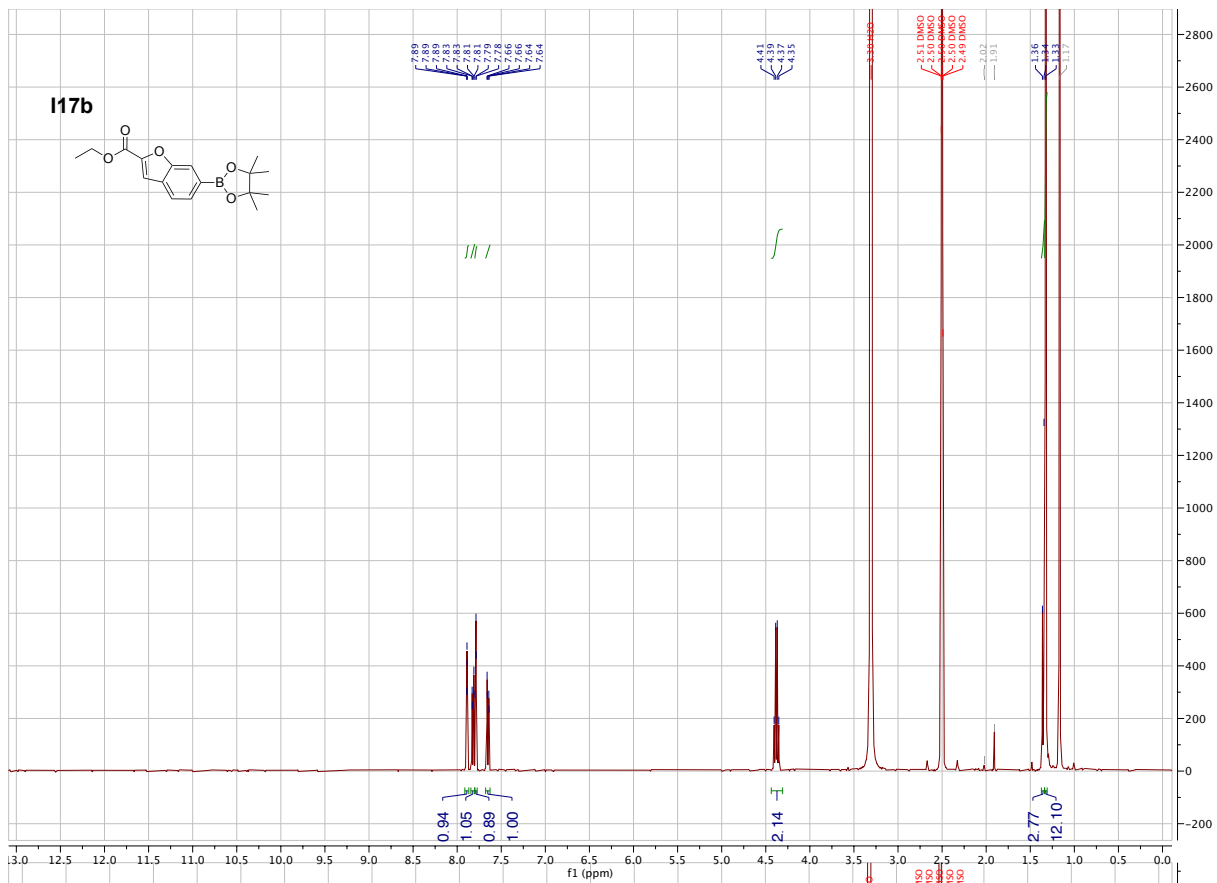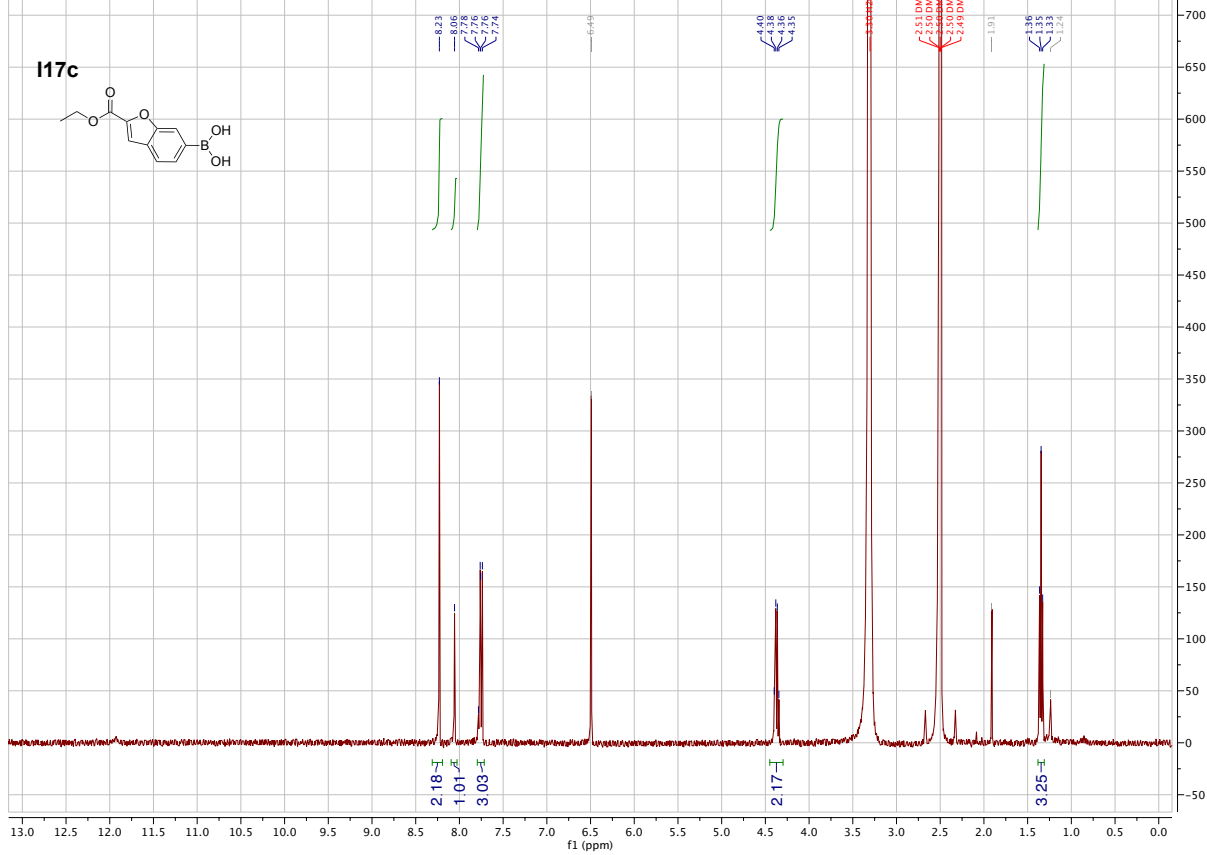



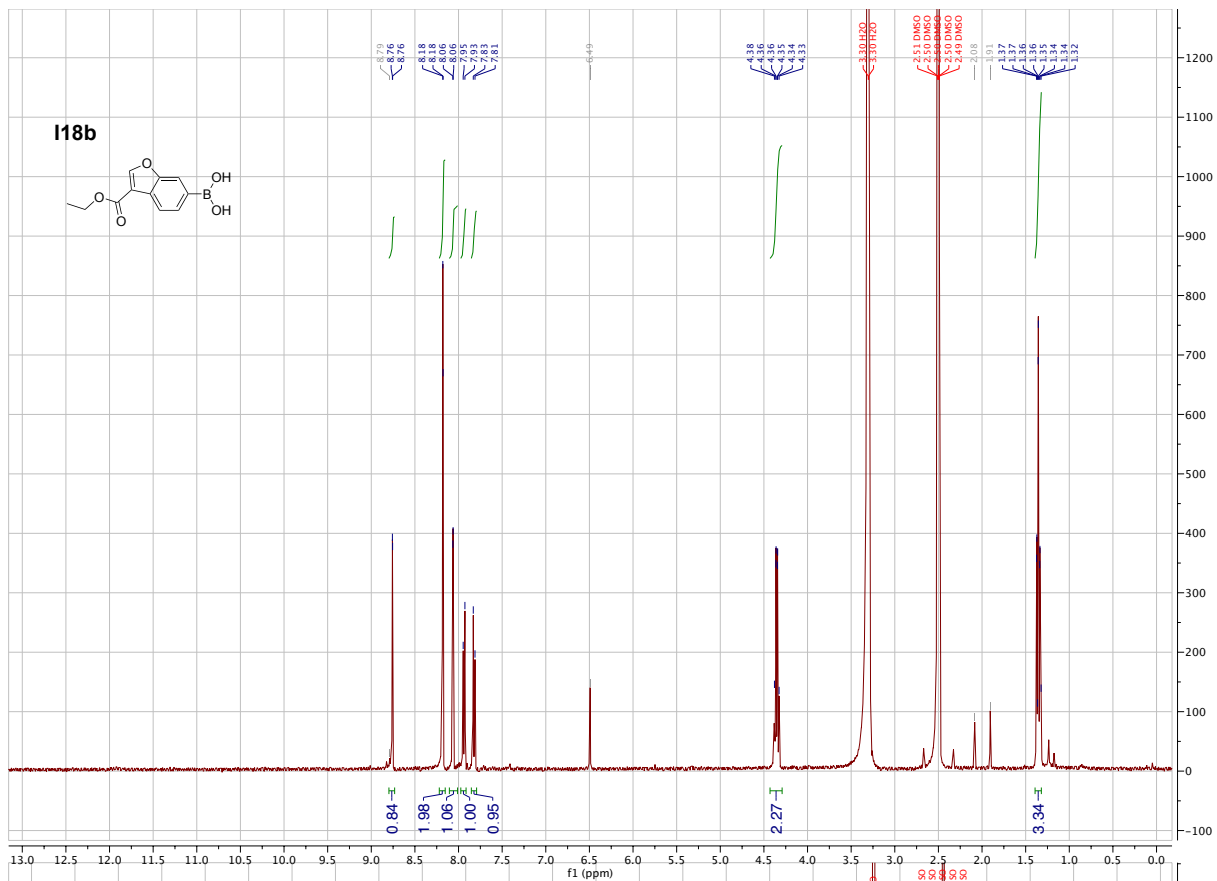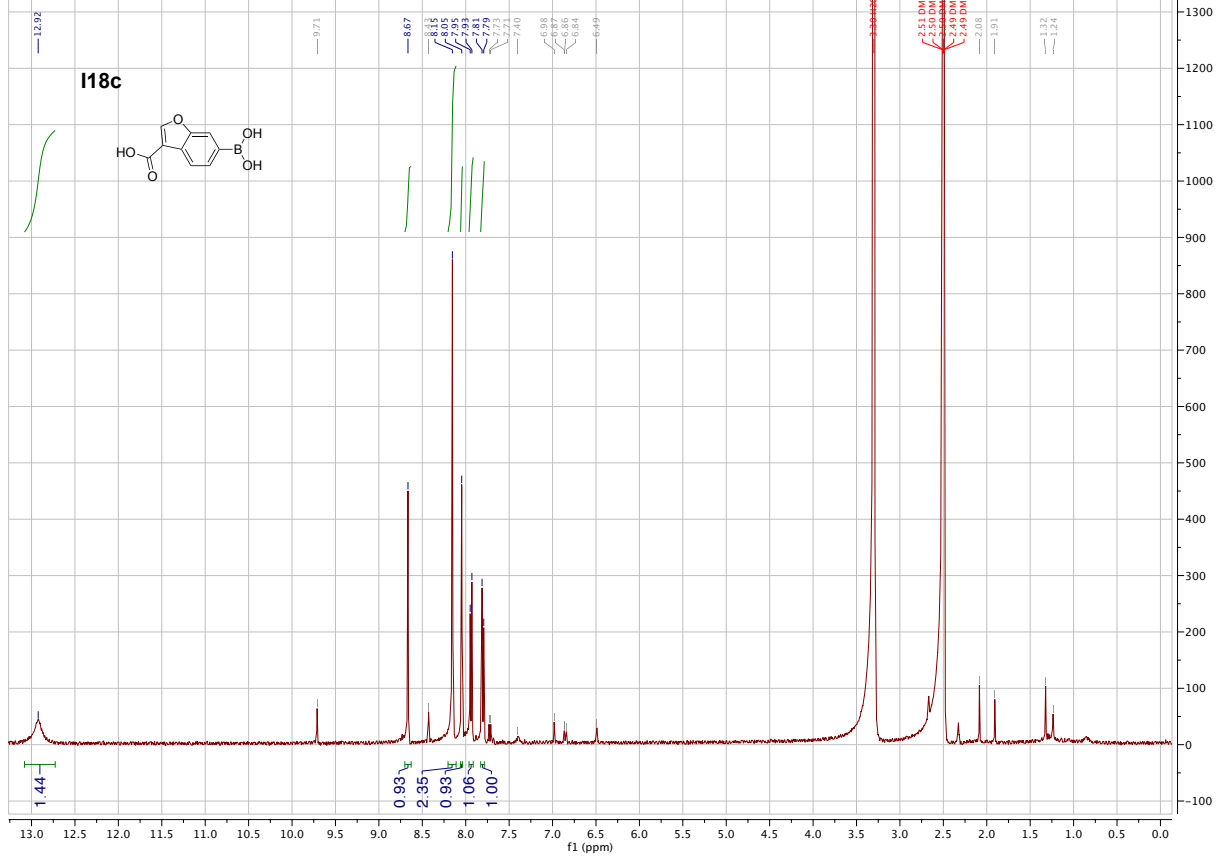

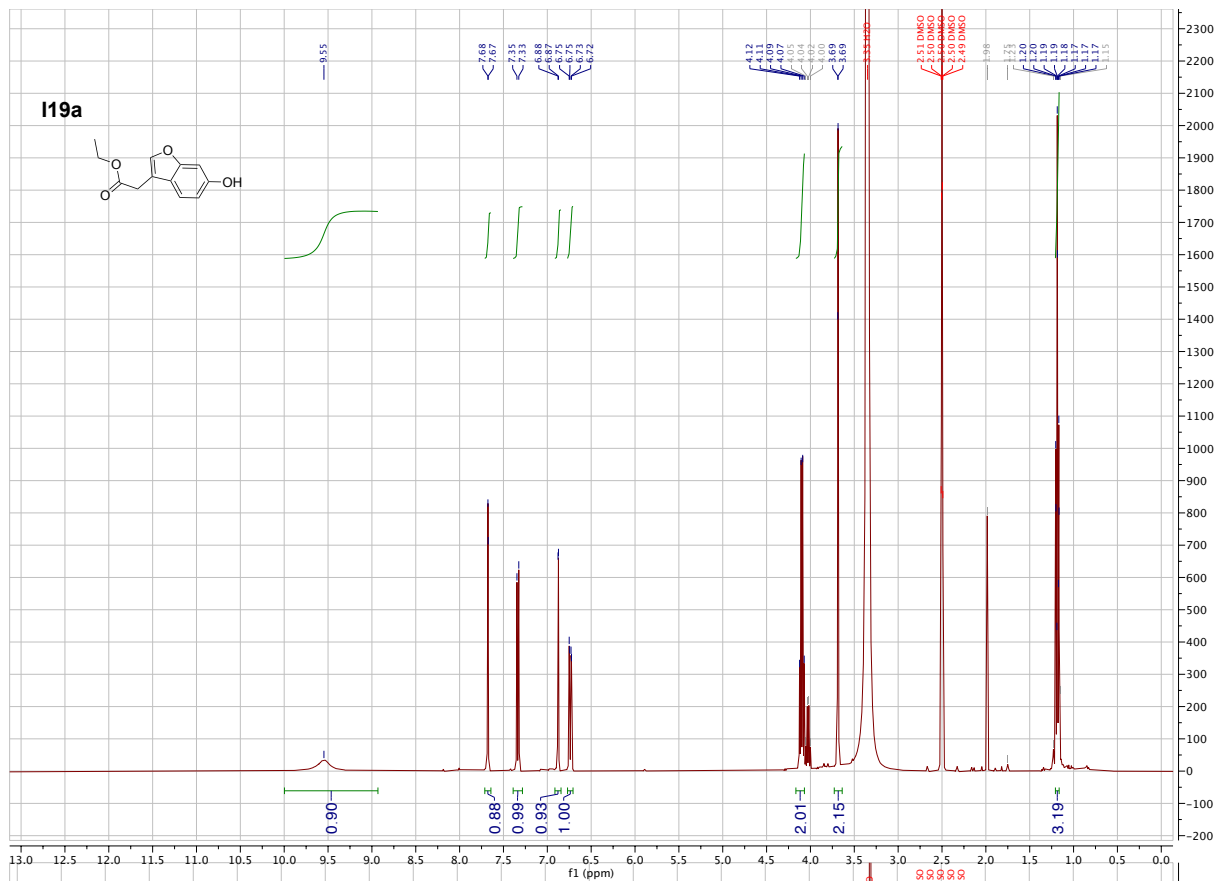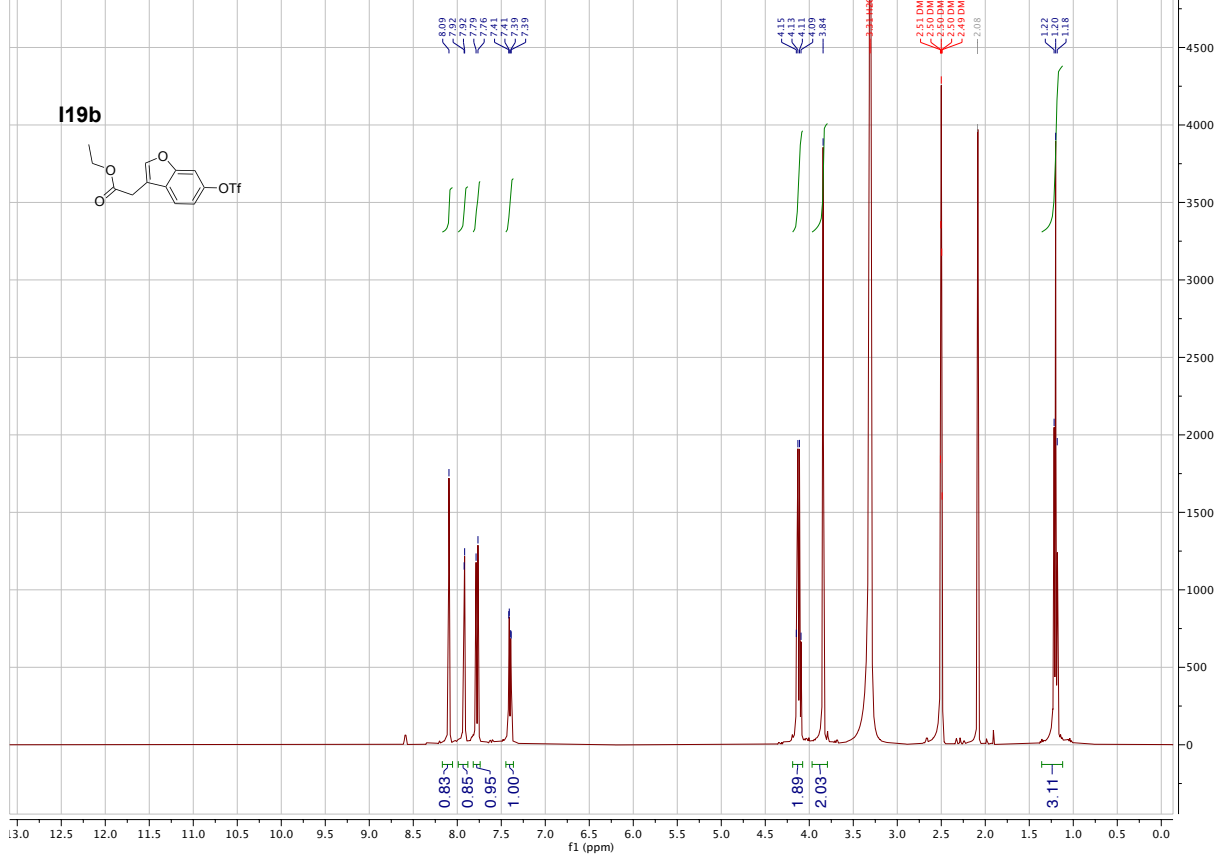

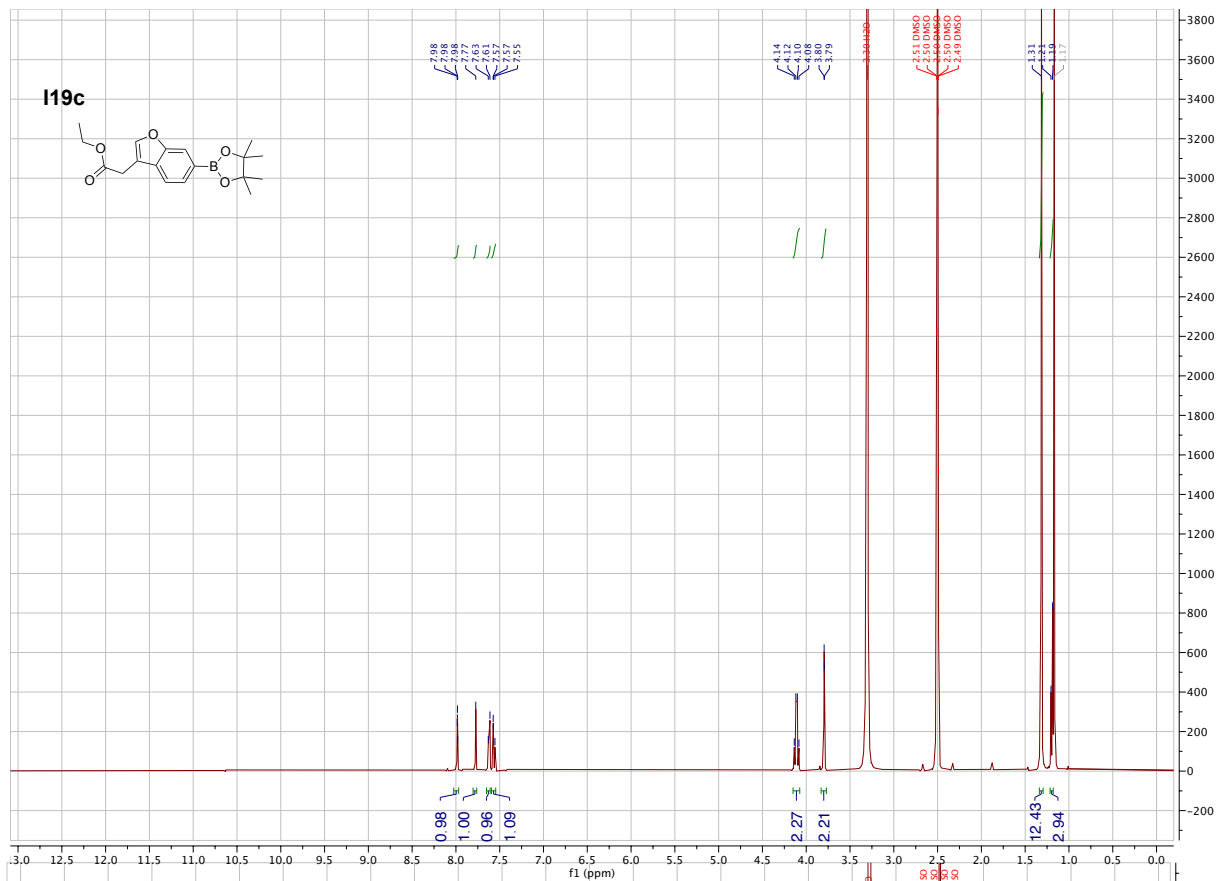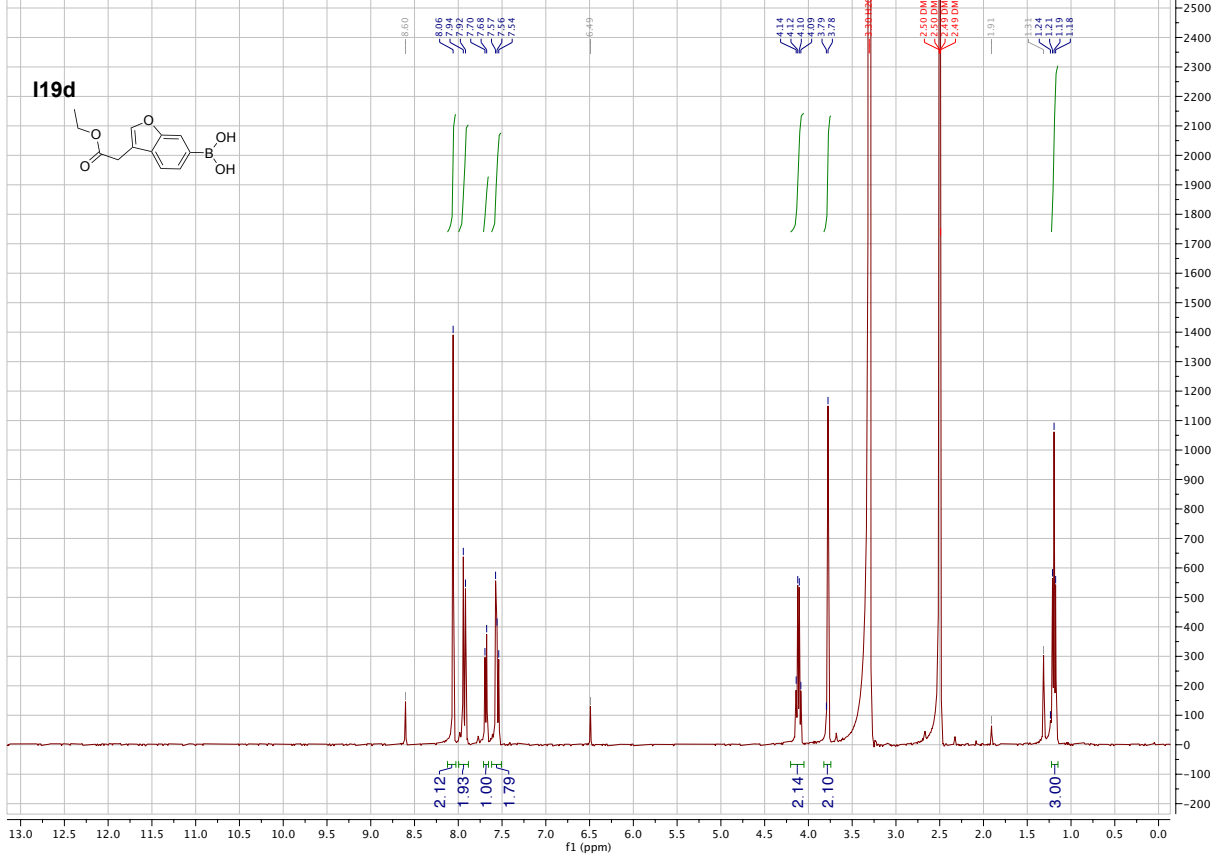



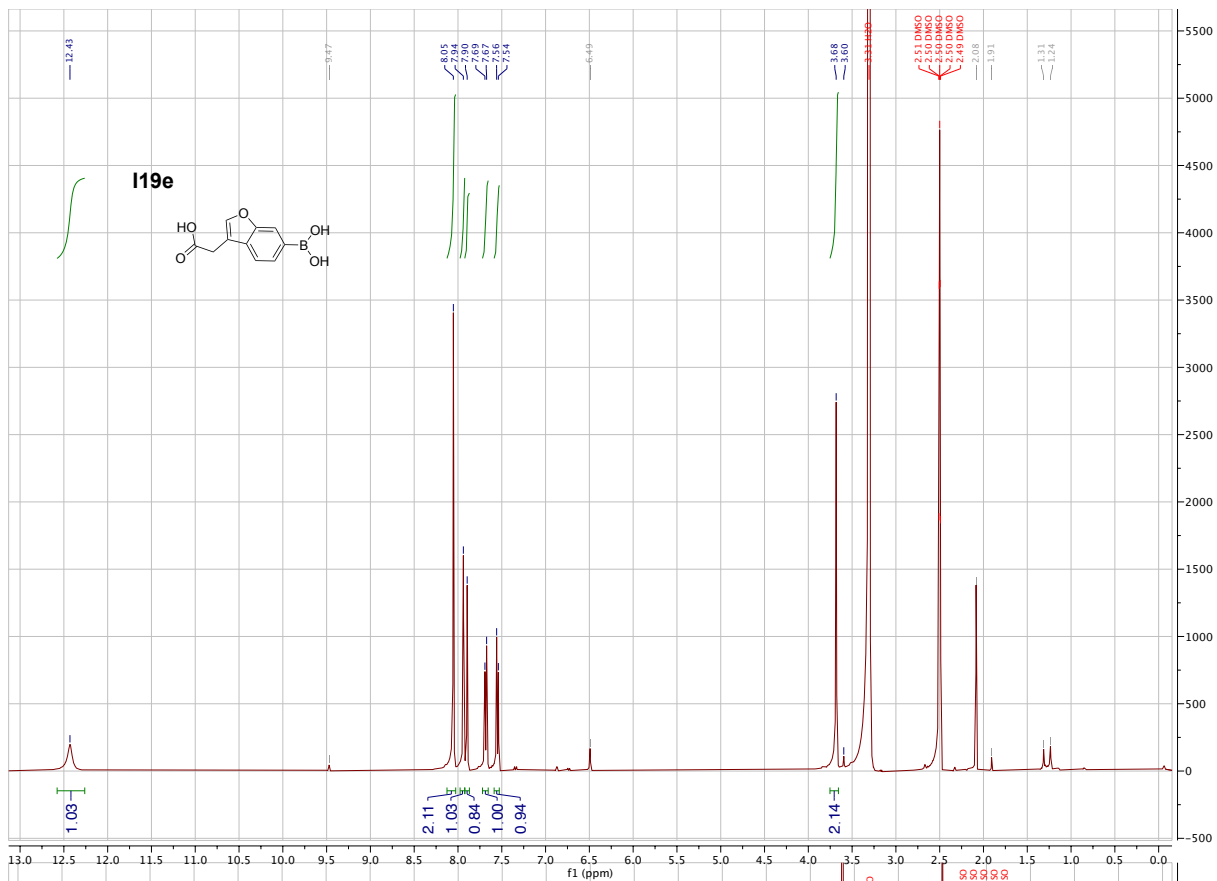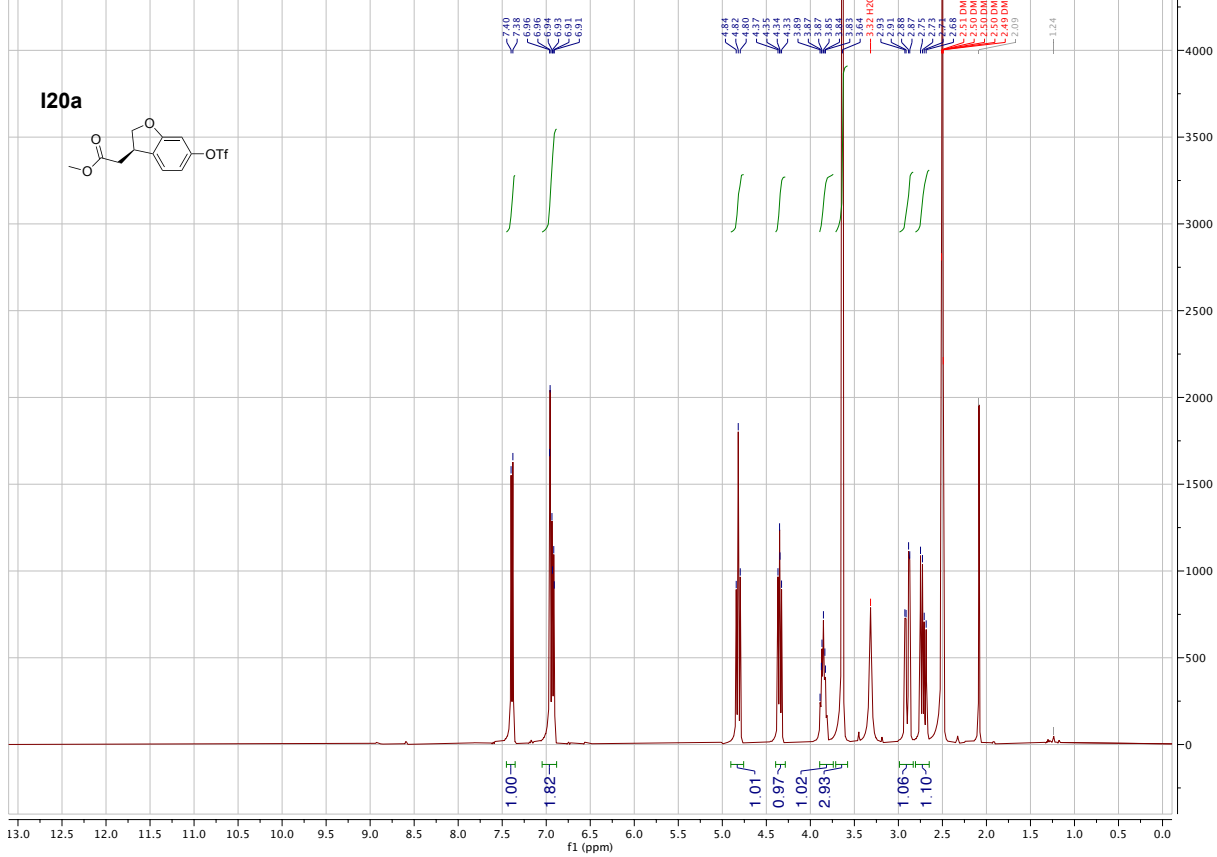

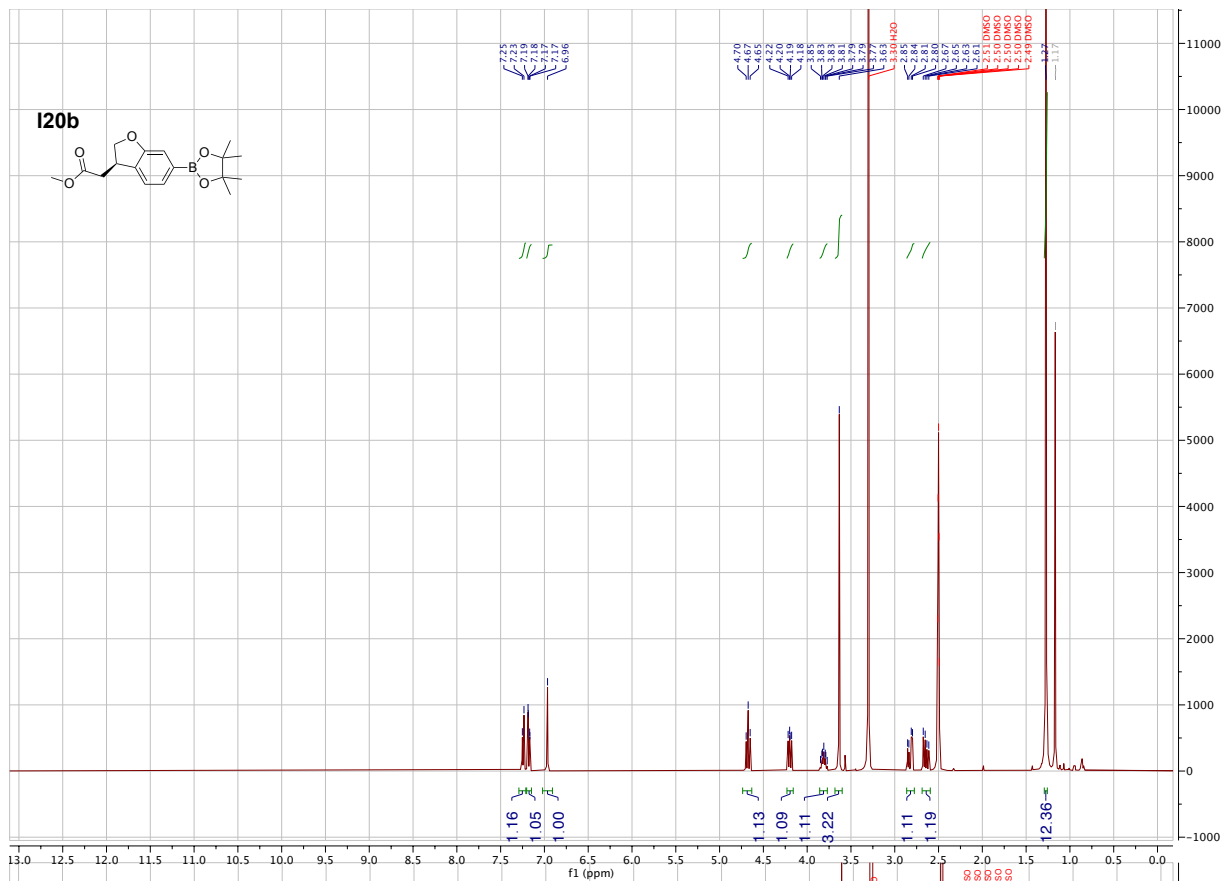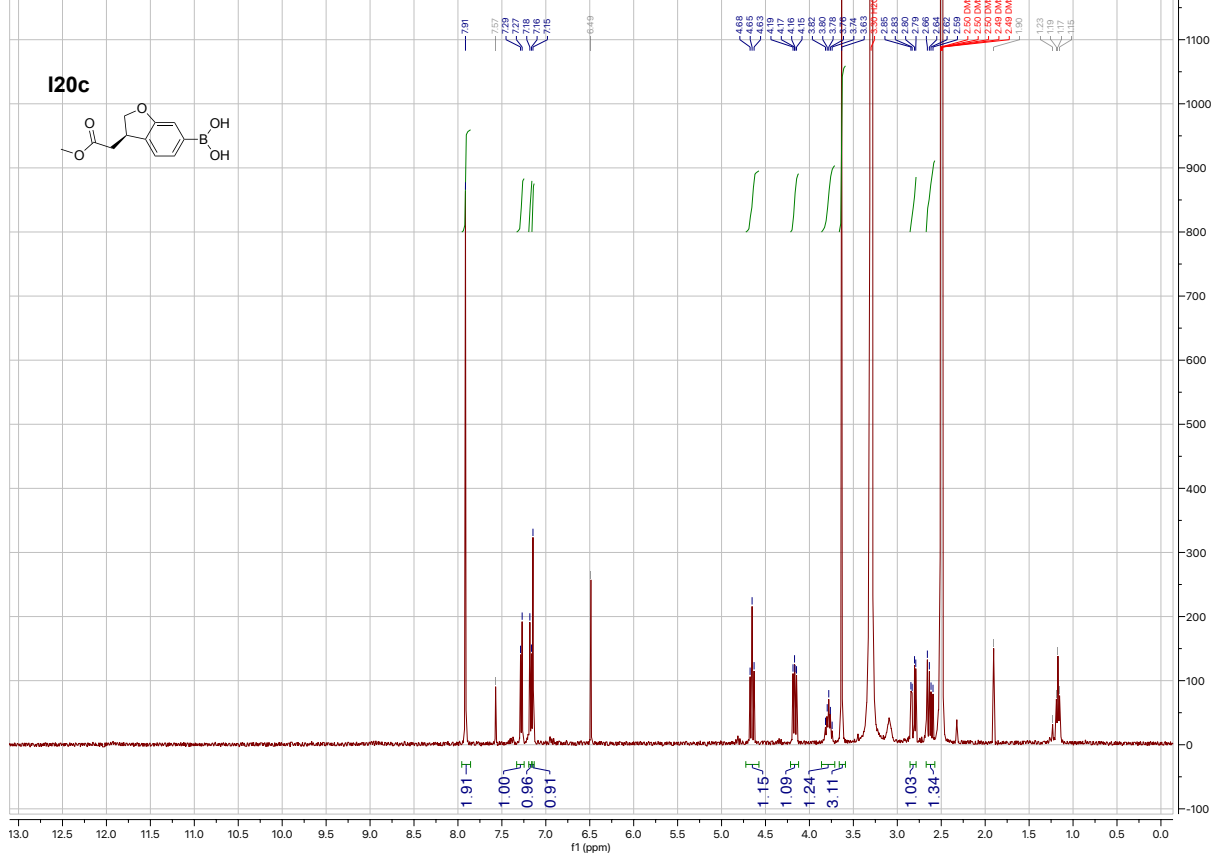

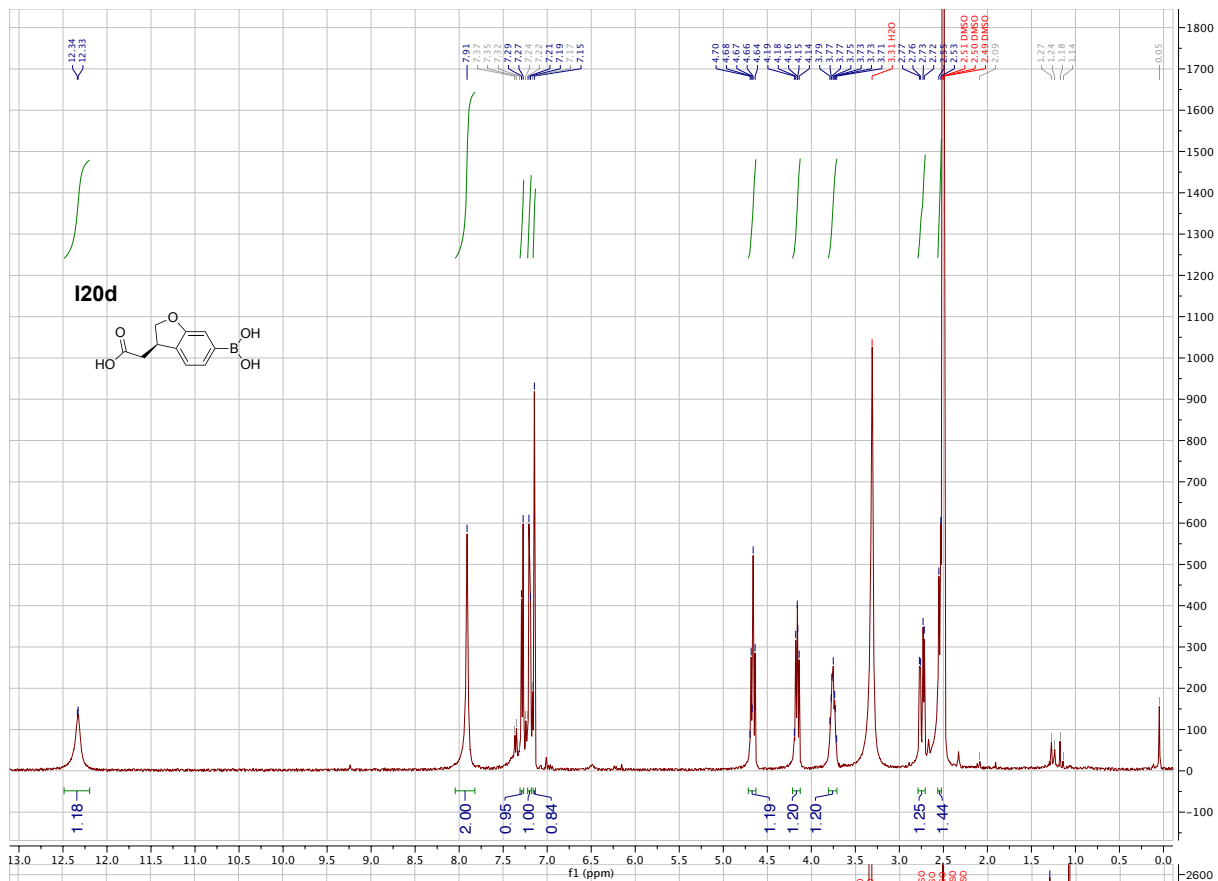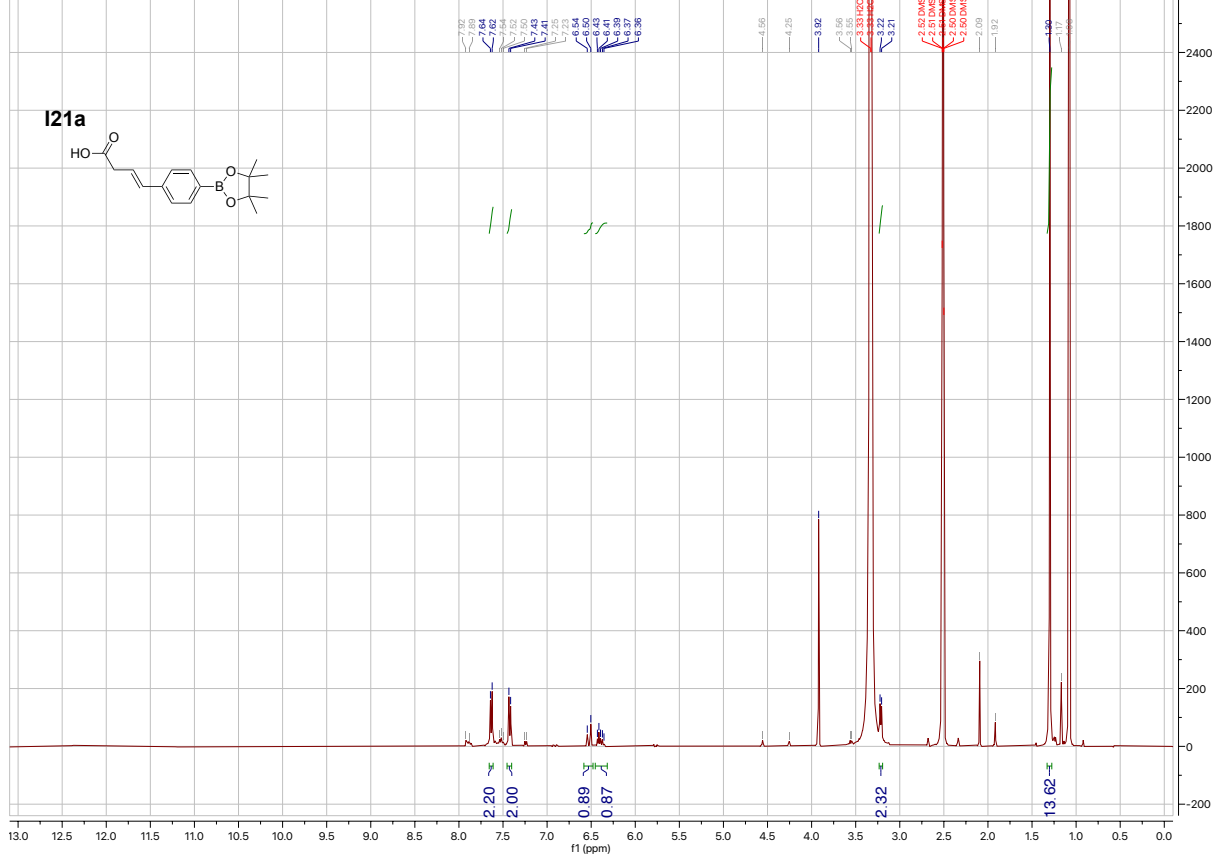

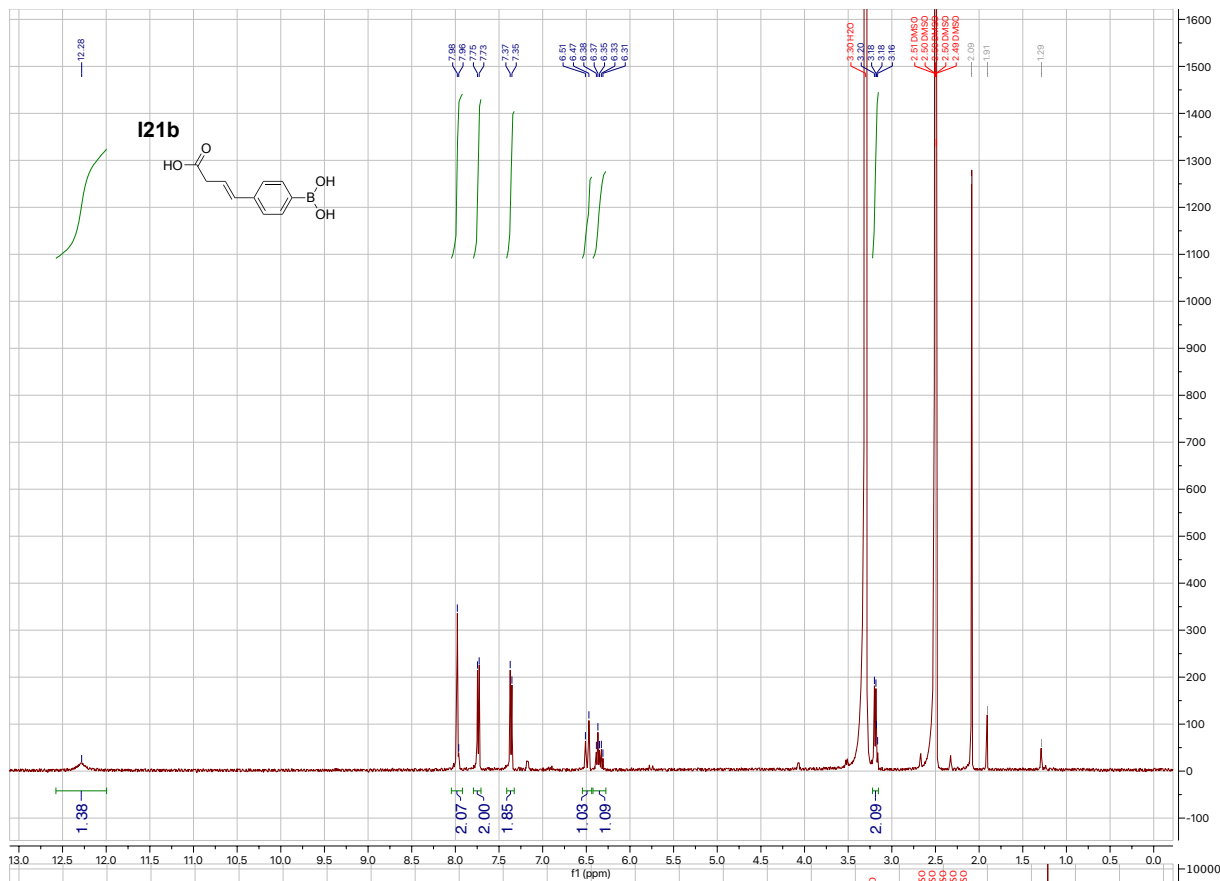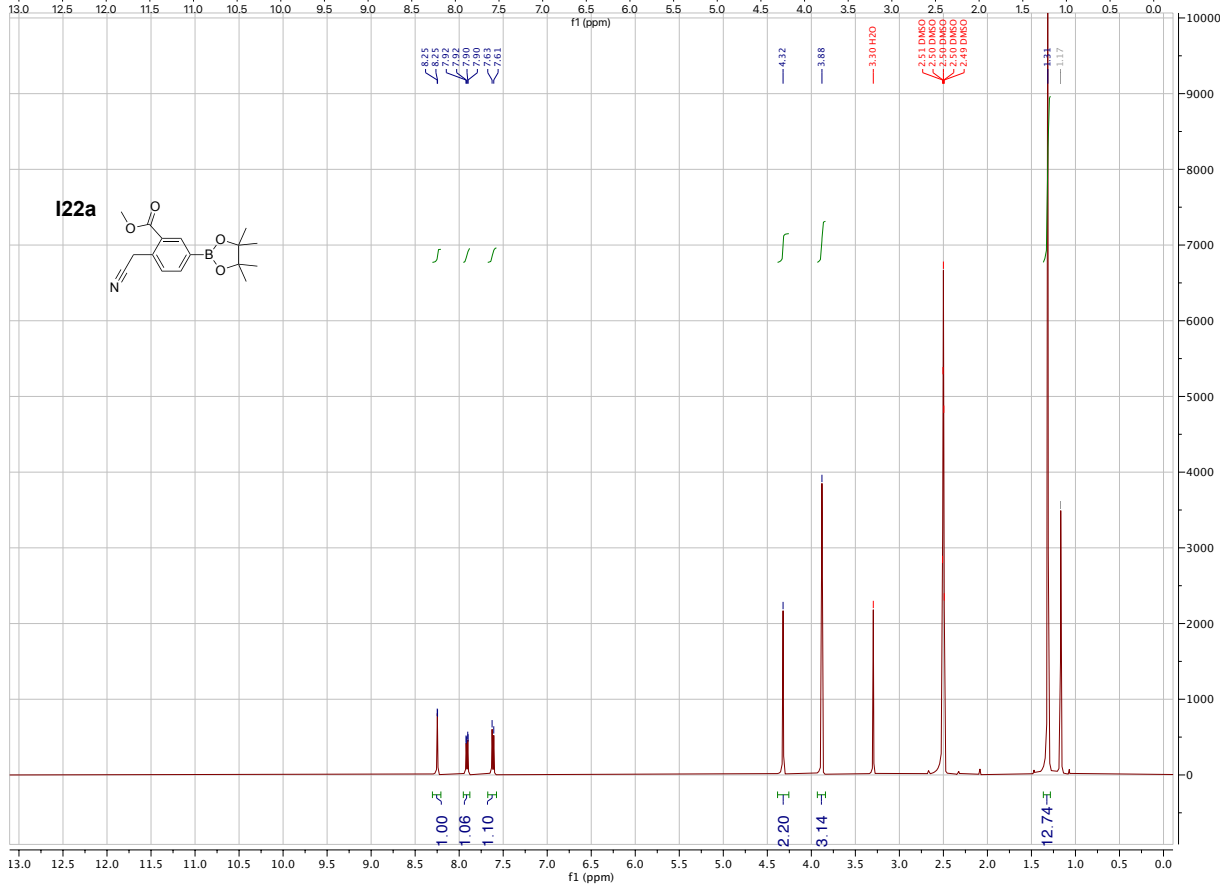

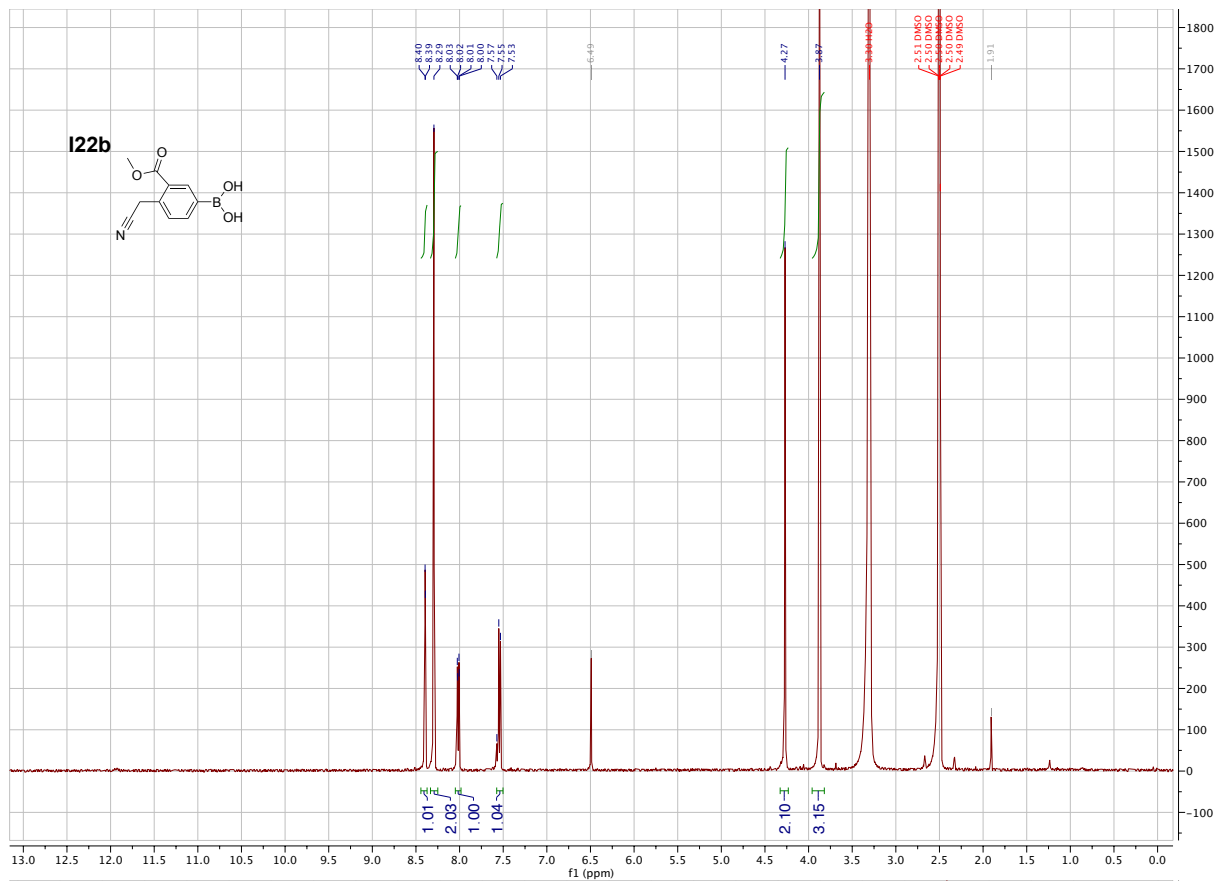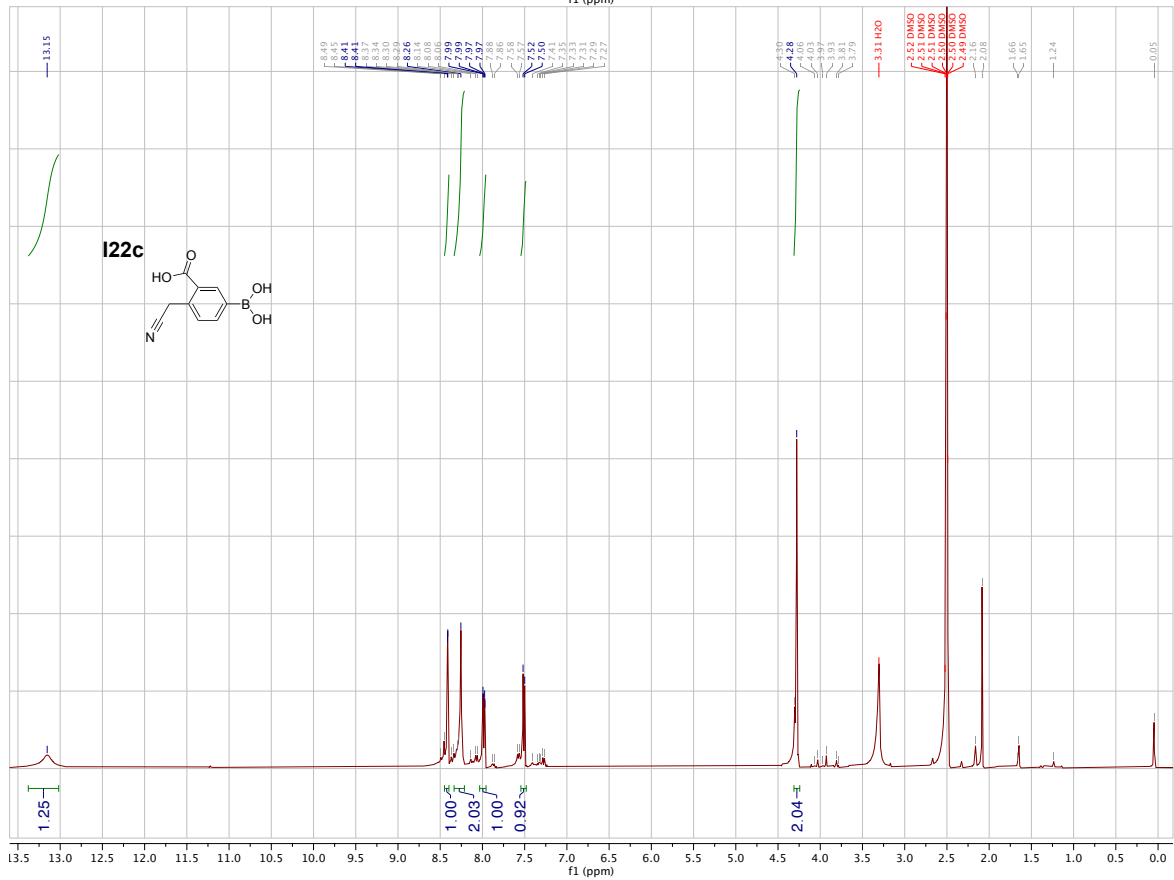

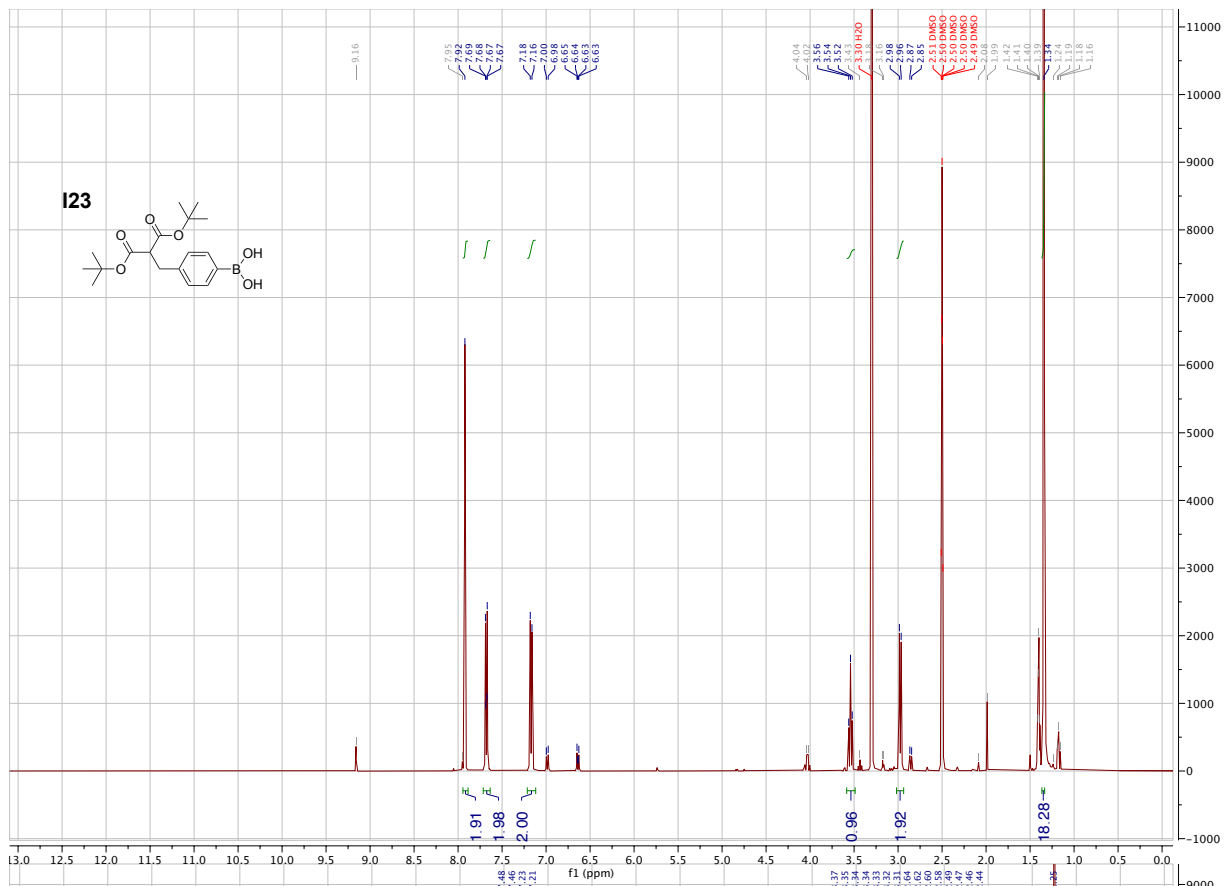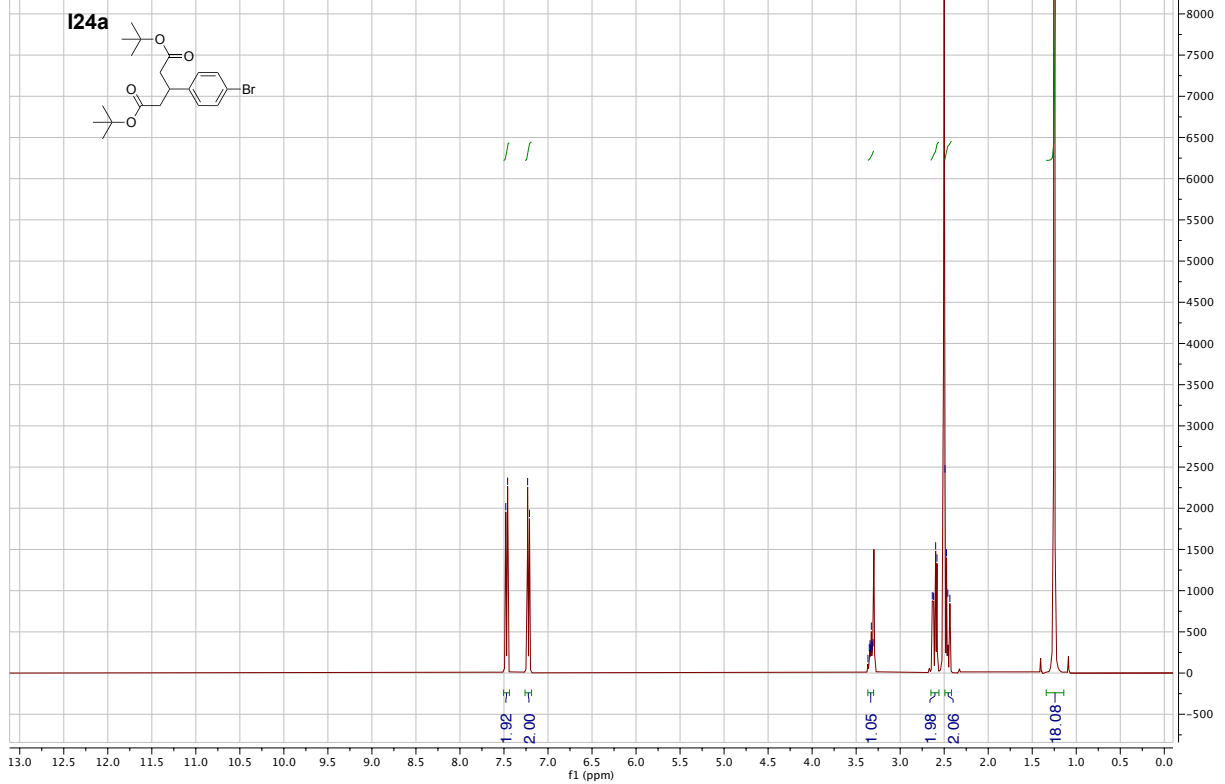

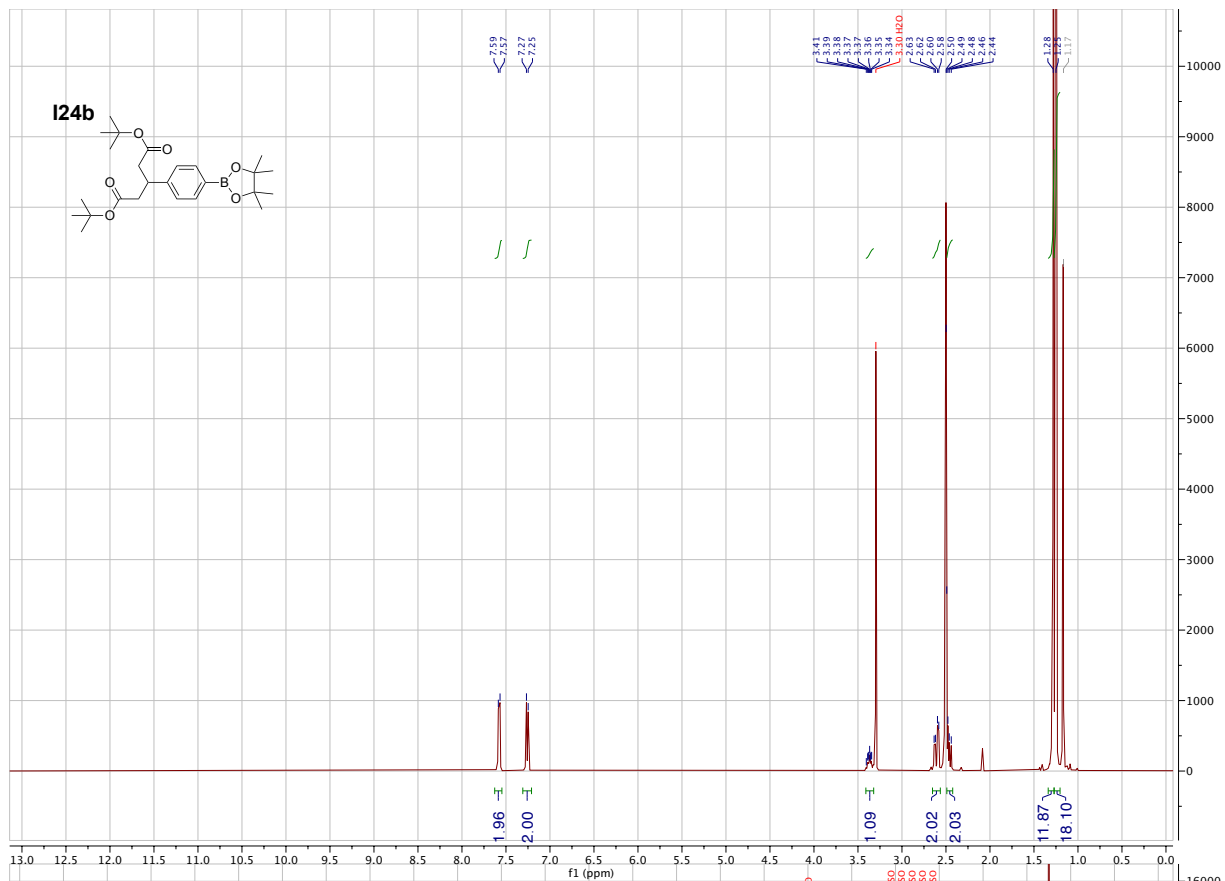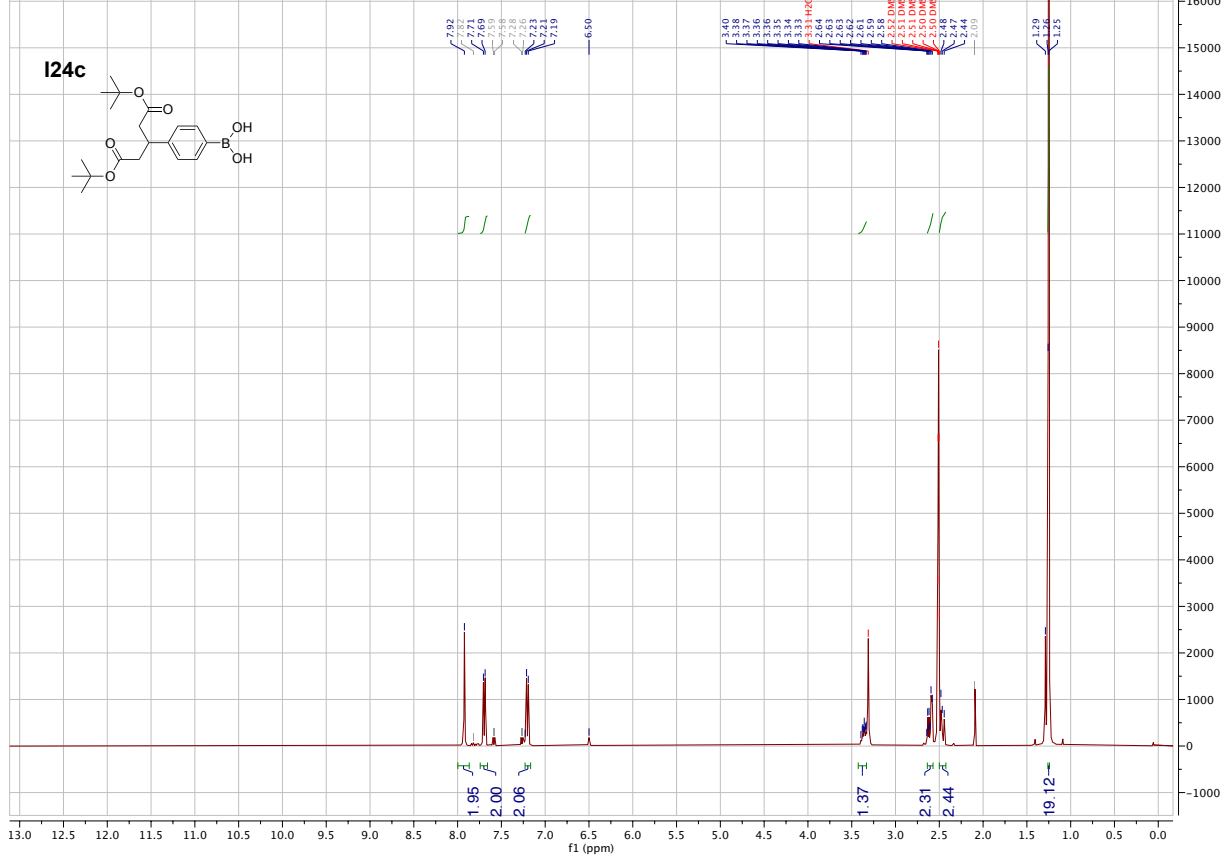

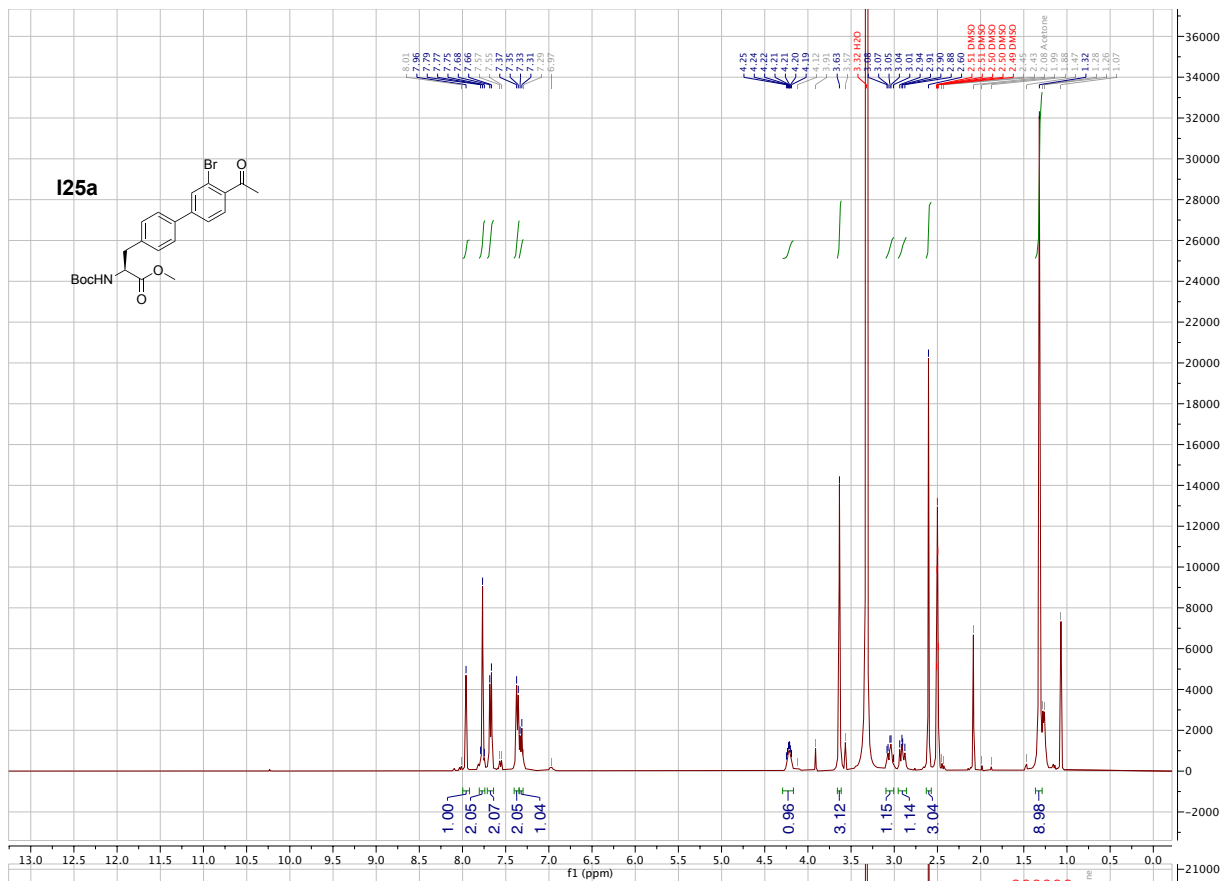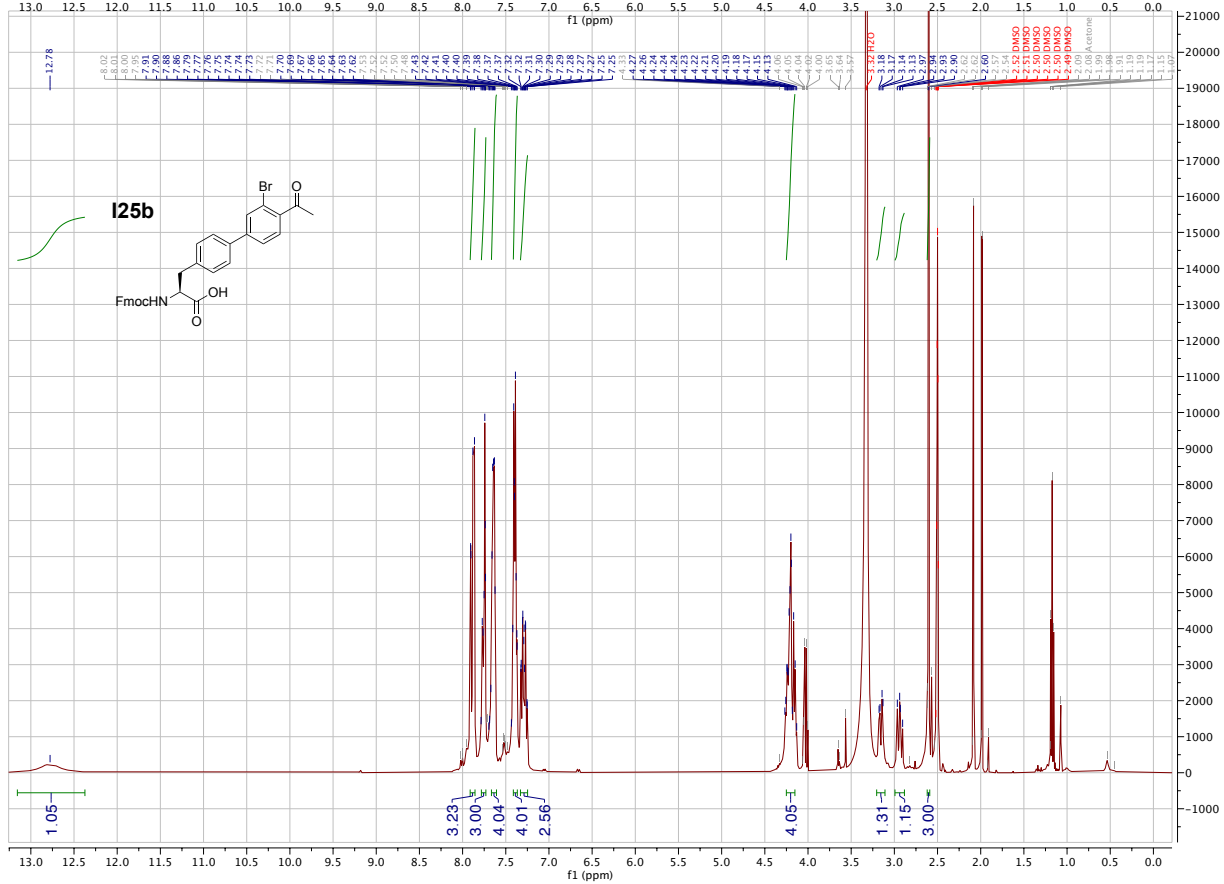



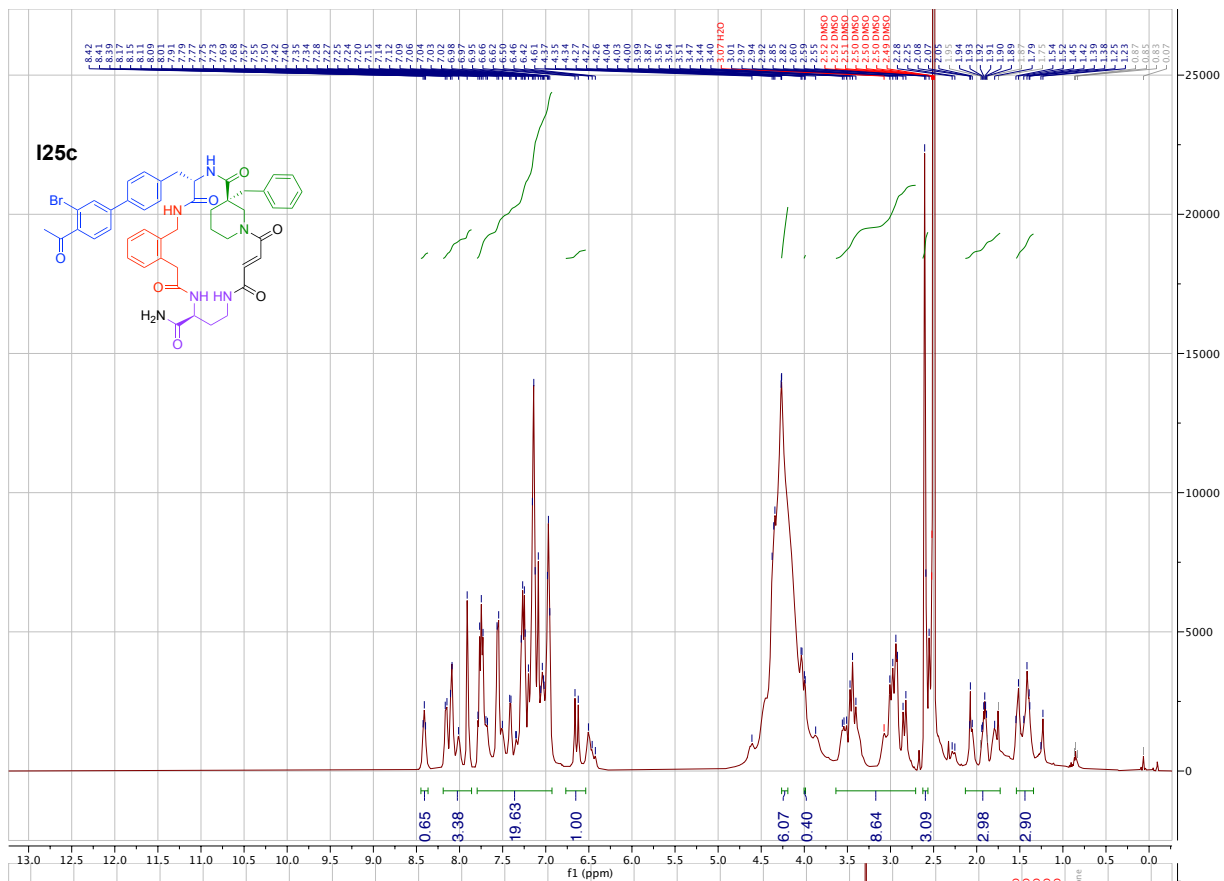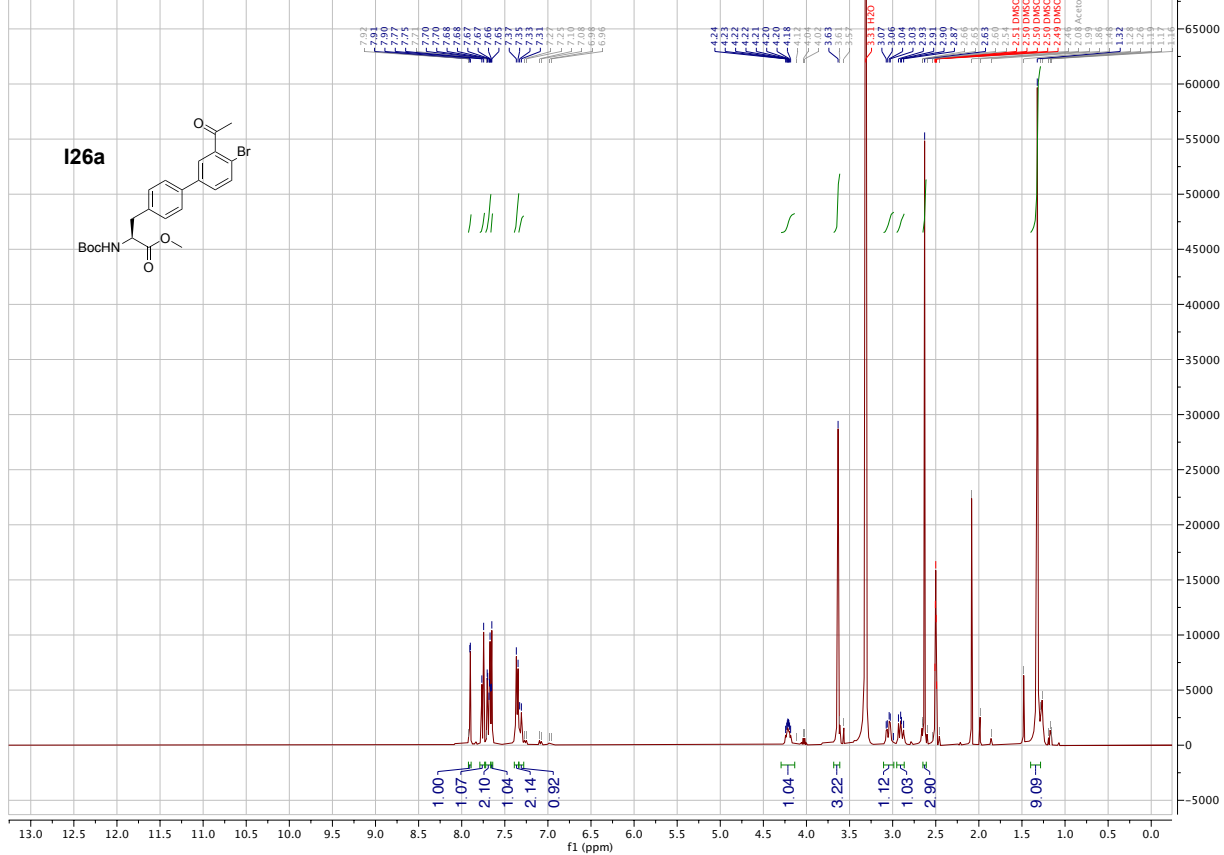

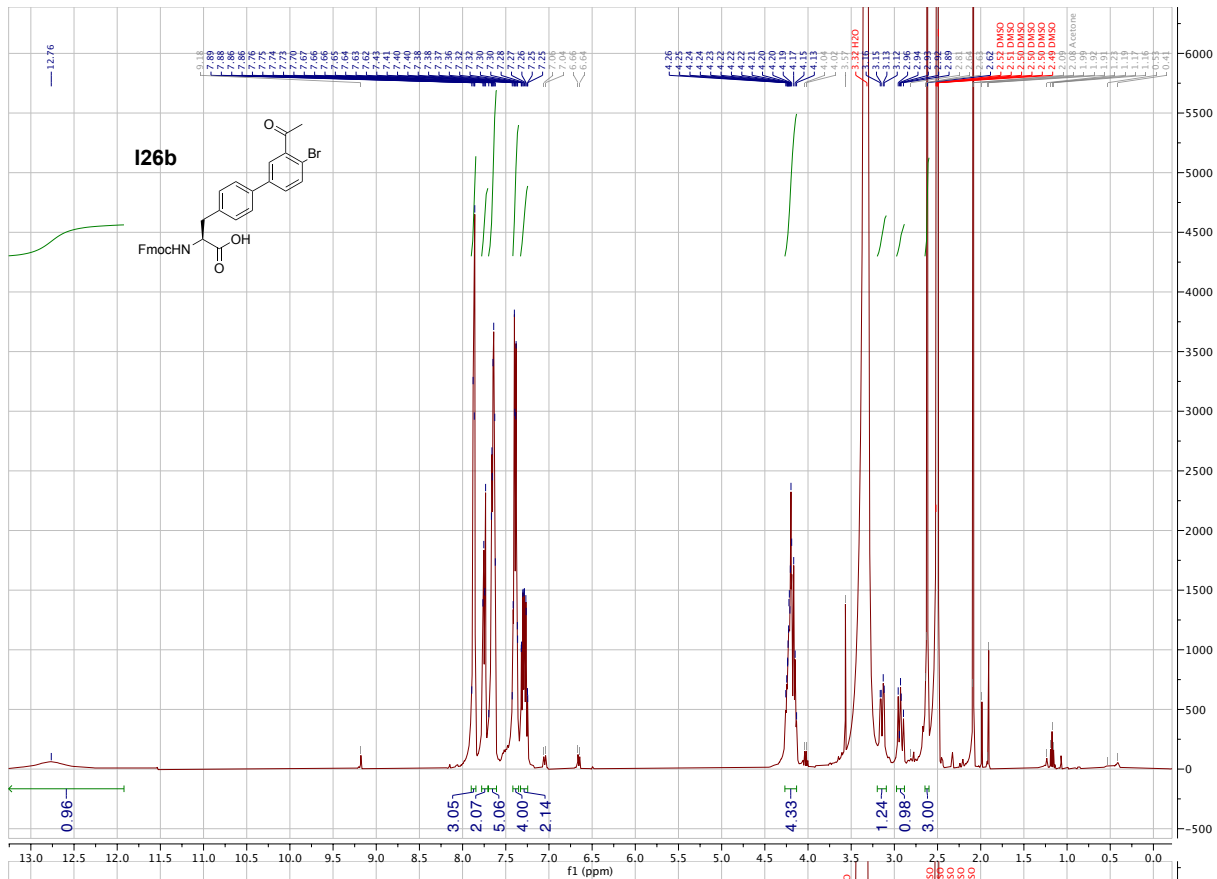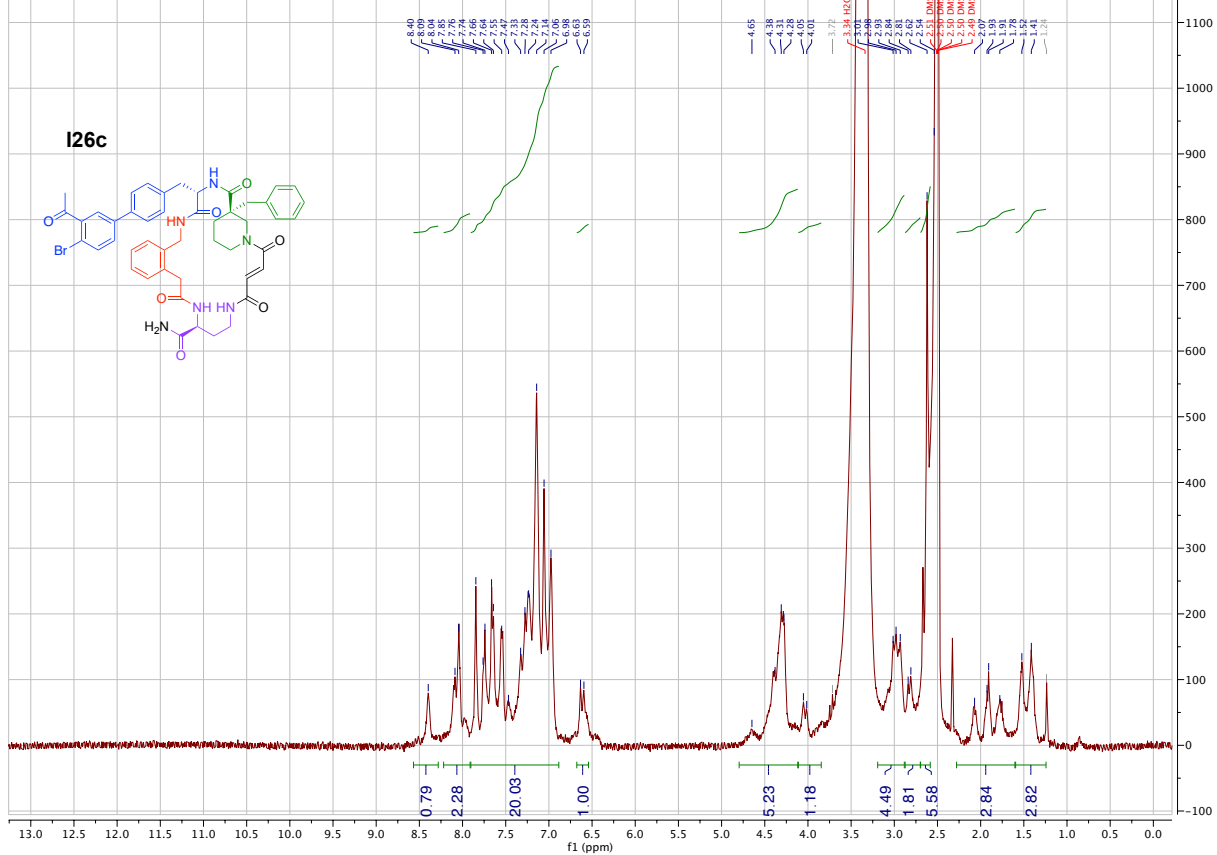

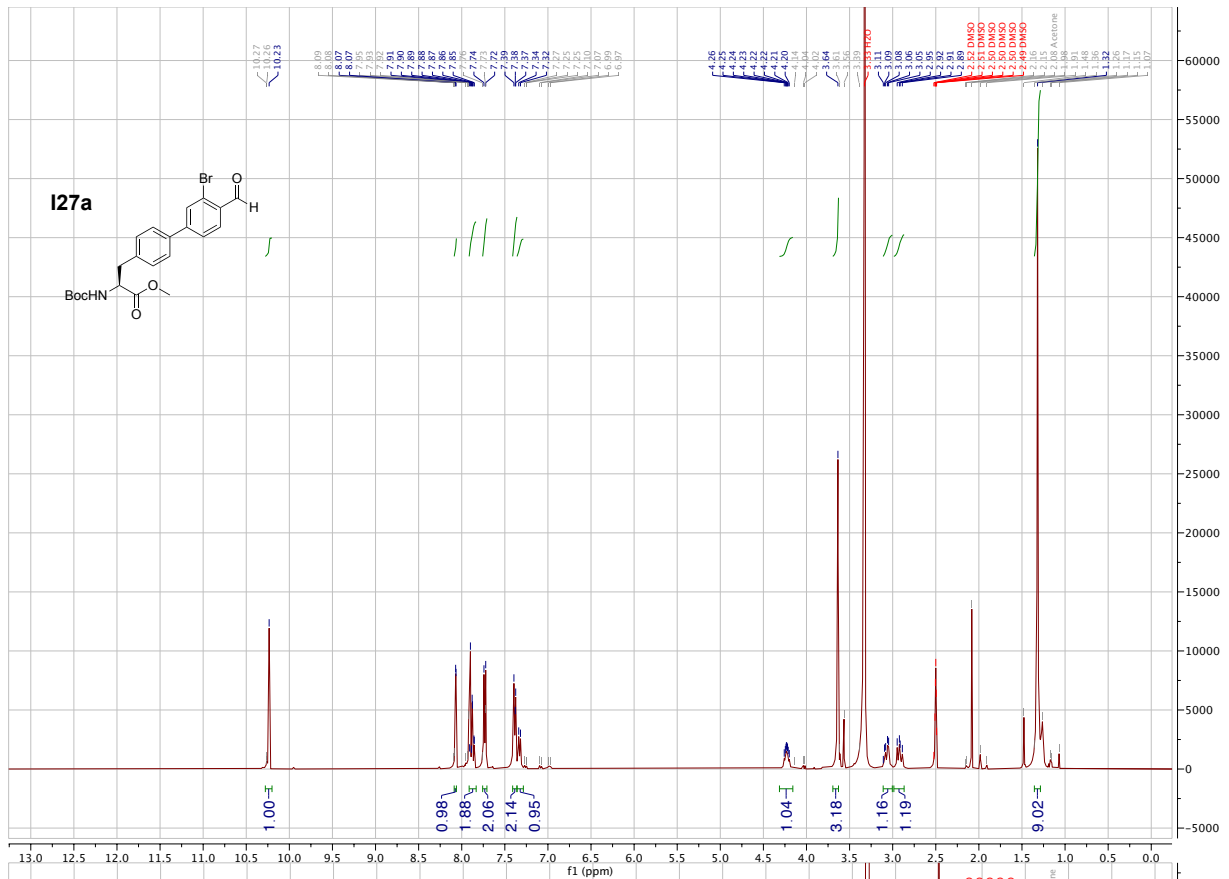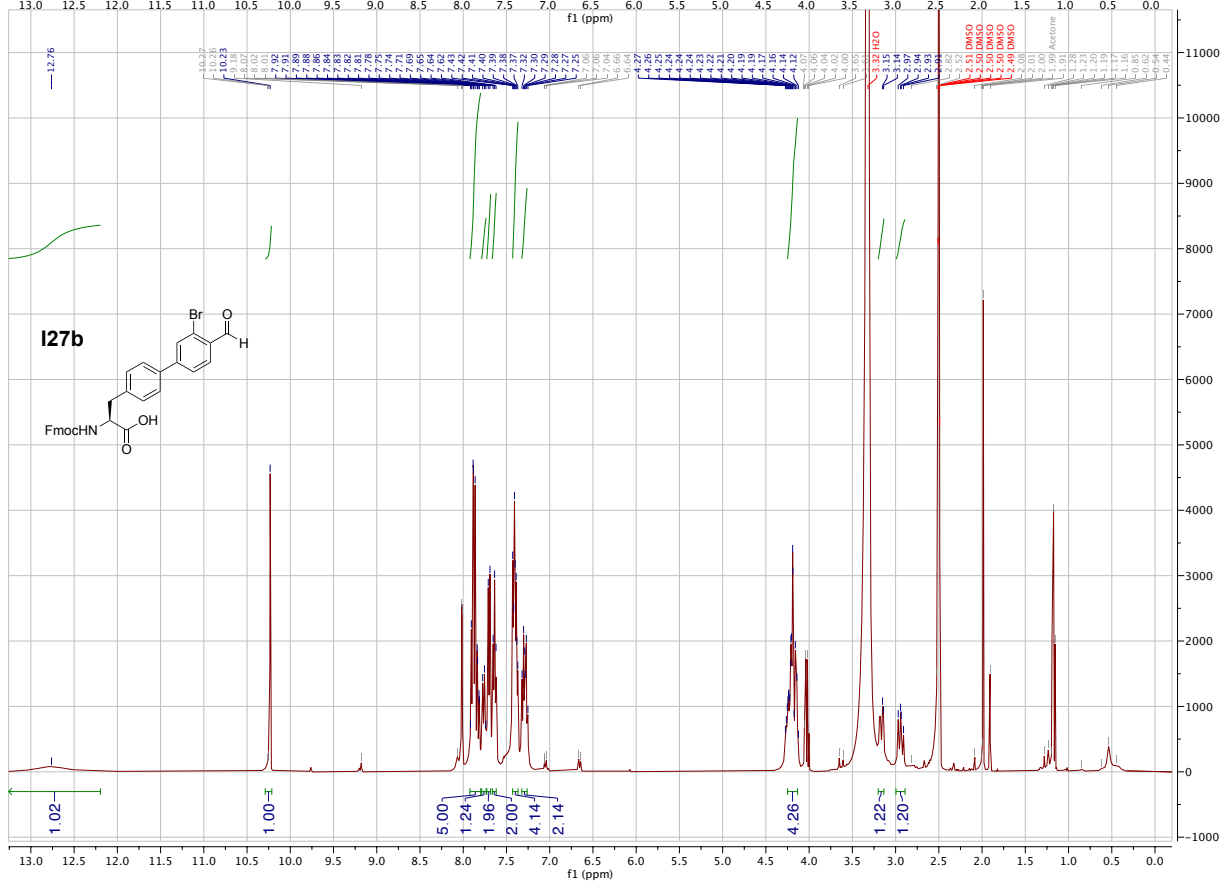





129a

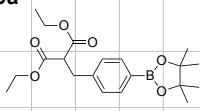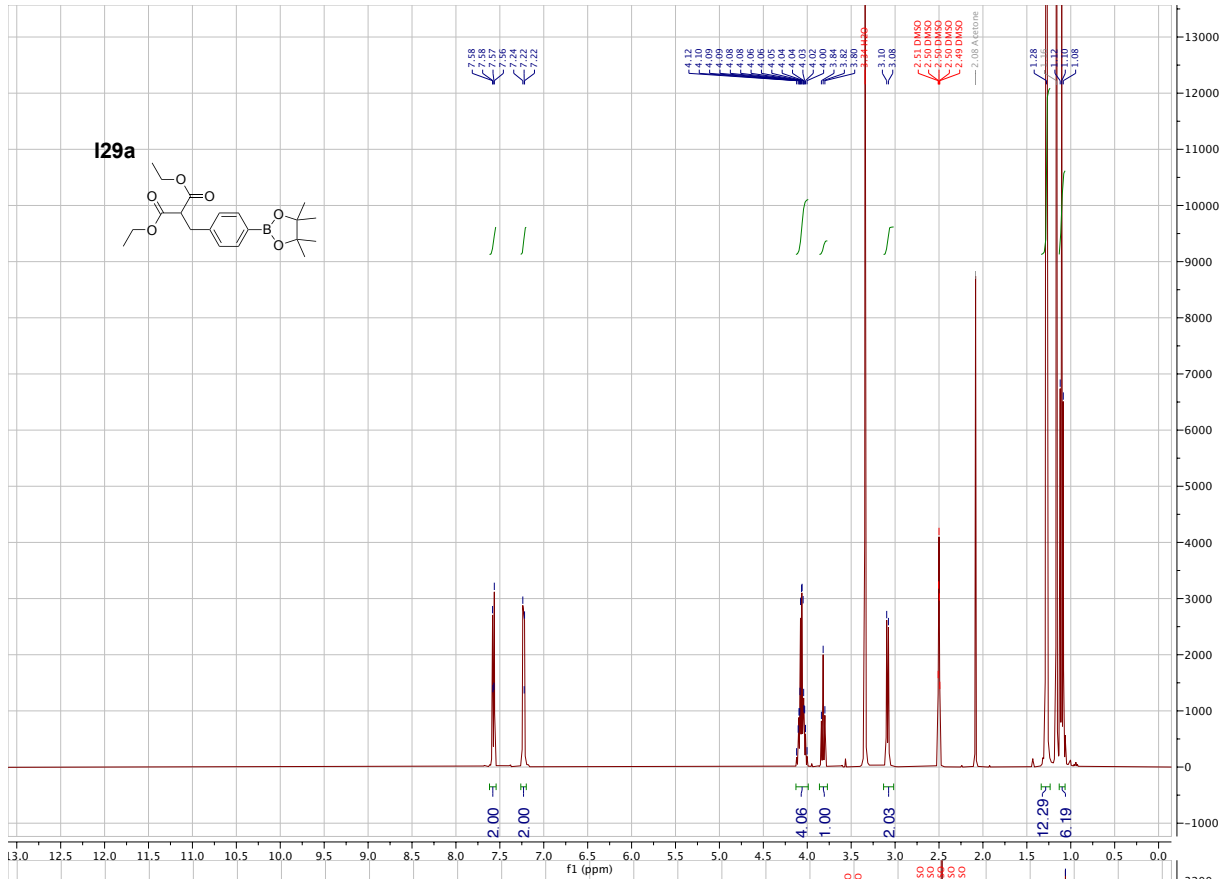

129b

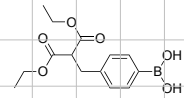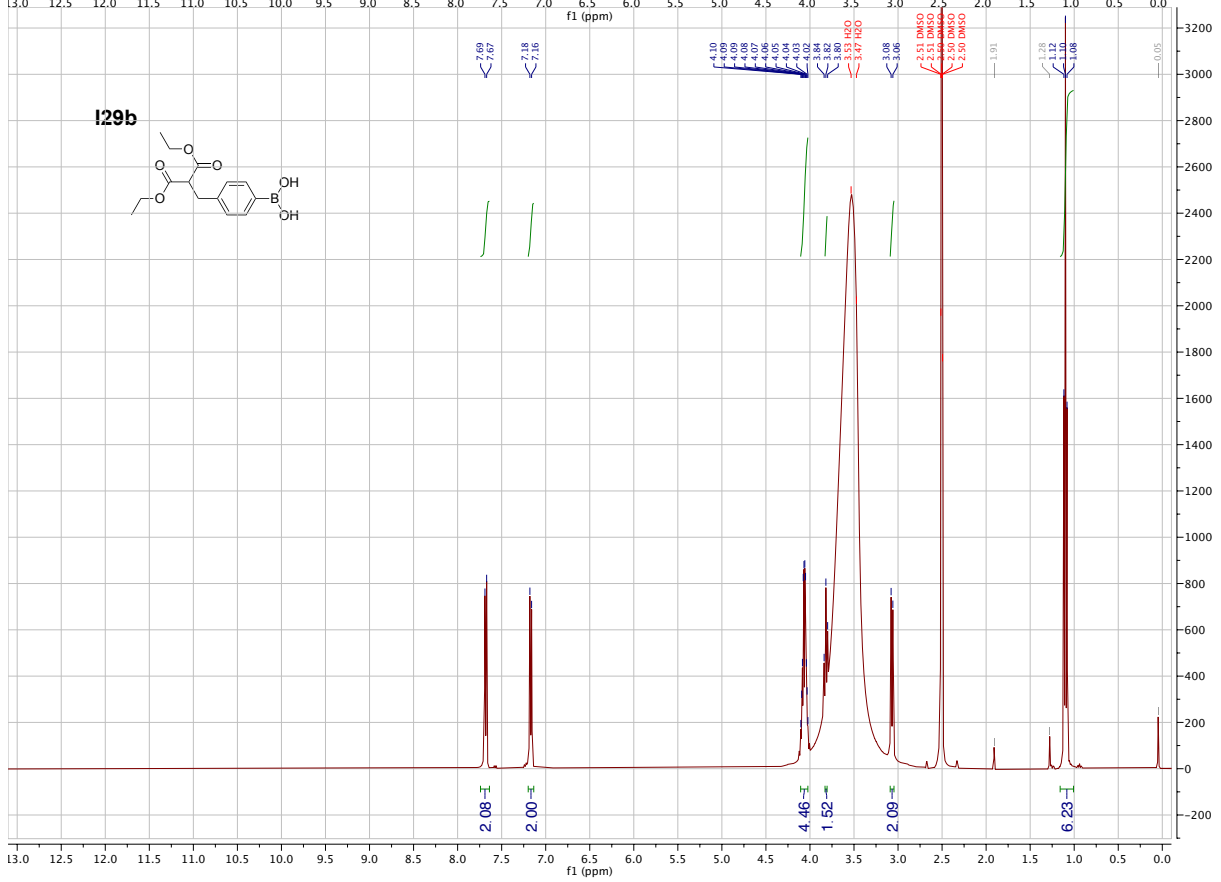



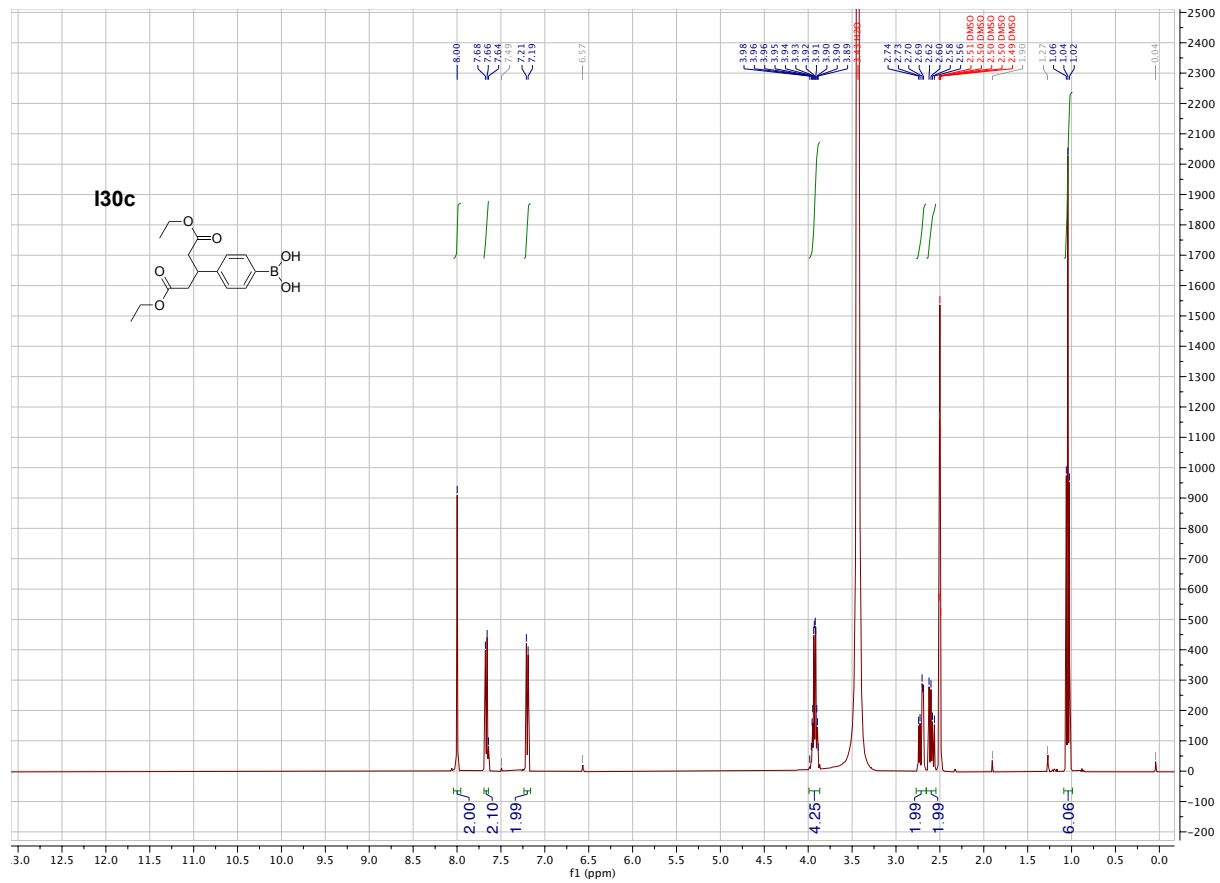





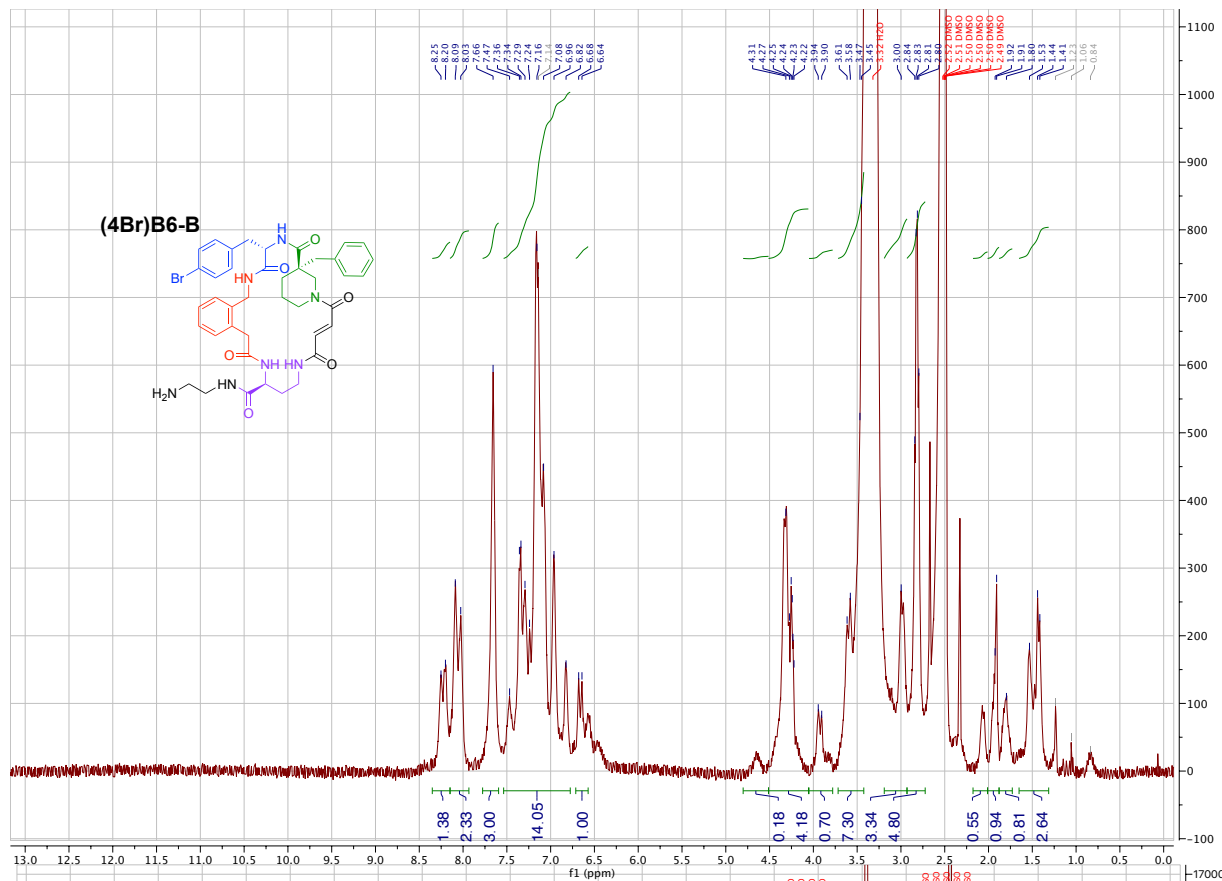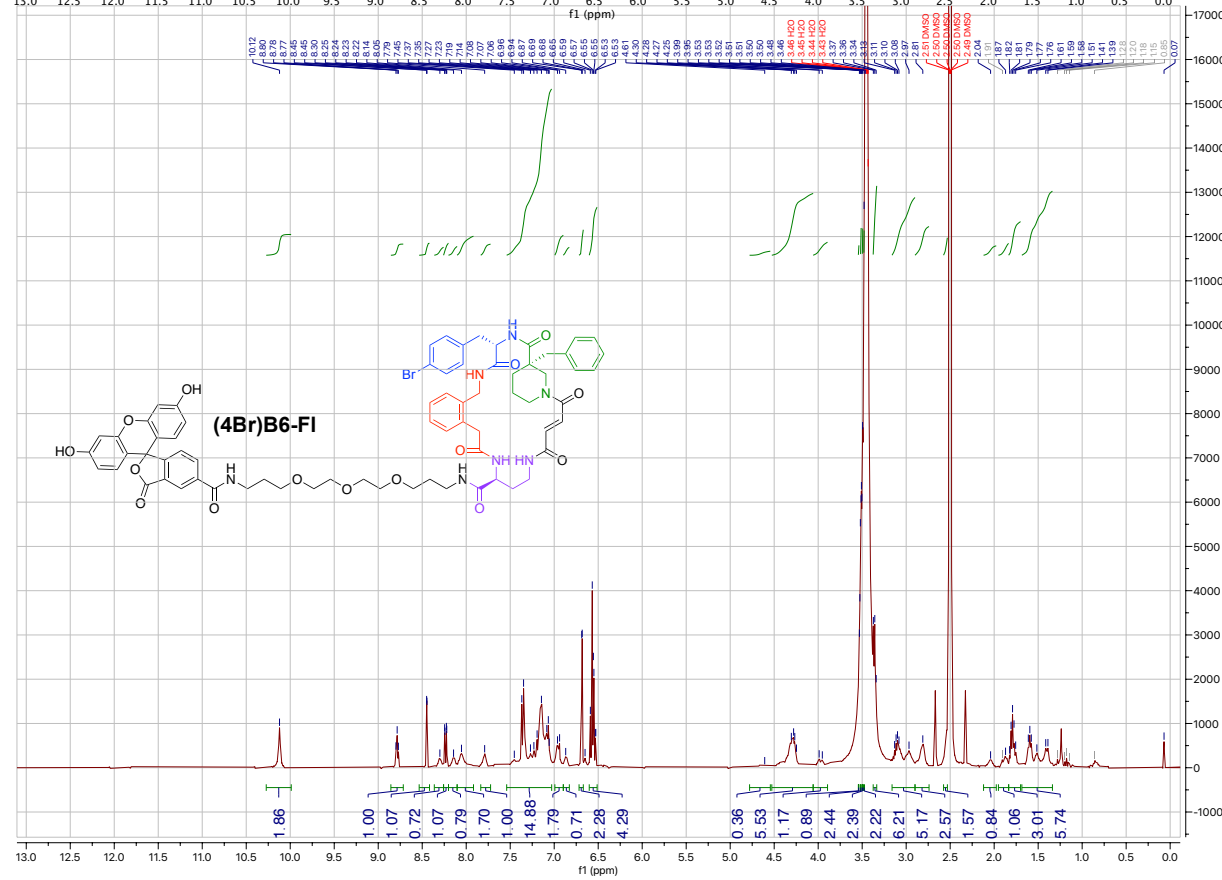

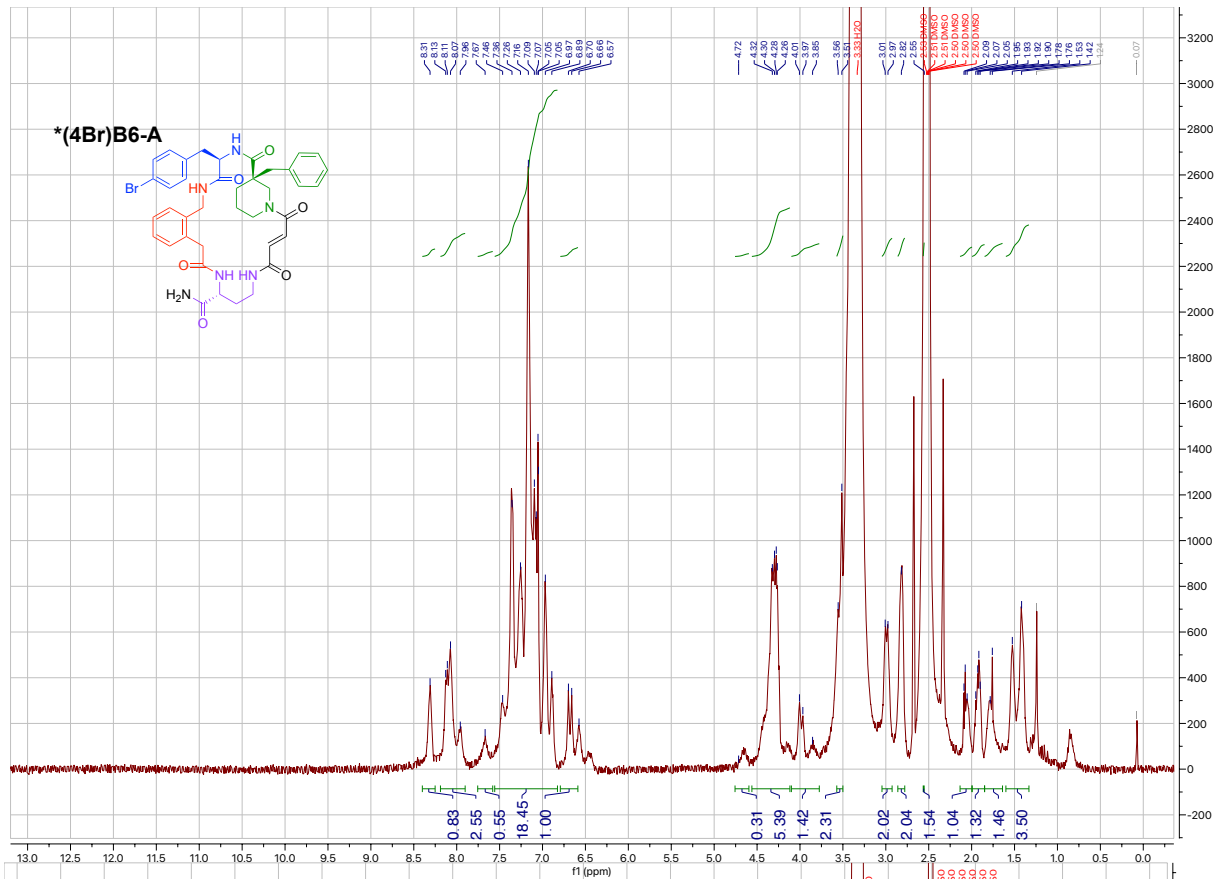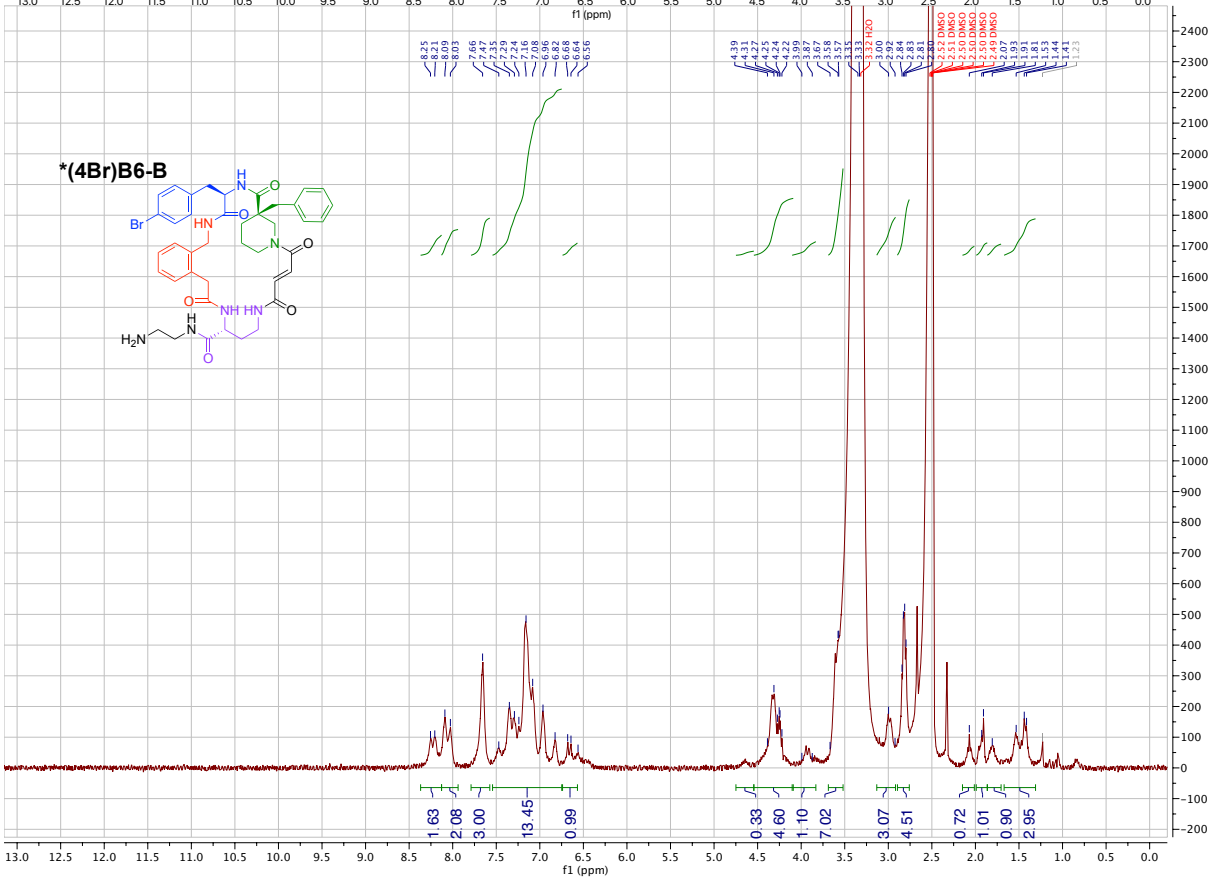

## HPLC Chromatograms

Panels from top→bottom:

1. MS trace for compound ions (M, M+H<sup>+</sup>, M+Na<sup>+</sup>)
2. MS scan trace for all ions
3. Absorbance at 214 nM
4. Absorbance at 230 nM
5. Absorbance at 254 nM
6. Absorbance at 280 nM
7. Solvent gradient, with % acetonitrile shown on y-axis
8. Extracted ion chromatogram for M+H<sup>+</sup> ion

Purity of compound was determined by % area of the indicated compound peak at 214 nM relative to all identified peaks between 3 and 17 minutes. DMSO peak occurs at 1.5 minutes.

**JOMBt**

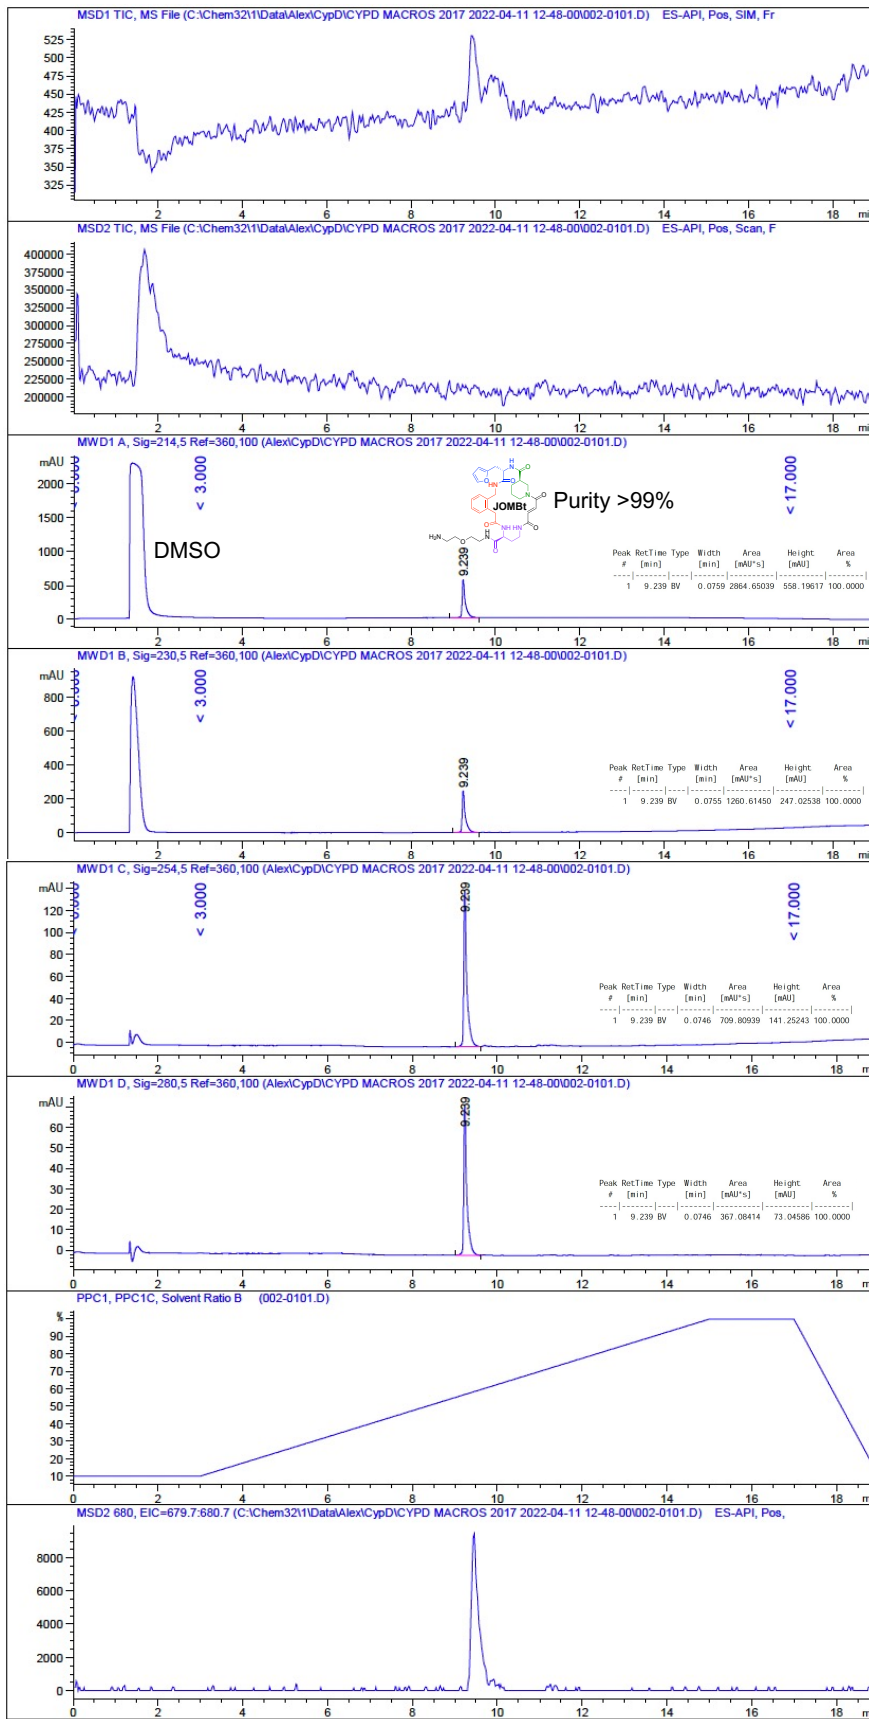

A26

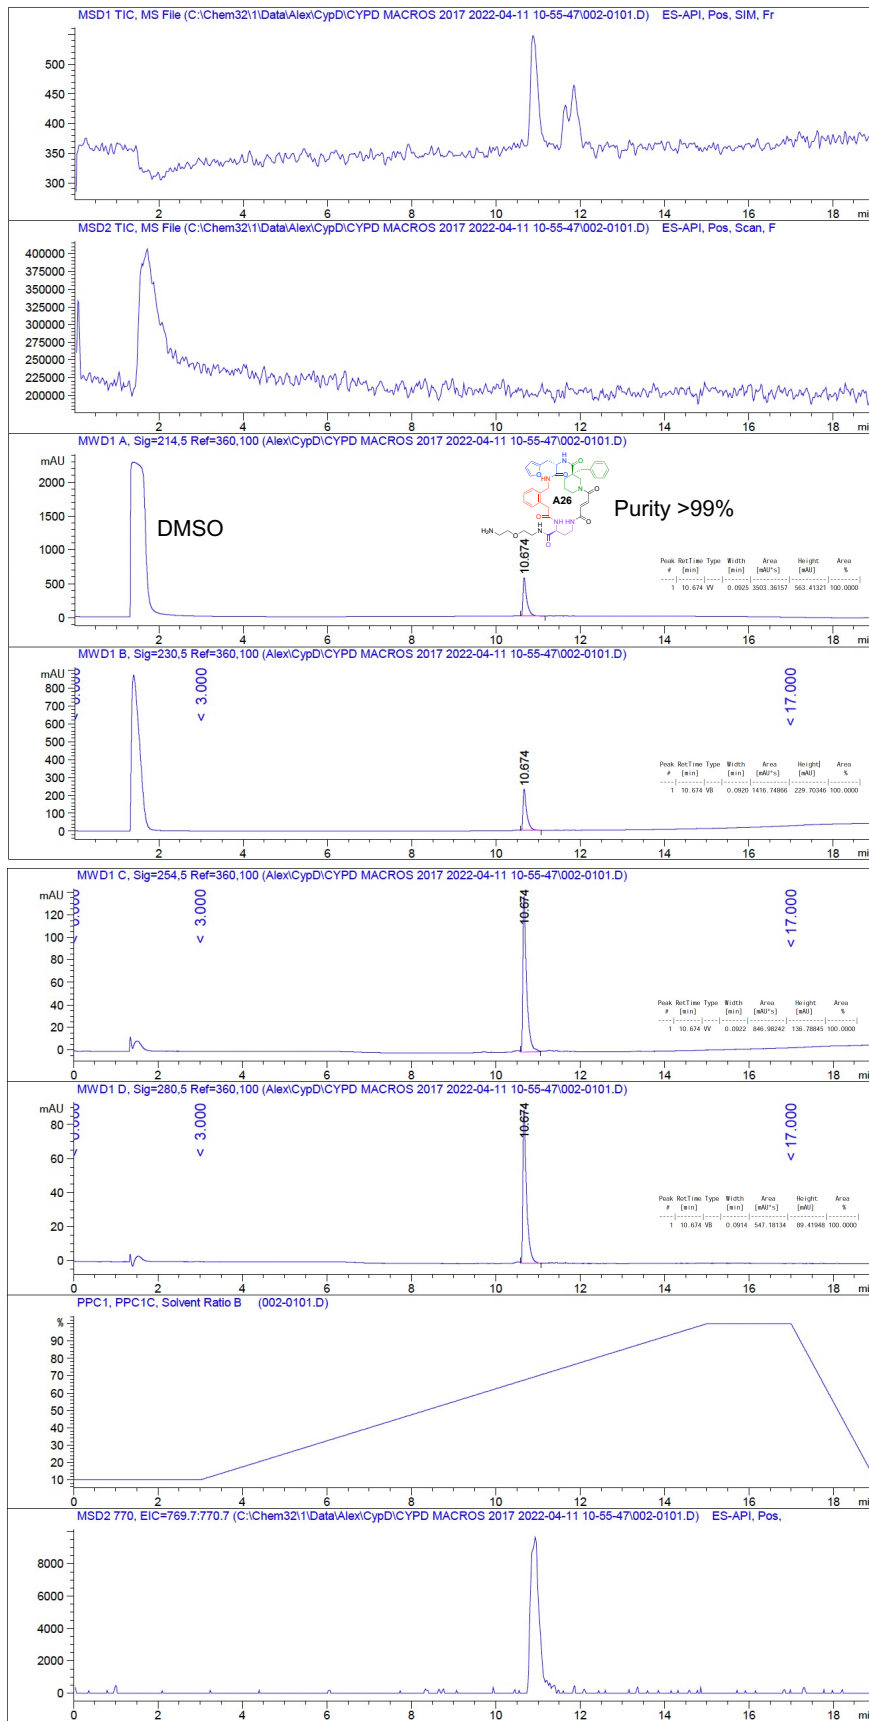

B1

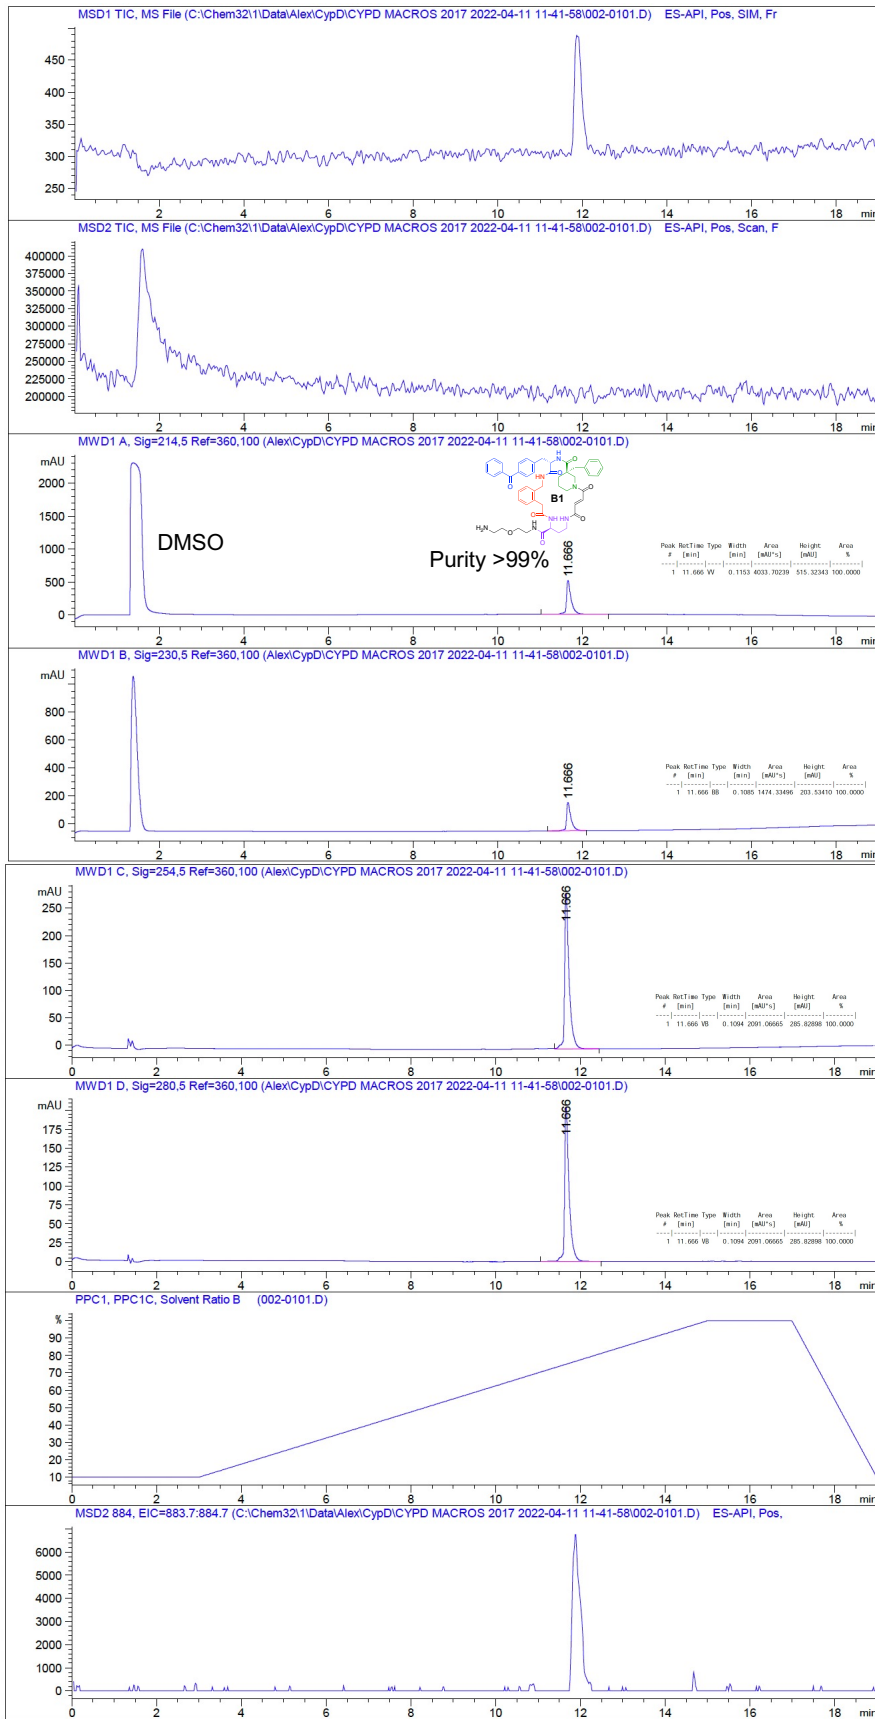

B2

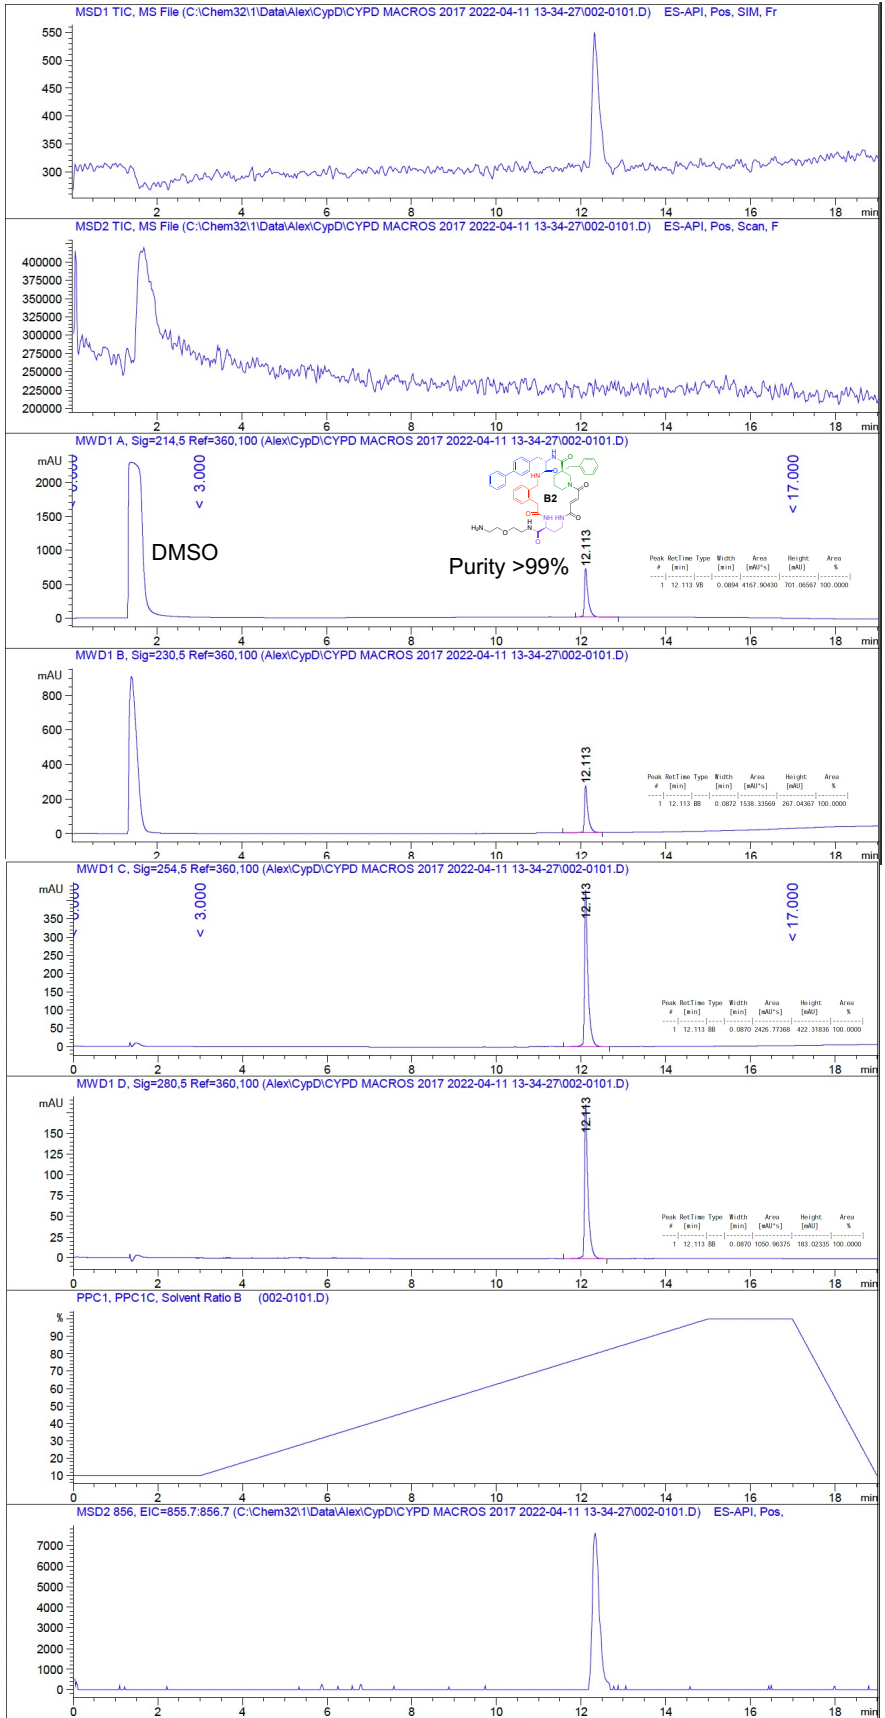



**B23**

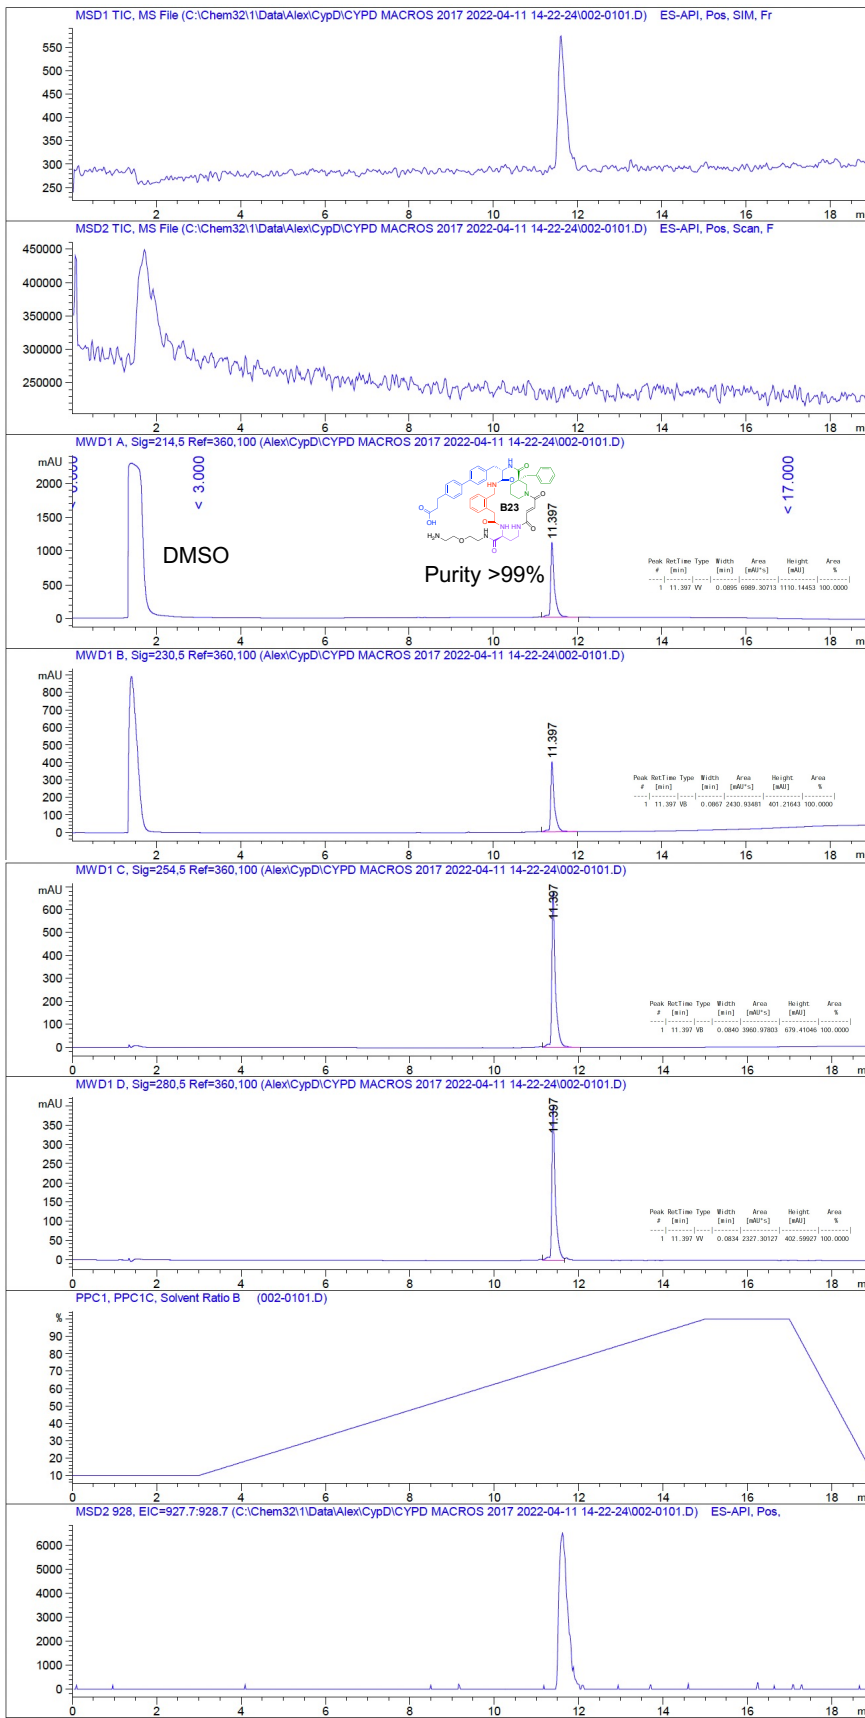



**B32**

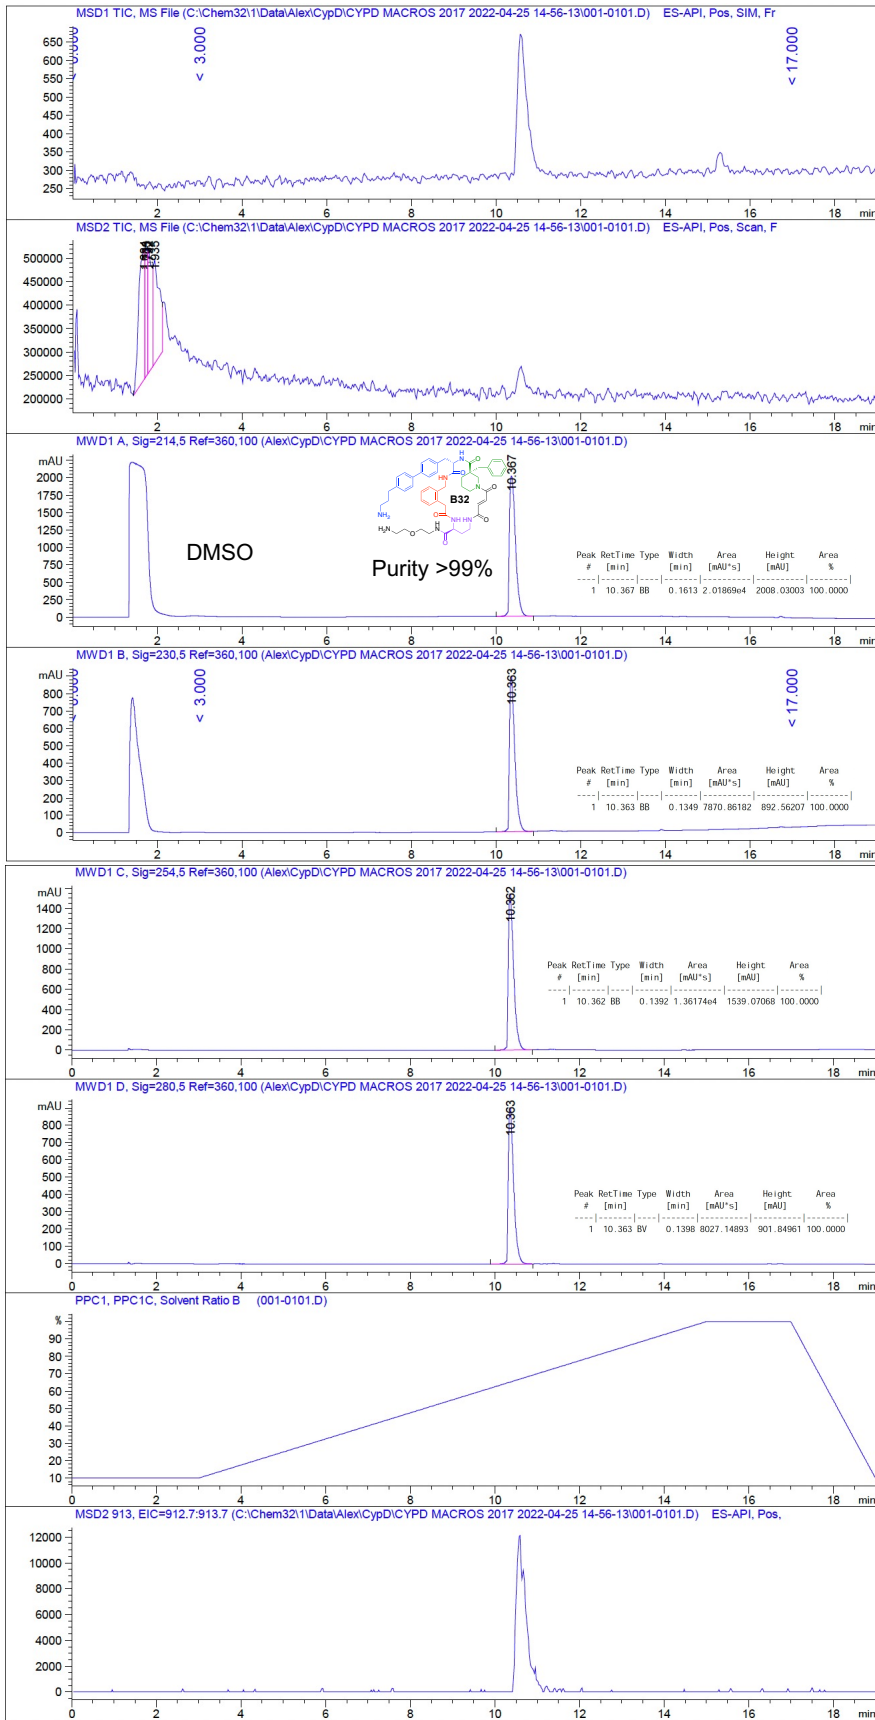

# B52 (used for independent replicate 1)

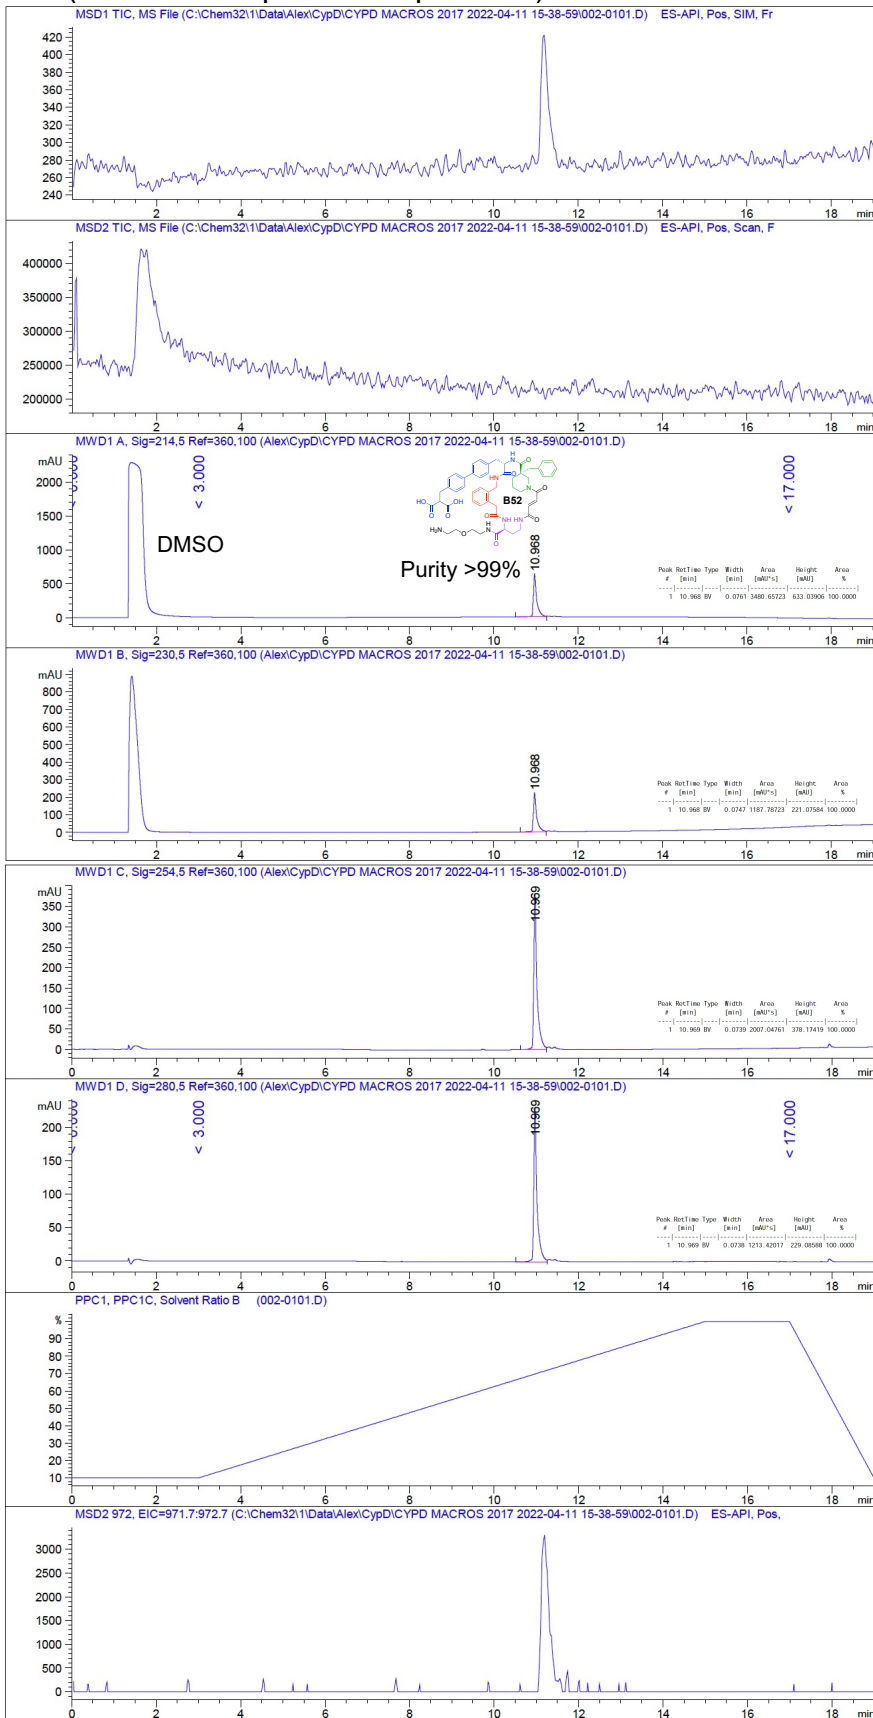



# B53 (used for independent replicate 1)

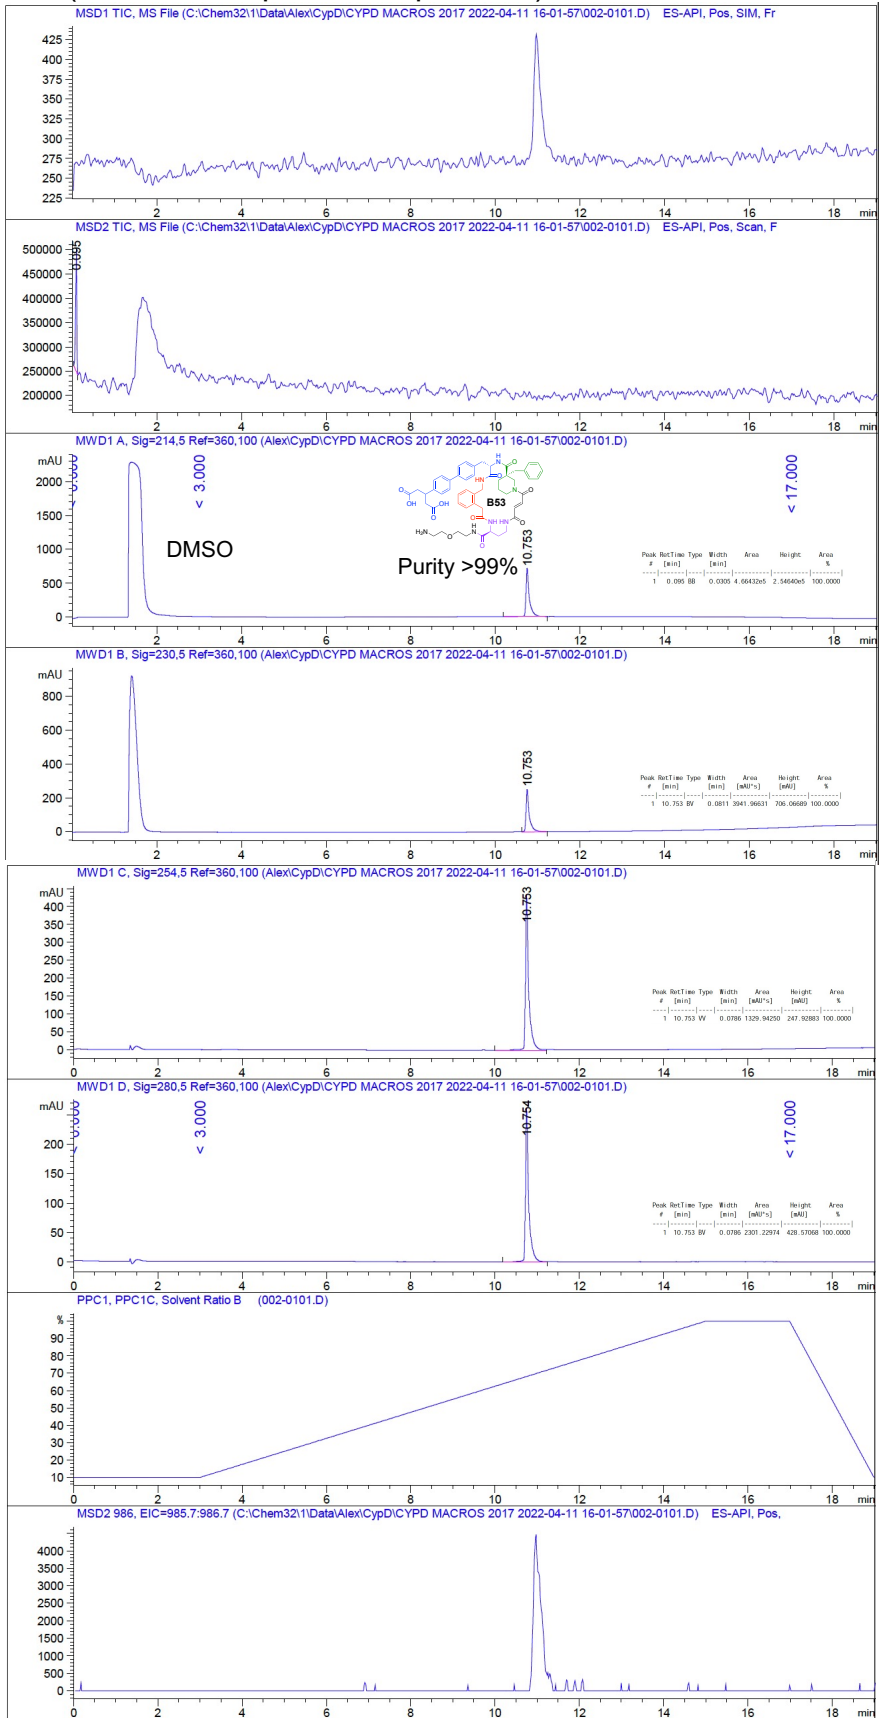

# B53 (used for independent replicate 2, 3 and 4)

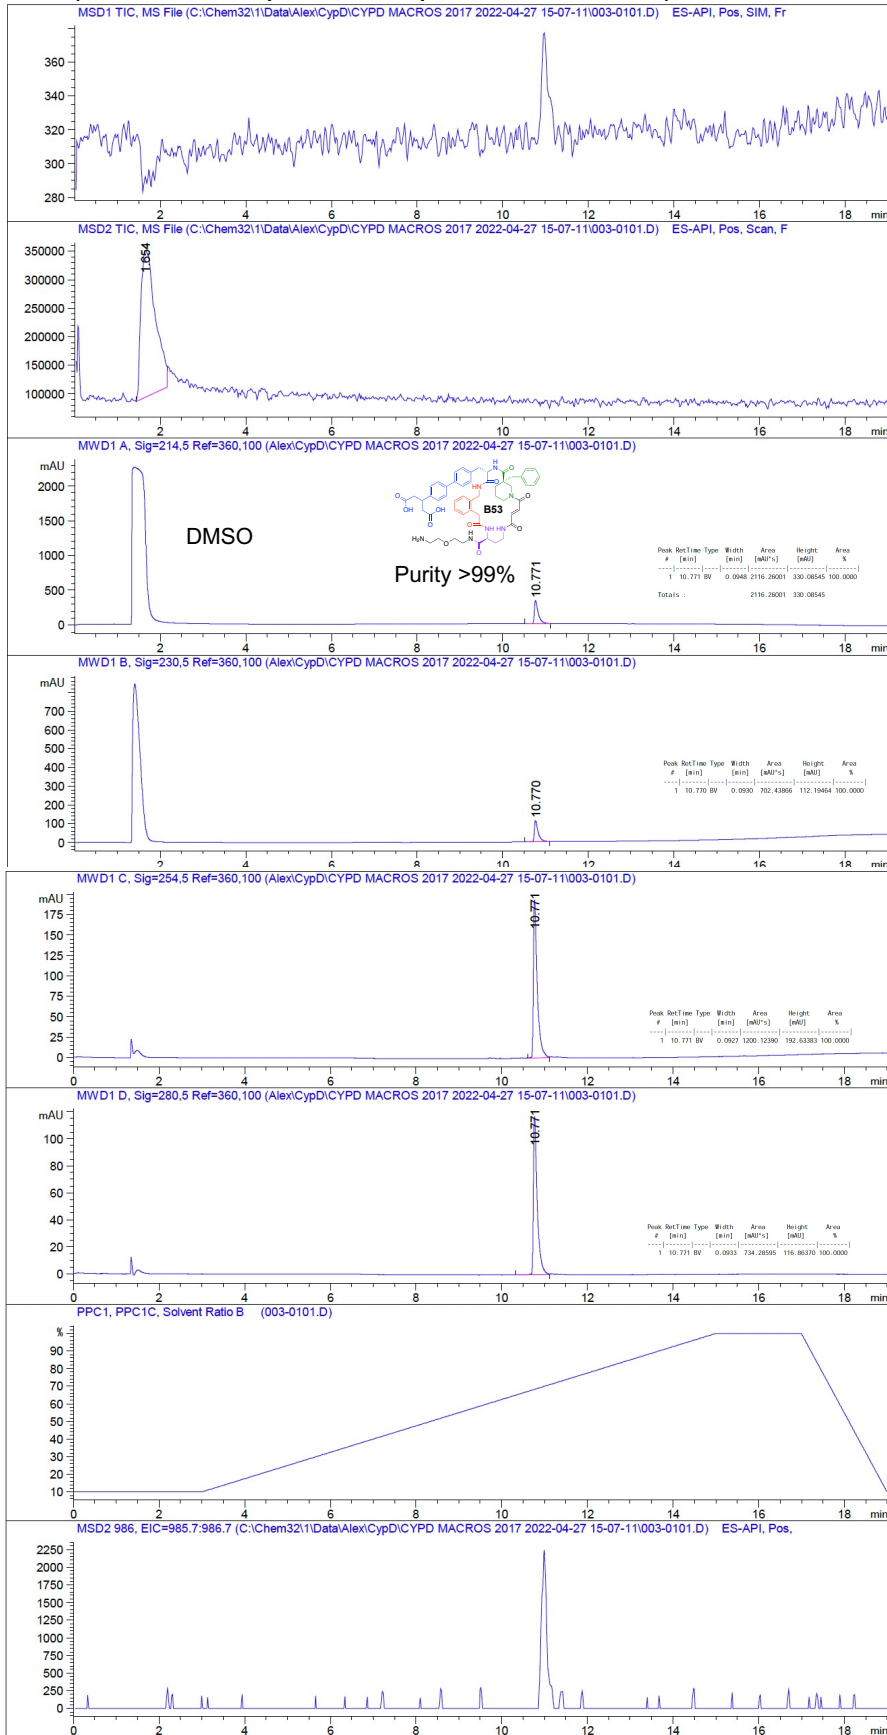

# C3A (used for independent replicate 1)

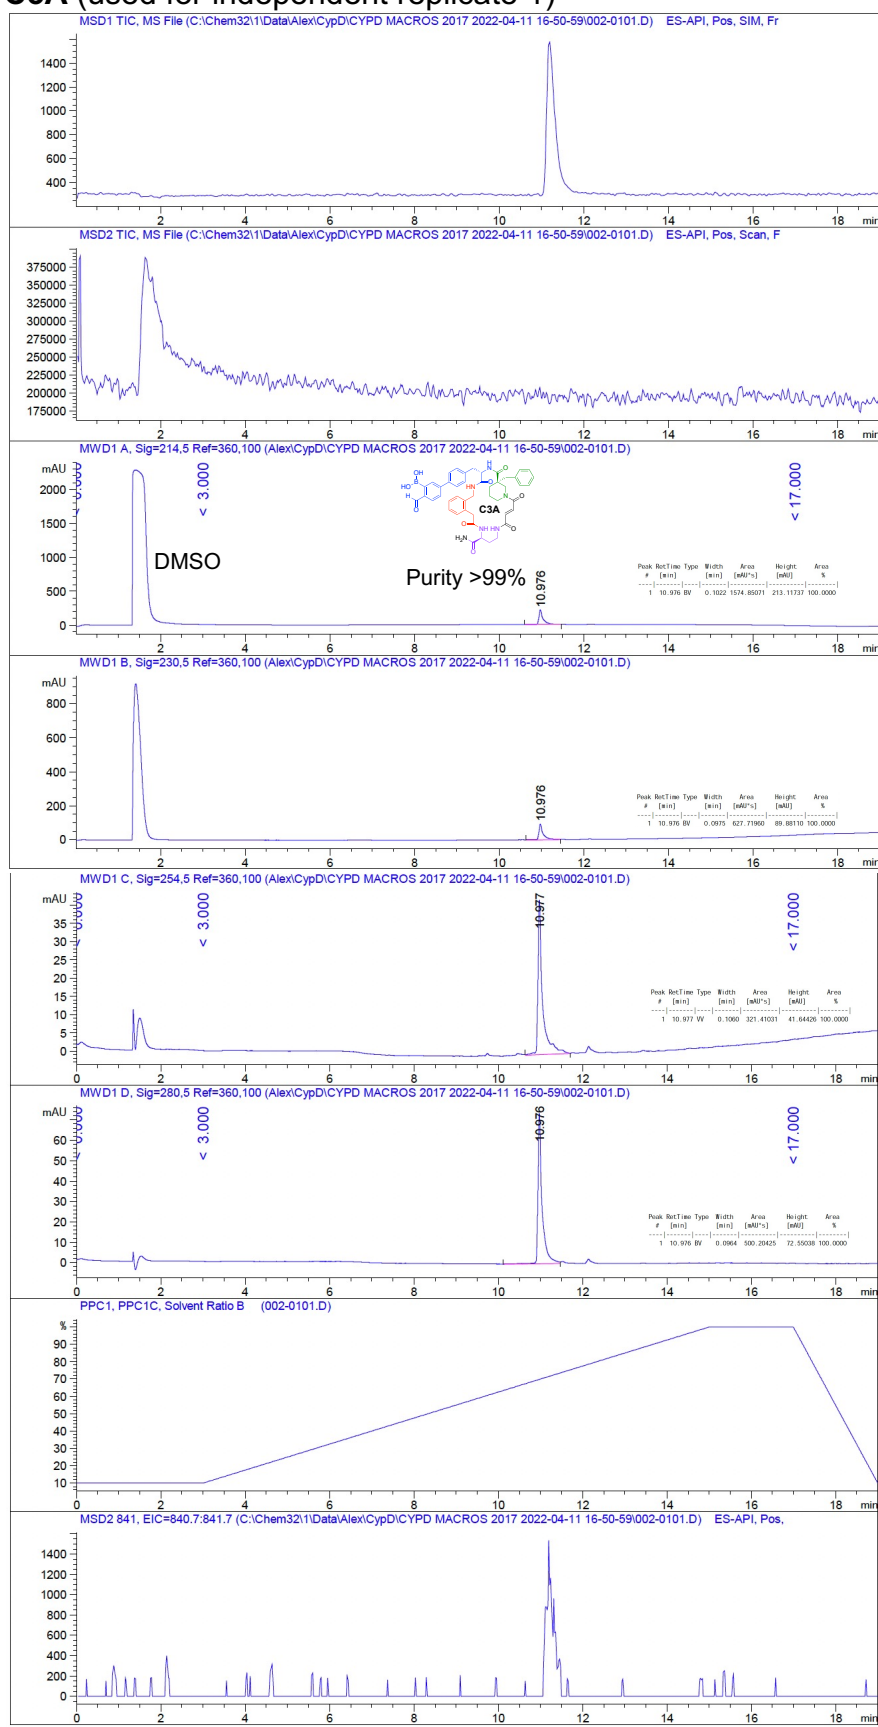



# C3A (used for independent replicate 2, 3 and 4)

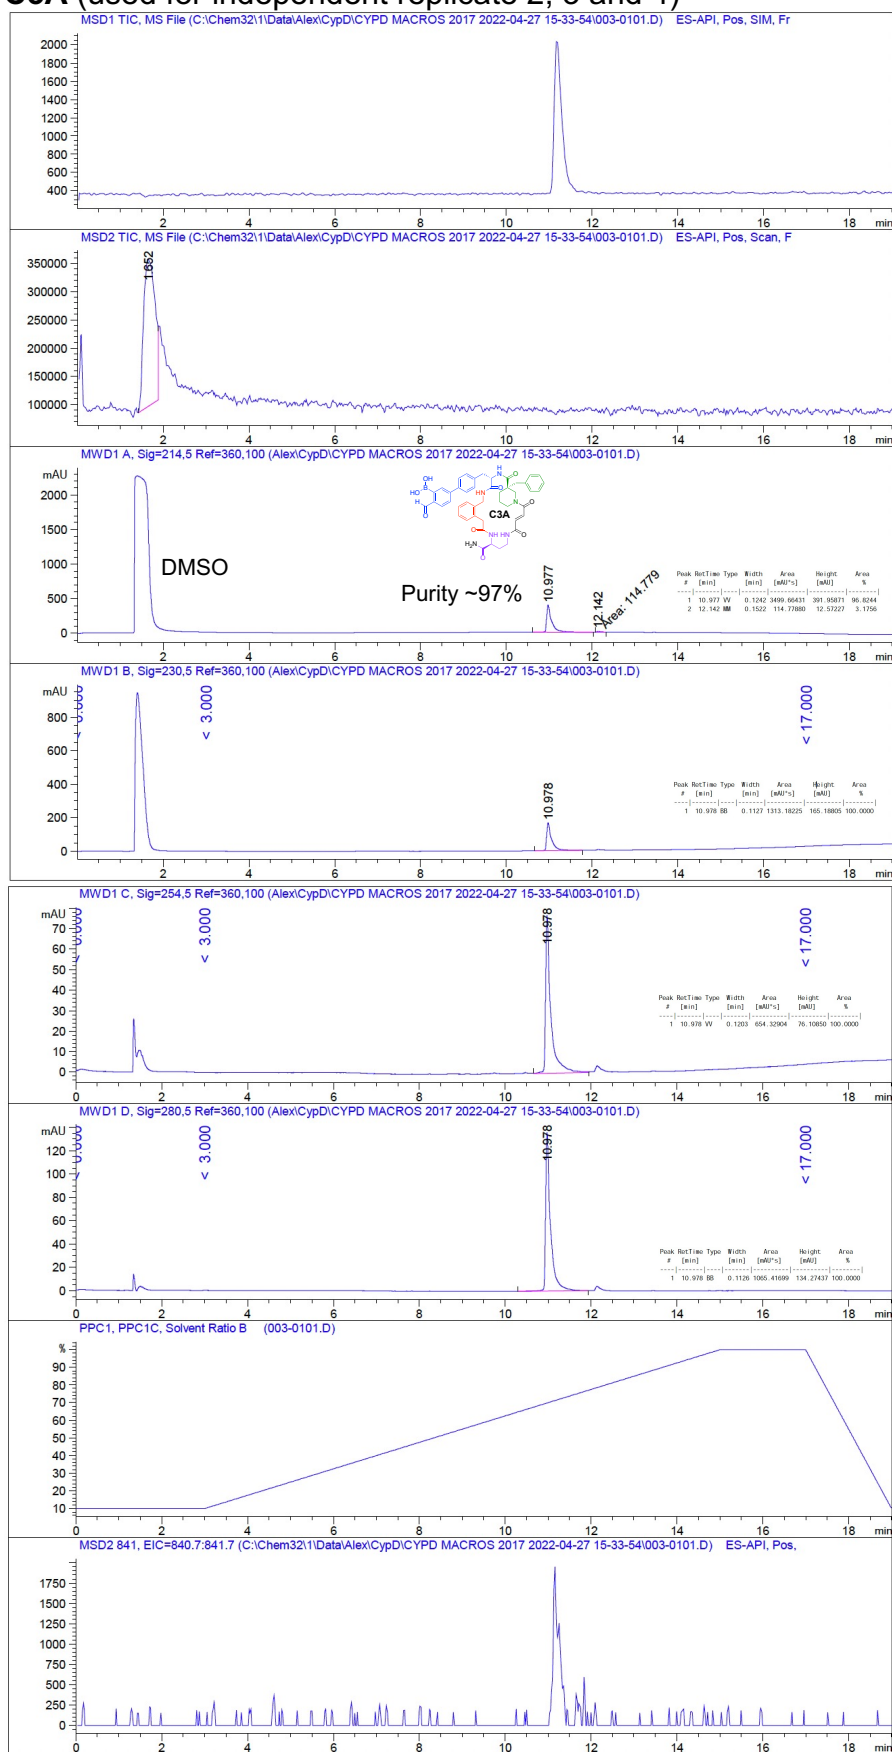

# B52-Cy5

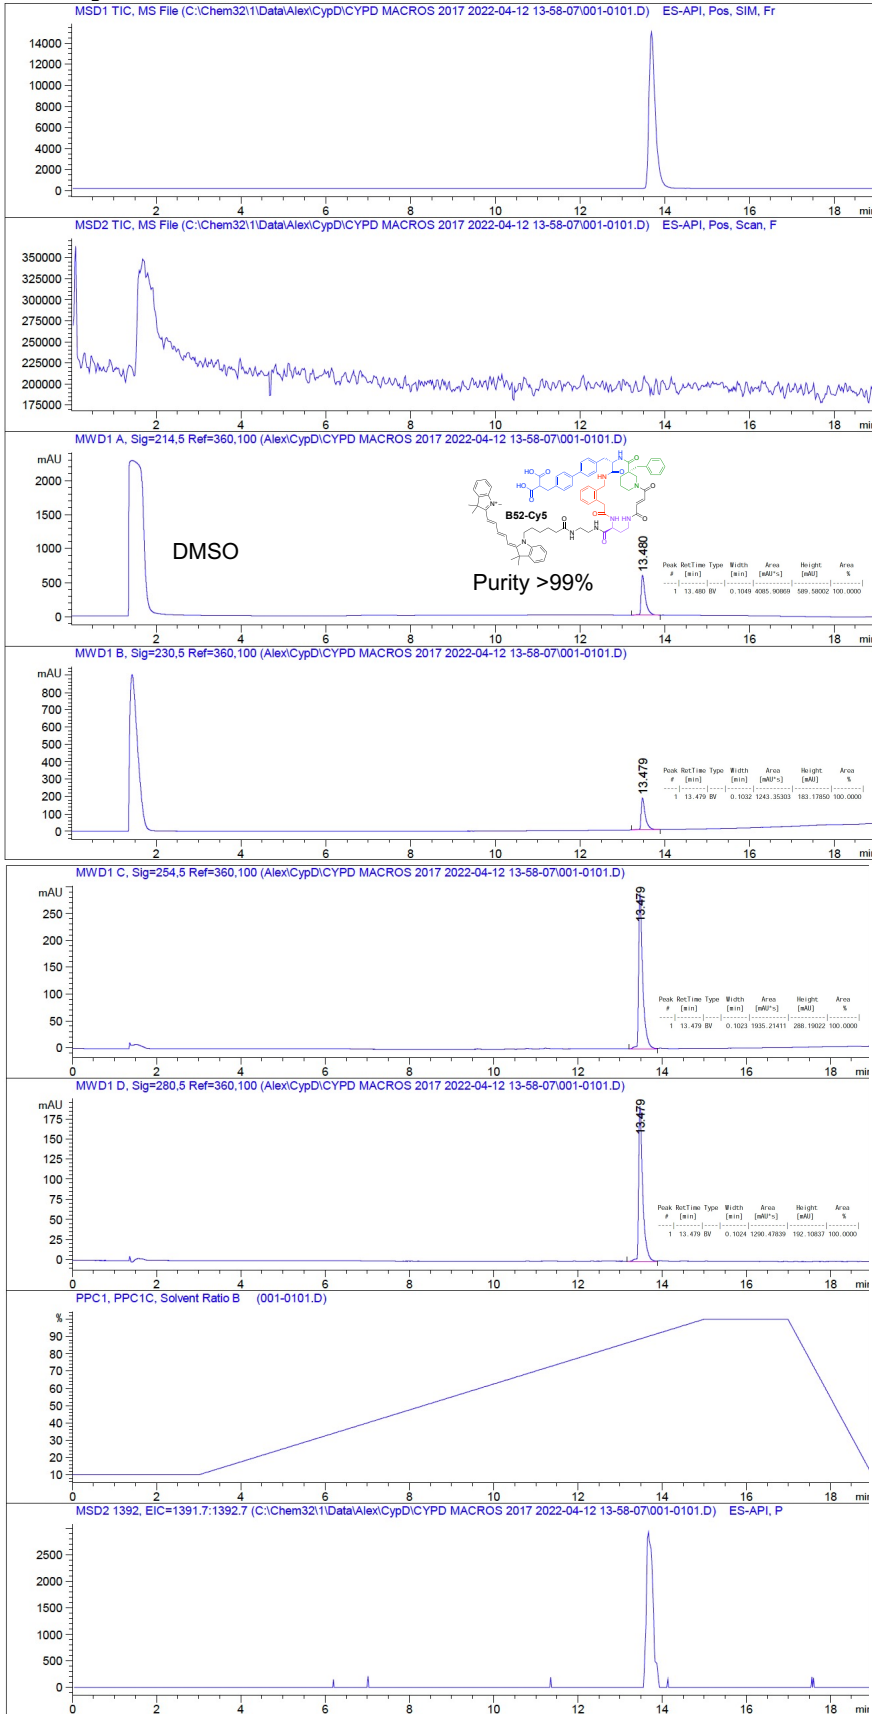

# B53-Cy5

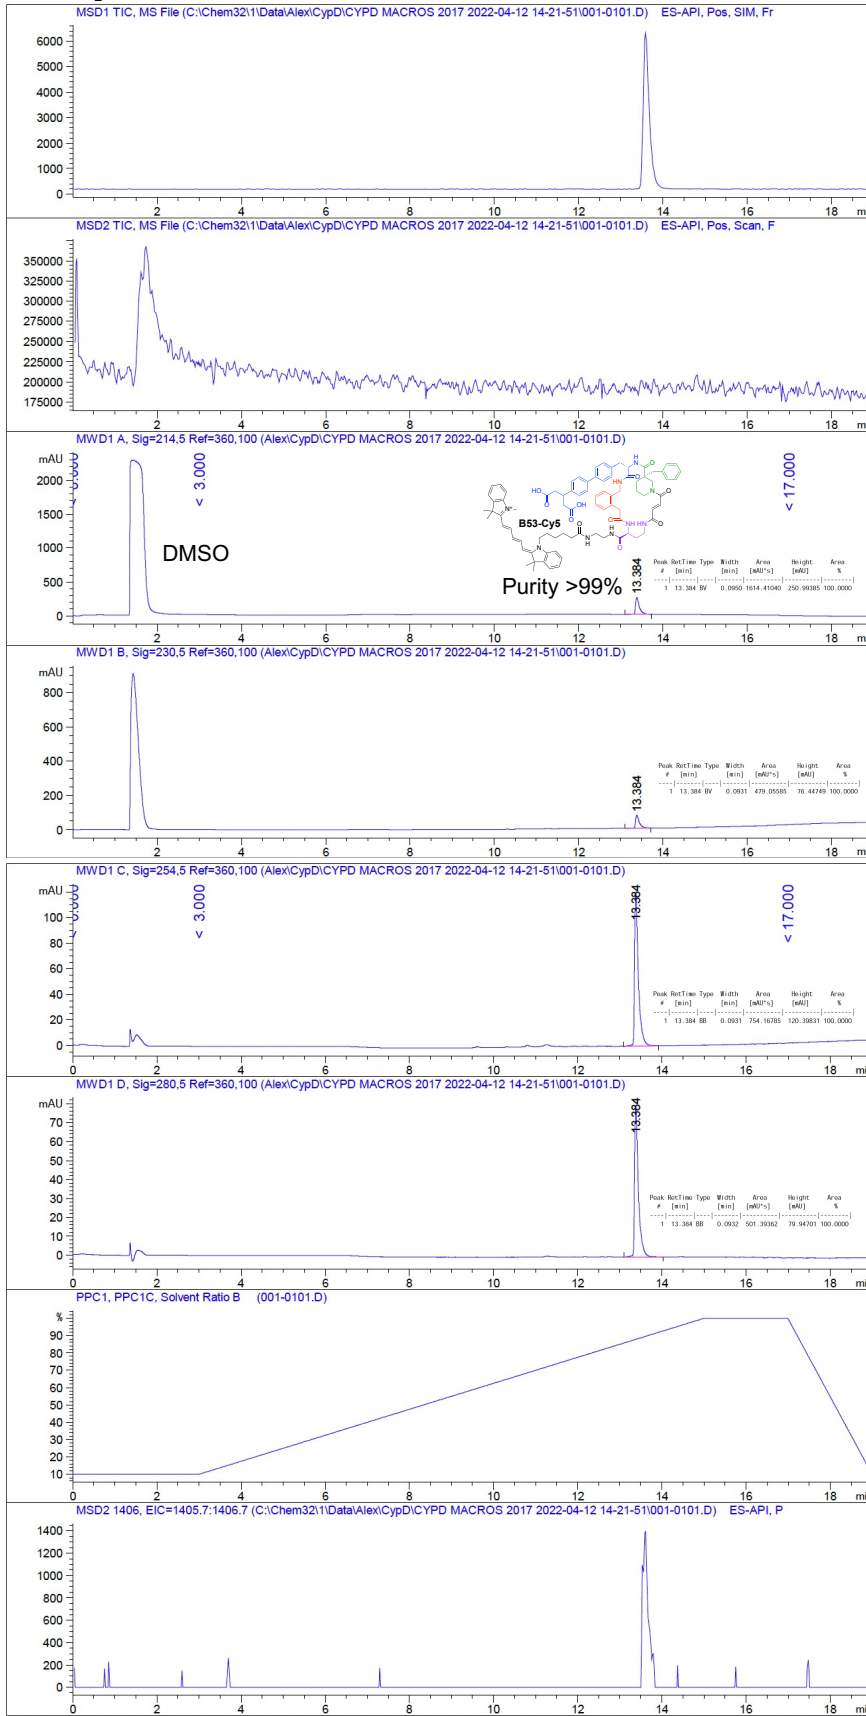

**\*B52-Cy5**

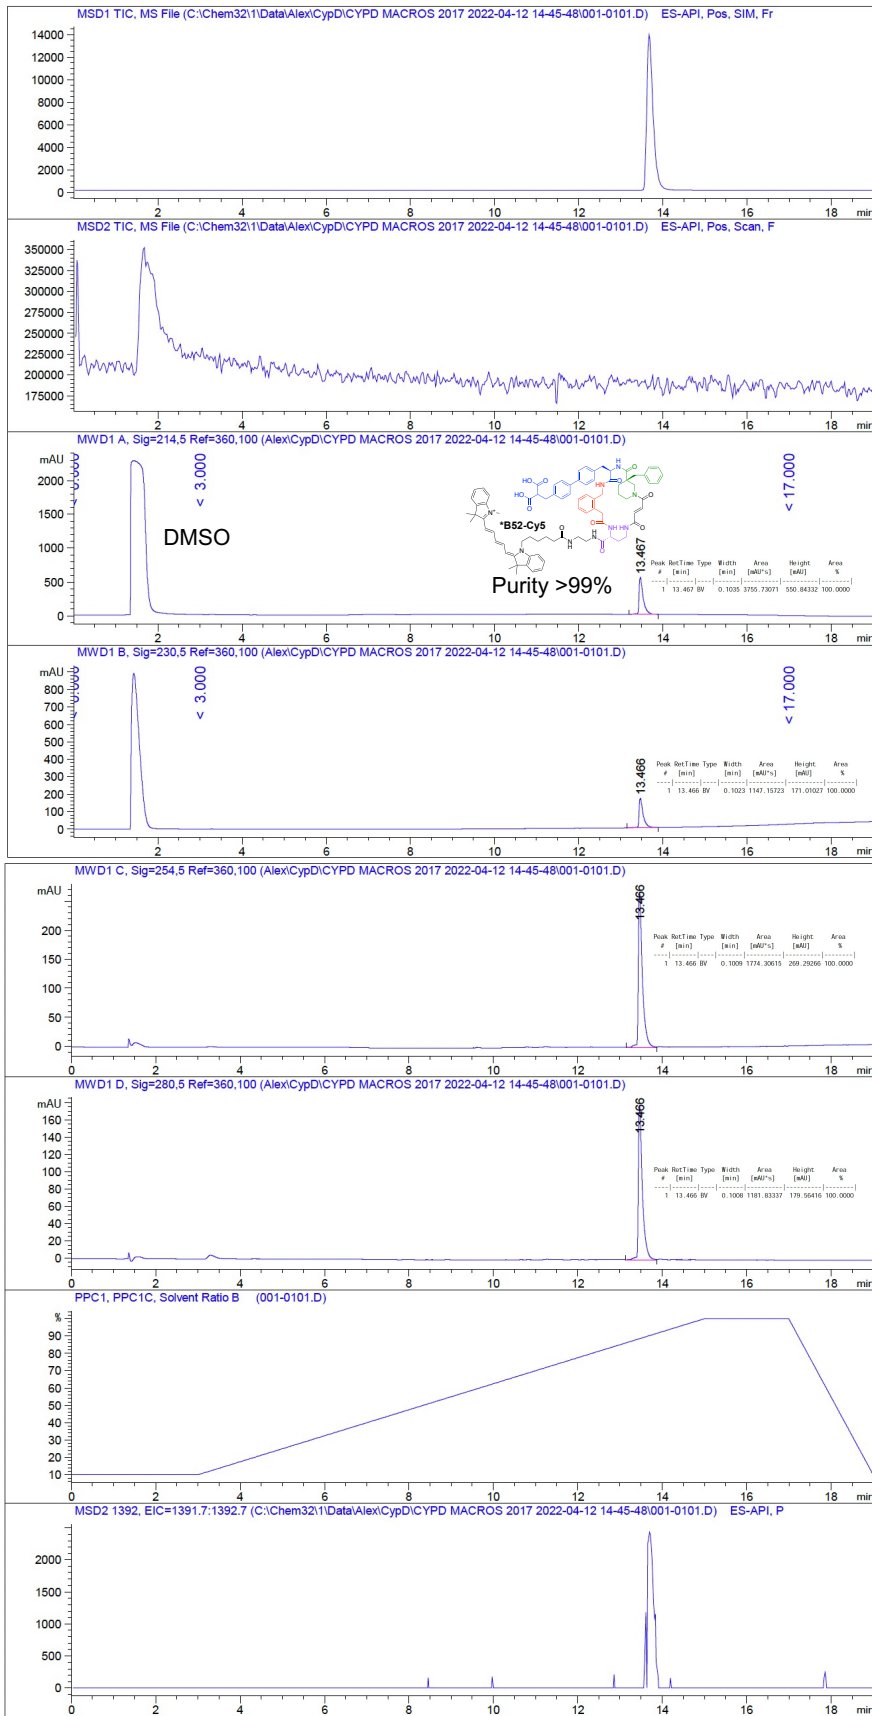

**\*B53-Cy5**

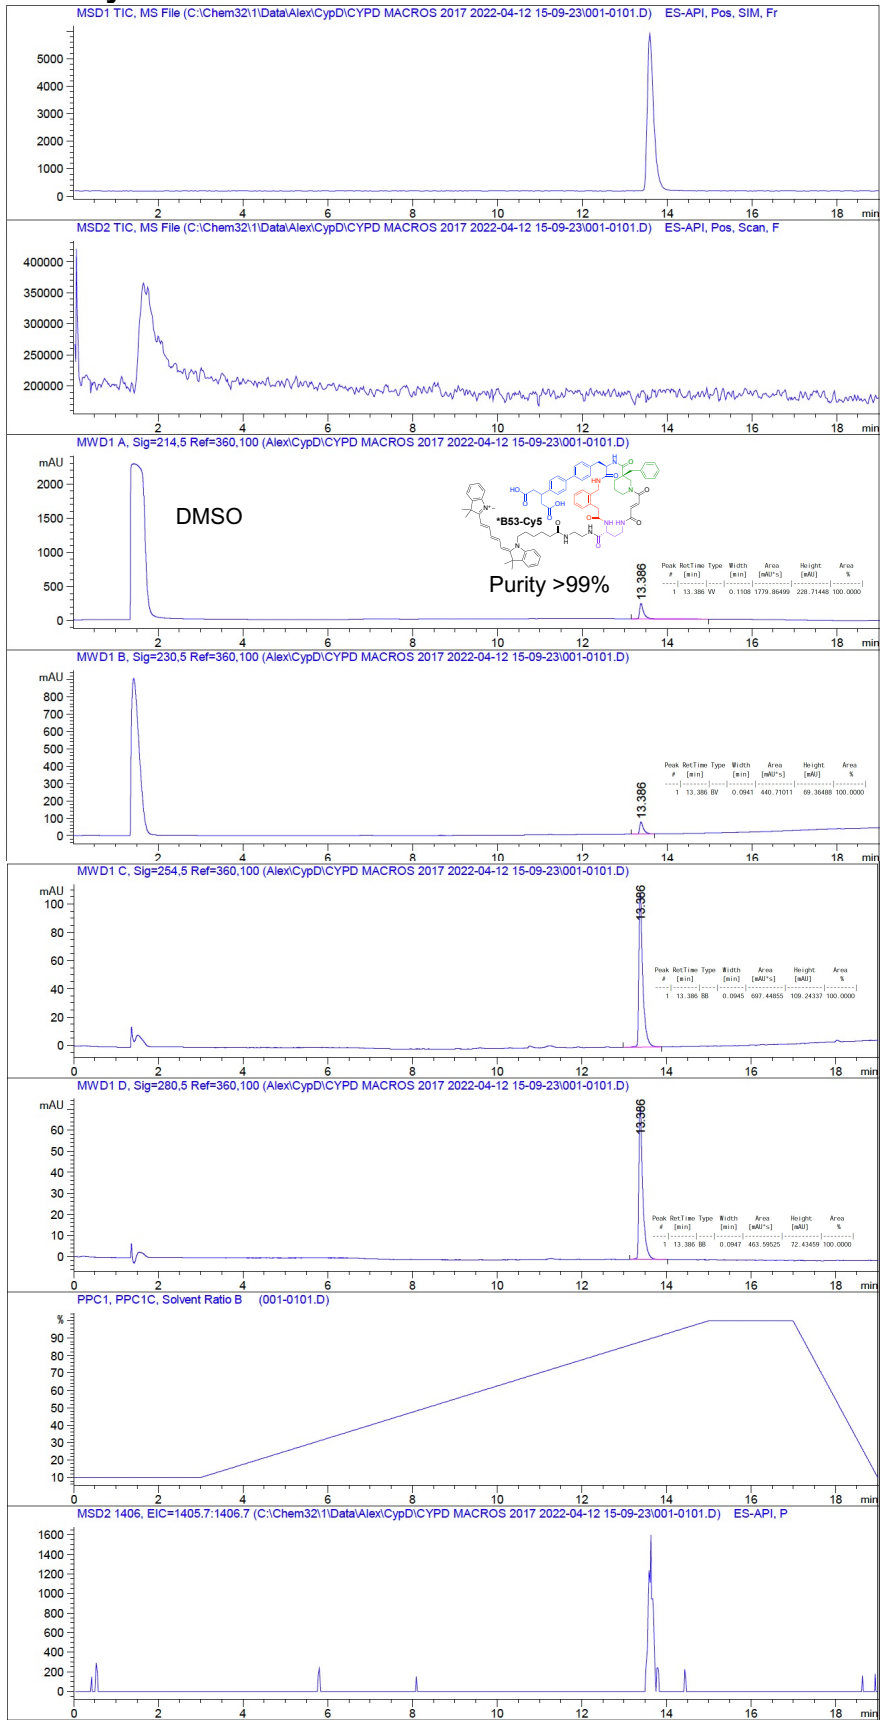

# B52-Et-Cy5

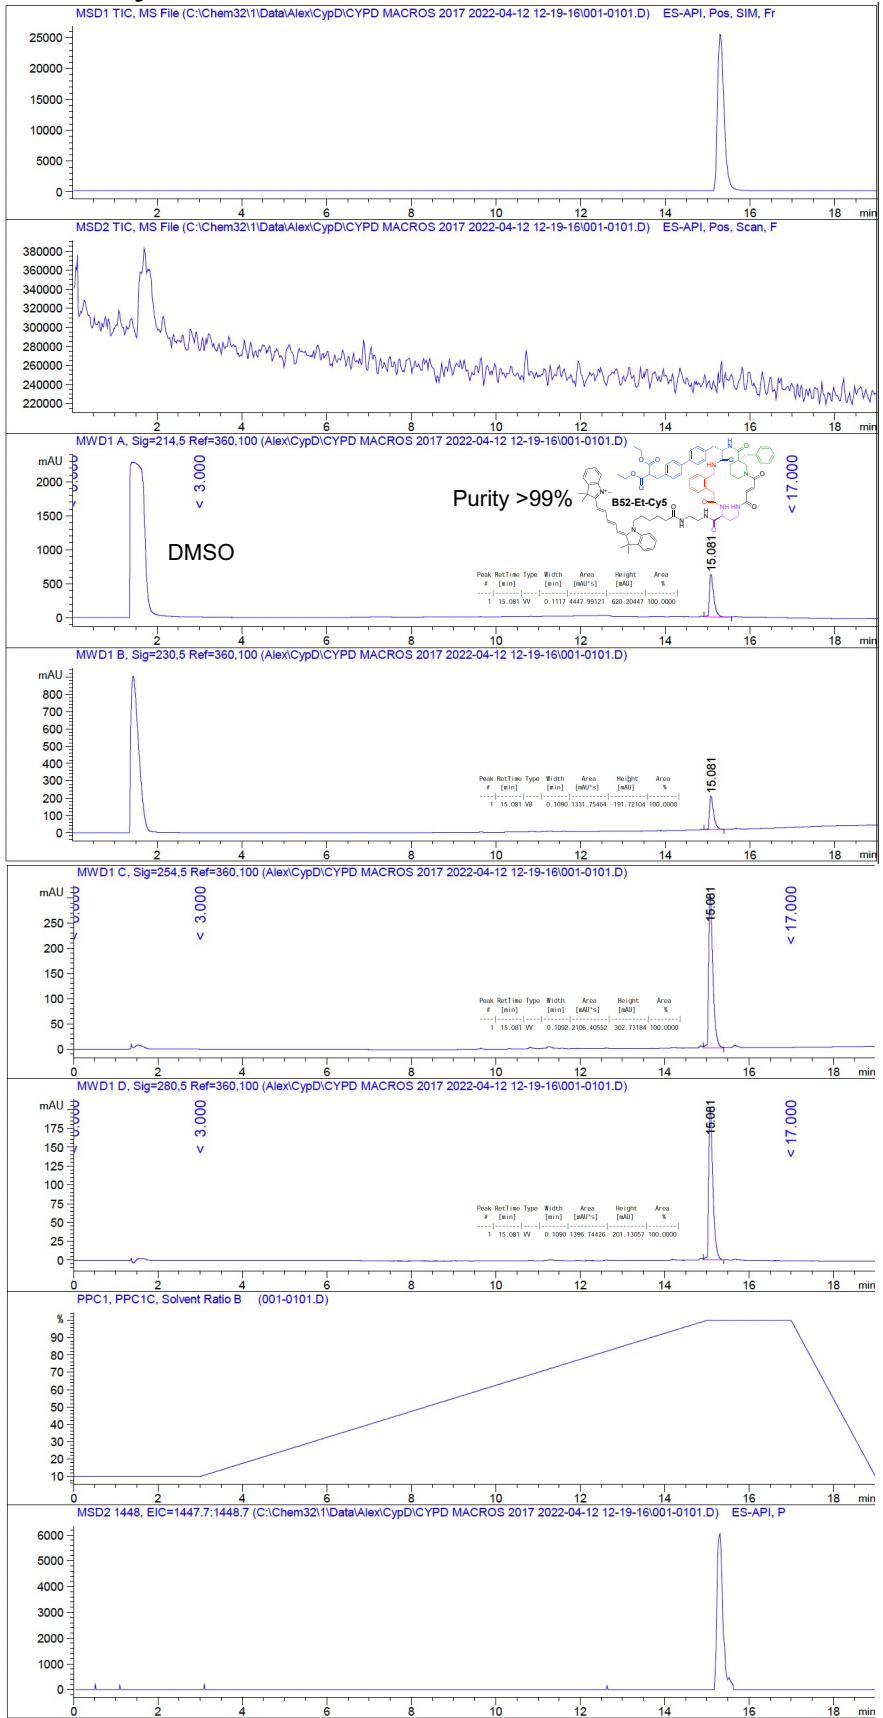

# B53-Et-Cy5

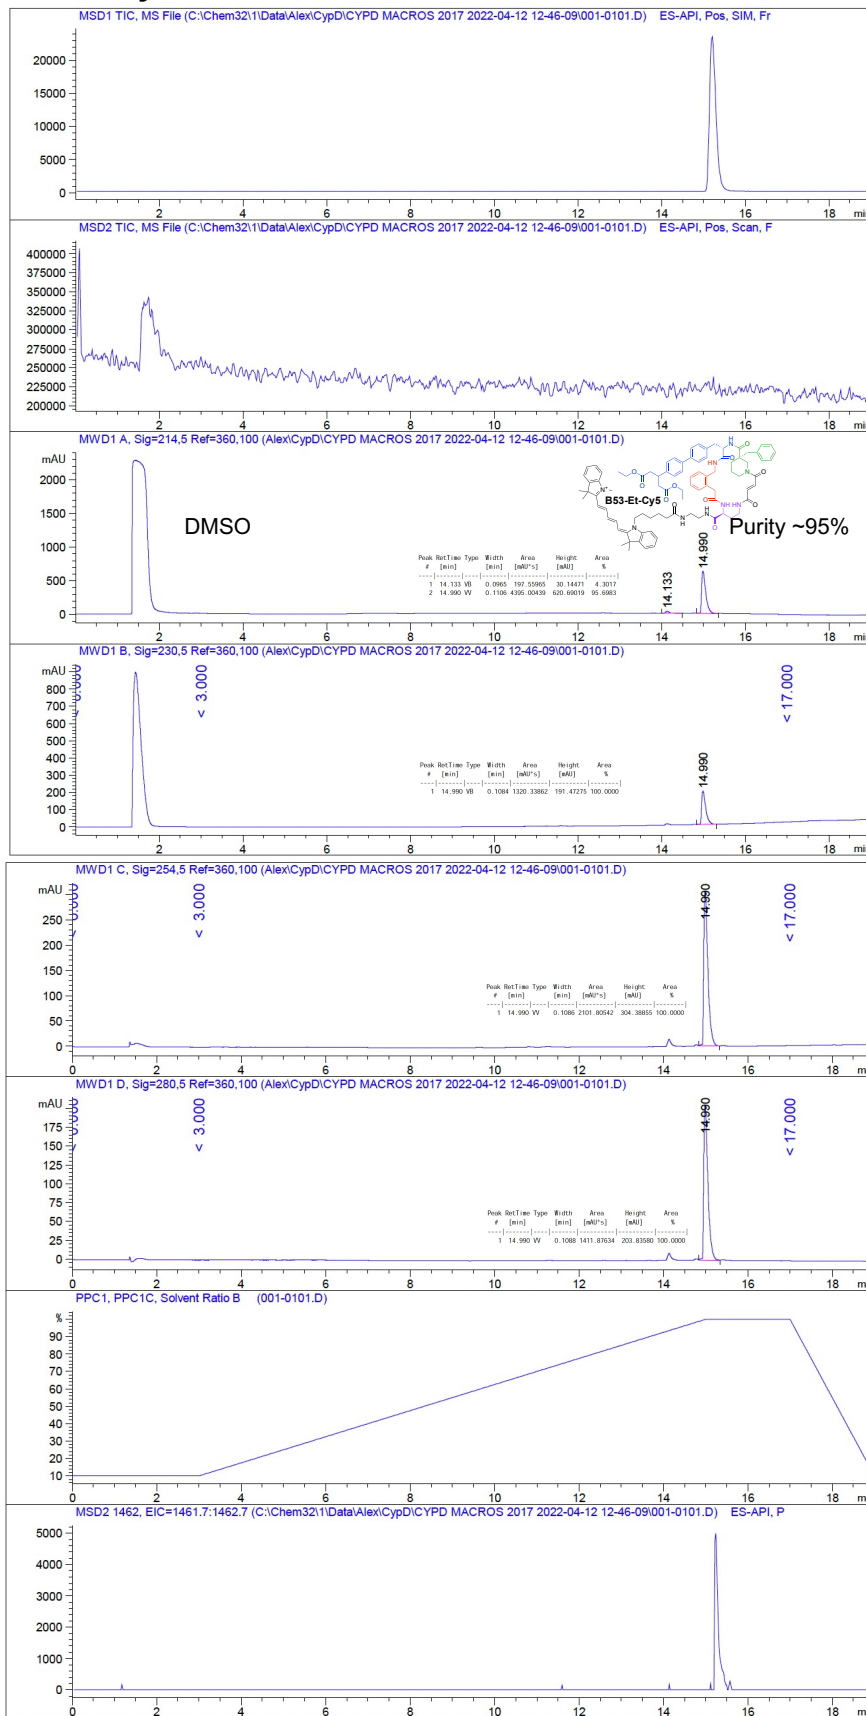

**\*B52-Et-Cy5**

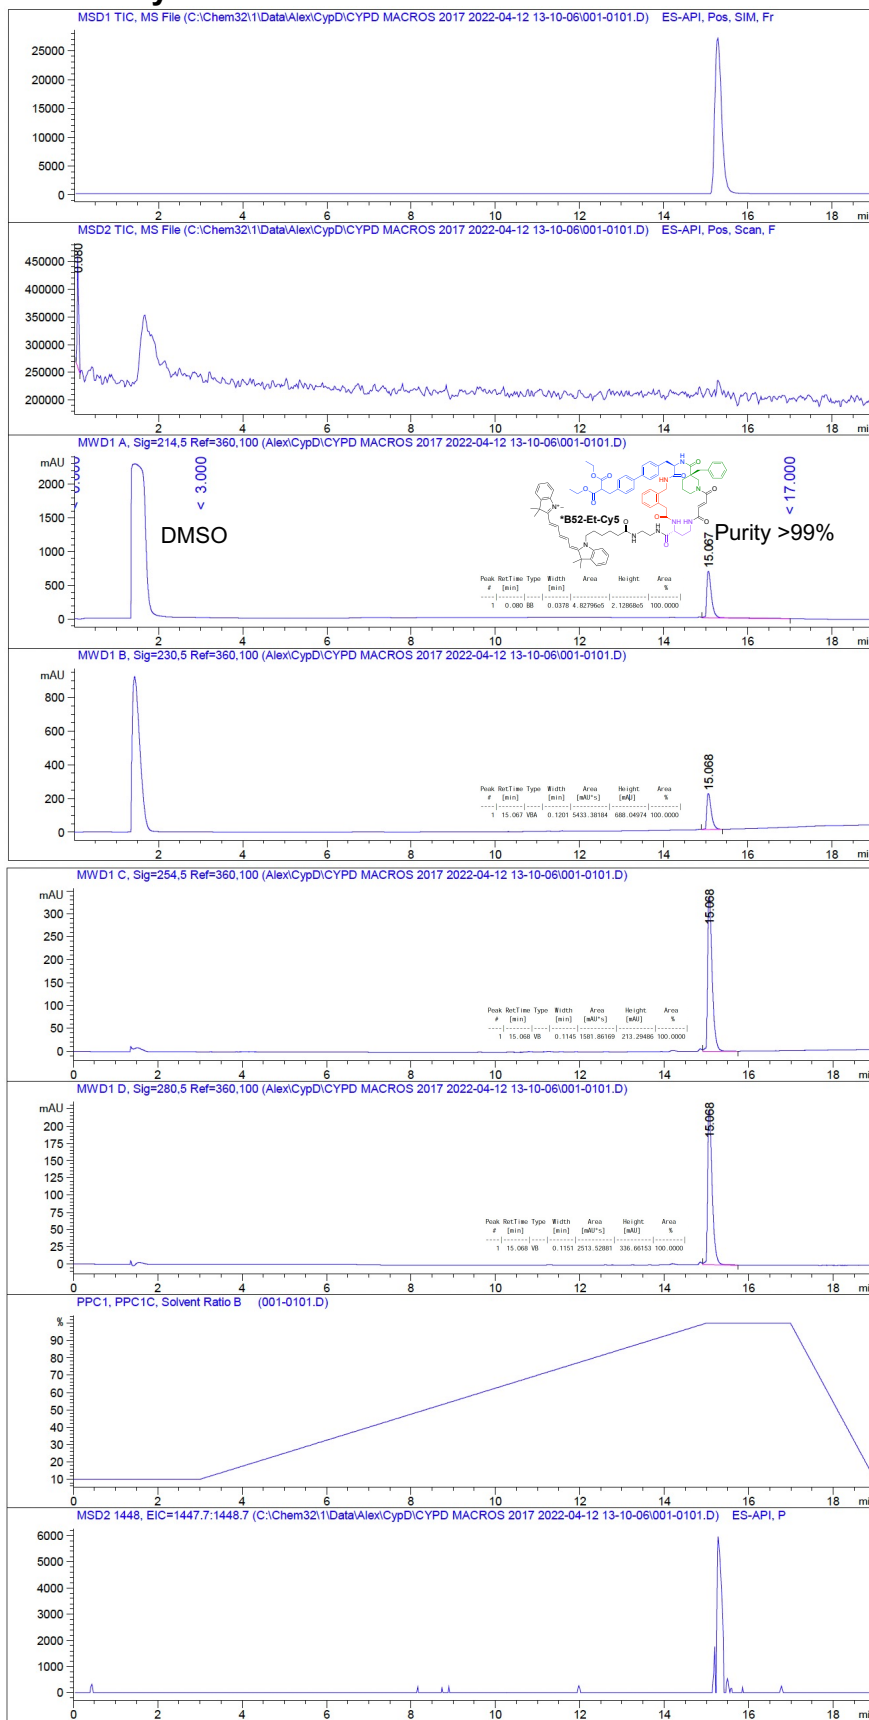



**\*B53-Et-Cy5**

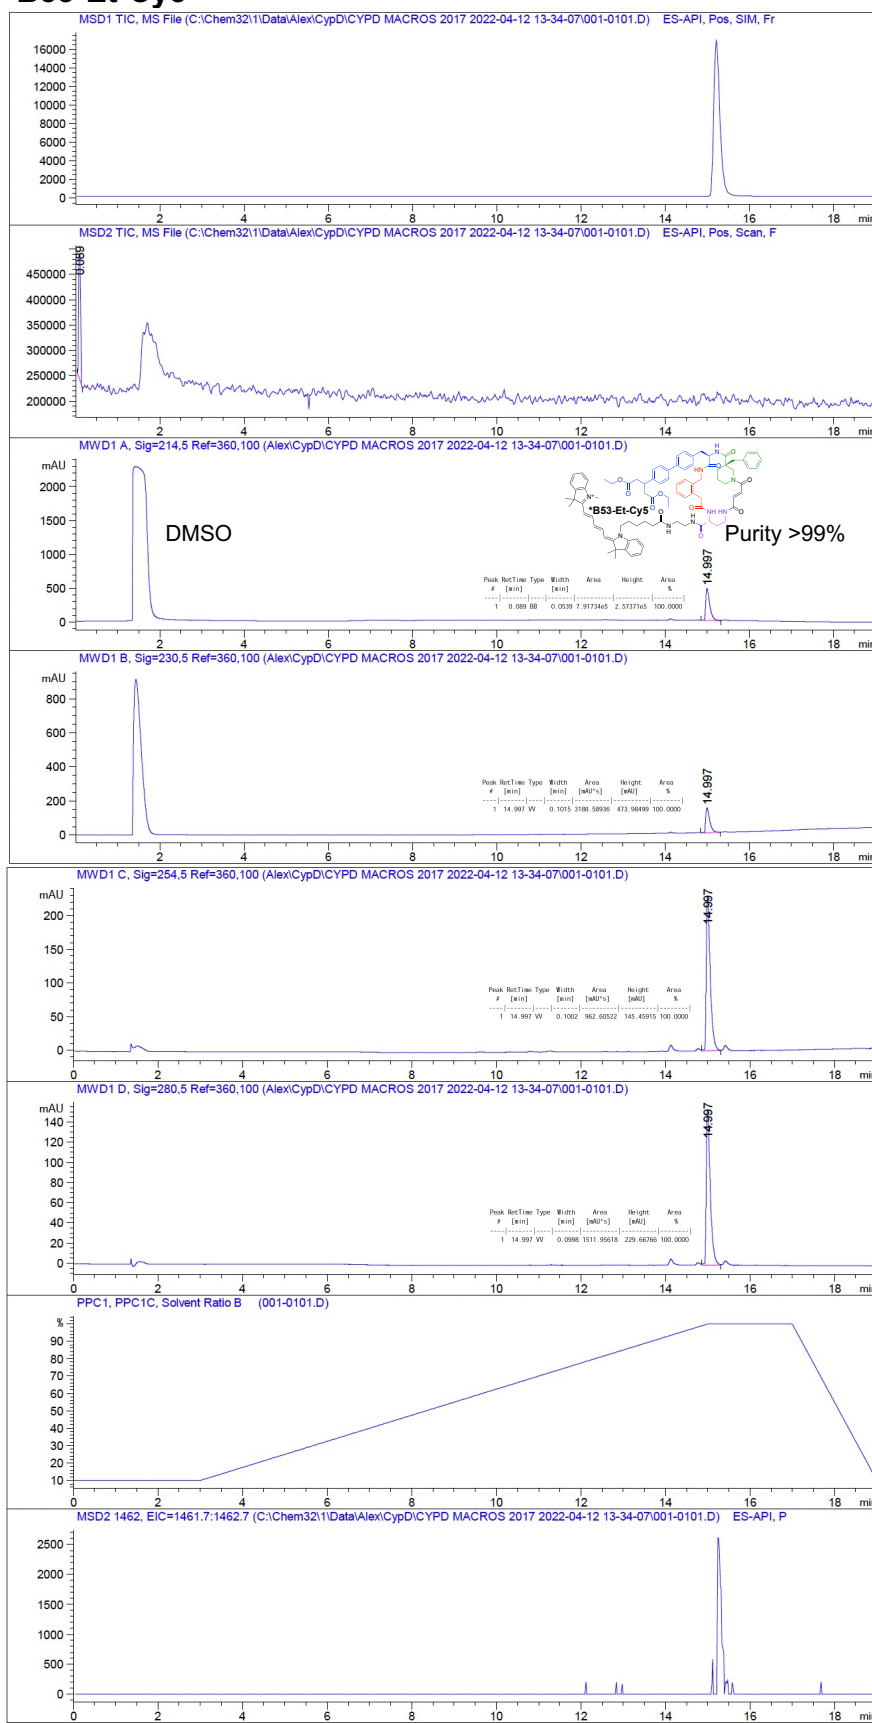

## Supplementary References

1. Usanov, D. L., Chan, A. I., Maianti, J. P. & Liu, D. R. Second-generation DNA-templated macrocycle libraries for the discovery of bioactive small molecules. *Nat. Chem.* **10**, 1–11 (2018).
2. Qiao, J. X. *et al.* Synthesis of Fmoc-Protected Arylphenylalanines (Bip Derivatives) via Nonaqueous Suzuki-Miyaura Cross-Coupling Reactions. *J. Org. Chem.* **81**, 9499–9506 (2016).
3. Hinkes, S. P. A. & Klein, C. D. P. Virtues of Volatility: A Facile Transesterification Approach to Boronic Acids. *Org. Lett.* **21**, 3048–3052 (2019).
4. Fretz, Heinz; Lyothier, Isabelle; Pothier, Julien; Richard-Bildstein, Sylvia; Sifferlen, Thierry; Wyder Peterson, Lorenza; Pozzi, D. & Corminboeuf, O. N-SUBSTITUTED INDOLE DERIVATIVES AS PGE2 RECEPTOR MODULATORS. (2017). doi:WO 2017/085198A1
5. Yang, D. *et al.* Synthesis and characterization of chiral N-O turns induced by  $\alpha$ -aminoxy acids. *J. Org. Chem.* **66**, 7303–7312 (2001).
6. Wilent, J. & Petersen, K. S. Enantioselective desymmetrization of diesters. *J. Org. Chem.* **79**, 2303–2307 (2014).
7. Lunn, D. J. *et al.* Scalable synthesis of an architectural library of well-defined poly(acrylic acid) derivatives: Role of structure on dispersant performance. *J. Polym. Sci. Part A Polym. Chem.* **57**, 716–725 (2019).
8. Quach, D. *et al.* Strategic Design of Catalytic Lysine-Targeting Reversible Covalent BCR-ABL Inhibitors. *Angew. Chemie - Int. Ed.* **60**, 17131–17137 (2021).
9. Crudden, C. M. *et al.* Iterative protecting group-free cross-coupling leading to chiral multiply arylated structures. *Nat. Commun.* **7**, 1–7 (2016).
